# Supplementary material for: Brain wide engraftment of human monocytes induces neurodegeneration and cognitive dysfunction
Source: Research Square preprint supplement (doi:10.21203/rs.3.rs-7762816/v1), 2025-10-10
Supplement: Supplementary file 1 [file 7690844feb5ca1b8ebd59272.xlsx]

## Sheet: sig_results_proteomics
Protein	Abs(logFC)	logFC	AveExpr	t	P.Value	adj.P.Val	B
HLA-DRB1	4.42508	4.42508	22.3043	16.6131	1.21E-11	2.28E-08	16.7441
HLA-DPB1	3.71546	3.71546	19.9175	10.3856	1.35E-08	3.85E-06	10.1121
GPNMB	3.50423	3.50423	19.5132	14.9767	5.95E-11	5.54E-08	15.2913
LYZ	2.86361	2.86361	18.4506	13.6157	2.52E-10	1.48E-07	13.943
HLA-DRA	2.85577	2.85577	20.9826	16.8826	9.44E-12	2.22E-08	16.9676
LGALS3	2.7939	2.7939	22.0414	12.7645	6.63E-10	3.47E-07	13.0263
TYMP	2.7225	2.7225	20.6577	13.7024	2.29E-10	1.48E-07	14.0331
TNFAIP2	2.58638	2.58638	14.7543	14.8712	6.63E-11	5.54E-08	15.1917
HLA-A	2.5035	2.5035	19.3057	11.8561	1.98E-09	8.87E-07	11.9786
CD14	2.49309	2.49309	20.1411	11.1813	4.66E-09	1.75E-06	11.1496
CD163	2.4147	2.4147	19.2298	16.2351	1.73E-11	2.71E-08	16.4235
MSR1	2.21471	2.21471	18.9153	12.0923	1.48E-09	7.33E-07	12.2583
HLA-DPA1	2.20636	2.20636	19.1047	9.80667	3.04E-08	7.53E-06	9.3132
HLA-B	2.16395	2.16395	19.3917	14.809	7.06E-11	5.54E-08	15.1325
LGALS3BP	2.15636	2.15636	19.0171	15.1116	5.19E-11	5.54E-08	15.4177
IFI30	2.10508	2.10508	19.9779	11.8101	2.09E-09	8.94E-07	11.9235
LSP1	2.0452	2.0452	20.2067	14.0068	1.64E-10	1.19E-07	14.3446
OAS2	2.00491	2.00491	18.2132	12.7991	6.37E-10	3.47E-07	13.0648
FTL	1.90679	1.90679	18.4177	8.53921	2.05E-07	3.03E-05	7.42323
IFI44	1.85284	1.85284	14.7973	5.27289	7.13E-05	0.00244311	1.55333
KYNU	1.81316	1.81316	14.8224	9.04384	9.37E-08	1.70E-05	8.19989
TGFBI	1.73051	1.73051	21.5728	24.3164	3.07E-14	9.65E-11	21.7861
OAS3	1.67814	1.67814	16.8343	9.82413	2.96E-08	7.53E-06	9.33786
EMILIN2	1.6335	1.6335	19.5175	10.4258	1.28E-08	3.75E-06	10.1661
CAPG	1.60636	1.60636	22.7693	8.52246	2.10E-07	3.05E-05	7.39686
CD74	1.57816	1.57816	19.0548	9.71482	3.47E-08	8.38E-06	9.18288
PLIN2	1.5405	1.5405	19.3537	5.55658	4.05E-05	0.00161166	2.12034
HLA-DMA	1.52902	1.52902	14.9497	13.6201	2.51E-10	1.48E-07	13.9477
PSMB9	1.50654	1.50654	17.9868	11.4683	3.22E-09	1.26E-06	11.5077
ASPG	1.4014	1.4014	17.7354	10.5742	1.04E-08	3.17E-06	10.3641
SERPINA1	1.39227	1.39227	16.6784	9.06915	9.01E-08	1.70E-05	8.23798
FCER1G	1.37495	1.37495	20.2225	11.8963	1.88E-09	8.86E-07	12.0266
GFAP	1.34169	1.34169	27.8188	9.2279	7.10E-08	1.42E-05	8.47506
ITGAX	1.33766	1.33766	19.724	8.97501	1.04E-07	1.79E-05	8.09588
ANXA2	1.33563	1.33563	25.099	8.34253	2.80E-07	3.77E-05	7.11148
LGALS1	1.32937	1.32937	24.9327	8.1448	3.85E-07	4.97E-05	6.79285
C4B	1.31126	1.31126	23.2662	10.8466	7.23E-09	2.62E-06	10.7214
LIPA	1.30021	1.30021	20.3305	10.6049	9.99E-09	3.17E-06	10.4049
S100A11	1.28884	1.28884	22.8357	9.07944	8.87E-08	1.70E-05	8.25344
KRT79	1.27566	1.27566	22.1671	8.15103	3.81E-07	4.97E-05	6.80298
C5AR1	1.26011	1.26011	17.5246	8.77957	1.41E-07	2.19E-05	7.79726
HLA-DMB	1.22628	1.22628	16.4687	7.76409	7.22E-07	8.00E-05	6.16436
NCF1B	1.21368	1.21368	16.5706	10.5741	1.04E-08	3.17E-06	10.364
ANXA1	1.20668	1.20668	22.2352	11.7767	2.18E-09	8.94E-07	11.8834
LGALS9	1.19399	1.19399	19.3307	9.06653	9.05E-08	1.70E-05	8.23404
KRT8	1.18955	1.18955	23.8896	7.60341	9.47E-07	9.99E-05	5.89308
APOBR	1.17115	1.17115	18.7677	8.79077	1.38E-07	2.19E-05	7.81452
PRPH	1.16723	1.16723	23.862	8.34407	2.79E-07	3.77E-05	7.11395
ALOX5	1.16116	1.16116	17.8927	5.84637	2.30E-05	0.00106808	2.68935
S100A6	1.14627	1.14627	22.6581	8.13671	3.90E-07	4.97E-05	6.77971
CTSS	1.13776	1.13776	18.2581	9.89264	2.69E-08	7.03E-06	9.43428
C1QC	1.12531	1.12531	21.4317	6.96733	2.86E-06	0.000236675	4.7835
SCIN	1.1207	1.1207	17.8131	3.7252	0.0017912	0.0216878	-1.65845
ADA2	1.12025	1.12025	18.7129	7.23795	1.78E-06	0.000165724	5.26256
PTPN6	1.10494	1.10494	21.5876	10.7539	8.18E-09	2.85E-06	10.6007
HMGN4	1.10461	1.10461	17.0955	8.77371	1.42E-07	2.19E-05	7.78823
C1QB	1.08285	1.08285	21.7561	6.94908	2.96E-06	0.000242031	4.75081
NCF4	1.04073	1.04073	16.9773	8.15244	3.80E-07	4.97E-05	6.80527
RNASE6	1.02354	1.02354	16.4461	7.11347	2.21E-06	0.000196446	5.04349
NCF2	0.997228	0.997228	19.3059	9.04405	9.36E-08	1.70E-05	8.20019
CD9	0.979019	0.979019	22.9643	9.90011	2.66E-08	7.03E-06	9.44475
CTSZ	0.978008	0.978008	22.8237	6.2524	1.06E-05	0.000644702	3.46802
SERPINA3N	0.963359	0.963359	20.6924	6.6442	5.13E-06	0.000366208	4.19787
HCLS1	0.9557	0.9557	21.1903	8.97307	1.04E-07	1.79E-05	8.09293
HSPB1	0.950111	0.950111	22.1565	6.0843	1.46E-05	0.000817502	3.14834
CTSD	0.943455	0.943455	25.1519	7.97447	5.09E-07	6.07E-05	6.51413
NPC2	0.924247	0.924247	21.3627	10.1119	1.97E-08	5.46E-06	9.73921
KRT86	0.905883	0.905883	21.2731	6.56286	5.96E-06	0.000415621	4.04811
FERMT3	0.883298	0.883298	21.4821	9.63351	3.90E-08	9.19E-06	9.06669
LRRC25	0.877853	0.877853	15.9793	6.78177	4.00E-06	0.000301173	4.44901
FCGR2A	0.873096	0.873096	16.5462	9.58526	4.18E-08	9.61E-06	8.99736
PTPRC	0.861112	0.861112	20.6004	6.52756	6.36E-06	0.000437039	3.98284
CD44	0.849337	0.849337	21.3752	7.35209	1.46E-06	0.000140871	5.46151
CYBA	0.840947	0.840947	17.4569	4.71237	0.000223807	0.00560709	0.407671
MX1	0.835227	0.835227	21.0784	7.33564	1.50E-06	0.000142651	5.43294
ITIH2	0.820508	0.820508	19.6105	6.59591	5.61E-06	0.000394073	4.10908
CTSH	0.813494	0.813494	18.2545	9.44348	5.15E-08	1.10E-05	8.79201
IFIT1	0.810848	0.810848	16.5117	4.90018	0.000151984	0.00435345	0.794888
TRPM4	0.788082	0.788082	16.6719	3.58809	0.00239883	0.0261303	-1.94568
SERPINA3F	0.775732	0.775732	20.0372	5.16742	8.82E-05	0.00281665	1.34016
C1QA	0.775465	0.775465	20.0209	5.25796	7.35E-05	0.00249935	1.52322
ASAH1	0.765664	0.765664	24.3199	7.39352	1.36E-06	0.0001345	5.53326
TAP2	0.763672	0.763672	15.7417	9.5561	4.37E-08	9.79E-06	8.95531
CX3CL1	0.738855	0.738855	20.0578	7.79878	6.81E-07	7.64E-05	6.22246
CYBB	0.718829	0.718829	21.9578	5.42763	5.23E-05	0.00195686	1.86379
FAM129A	0.706301	0.706301	17.3964	5.37045	5.87E-05	0.00209334	1.74939
VIM	0.704798	0.704798	28.0025	5.96913	1.82E-05	0.000918754	2.92712
FCGBP	0.67749	0.67749	22.9603	3.5612	0.00254025	0.0271923	-2.00189
MNDA	0.671784	0.671784	19.907	4.33197	0.000495081	0.0096158	-0.384496
IQGAP1	0.669707	0.669707	24.3575	9.49224	4.79E-08	1.05E-05	8.8629
ITGB2	0.669407	0.669407	21.2024	5.79211	2.56E-05	0.00115248	2.58364
ITIH1	0.665095	0.665095	20.0253	6.7535	4.21E-06	0.00031447	4.39761
PYCARD	0.66072	0.66072	19.7896	6.21133	1.15E-05	0.00068332	3.39027
FBP2	0.65684	0.65684	17.3913	3.35546	0.00393575	0.0367441	-2.43014
ACOXL	0.656793	0.656793	17.6592	6.6563	5.02E-06	0.000360941	4.22007
S100A4	0.653974	0.653974	16.9197	4.00769	0.000982317	0.0145266	-1.06502
SLC14A1	0.646759	0.646759	21.8793	6.90252	3.22E-06	0.000256728	4.66723
LPCAT2	0.638671	0.638671	17.4723	4.82961	0.000175699	0.00482532	0.649745
TBXAS1	0.63266	0.63266	18.6781	5.28364	6.98E-05	0.00241736	1.57497
PSMB10	0.625318	0.625318	18.942	8.0556	4.45E-07	5.45E-05	6.64739
OSMR	0.620636	0.620636	18.7351	7.70613	7.96E-07	8.72E-05	6.06692
AHNAK	0.620616	0.620616	24.2344	6.53514	6.27E-06	0.00043415	3.99687
TYROBP	0.620543	0.620543	16.4187	7.96657	5.16E-07	6.07E-05	6.5011
PSMB8	0.615344	0.615344	20.0868	7.94383	5.35E-07	6.23E-05	6.46357
CD59	0.607414	0.607414	19.3669	4.00219	0.000993855	0.0146742	-1.07658
CASP1	0.607021	0.607021	19.5702	7.0785	2.35E-06	0.000205085	4.98155
LAIR1	0.604056	0.604056	17.9656	4.22413	0.000621347	0.0111064	-0.610487
LCP1	0.603905	0.603905	24.3837	6.10096	1.41E-05	0.000796733	3.18021
ARHGAP18	0.59612	0.59612	19.7273	10.5935	1.01E-08	3.17E-06	10.3897
F13A1	0.586884	0.586884	20.2913	6.42356	7.70E-06	0.00050352	3.78951
MT-ATP6	0.575937	0.575937	16.2924	5.19286	8.38E-05	0.00272172	1.3917
SLC35F6	0.568794	0.568794	16.8586	5.8525	2.27E-05	0.00106599	2.70127
PTGR1	0.561416	0.561416	17.8703	5.91021	2.03E-05	0.0009946	2.81325
PTGS1	0.55741	0.55741	20.0739	8.53462	2.06E-07	3.03E-05	7.41601
B2M	0.5556	0.5556	19.695	8.4234	2.46E-07	3.46E-05	7.24029
CLIC1	0.555553	0.555553	23.863	6.87353	3.39E-06	0.000268154	4.61503
LPXN	0.552893	0.552893	17.7151	4.58313	0.000292684	0.00674104	0.139596
PDZD11	0.552124	0.552124	20.9106	3.67158	0.00200792	0.0232652	-1.77088
PARVG	0.549936	0.549936	17.6742	4.45565	0.000381935	0.00822806	-0.125977
CD63	0.547153	0.547153	20.1566	7.13588	2.12E-06	0.000190645	5.0831
FXYD1	0.546495	0.546495	19.2744	8.0923	4.20E-07	5.20E-05	6.70736
H2-D1	0.54483	0.54483	20.5309	3.4751	0.00305143	0.0308417	-2.18153
MGST2	0.543521	0.543521	16.9181	3.2692	0.00472681	0.0410762	-2.60848
SERPINB1	0.542972	0.542972	21.446	8.89881	1.17E-07	1.97E-05	7.98004
KRT6B	0.538387	0.538387	22.5066	3.66004	0.0020579	0.0236986	-1.79506
KRT5	0.533226	0.533226	22.4029	4.34117	0.000485602	0.00948399	-0.365249
SAMHD1	0.53291	0.53291	23.825	5.02707	0.000117266	0.0035865	1.05467
LCP2	0.52273	0.52273	17.1022	4.72644	0.000217384	0.00553485	0.436786
TRPV4	0.521925	0.521925	14.7209	6.44776	7.37E-06	0.00048866	3.83462
NFKB2	0.520928	0.520928	17.0421	6.41141	7.88E-06	0.000504985	3.76681
HSPB8	0.513188	0.513188	20.1949	3.89594	0.00124549	0.0170068	-1.29991
HMOX1	0.509097	0.509097	18.7688	6.90558	3.20E-06	0.000256728	4.67274
UGDH	0.505998	0.505998	20.3572	5.70707	3.02E-05	0.00130995	2.41717
ARPC1B	0.503388	0.503388	22.7508	6.517	6.48E-06	0.000440942	3.96327
NAAA	0.502435	0.502435	21.6393	4.29584	0.000534179	0.0100841	-0.460149
IFI35	0.495455	0.495455	17.9322	5.56443	3.99E-05	0.00160039	2.1359
HEXB	0.495133	0.495133	22.9027	5.95655	1.86E-05	0.000932614	2.90284
SLC22A4	0.494413	0.494413	19.6196	5.10304	0.000100487	0.0031448	1.20946
GBP2	0.492308	0.492308	19.6688	6.79979	3.87E-06	0.00029388	4.4817
S100A10	0.487418	0.487418	20.1524	4.94896	0.000137535	0.00404405	0.894933
TMEM176B	0.48675	0.48675	16.9355	4.82024	0.000179122	0.00487667	0.630438
MVP	0.474784	0.474784	23.4265	6.84133	3.59E-06	0.000279439	4.5569
VSIG4	0.474757	0.474757	15.833	3.58811	0.00239871	0.0261303	-1.94563
ANXA4	0.472906	0.472906	23.7413	4.53456	0.000323872	0.00724672	0.038521
LGI4	0.471635	0.471635	20.3309	8.77315	1.42E-07	2.19E-05	7.78736
RAB32	0.470874	0.470874	20.6658	4.02713	0.000942647	0.0142761	-1.02418
FLNC	0.470669	0.470669	22.8134	5.37885	5.77E-05	0.00209334	1.76622
TRIM47	0.470447	0.470447	17.4937	9.32754	6.12E-08	1.28E-05	8.62227
STEAP3	0.44096	0.44096	20.4907	4.07249	0.000856215	0.013465	-0.928842
TRIM25	0.440075	0.440075	19.3963	5.54513	4.15E-05	0.00164155	2.09765
SLC25A24	0.438979	0.438979	22.7254	8.75318	1.46E-07	2.22E-05	7.75657
RENBP	0.431749	0.431749	18.9922	4.68517	0.000236777	0.00583885	0.351359
BST1	0.430945	0.430945	15.8847	3.18113	0.00569638	0.0465393	-2.78961
DAB2	0.428821	0.428821	20.6271	5.37355	5.83E-05	0.00209334	1.75559
H2-K1	0.427408	0.427408	18.7691	5.20871	8.12E-05	0.00266344	1.42376
ANXA5	0.424326	0.424326	26.2179	5.22688	7.82E-05	0.00259503	1.46049
PLEK	0.42245	0.42245	18.5457	3.79971	0.00152844	0.0194042	-1.50208
NAPRT	0.413303	0.413303	21.0759	8.86147	1.24E-07	2.05E-05	7.923
PRDX6	0.413295	0.413295	27.0215	5.68381	3.16E-05	0.00132806	2.37147
MT-ND4	0.412999	0.412999	14.1657	4.22001	0.000626762	0.0111384	-0.619112
RNASE4	0.411008	0.411008	18.0441	3.79426	0.00154626	0.019542	-1.51351
FCHO2	0.410272	0.410272	21.7651	8.40919	2.52E-07	3.48E-05	7.21772
TPP1	0.407591	0.407591	22.3165	7.02651	2.58E-06	0.000216834	4.88915
GIMAP1	0.40627	0.40627	17.3169	3.96614	0.0010729	0.0154066	-1.15236
TFB2M	0.406239	0.406239	14.3458	5.38993	5.64E-05	0.00208463	1.7884		in astros
MSN	0.405132	0.405132	26.0009	7.05796	2.44E-06	0.000208804	4.94511
PDLIM4	0.403331	0.403331	20.5311	5.52877	4.28E-05	0.00167436	2.06519
TAGLN2	0.401363	0.401363	24.0768	5.82433	2.40E-05	0.00110444	2.64645
IQGAP2	0.401273	0.401273	24.4312	7.40432	1.33E-06	0.000133422	5.55192
STAT1	0.401168	0.401168	22.8365	6.81457	3.77E-06	0.000288472	4.50849
H2-T23	0.400859	0.400859	17.6599	4.42806	0.000404652	0.00854216	-0.183577
KRT75	0.39718	0.39718	22.421	4.81065	0.000182695	0.00494537	0.610673
TM6SF1	0.395763	0.395763	16.8822	5.88514	2.14E-05	0.00103162	2.76467
LDLRAP1	0.39328	0.39328	14.0793	3.94061	0.00113268	0.0159144	-1.20602
BDH2	0.392623	0.392623	17.2447	4.98256	0.000128408	0.00385223	0.963723
VAV1	0.385982	0.385982	17.8214	3.34902	0.00398998	0.0371033	-2.44349
PARP9	0.384824	0.384824	16.9593	9.24618	6.90E-08	1.41E-05	8.50216
SWAP70	0.378099	0.378099	23.0454	6.71951	4.47E-06	0.000331838	4.33567
STAT3	0.376819	0.376819	22.2124	8.12805	3.96E-07	4.97E-05	6.76563
GALM	0.372664	0.372664	18.6366	3.98862	0.0010229	0.0148929	-1.10511
PLSCR1	0.369895	0.369895	17.6418	5.27657	7.08E-05	0.00243481	1.56073
ITGA7	0.368955	0.368955	20.732	6.33682	9.06E-06	0.000564918	3.62709
FBN1	0.366936	0.366936	19.2966	4.70704	0.000226287	0.00565418	0.396654
PARP3	0.36502	0.36502	18.5194	5.52153	4.35E-05	0.00169148	2.05081
MYOF	0.361688	0.361688	22.6457	4.82487	0.000177422	0.00485489	0.639978
RIDA	0.361475	0.361475	24.5121	4.8844	0.000156986	0.00446771	0.762467
DES	0.360042	0.360042	26.2847	4.03906	0.000919092	0.0140824	-0.999098
STOM	0.358448	0.358448	19.5846	5.68972	3.12E-05	0.00131956	2.38309
AKR1B1	0.357699	0.357699	25.3366	7.34875	1.47E-06	0.000140871	5.45571
IL16	0.357406	0.357406	19.0718	4.39897	0.000430094	0.00884824	-0.244343
VAMP8	0.353714	0.353714	18.5822	5.13896	9.34E-05	0.00297341	1.28245
DYNLRB2	0.345285	0.345285	17.579	4.25663	0.000580178	0.0105912	-0.542324
CD4	0.343442	0.343442	15.0754	4.17048	0.000695884	0.01178	-0.723061
CNN3	0.343219	0.343219	23.0446	5.79739	2.53E-05	0.00114622	2.59393
PM20D1	0.341704	0.341704	18.2247	3.65643	0.00207379	0.0238524	-1.80262
CBFB	0.339676	0.339676	18.9562	5.59202	3.78E-05	0.00152873	2.19051
CST3	0.337647	0.337647	21.8637	6.01736	1.66E-05	0.000875852	3.01998		oligos
DCK	0.336097	0.336097	16.1776	4.69692	0.000231083	0.00571338	0.375692
S100A16	0.329318	0.329318	21.5257	7.84135	6.35E-07	7.20E-05	6.29351
CSTB	0.327809	0.327809	23.6424	6.01713	1.66E-05	0.000875852	3.01954
S100A13	0.323731	0.323731	23.1505	7.08531	2.32E-06	0.000204524	4.99364		oligos
CD109	0.318919	0.318919	19.3014	3.20655	0.00539793	0.0450385	-2.73743
GGT5	0.318274	0.318274	19.6347	5.36294	5.96E-05	0.00211696	1.73433
PXDC1	0.313859	0.313859	14.3133	3.14688	0.00612424	0.0488895	-2.85977
IL33	0.309978	0.309978	19.484	3.50467	0.00286528	0.0295953	-2.1199		oligos
DPYD	0.305296	0.305296	19.6875	4.83656	0.000173203	0.00478467	0.664065
GPX1	0.304767	0.304767	23.7172	5.18161	8.57E-05	0.00276519	1.36891
DNMBP	0.296644	0.296644	18.449	3.78416	0.00157987	0.0197641	-1.53472
WAS	0.295401	0.295401	17.1069	4.00864	0.000980344	0.0145266	-1.06303
RCN3	0.295322	0.295322	16.1704	3.44991	0.0032195	0.0320588	-2.23398
MXRA8	0.294023	0.294023	15.3784	3.19694	0.00550898	0.0458028	-2.75718
PSAP	0.293642	0.293642	25.2827	5.05344	0.000111137	0.00343248	1.10848
CNN2	0.291219	0.291219	20.0764	6.15561	1.27E-05	0.000745036	3.28443
PDIA4	0.291149	0.291149	24.5729	4.52559	0.000329989	0.00734869	0.0198478
GBP4	0.290773	0.290773	19.1041	5.47802	4.74E-05	0.00181369	1.96428
CTBS	0.289706	0.289706	19.6083	5.24289	7.58E-05	0.00253054	1.49283
TES	0.287837	0.287837	18.9418	4.02458	0.000947759	0.0142913	-1.02954
PSME2	0.285457	0.285457	21.8526	7.13633	2.12E-06	0.000190645	5.08389
FLNB	0.284601	0.284601	24.0259	4.85466	0.000166875	0.00466458	0.701315
HEXA	0.284384	0.284384	22.2235	5.24567	7.53E-05	0.00253054	1.49843
ALDH1L2	0.28386	0.28386	22.9314	5.98133	1.77E-05	0.000913611	2.95063
TBC1D2B	0.281873	0.281873	18.3928	6.41946	7.76E-06	0.00050352	3.78185
YBX1	0.281861	0.281861	20.884	5.74722	2.79E-05	0.00122825	2.49588
SULF2	0.281248	0.281248	17.2493	5.97583	1.79E-05	0.000918278	2.94003
ASPH	0.279584	0.279584	20.2083	6.83576	3.63E-06	0.000279941	4.54683		oligos
ALDH1A1	0.279218	0.279218	24.498	4.41124	0.000419171	0.00873582	-0.21871
NAGK	0.278522	0.278522	23.3008	7.68255	8.28E-07	8.97E-05	6.02713
EEF2K	0.27812	0.27812	16.7339	3.6639	0.00204105	0.0235911	-1.78698
SLC39A14	0.27519	0.27519	16.7124	3.30446	0.00438602	0.0395372	-2.53568
H2-L	0.271467	0.271467	19.7855	4.83798	0.000172699	0.00478467	0.66698
ZHX2	0.268379	0.268379	17.6038	4.98572	0.000127581	0.00383966	0.970192
GJA1	0.268344	0.268344	23.8044	4.84302	0.000170918	0.0047494	0.677357
PRDX4	0.26656	0.26656	24.8362	5.90945	2.04E-05	0.0009946	2.81177
ETV6	0.263707	0.263707	18.1448	5.26831	7.20E-05	0.00245676	1.5441
VWA5A	0.260732	0.260732	23.3601	7.49344	1.14E-06	0.000116972	5.70533
YBX3	0.260322	0.260322	20.7126	5.92854	1.96E-05	0.000973838	2.84872
DLEC1	0.259177	0.259177	14.7458	3.64324	0.00213292	0.024282	-1.83026
RRBP1	0.258199	0.258199	24.2102	4.67258	0.000243039	0.00591582	0.325273		oligos
NECAP2	0.257075	0.257075	20.6525	6.012	1.67E-05	0.000875852	3.00968
S100A1	0.256069	0.256069	22.1611	5.93778	1.93E-05	0.000961739	2.86659
BAG3	0.2541	0.2541	20.3795	4.24924	0.00058929	0.0106752	-0.55782
IL18	0.253109	0.253109	19.9784	3.64335	0.0021324	0.024282	-1.83002
EIF2AK2	0.251617	0.251617	20.2046	6.11194	1.38E-05	0.000784991	3.20117		oligos
MLC1	0.251439	0.251439	21.3164	5.87845	2.16E-05	0.00103971	2.75168		astros
CAST	0.251103	0.251103	21.3699	4.02363	0.000949665	0.0142913	-1.03153
PSME1	0.250088	0.250088	23.5566	6.13686	1.32E-05	0.00075786	3.24872
DHRS7	0.248324	0.248324	22.4787	4.46467	0.000374793	0.00811621	-0.107155
SCARA3	0.246502	0.246502	16.1751	4.42618	0.000406251	0.00854216	-0.187507
STON1	0.246273	0.246273	15.6985	4.7253	0.000217898	0.00553485	0.434425
CNN1	0.245221	0.245221	21.1805	3.52545	0.00274121	0.0286668	-2.07654
AFAP1L2	0.244216	0.244216	17.4452	7.13587	2.13E-06	0.000190645	5.08308
CLU	0.243093	0.243093	23.8411	4.74115	0.000210872	0.00547222	0.467197
FOSB	0.24258	0.24258	18.1213	3.76787	0.00163562	0.0202465	-1.56892
HGF	0.242032	0.242032	16.1486	5.99137	1.74E-05	0.000901114	2.96998
NOTCH3	0.237466	0.237466	16.9549	5.28567	6.95E-05	0.00241639	1.57907
DOCK8	0.235949	0.235949	18.6069	5.3382	6.26E-05	0.00219881	1.6847
ABCC4	0.235483	0.235483	21.0389	6.01733	1.66E-05	0.000875852	3.01992
GRN	0.23417	0.23417	20.6539	3.94743	0.00111638	0.015743	-1.19168
PAPSS2	0.233349	0.233349	20.7367	6.20182	1.17E-05	0.000691304	3.37225
PLOD3	0.232915	0.232915	17.5701	4.20182	0.000651294	0.0113328	-0.65727
CD151	0.232909	0.232909	19.9483	3.85834	0.00134915	0.0180221	-1.37891
SLC5A3	0.232887	0.232887	19.4184	5.33646	6.28E-05	0.00219881	1.68121
SLC5A5	0.232537	0.232537	16.4771	4.08498	0.000833863	0.0132017	-0.902606
C9ORF64	0.231933	0.231933	19.0889	4.77187	0.000197907	0.00517856	0.530662
GBP6	0.231514	0.231514	18.8708	3.99202	0.00101553	0.0148777	-1.09796
TOGARAM2	0.230655	0.230655	18.7319	3.98559	0.00102949	0.0149184	-1.11147
PPFIBP2	0.228109	0.228109	18.5353	7.46293	1.20E-06	0.000121926	5.65293
ERP29	0.222541	0.222541	24.2807	5.2764	7.08E-05	0.00243481	1.5604
TRIOBP	0.221843	0.221843	18.5368	3.57407	0.00247157	0.0266387	-1.975
FLNA	0.221485	0.221485	24.7755	3.8387	0.00140673	0.0183537	-1.42018
PLOD1	0.220797	0.220797	17.28	3.26802	0.00473865	0.0411032	-2.61091
DHRS1	0.219468	0.219468	24.8175	4.72378	0.000218584	0.00553485	0.431284
NPL	0.218711	0.218711	22.0768	3.75719	0.00167323	0.0206037	-1.59133
EPHX1	0.21848	0.21848	23.4277	4.18601	0.000673416	0.0116183	-0.690458
VAMP5	0.218273	0.218273	17.1737	4.11671	0.00077968	0.012751	-0.835947
CHST2	0.218151	0.218151	19.1707	4.61402	0.000274464	0.00646363	0.203783
NFATC1	0.216185	0.216185	15.2355	3.16686	0.00587089	0.0474994	-2.81885
ABCA1	0.21519	0.21519	21.8343	4.52677	0.000329177	0.00734798	0.0223053
COL6A1	0.212901	0.212901	20.7223	3.72411	0.00179537	0.0216982	-1.66075
FKBP10	0.212662	0.212662	17.3532	3.17423	0.00578011	0.046979	-2.80376
TNFAIP8	0.212098	0.212098	19.7138	7.26755	1.69E-06	0.000158959	5.31434
COL6A2	0.211903	0.211903	20.6994	4.39697	0.000431904	0.00886392	-0.248529
TRIM21	0.209754	0.209754	18.7954	5.60446	3.69E-05	0.0015047	2.21509
INO80	0.209707	0.209707	15.7769	3.60597	0.00230915	0.0255152	-1.90827
CALN1	0.209559	0.209559	18.2134	3.52533	0.00274191	0.0286668	-2.07679
LAP3	0.209335	0.209335	24.4825	4.36338	0.00046346	0.00919115	-0.318775
RNH1	0.20907	0.20907	23.8542	5.75879	2.73E-05	0.00120653	2.51851
ORMDL2	0.206299	0.206299	18.8086	3.47445	0.00305569	0.0308517	-2.1829
CTNNAL1	0.205502	0.205502	18.8251	3.69856	0.00189578	0.0223507	-1.71433
ABCD4	0.205356	0.205356	17.8778	4.39885	0.000430201	0.00884824	-0.244592
UACA	0.20394	0.20394	18.351	5.64691	3.39E-05	0.00140872	2.29886
PRDX1	0.203859	0.203859	26.5557	6.02398	1.64E-05	0.000875852	3.0327
RIGI	0.203272	0.203272	19.417	3.81804	0.00146996	0.0189081	-1.46358
OSTC	0.202843	0.202843	18.8646	3.33316	0.0041267	0.037991	-2.47632
2025-09-02	0.202262	0.202262	23.3241	5.96713	1.82E-05	0.000918754	2.92325
SQOR	0.201584	0.201584	22.666	5.85736	2.25E-05	0.00106599	2.71072
SLC25A21	0.200468	0.200468	18.7433	3.56448	0.00252256	0.0270953	-1.99503
ANXA3	0.199859	0.199859	22.8126	4.20834	0.000642396	0.0112465	-0.643599
PDIA6	0.199229	0.199229	24.2734	3.84324	0.00139321	0.0182423	-1.41064
ITGA5	0.198707	0.198707	19.2281	4.63351	0.000263569	0.00628562	0.244244
LIMS1	0.198299	0.198299	22.0826	4.39208	0.000436362	0.00891655	-0.25876
ADIPOR1	0.197914	0.197914	17.1824	3.25438	0.00487771	0.0416952	-2.63903
IGFBP5	0.19764	0.19764	17.7033	3.85724	0.00135234	0.0180221	-1.38124
SSH3	0.197532	0.197532	18.6793	6.02866	1.62E-05	0.000875852	3.0417
APRT	0.19751	0.19751	22.2364	4.13908	0.000743641	0.0123394	-0.788973
LXN	0.197415	0.197415	21.8455	5.25075	7.46E-05	0.00251767	1.50868
AQP4	0.197352	0.197352	23.2246	4.27434	0.000558928	0.010426	-0.505209
DBI	0.196902	0.196902	24.5911	3.36193	0.003882	0.0364737	-2.41673
STK3	0.196154	0.196154	20.9664	5.37285	5.84E-05	0.00209334	1.7542
LAMP2	0.19586	0.19586	20.8918	5.05981	0.000109706	0.00339945	1.12146
SNX9	0.195387	0.195387	21.5477	4.94799	0.000137807	0.00404405	0.892957
PACC1	0.194923	0.194923	16.4481	3.35563	0.0039343	0.0367441	-2.42978
AMPD3	0.193737	0.193737	22.7578	6.67336	4.87E-06	0.000352575	4.25132
OAT	0.193665	0.193665	23.8919	5.22723	7.82E-05	0.00259503	1.46119
ITGB1	0.193076	0.193076	23.2457	5.37179	5.85E-05	0.00209334	1.75206
CD99	0.191478	0.191478	19.9786	3.29374	0.00448702	0.0399129	-2.55784
CYP7B1	0.19146	0.19146	20.317	6.4279	7.64E-06	0.000503453	3.79759
LAMP1	0.191353	0.191353	22.7871	5.37818	5.78E-05	0.00209334	1.76488
RIOX2	0.190664	0.190664	17.1535	4.93161	0.000142505	0.00413564	0.859382
APH1A	0.190633	0.190633	15.8654	3.31299	0.00430733	0.0390874	-2.51805
LMCD1	0.190188	0.190188	21.0031	4.41232	0.000418223	0.0087354	-0.216454
PPFIBP1	0.189353	0.189353	19.5999	3.80158	0.00152237	0.0193793	-1.49815
SUMF2	0.188719	0.188719	20.3677	3.61758	0.00225273	0.0250244	-1.88397
SEPTIN2	0.187681	0.187681	23.7784	5.70341	3.04E-05	0.0013103	2.40999
SOAT1	0.187029	0.187029	19.0493	3.62238	0.00222983	0.0248875	-1.87393
PLCD4	0.186673	0.186673	19.1514	6.1985	1.17E-05	0.000691311	3.36593
P4HA1	0.186394	0.186394	20.3393	4.15238	0.000723012	0.0120973	-0.761041
RPAIN	0.186007	0.186007	15.3364	3.17616	0.00575662	0.0468794	-2.79981
HMGB2	0.185659	0.185659	21.6468	5.28869	6.91E-05	0.00241069	1.58515
GDPD2	0.185533	0.185533	18.077	3.55088	0.00259671	0.0275684	-2.02345
ERAP1	0.185396	0.185396	21.0591	8.00007	4.88E-07	5.89E-05	6.55628
DENND2B	0.185078	0.185078	15.8765	4.47544	0.00036644	0.00799042	-0.0846757
TALDO1	0.184322	0.184322	25.3633	5.89122	2.11E-05	0.00102485	2.77646
LRIG1	0.184001	0.184001	19.7564	6.41665	7.80E-06	0.00050352	3.77659
HS1BP3	0.183931	0.183931	20.7517	3.7945	0.00154548	0.019542	-1.51301
SELENOP	0.182339	0.182339	17.8636	3.14299	0.00617478	0.0492102	-2.86772
WARS	0.182294	0.182294	22.4627	3.73573	0.00175148	0.0213164	-1.63636
CYP20A1	0.180718	0.180718	20.3415	5.02246	0.000118371	0.0036086	1.04527
TTC28	0.17922	0.17922	14.4849	3.56324	0.00252924	0.0271361	-1.99763
LAMA2	0.178989	0.178989	22.3021	4.78899	0.000191037	0.00506921	0.566002
UTRN	0.178494	0.178494	21.5979	6.03466	1.60E-05	0.000875852	3.05321
SZRD1	0.177227	0.177227	20.2247	5.43569	5.15E-05	0.0019334	1.87989
SDSL	0.176633	0.176633	19.5641	3.88777	0.0012673	0.0172016	-1.31707
MCL1	0.174376	0.174376	16.5155	3.13766	0.00624471	0.0496415	-2.87862
PTPN12	0.173467	0.173467	20.5597	6.7006	4.63E-06	0.00034076	4.30114
SGPL1	0.172909	0.172909	21.2718	4.80621	0.000184373	0.0049765	0.601524
SORBS1	0.172377	0.172377	24.2454	5.6167	3.60E-05	0.00147532	2.23926
PARVB	0.172203	0.172203	21.326	6.38381	8.30E-06	0.000524451	3.71521
COL6A3	0.172198	0.172198	20.5678	3.65037	0.00210077	0.0241039	-1.81533
REEP3	0.171617	0.171617	18.4794	3.90629	0.00121838	0.0167795	-1.27815
CTC1	0.171587	0.171587	20.0945	3.18766	0.00561819	0.046279	-2.77622
FRMD8	0.171371	0.171371	19.3453	4.73641	0.000212946	0.00549575	0.457412
NFKB1	0.170702	0.170702	19.7411	5.70163	3.05E-05	0.0013103	2.40649
RSU1	0.170308	0.170308	23.3445	4.78065	0.000194351	0.00511394	0.548796
KIF13A	0.169975	0.169975	17.8724	4.12375	0.000768154	0.0126195	-0.821166
CRTAP	0.169348	0.169348	15.0753	3.80701	0.00150487	0.0192086	-1.48675
GOLIM4	0.168544	0.168544	17.7263	3.39059	0.00365252	0.0350455	-2.35728
SEC11A	0.168071	0.168071	20.6698	4.07908	0.000844349	0.0133243	-0.915002
GBP7	0.166846	0.166846	18.3378	3.86967	0.00131703	0.0177488	-1.3551
PARP12	0.166788	0.166788	18.5702	4.60133	0.000281807	0.00658714	0.177415
RASSF2	0.165637	0.165637	19.3945	4.56435	0.000304365	0.00690872	0.100525
KIAA2013	0.164397	0.164397	17.7266	5.49887	4.54E-05	0.00175455	2.00578
TNS3	0.164298	0.164298	22.1823	4.50657	0.00034336	0.00761046	-0.0197827
EIF4E3	0.163859	0.163859	17.6541	4.05797	0.000882981	0.0138167	-0.959365
ITPKC	0.163361	0.163361	17.9148	4.79451	0.000188875	0.00504712	0.577389
ILK	0.163045	0.163045	22.9175	4.30345	0.000525695	0.00998397	-0.444218
ALDH1A7	0.162354	0.162354	23.0606	4.3405	0.000486281	0.00948399	-0.36664
IRGM1	0.161942	0.161942	21.0048	7.06033	2.43E-06	0.000208804	4.94931
NIBAN2	0.161077	0.161077	22.1679	4.26807	0.000566357	0.0105233	-0.518342
PXN	0.160207	0.160207	19.9039	3.4113	0.00349517	0.0340834	-2.31428
ARAP1	0.15969	0.15969	19.8578	6.21775	1.13E-05	0.00067939	3.40245
PLEKHA7	0.159172	0.159172	20.6925	4.79181	0.000189927	0.00505399	0.571832
VCL	0.15774	0.15774	25.3215	5.03716	0.00011488	0.00353146	1.07527
SLC20A2	0.157661	0.157661	20.8395	5.53238	4.25E-05	0.0016694	2.07235
SMC6	0.156694	0.156694	16.3305	4.26618	0.000568616	0.0105233	-0.522302
FBLN1	0.156039	0.156039	19.1631	3.32971	0.00415711	0.0381304	-2.48348
KDM3A	0.155118	0.155118	15.9711	3.77992	0.00159419	0.0198762	-1.54362
SUN2	0.15478	0.15478	20.4849	3.2119	0.00533718	0.04469	-2.72645
PPHLN1	0.151803	0.151803	18.1028	3.84859	0.00137743	0.0181403	-1.39939
HM13	0.151579	0.151579	20.8317	3.54522	0.00262818	0.0278174	-2.03526
RDH10	0.151047	0.151047	16.7622	3.91415	0.00119818	0.0165497	-1.26162
HACD2	0.150841	0.150841	21.3453	4.49031	0.000355226	0.00780007	-0.0536771
MYH9	0.150313	0.150313	27.0517	5.76174	2.71E-05	0.00120653	2.52429
CAPN1	0.150098	0.150098	22.9068	6.04102	1.58E-05	0.000875852	3.06542
TMX1	0.149416	0.149416	21.3925	4.62059	0.000270742	0.00639195	0.217422
SDE2	0.14905	0.14905	15.1922	3.26962	0.0047226	0.0410762	-2.60761
STT3A	0.148164	0.148164	22.9161	4.5972	0.00028424	0.00659623	0.168828
RGL1	0.147532	0.147532	18.5062	4.03378	0.000929437	0.0141671	-1.01019
VASP	0.147081	0.147081	21.4488	4.9394	0.000140252	0.00409033	0.875339
STS	0.146782	0.146782	18.3986	3.78144	0.00158904	0.0198524	-1.54043
P4HB	0.144468	0.144468	25.9983	5.24391	7.56E-05	0.00253054	1.49488
TJP1	0.143661	0.143661	24.074	4.74662	0.000208499	0.0054387	0.478516
EZR	0.143046	0.143046	26.5515	3.91697	0.00119104	0.0165105	-1.25571
PRKCSH	0.141985	0.141985	23.6409	4.45267	0.000384326	0.00822806	-0.132198
CAPNS2	0.141954	0.141954	21.1576	3.97126	0.0010613	0.0152819	-1.1416
MAGT1	0.141656	0.141656	20.2028	5.69759	3.07E-05	0.0013103	2.39855
LMAN1	0.141005	0.141005	23.5301	4.2301	0.000613559	0.011009	-0.597948
DNTTIP1	0.140939	0.140939	17.6699	3.53061	0.00271127	0.0285046	-2.06577
MBD2	0.140827	0.140827	20.8297	3.85676	0.00135371	0.0180221	-1.38224
ARID4B	0.140138	0.140138	18.7789	3.29815	0.0044452	0.0396908	-2.54873
CASP6	0.140023	0.140023	19.9118	3.86421	0.00133241	0.0179048	-1.36657
LMNA	0.139063	0.139063	25.2573	3.8428	0.00139451	0.0182423	-1.41157
FMNL3	0.138984	0.138984	20.7542	4.32376	0.000503699	0.00966363	-0.401676
CASP3	0.138649	0.138649	21.1052	4.3276	0.00049965	0.00966093	-0.393641
DNAJC9	0.138461	0.138461	20.9287	3.6778	0.0019815	0.0230157	-1.75785
PDLIM5	0.138425	0.138425	22.1662	3.86026	0.00134365	0.0180045	-1.37487
MAP3K2	0.138147	0.138147	19.5865	3.4658	0.00311247	0.0312811	-2.20091
ADK	0.137698	0.137698	24.2952	5.68938	3.12E-05	0.00131956	2.38242
SIAH1A	0.137361	0.137361	18.539	3.84943	0.00137498	0.0181403	-1.39764
MYO9B	0.136666	0.136666	21.3644	3.85929	0.00134643	0.0180161	-1.37691
JAK1	0.135988	0.135988	21.2726	4.67279	0.000242934	0.00591582	0.325703
SRXN1	0.135654	0.135654	17.5487	3.1478	0.0061123	0.0488362	-2.85788
STAT5A	0.13502	0.13502	20.8583	5.44927	5.01E-05	0.00188946	1.90698
CNPY2	0.134726	0.134726	21.9858	4.30374	0.000525375	0.00998397	-0.443612
LPCAT3	0.134687	0.134687	19.5506	3.98913	0.00102179	0.0148929	-1.10404
FBL	0.134579	0.134579	22.5859	4.84373	0.000170667	0.0047494	0.67883
NUP210	0.134241	0.134241	21.7376	3.94864	0.00111352	0.0157281	-1.18914
ATF1	0.133743	0.133743	19.7068	3.62388	0.00222272	0.0248449	-1.87079
GANAB	0.133085	0.133085	25.1689	5.46965	4.82E-05	0.0018366	1.9476
ERBIN	0.132588	0.132588	23.3157	4.59951	0.000282878	0.00659581	0.173626
NFIA	0.132588	0.132588	20.6312	4.02447	0.000947969	0.0142913	-1.02976
CD2AP	0.13248	0.13248	20.1607	3.86809	0.00132148	0.0177834	-1.35844
CYP4F22	0.132116	0.132116	17.945	4.11202	0.000787463	0.0127726	-0.845805
METTL14	0.131638	0.131638	19.0263	3.39623	0.00360899	0.0348327	-2.34557
PARVA	0.131324	0.131324	22.1025	4.02992	0.000937085	0.0142376	-1.01831
PTTG1IP	0.131012	0.131012	17.827	3.23515	0.00508068	0.0430783	-2.67863
LTA4H	0.130706	0.130706	25.1769	4.40412	0.000425479	0.00882821	-0.233593
TAF5	0.130649	0.130649	18.3781	3.36446	0.00386119	0.036336	-2.41149
CREB1	0.1304	0.1304	19.8377	3.49858	0.00290265	0.0298179	-2.1326
MANF	0.130283	0.130283	22.5627	3.28112	0.00460879	0.0404989	-2.58389
MAP3K3	0.129997	0.129997	18.5689	3.26391	0.00478016	0.0413111	-2.61939
TNS2	0.129617	0.129617	20.174	3.61941	0.00224397	0.0250125	-1.88014
RDX	0.129564	0.129564	25.2452	4.15334	0.00072155	0.0120943	-0.759031
NID1	0.129445	0.129445	23.1873	3.71621	0.00182585	0.0219103	-1.67733
CACHD1	0.128987	0.128987	19.7925	4.931	0.000142684	0.00413564	0.858123
DNAAF5	0.128901	0.128901	18.0914	4.11327	0.000785383	0.0127726	-0.84318
SEC61A1	0.128291	0.128291	22.5406	4.17002	0.000696547	0.01178	-0.724007
TPCN1	0.127994	0.127994	17.5912	4.37288	0.000454299	0.00910532	-0.29889
SLC1A4	0.127747	0.127747	23.5677	3.14813	0.00610799	0.0488362	-2.8572
ERLIN1	0.12744	0.12744	23.1697	5.12205	9.67E-05	0.00304615	1.2481
SNX8	0.127388	0.127388	17.8658	4.04806	0.000901716	0.0139727	-0.98018
HNRNPCL3	0.127028	0.127028	23.837	4.12101	0.000772618	0.0126575	-0.826917
RPRD1B	0.126971	0.126971	20.8895	4.86302	0.000164031	0.00464016	0.718522
RAVER1	0.126943	0.126943	19.6326	3.48842	0.00296612	0.0301511	-2.15377
NASP	0.126876	0.126876	22.2423	3.62689	0.00220853	0.0247671	-1.8645
CPNE3	0.125923	0.125923	21.6567	4.1952	0.000660473	0.0114369	-0.671178
TMED10	0.125666	0.125666	22.9075	4.26481	0.000570259	0.010533	-0.525172
CGNL1	0.125416	0.125416	19.1461	3.13908	0.00622592	0.0495339	-2.87571
PRPF38B	0.125252	0.125252	20.1706	3.99781	0.00100313	0.0147189	-1.08579
SORBS3	0.124663	0.124663	19.6735	3.91426	0.00119791	0.0165497	-1.2614
DAD1	0.124275	0.124275	20.1283	4.32239	0.000505154	0.00967186	-0.404547
ITGA6	0.124264	0.124264	21.5476	4.13883	0.000744031	0.0123394	-0.789493
ANO6	0.124178	0.124178	18.7162	3.79769	0.00153502	0.0194614	-1.50631
NHERF2	0.124038	0.124038	22.6056	4.0134	0.000970491	0.0144424	-1.05302
CERS2	0.123344	0.123344	20.6685	3.40084	0.00357377	0.0345635	-2.336
STAT5B	0.122226	0.122226	21.1191	5.35524	6.05E-05	0.00214168	1.71889
TMED2	0.122161	0.122161	23.0176	5.21109	8.08E-05	0.00266344	1.42858
GSDME	0.122057	0.122057	21.898	3.19915	0.00548326	0.0456293	-2.75264
BCAP31	0.12158	0.12158	25.075	4.71645	0.000221924	0.00558962	0.416122
DBNDD2	0.120602	0.120602	18.5411	3.38332	0.00370944	0.0353673	-2.37237
MYDGF	0.12057	0.12057	23.1125	3.44676	0.00324117	0.0322047	-2.24054
PAK1IP1	0.120568	0.120568	20.1489	3.50491	0.00286379	0.0295953	-2.1194
TMEM67	0.120493	0.120493	17.4964	3.18682	0.00562822	0.046279	-2.77795
PLEKHF2	0.120418	0.120418	18.0788	3.14846	0.00610378	0.0488362	-2.85653
YY1	0.120292	0.120292	19.6549	3.89803	0.00123997	0.016992	-1.29552
MICAL1	0.120283	0.120283	21.3602	3.94867	0.00111344	0.0157281	-1.18907
PDIA3	0.120199	0.120199	26.0508	3.81141	0.00149083	0.019081	-1.47749
SH3PXD2B	0.120192	0.120192	19.7798	3.15399	0.00603291	0.0484484	-2.84522
CASP7	0.119974	0.119974	17.5573	3.47658	0.00304185	0.0308062	-2.17845
CAPNS1	0.119604	0.119604	23.5299	4.39222	0.000436232	0.00891655	-0.258463
METTL1	0.119502	0.119502	18.4468	4.57356	0.000298582	0.00683024	0.119678
FMNL2	0.118318	0.118318	23.0712	4.95774	0.000135087	0.00399466	0.912925
HMBS	0.11813	0.11813	20.9843	3.69224	0.00192151	0.0225975	-1.7276
USP20	0.118049	0.118049	19.0821	4.24254	0.000597679	0.0108064	-0.571877
TMOD3	0.117975	0.117975	21.9374	3.93906	0.00113643	0.0159303	-1.20928
RNASEH2A	0.116963	0.116963	17.7851	3.43311	0.00333666	0.0329815	-2.26893
RELA	0.116861	0.116861	19.4459	3.84506	0.00138783	0.018208	-1.40682
ABCD1	0.116526	0.116526	19.8649	3.71854	0.00181682	0.0218576	-1.67244
FAM107B	0.116046	0.116046	18.7449	3.48827	0.0029671	0.0301511	-2.1541
RNF213	0.115809	0.115809	20.1889	5.53476	4.23E-05	0.00166852	2.07707
NUMA1	0.115569	0.115569	24.2857	4.04994	0.000898124	0.0139727	-0.976222
SNTA1	0.114693	0.114693	24.3396	3.28685	0.00455312	0.0402653	-2.57207
RCC2	0.114047	0.114047	23.8109	4.11421	0.000783824	0.0127726	-0.841208
CALU	0.114045	0.114045	23.9898	4.13626	0.000748084	0.0123631	-0.794887
NADK	0.114008	0.114008	19.3819	3.62994	0.0021942	0.0246691	-1.8581
DOCK1	0.113301	0.113301	22.6415	4.34973	0.000476942	0.00935999	-0.347332
SSR1	0.11307	0.11307	21.239	4.60447	0.000279973	0.00656055	0.183936
COMT	0.112999	0.112999	22.1795	4.20127	0.000652059	0.0113328	-0.658436
ARID1A	0.112751	0.112751	21.6159	3.32024	0.00424152	0.0387162	-2.50306
NUP88	0.112646	0.112646	20.9036	3.9859	0.00102882	0.0149184	-1.11083
NOP58	0.111925	0.111925	21.7304	4.37757	0.00044985	0.00907014	-0.289087
TMED7	0.111777	0.111777	21.8069	4.01816	0.000960738	0.0143653	-1.04301
SCAF4	0.110985	0.110985	22.121	4.66951	0.000244589	0.00593822	0.318918
TFEB	0.110768	0.110768	17.7835	3.24898	0.00493394	0.0419853	-2.65017
ADAM17	0.110765	0.110765	20.1314	3.17018	0.00582985	0.0473016	-2.81206
HNMT	0.110554	0.110554	22.845	3.49717	0.00291138	0.0298179	-2.13554
BRD2	0.110538	0.110538	20.1886	4.43136	0.000401866	0.00852607	-0.176688
ARPC5	0.110264	0.110264	24.7736	4.17886	0.000683665	0.0117093	-0.705465
TMCC3	0.110053	0.110053	20.4496	3.38005	0.00373534	0.0355064	-2.37916
SSR4	0.110006	0.110006	20.7191	3.92699	0.00116594	0.0162178	-1.23465
IWS1	0.109862	0.109862	20.9022	3.15214	0.00605652	0.0485553	-2.849
STK4	0.109859	0.109859	21.545	4.02714	0.000942615	0.0142761	-1.02414
NUP43	0.109774	0.109774	18.3273	3.3225	0.00422122	0.0385683	-2.49838
CARMIL1	0.10955	0.10955	22.258	6.67864	4.82E-06	0.000351906	4.26099
IFIH1	0.10919	0.10919	17.164	3.23739	0.00505658	0.0429126	-2.67402
CPSF4	0.108544	0.108544	18.388	4.00014	0.000998199	0.0146922	-1.0809
PHF8	0.108235	0.108235	17.7046	4.05981	0.000879548	0.0137859	-0.955503
NEK6	0.108119	0.108119	20.302	4.02154	0.000953884	0.0143083	-1.03592
TMED9	0.107379	0.107379	23.4804	3.48143	0.00301061	0.0305603	-2.16835
TINAGL1	0.1072	0.1072	21.5913	4.37547	0.00045184	0.00907533	-0.293483
OPLAH	0.107181	0.107181	23.4754	3.28474	0.00457354	0.0403775	-2.57642
REL	0.107066	0.107066	18.2368	3.83174	0.00142773	0.0185251	-1.43481
VCAM1	0.107056	0.107056	23.0891	3.22799	0.00515829	0.0434426	-2.69336
BMPR1B	0.106665	0.106665	19.0111	3.77775	0.00160157	0.0199297	-1.54818
GAR1	0.106664	0.106664	20.7847	4.77232	0.000197723	0.00517856	0.53159
EOGT	0.106297	0.106297	19.2902	4.07903	0.000844436	0.0133243	-0.915104
PAPOLA	0.105394	0.105394	20.8267	3.8334	0.00142268	0.0184851	-1.43131
GTF3C3	0.105248	0.105248	19.7814	3.42947	0.00336265	0.0331911	-2.27651
TPD52L2	0.104954	0.104954	24.2043	3.94023	0.00113361	0.0159144	-1.20683
NEK9	0.104904	0.104904	21.7094	4.05539	0.00088781	0.0138693	-0.964772
IL1RAP	0.104347	0.104347	22.1319	3.60129	0.00233228	0.025696	-1.91806
FARP1	0.103904	0.103904	24.6125	4.3463	0.000480393	0.00940812	-0.354511
NOP56	0.103765	0.103765	23.1035	5.03626	0.000115091	0.00353146	1.07343
PDS5B	0.103388	0.103388	22.9472	3.33376	0.00412144	0.037991	-2.47508
HNRNPC	0.102569	0.102569	25.4737	3.72377	0.00179666	0.0216982	-1.66146
IRF3	0.102341	0.102341	20.536	3.22771	0.00516141	0.0434426	-2.69394
STN1	0.102061	0.102061	20.0147	3.15669	0.00599846	0.0482541	-2.83968
SMC3	0.101685	0.101685	23.7857	3.74126	0.001731	0.0211491	-1.62478
SVIL	0.101454	0.101454	18.6108	3.19215	0.00556508	0.0461822	-2.76701
ERLIN2	0.101292	0.101292	23.9352	4.23856	0.000602711	0.0108765	-0.580212
PGGHG	0.101267	0.101267	19.4992	3.35168	0.00396752	0.0369309	-2.43798
WDR33	0.100133	0.100133	19.6842	3.92777	0.00116401	0.0162178	-1.23301
TBC1D9B	0.099721	0.099721	23.8277	3.58924	0.00239297	0.0261303	-1.94328
SELENOF	0.0995856	0.0995856	20.8159	4.95706	0.000135276	0.00399466	0.911526
MAPK14	0.0995795	0.0995795	19.7594	4.14376	0.000736313	0.0122762	-0.779141
RPN1	0.0992234	0.0992234	25.3171	3.83733	0.00141084	0.018377	-1.42306
KRI1	0.0989764	0.0989764	18.2437	4.2177	0.000629825	0.0111522	-0.623958
LUC7L2	0.0989514	0.0989514	22.6057	4.2358	0.000606225	0.010919	-0.585992
C5ORF30	0.0988916	0.0988916	17.5265	3.67159	0.00200791	0.0232652	-1.77087
PLCB3	0.0988742	0.0988742	22.3664	3.34483	0.00402571	0.037325	-2.45217
CDC42EP4	0.0988471	0.0988471	22.3161	4.48109	0.00036214	0.00793338	-0.0729029
PCDHGC3	0.0988084	0.0988084	18.712	3.18813	0.0056126	0.046279	-2.77525
UGGT2	0.0986653	0.0986653	19.4351	3.20086	0.00546338	0.045504	-2.74912
STAG2	0.0981927	0.0981927	21.0959	3.47615	0.00304465	0.0308062	-2.17935
GTF3C5	0.0981481	0.0981481	19.3068	3.84901	0.0013762	0.0181403	-1.39851
PGD	0.0979361	0.0979361	25.1143	4.41476	0.000416093	0.00871021	-0.211364
PFN1	0.0973157	0.0973157	25.4704	4.57331	0.000298732	0.00683024	0.119174
FNDC3A	0.097266	0.097266	21.1182	4.62458	0.000268506	0.00637172	0.225705
DOCK6	0.0963949	0.0963949	20.6891	3.51002	0.00283278	0.0294535	-2.10873
ANKRD13A	0.096089	0.096089	20.5662	3.3229	0.0042176	0.0385683	-2.49755
MORF4L2	0.0957082	0.0957082	18.5391	3.398	0.00359541	0.0347372	-2.34189
PTER	0.0955169	0.0955169	19.3034	3.62987	0.00219456	0.0246691	-1.85826
SRP9	0.0948891	0.0948891	21.6351	3.27809	0.00463855	0.0406089	-2.59015
STAT6	0.094709	0.094709	19.8022	3.71343	0.0018367	0.0219881	-1.68316
CDC73	0.094684	0.094684	21.2844	3.18279	0.00567637	0.0465373	-2.7862
DDOST	0.0946078	0.0946078	23.3348	3.90031	0.00123397	0.0169528	-1.29072
NHLRC2	0.0943079	0.0943079	22.1133	4.12326	0.00076896	0.0126195	-0.822208
G6PD	0.0940139	0.0940139	23.4511	4.17092	0.000695235	0.01178	-0.722135
XRN2	0.0937852	0.0937852	22.3439	3.63877	0.00215333	0.024439	-1.83962
UGGT1	0.0936381	0.0936381	24.3921	4.17978	0.000682337	0.0117093	-0.703533
F11R	0.0935319	0.0935319	19.5134	3.19174	0.00556988	0.0461822	-2.76784
ARHGEF10	0.0934447	0.0934447	20.9467	3.30179	0.004411	0.0396351	-2.54121
SFPQ	0.0931429	0.0931429	25.7501	3.23028	0.00513341	0.043367	-2.68866
GHDC	0.09294	0.09294	19.0171	3.52053	0.00277009	0.0289293	-2.08681
BAZ1B	0.0922741	0.0922741	21.8664	3.68117	0.00196735	0.0229267	-1.7508
EPRS	0.0918167	0.0918167	23.7805	3.23226	0.00511183	0.0432646	-2.68457
SMARCA5	0.0917727	0.0917727	22.6065	3.85123	0.00136972	0.0181219	-1.39385
MYL6	0.0917579	0.0917579	23.9965	4.78555	0.000192398	0.00507672	0.558901
HNRNPA1	0.0917508	0.0917508	26.3053	3.45278	0.00319989	0.031965	-2.22801
TLE3	0.0916014	0.0916014	20.8203	3.62374	0.00222338	0.0248449	-1.87109
SERPINB6	0.0909426	0.0909426	24.1972	4.24931	0.0005892	0.0106752	-0.557669
SOD2	0.0907865	0.0907865	25.4497	3.7127	0.00183956	0.0219881	-1.68469
GSR	0.090491	0.090491	23.4704	3.70134	0.0018846	0.0222845	-1.70851
EP300	0.0904831	0.0904831	19.8365	4.85742	0.000165932	0.00465201	0.706991
CHD1	0.0901462	0.0901462	19.6791	3.70738	0.0018605	0.0221008	-1.69583
LSM2	0.0894859	0.0894859	21.0592	3.55417	0.00257859	0.0274467	-2.01658
RBM6	0.0893755	0.0893755	20.667	3.71216	0.00184168	0.0219881	-1.68582
ZNF207	0.0879865	0.0879865	21.8259	4.11293	0.000785956	0.0127726	-0.843903
HNRNPA1L2	0.0873995	0.0873995	25.2198	3.30158	0.00441299	0.0396351	-2.54165
PLEC	0.0872199	0.0872199	28.5564	3.72673	0.00178539	0.0216452	-1.65525
KIF1C	0.0870713	0.0870713	22.5888	3.42915	0.00336492	0.0331911	-2.27717
RPP38	0.0865243	0.0865243	18.5298	3.59068	0.0023856	0.0261303	-1.94025
BRD7	0.0862306	0.0862306	17.5938	3.37267	0.0037944	0.0358998	-2.39447
ZHX3	0.0858649	0.0858649	18.8254	3.36621	0.00384685	0.0362373	-2.40786
MTMR10	0.0857434	0.0857434	19.8051	3.33188	0.00413799	0.0380127	-2.47898
ARPIN	0.0854154	0.0854154	22.5459	4.67443	0.00024211	0.00591582	0.329099
RPN2	0.0853216	0.0853216	23.5481	3.84746	0.00138074	0.0181403	-1.40177
CIAO2B	0.0848084	0.0848084	18.2211	3.55689	0.00256367	0.0273622	-2.01089
CIAO1	0.0847716	0.0847716	19.9025	3.28235	0.00459673	0.0404404	-2.58134
SEC63	0.0837011	0.0837011	21.5898	4.36821	0.000458784	0.00917568	-0.308675
CMAS	0.0835159	0.0835159	23.2198	3.57118	0.00248682	0.0267724	-1.98103
RER1	0.0831202	0.0831202	20.4013	3.63447	0.00217316	0.0245752	-1.84863
ZMPSTE24	0.0827671	0.0827671	22.3448	3.1664	0.00587664	0.0474994	-2.8198
SMC1A	0.0826638	0.0826638	23.5593	3.50856	0.00284161	0.0294801	-2.11178
TRIM56	0.0819391	0.0819391	18.5021	3.40091	0.0035733	0.0345635	-2.33587
DKC1	0.0816139	0.0816139	21.7246	3.75855	0.0016684	0.0205736	-1.58848
PYCR3	0.0813739	0.0813739	21.7028	3.42736	0.00337779	0.0332484	-2.2809
HNRNPF	0.0813633	0.0813633	23.1099	3.3557	0.00393373	0.0367441	-2.42964
PRPF4	0.0803133	0.0803133	21.472	3.5145	0.00280593	0.0292387	-2.0994
NUP93	0.0791356	0.0791356	23.3583	3.61545	0.00226302	0.0250796	-1.88845
UBXN7	0.0783727	0.0783727	22.2116	3.7005	0.00188796	0.0222865	-1.71026
HNRNPU	0.0783275	0.0783275	26.9035	3.15536	0.00601547	0.0483496	-2.84242
SRP54	0.0780464	0.0780464	23.1158	3.49021	0.00295486	0.0300917	-2.15005
RAD21	0.0779173	0.0779173	21.2019	3.64292	0.00213435	0.024282	-1.83092
DDX46	0.0775384	0.0775384	23.2207	3.95282	0.00110368	0.0156813	-1.18036
PCYT1A	0.0774956	0.0774956	20.9598	3.20998	0.00535893	0.0448322	-2.73039
FAM98B	0.0763538	0.0763538	23.5347	3.25761	0.00484447	0.041519	-2.63238
TLE1	0.0762773	0.0762773	21.9327	3.28373	0.00458332	0.0404259	-2.5785
WDR3	0.075137	0.075137	18.9228	3.43436	0.00332786	0.0329637	-2.26635
TLE4	0.0749466	0.0749466	21.0026	3.19339	0.00555049	0.0461073	-2.76446
CXXC1	0.0746841	0.0746841	18.6882	3.30091	0.00441923	0.0396351	-2.54302
MOGS	0.0737686	0.0737686	21.9084	3.63762	0.00215858	0.0244691	-1.84202
RBM39	0.0735977	0.0735977	22.5567	3.38739	0.00367748	0.0351875	-2.36393
EEF1A1	0.0731938	0.0731938	28.2601	3.29237	0.00450008	0.0399913	-2.56067
MTREX	0.0729624	0.0729624	21.8118	3.29984	0.00442928	0.0396351	-2.54523
SUPT16H	0.0729615	0.0729615	23.2899	3.31657	0.00427471	0.0389061	-2.51065
NUP155	0.0726002	0.0726002	22.4995	3.52597	0.00273821	0.0286668	-2.07546
LSM8	0.0719767	0.0719767	20.025	3.18131	0.0056942	0.0465393	-2.78924
NUP54	0.0718032	0.0718032	21.7569	3.28224	0.00459784	0.0404404	-2.58158
FBLL1	0.0703666	0.0703666	22.0031	3.65137	0.00209627	0.0240815	-1.81322
ADD3	0.0701562	0.0701562	25.2115	3.79133	0.00155595	0.0195949	-1.51967
CPSF6	0.069823	0.069823	21.1165	3.42796	0.00337346	0.0332405	-2.27965
NUP205	0.068917	0.068917	22.0021	3.45919	0.00315658	0.0315993	-2.21468
ERO1A	0.0688531	0.0688531	22.4664	3.31121	0.00432365	0.0391623	-2.52173
FABP5	0.0686553	0.0686553	23.8004	3.1816	0.00569068	0.0465393	-2.78864
NEK7	0.0686105	0.0686105	21.6985	3.2997	0.00443055	0.0396351	-2.54551
PIK3R1	0.0679869	0.0679869	22.3819	3.47313	0.00306426	0.0309051	-2.18564
SEC23IP	0.0676734	0.0676734	23.7752	3.5765	0.00245881	0.0265619	-1.96991
ACTN1	0.067232	0.067232	27.2667	3.33281	0.00412981	0.037991	-2.47706
ACTN4	0.0669053	0.0669053	26.9158	3.57588	0.00246203	0.0265662	-1.9712
SMARCC2	0.0650454	0.0650454	24.4181	3.14648	0.00612936	0.0488895	-2.86058
APEH	0.0641389	0.0641389	23.3957	3.50753	0.00284787	0.0295125	-2.11394
CPSF1	0.0638271	0.0638271	21.5583	3.49926	0.00289844	0.0298179	-2.13118
GOLGA5	0.0627385	0.0627385	21.177	3.37943	0.00374025	0.0355173	-2.38044
ADAM10	0.0618684	0.0618684	22.2163	3.16889	0.00584579	0.0473902	-2.8147
SMPD2	0.061482	0.061482	19.5285	3.56621	0.0025133	0.0270266	-1.99142
NAT10	0.060485	0.060485	21.1046	3.46244	0.00313476	0.0314477	-2.20789
RUVBL1	0.0593911	0.0593911	23.4866	3.20676	0.0053956	0.0450385	-2.73701
ACTL6A	0.0579759	0.0579759	22.5466	3.46956	0.00308763	0.0311074	-2.19307
DST	0.056456	0.056456	26.3428	3.18666	0.00563011	0.046279	-2.77827
HIP1	0.0531802	0.0531802	23.878	3.28045	0.00461531	0.0405184	-2.58526
BBS1	0.0525456	0.0525456	20.2136	3.27986	0.00462112	0.0405316	-2.58649
KIF1A	0.045405	-0.045405	25.0028	-3.17511	0.00576941	0.0469325	-2.80196
ARFGEF2	0.0454063	-0.0454063	24.0101	-3.41226	0.00348805	0.0340834	-2.31229
FYN	0.0469761	-0.0469761	23.3331	-3.38009	0.00373499	0.0355064	-2.37907
WDR48	0.0478383	-0.0478383	23.4754	-3.22503	0.00519075	0.043619	-2.69945
CKAP5	0.0486399	-0.0486399	25.9633	-3.16696	0.00586967	0.0474994	-2.81865
GDI2	0.0493576	-0.0493576	26.8673	-3.64741	0.00211406	0.0241682	-1.82153
RAB14	0.0517172	-0.0517172	24.8811	-3.3366	0.00409671	0.0378715	-2.46922
ZFYVE1	0.0530638	-0.0530638	22.6445	-3.16418	0.00590433	0.0476188	-2.82436
SLC3A2	0.0532292	-0.0532292	24.7351	-3.19113	0.00557712	0.0461822	-2.7691
LARP1	0.053507	-0.053507	23.334	-3.9864	0.00102772	0.0149184	-1.10977
VCPIP1	0.0535353	-0.0535353	23.4044	-3.27154	0.00470343	0.040987	-2.60366
CCNY	0.0545057	-0.0545057	22.052	-3.25285	0.00489361	0.0417931	-2.64219
USP46	0.0545417	-0.0545417	21.9607	-3.45201	0.00320516	0.0319837	-2.22962
DMXL1	0.0545633	-0.0545633	23.2855	-3.41562	0.0034632	0.0339473	-2.3053
WASHC2	0.0548795	-0.0548795	23.1225	-3.15911	0.00596787	0.0480901	-2.83472
ARHGAP35	0.0551046	-0.0551046	23.9465	-3.49517	0.00292378	0.0299012	-2.1397
HECTD4	0.0551145	-0.0551145	23.213	-3.18395	0.00566244	0.0464636	-2.78382
TNIK	0.0551599	-0.0551599	25.4077	-3.68092	0.00196837	0.0229267	-1.75131
MAP4K3	0.0557612	-0.0557612	21.7927	-3.20706	0.00539218	0.0450385	-2.7364
CAMK2D	0.0558979	-0.0558979	26.5432	-3.5118	0.00282209	0.0293747	-2.10503
SOS1	0.0560831	-0.0560831	22.8808	-3.37203	0.00379959	0.0358998	-2.3958
RAB2A	0.0566446	-0.0566446	24.6836	-3.86222	0.00133807	0.0179552	-1.37076
GALNT17	0.057231	-0.057231	19.4473	-3.50947	0.00283611	0.0294556	-2.10988
YKT6	0.0574512	-0.0574512	23.7853	-3.39143	0.00364602	0.0350455	-2.35554
IQSEC1	0.0575239	-0.0575239	24.8314	-3.58734	0.00240264	0.0261349	-1.94723
EIF4H	0.0578758	-0.0578758	23.3378	-3.52591	0.00273853	0.0286668	-2.07558
RAB2B	0.0584133	-0.0584133	24.4138	-3.81761	0.0014713	0.0189081	-1.46448
PPM1A	0.0584256	-0.0584256	24.7231	-3.70113	0.00188543	0.0222845	-1.70894
GABBR1	0.058594	-0.058594	23.4088	-3.38715	0.00367937	0.0351875	-2.36443
NT5C3B	0.0587962	-0.0587962	21.8172	-3.71076	0.00184715	0.0219976	-1.68874
UQCR10	0.059385	-0.059385	22.0225	-3.22917	0.00514542	0.0433929	-2.69093
DLG1	0.0604225	-0.0604225	25.3147	-3.40641	0.00353173	0.0342843	-2.32444
PTPRA	0.0605031	-0.0605031	24.5478	-3.7555	0.00167928	0.0206467	-1.59488
DLGAP1	0.0606431	-0.0606431	24.7162	-3.78723	0.00156958	0.0196877	-1.52828
ERC2	0.0608649	-0.0608649	25.3199	-3.2628	0.00479136	0.0413321	-2.62167
AGAP3	0.0610154	-0.0610154	22.9193	-4.08939	0.000826104	0.0131311	-0.893334
UBE2V1	0.0610875	-0.0610875	23.6723	-3.68272	0.00196086	0.0229267	-1.74754
SCYL2	0.0621291	-0.0621291	22.9439	-3.5453	0.00262774	0.0278174	-2.0351
ATP2B4	0.0621467	-0.0621467	26.5913	-3.24941	0.00492945	0.041985	-2.64928
RAB1B	0.062674	-0.062674	25.0952	-3.96423	0.00107726	0.0154457	-1.15638
MAPK9	0.0638838	-0.0638838	24.4374	-3.15269	0.00604951	0.0485403	-2.84788
TNNC2	0.0645035	-0.0645035	26.3095	-3.18924	0.0055994	0.046279	-2.77297
NCK2	0.0648856	-0.0648856	22.3446	-3.30723	0.00436034	0.0393934	-2.52996
PPFIA3	0.0650619	-0.0650619	25.0699	-4.21006	0.000640062	0.0112465	-0.639982
HMOX2	0.0651067	-0.0651067	23.0775	-3.38645	0.00368485	0.0352042	-2.36588
XKR4	0.0651119	-0.0651119	21.1926	-3.25724	0.00484829	0.041519	-2.63315
RAB8A	0.0651239	-0.0651239	24.3961	-3.7386	0.00174083	0.0212143	-1.63036
CAMK2A	0.0653714	-0.0653714	26.9337	-4.28394	0.00054774	0.0102783	-0.485092
ASNS	0.0654361	-0.0654361	23.3664	-4.14591	0.00073298	0.0122423	-0.774637
RAPGEF4	0.065442	-0.065442	24.124	-3.27812	0.00463817	0.0406089	-2.59007
NF1	0.0655341	-0.0655341	24.8399	-3.25555	0.00486569	0.0416302	-2.63663
GOT1	0.0658233	-0.0658233	26.981	-3.2172	0.00527764	0.0442307	-2.71556
PIP4K2A	0.0659173	-0.0659173	23.8494	-3.18821	0.00561163	0.046279	-2.77508
RAC3	0.0663121	-0.0663121	22.6649	-3.46699	0.00310456	0.0312446	-2.19842
BRAP	0.0663221	-0.0663221	20.2664	-3.28965	0.00452612	0.0401469	-2.56628
KIF3C	0.0666823	-0.0666823	22.4572	-4.04485	0.000907873	0.0140199	-0.986925
HID1	0.0667325	-0.0667325	21.9401	-3.76984	0.00162879	0.0201884	-1.56479
RAB1A	0.0669514	-0.0669514	25.5186	-4.38234	0.000445373	0.00903877	-0.279123
CEP97	0.0669683	-0.0669683	19.6545	-3.1822	0.00568351	0.0465393	-2.78742
ABLIM2	0.0669765	-0.0669765	24.0171	-3.33453	0.00411473	0.037991	-2.47349
RAB8B	0.0677657	-0.0677657	24.365	-3.62428	0.00222083	0.0248449	-1.86996
PAFAH1B2	0.0683934	-0.0683934	21.6488	-3.58625	0.00240824	0.0261355	-1.94952
GNA11	0.0684652	-0.0684652	25.5007	-3.72143	0.00180566	0.0217789	-1.66638
RAB39B	0.0691455	-0.0691455	23.3406	-3.73247	0.00176369	0.0214373	-1.64321
RUFY3	0.0692055	-0.0692055	25.1973	-3.46544	0.00311482	0.0312811	-2.20165
AP2A2	0.0693771	-0.0693771	27.1553	-3.5965	0.00235625	0.0258513	-1.92809
WWP1	0.0697532	-0.0697532	21.0791	-4.17301	0.000692172	0.01178	-0.717749
ACAD9	0.069755	-0.069755	24.0763	-3.87051	0.00131469	0.0177426	-1.35334
RAB22A	0.0699267	-0.0699267	22.4087	-4.74545	0.000209003	0.0054387	0.476101
C2CD4C	0.0699915	-0.0699915	21.0354	-3.36174	0.00388356	0.0364737	-2.41712
DGKE	0.0704464	-0.0704464	22.6098	-3.63087	0.00218987	0.0246691	-1.85616
CKB	0.0707889	-0.0707889	28.9704	-3.68137	0.00196649	0.0229267	-1.75037
PPA2	0.0708957	-0.0708957	23.6034	-3.59628	0.00235735	0.0258513	-1.92855
CIAPIN1	0.0709003	-0.0709003	22.3391	-3.22737	0.00516514	0.0434426	-2.69464
ATP2B3	0.0709352	-0.0709352	25.7492	-3.53279	0.00269872	0.0284044	-2.06123
PACS1	0.0710172	-0.0710172	24.9665	-3.26003	0.00481968	0.0414447	-2.62739
SLC6A7	0.0710935	-0.0710935	20.365	-3.1793	0.00571848	0.0466628	-2.79337
AP3D1	0.0712594	-0.0712594	25.0424	-3.75136	0.00169415	0.0207527	-1.60357
CDK5	0.0715851	-0.0715851	23.8869	-3.61892	0.00224634	0.0250125	-1.88118
CLYBL	0.0716412	-0.0716412	22.6101	-3.40768	0.00352221	0.0342662	-2.3218
GNB1	0.0725073	-0.0725073	26.198	-3.39467	0.003621	0.0349128	-2.34882
PPP2R5C	0.0725776	-0.0725776	23.4807	-3.3	0.0044278	0.0396351	-2.54491
SNX4	0.0726201	-0.0726201	22.5883	-3.64908	0.00210654	0.0241406	-1.81803
DGKD	0.0727093	-0.0727093	21.7216	-3.18792	0.00561516	0.046279	-2.77569
AK1	0.0728679	-0.0728679	24.7041	-3.29857	0.00444125	0.0396908	-2.54786
RAB30	0.0731393	-0.0731393	23.083	-3.68078	0.00196897	0.0229267	-1.7516
INPP5A	0.0733339	-0.0733339	23.0865	-4.09446	0.000817283	0.0130488	-0.882684
AAK1	0.0735509	-0.0735509	24.6378	-3.26162	0.00480338	0.0413978	-2.6241
RAB6B	0.0736322	-0.0736322	24.8844	-4.54437	0.000317309	0.00715084	0.0589524
PTPA	0.0739297	-0.0739297	25.0911	-3.7115	0.00184427	0.0219912	-1.68721
CUL1	0.0740117	-0.0740117	24.0363	-3.55483	0.00257494	0.0274388	-2.01519
CAMK2G	0.0740292	-0.0740292	26.0847	-4.19949	0.000654515	0.0113546	-0.662173
RAB37	0.0740751	-0.0740751	22.4948	-3.25015	0.00492163	0.0419564	-2.64774
BRSK2	0.0741279	-0.0741279	24.2353	-3.44593	0.00324688	0.0322047	-2.24226
THNSL1	0.0741487	-0.0741487	22.6578	-3.27484	0.00467058	0.040782	-2.59684
RAB6D	0.0741738	-0.0741738	22.428	-4.44309	0.000392111	0.00835297	-0.152191
AMIGO1	0.0742254	-0.0742254	21.3231	-3.50025	0.00289232	0.0298093	-2.12911
ACVR1B	0.074304	-0.074304	20.2394	-3.92944	0.00115988	0.0162178	-1.22949
PKM	0.0745397	-0.0745397	29.157	-3.49311	0.00293666	0.0299493	-2.144
AP1B1	0.0747172	-0.0747172	27.9441	-3.58897	0.00239433	0.0261303	-1.94383
SNX30	0.0749551	-0.0749551	22.7192	-4.26108	0.000574764	0.0105624	-0.532999
PCLO	0.0750178	-0.0750178	26.9309	-3.58797	0.00239944	0.0261303	-1.94593
ATP6V1B2	0.0750608	-0.0750608	26.887	-3.81564	0.00147748	0.0189617	-1.46862
DLG4	0.0750844	-0.0750844	25.7758	-4.4267	0.000405805	0.00854216	-0.186412
DCTN3	0.0757484	-0.0757484	24.1651	-3.73173	0.00176647	0.0214435	-1.64476
GK	0.0757603	-0.0757603	24.4995	-3.68832	0.00193758	0.0227581	-1.73579
SRGAP2	0.0758003	-0.0758003	24.5133	-4.22247	0.000623521	0.0111242	-0.613958
STX17	0.0762615	-0.0762615	21.2106	-3.9733	0.00105671	0.0152438	-1.13731
RAB6A	0.0764909	-0.0764909	24.9009	-4.86104	0.0001647	0.00464514	0.714447
MRPS18B	0.0765422	-0.0765422	20.3575	-3.33988	0.00406826	0.0376825	-2.46242
CSNK1E	0.0767777	-0.0767777	23.1734	-4.70134	0.000228978	0.00570627	0.384839
MARK4	0.0771061	-0.0771061	22.3055	-4.09513	0.000816139	0.0130488	-0.881294
DCTN1	0.0771151	-0.0771151	26.4096	-3.92645	0.00116727	0.0162178	-1.23577
PTPN11	0.0771945	-0.0771945	25.376	-4.0008	0.000996799	0.0146922	-1.07951
PURA	0.0771979	-0.0771979	25.9633	-4.5503	0.000313409	0.00707988	0.0712969
CASK	0.0775918	-0.0775918	24.4609	-4.02285	0.000951233	0.0142913	-1.03316
MTX3	0.0776107	-0.0776107	20.2602	-3.26288	0.00479064	0.0413321	-2.62152
NMT2	0.0776501	-0.0776501	22.105	-3.85145	0.00136907	0.0181219	-1.39338
PRKCE	0.0777003	-0.0777003	25.5444	-3.28763	0.00454557	0.0402437	-2.57045
MAPK10	0.0777234	-0.0777234	24.2133	-3.99055	0.00101872	0.0148858	-1.10106
2025-09-05	0.0778357	-0.0778357	25.3479	-3.22151	0.00522961	0.0439063	-2.70669
STK39	0.0778571	-0.0778571	23.2165	-3.4781	0.00303203	0.0307446	-2.17529
RWDD4	0.0778842	-0.0778842	19.7674	-3.28233	0.00459697	0.0404404	-2.58139
GRIN2A	0.0779671	-0.0779671	23.1985	-3.57979	0.00244159	0.0264365	-1.96302
CSNK1G3	0.0779766	-0.0779766	23.3591	-3.95372	0.00110158	0.0156813	-1.17847
DNAJC6	0.0780294	-0.0780294	25.6915	-3.82558	0.00144655	0.0186409	-1.44774
PLCD3	0.0781456	-0.0781456	18.9859	-3.31829	0.00425912	0.0388187	-2.50709
DCUN1D2	0.0785169	-0.0785169	21.427	-3.41955	0.00343438	0.0336998	-2.29714
RHEB	0.0786137	-0.0786137	24.469	-3.45296	0.00319865	0.031965	-2.22763
PTPRS	0.0787863	-0.0787863	24.2777	-4.29637	0.00053359	0.0100841	-0.459052
MAPK8	0.0789165	-0.0789165	23.5948	-4.15534	0.000718513	0.0120649	-0.754842
RAB26	0.0790274	-0.0790274	22.7488	-3.75184	0.00169242	0.0207527	-1.60257
RAB33B	0.0790444	-0.0790444	23.0926	-4.20896	0.00064155	0.0112465	-0.64229
ACBD6	0.0791912	-0.0791912	22.4567	-3.64683	0.00211664	0.0241682	-1.82273
PPIA	0.0793319	-0.0793319	27.6232	-3.38104	0.00372746	0.0355032	-2.3771
GPD1L	0.0794254	-0.0794254	25.7739	-3.66471	0.00203756	0.0235797	-1.78529
GDI1	0.079771	-0.079771	27.1557	-4.85763	0.00016586	0.00465201	0.707422
CSNK1G1	0.0797865	-0.0797865	22.3225	-3.95644	0.00109523	0.0156555	-1.17275
CAMK2B	0.0798268	-0.0798268	27.7903	-4.03644	0.000924216	0.0141104	-1.00461
TPGS1	0.080393	-0.080393	19.1906	-3.37481	0.00377718	0.0358319	-2.39003
TOLLIP	0.0805971	-0.0805971	22.907	-3.19096	0.00557912	0.0461822	-2.76945
SLC25A11	0.0806323	-0.0806323	24.5755	-3.25903	0.00482988	0.0414745	-2.62945
SLC12A6	0.0806503	-0.0806503	24.3054	-3.87305	0.0013076	0.0176723	-1.348
PTPN9	0.0807398	-0.0807398	22.3725	-4.81244	0.00018202	0.0049413	0.614376
GGT7	0.0810741	-0.0810741	23.2547	-3.57748	0.00245367	0.0265368	-1.96786
ATP6V1A	0.0813209	-0.0813209	27.3599	-3.89449	0.00124933	0.0170068	-1.30295
STRADA	0.0813503	-0.0813503	21.7877	-4.59115	0.00028784	0.00666204	0.156262
OTUB1	0.0814672	-0.0814672	25.3058	-3.39231	0.0036392	0.0350166	-2.35371
PTGES2	0.081587	-0.081587	23.1697	-3.32882	0.00416495	0.0381652	-2.48531
MAP1A	0.0820312	-0.0820312	27.3952	-3.84792	0.00137941	0.0181403	-1.40081
DIP2A	0.0820512	-0.0820512	23.5644	-3.38514	0.00369511	0.0352664	-2.36859
RAB31	0.082329	-0.082329	22.2593	-3.29659	0.00445994	0.0397847	-2.55195
SCAMP1	0.0824072	-0.0824072	24.5411	-4.19229	0.000664535	0.0114861	-0.677269
MAP4K2	0.0825596	-0.0825596	21.5174	-3.95324	0.00110269	0.0156813	-1.17947
TTC39C	0.0826524	-0.0826524	21.6555	-3.2598	0.00482201	0.0414447	-2.62787
CSNK1D	0.0833323	-0.0833323	23.1313	-4.82382	0.000177807	0.00485489	0.637813
ADCY8	0.0834333	-0.0834333	21.695	-4.09228	0.000821074	0.0130872	-0.887275
DYNLL2	0.0836081	-0.0836081	24.542	-4.16789	0.000699702	0.011791	-0.728496
AP2B1	0.0836679	-0.0836679	27.3658	-3.85124	0.0013697	0.0181219	-1.39384
GNAZ	0.0837165	-0.0837165	25.4747	-3.68415	0.00195489	0.0229043	-1.74454
DEPDC5	0.0837431	-0.0837431	20.4401	-3.60501	0.00231387	0.0255231	-1.91027
PLCB4	0.0839675	-0.0839675	23.1529	-3.50334	0.00287339	0.0296465	-2.12267
LIAS	0.0840503	-0.0840503	19.8097	-3.29152	0.00450823	0.0400259	-2.56243
WWC1	0.0842871	-0.0842871	21.9185	-4.09687	0.000813132	0.0130488	-0.877633
DIP2B	0.0843143	-0.0843143	24.6143	-5.20752	8.13E-05	0.00266344	1.42135
HPCAL1	0.0843504	-0.0843504	25.6116	-3.42303	0.003409	0.0334856	-2.28989
PGAM4	0.0847531	-0.0847531	23.381	-3.5627	0.00253214	0.0271362	-1.99875
EVL	0.0851577	-0.0851577	23.1045	-4.45461	0.000382764	0.00822806	-0.128138
SBF1	0.085179	-0.085179	24.5748	-4.09534	0.000815767	0.0130488	-0.880842
CASTOR2	0.0857144	-0.0857144	19.7063	-3.719	0.00181502	0.0218576	-1.67147
CLMN	0.0857361	-0.0857361	22.9265	-3.33307	0.00412755	0.037991	-2.47652
NSUN6	0.085926	-0.085926	19.4007	-3.54174	0.00264773	0.0279301	-2.04253
RAB9A	0.0861802	-0.0861802	21.6663	-4.51084	0.00034031	0.00756066	-0.010882
ELFN2	0.0863603	-0.0863603	22.5251	-3.16541	0.00588894	0.0475354	-2.82183
TTC9	0.0865404	-0.0865404	21.7381	-4.13922	0.000743417	0.0123394	-0.788674
ABAT	0.0867856	-0.0867856	26.2118	-4.39978	0.000429371	0.00884824	-0.242666
SLC8A1	0.0868058	-0.0868058	25.4693	-3.26503	0.00476878	0.0412506	-2.61707
CAMK1D	0.0868949	-0.0868949	23.4547	-3.25856	0.00483472	0.0414782	-2.63042
EML5	0.087018	-0.087018	21.5247	-4.72508	0.000217997	0.00553485	0.433972
SLC25A46	0.0873748	-0.0873748	22.9237	-3.68694	0.0019433	0.0227969	-1.73869
ACTR10	0.0873933	-0.0873933	22.8967	-3.3727	0.00379414	0.0358998	-2.3944
HPRT1	0.087644	-0.087644	24.7758	-3.33936	0.00407269	0.0376864	-2.46348
ALDH5A1	0.08776	-0.08776	25.58	-4.36416	0.000462699	0.00919115	-0.317138
PLCB2	0.0880053	-0.0880053	21.2156	-3.4136	0.0034781	0.0340579	-2.3095
CLTCL1	0.0880916	-0.0880916	26.4929	-3.59848	0.00234631	0.0257916	-1.92395
GNAI2	0.088113	-0.088113	26.2966	-3.39328	0.00363172	0.0349803	-2.3517
TMEFF2	0.0882301	-0.0882301	20.509	-3.35682	0.00392443	0.0367441	-2.42733
GAK	0.0883182	-0.0883182	24.5282	-4.36341	0.000463427	0.00919115	-0.318703
SNAP91	0.0885986	-0.0885986	25.7891	-3.30649	0.00436719	0.0394051	-2.53149
CHP1	0.088647	-0.088647	22.7493	-4.20722	0.000643915	0.0112465	-0.645947
SCRN1	0.088684	-0.088684	24.051	-3.79376	0.00154791	0.019542	-1.51457
RTN1	0.088742	-0.088742	25.6415	-3.40733	0.00352483	0.0342662	-2.32253
ISCA1	0.0889288	-0.0889288	21.181	-3.80403	0.00151445	0.0193047	-1.49301
STMN3	0.0889729	-0.0889729	22.2542	-3.18745	0.0056207	0.046279	-2.77665
BRSK1	0.0889987	-0.0889987	24.1317	-4.04057	0.000916152	0.0140824	-0.995922
RAB4B	0.0891198	-0.0891198	23.5206	-4.55906	0.000307735	0.00696843	0.0895315
GGCT	0.0891723	-0.0891723	21.3586	-4.37676	0.000450618	0.00907014	-0.290786
PIN1	0.0891789	-0.0891789	23.1977	-3.30708	0.00436171	0.0393934	-2.53027
RGS7	0.0897659	-0.0897659	24.2629	-3.74935	0.00170142	0.0208148	-1.6078
RALB	0.0897821	-0.0897821	22.955	-4.42686	0.000405668	0.00854216	-0.186075
SYT7	0.0897951	-0.0897951	23.7687	-3.90896	0.00121149	0.016709	-1.27255
LYSMD1	0.0899507	-0.0899507	20.8776	-4.03988	0.000917497	0.0140824	-0.997377
ATP6V1B1	0.0902916	-0.0902916	24.3575	-4.35893	0.00046781	0.00924488	-0.328078
ANO8	0.0903405	-0.0903405	20.932	-3.85249	0.00136606	0.0181219	-1.39121
AP2A1	0.0911626	-0.0911626	27.7194	-3.98034	0.00104103	0.0150406	-1.12251
CACNG2	0.0912376	-0.0912376	21.5799	-3.34501	0.00402414	0.037325	-2.45179
OXCT2	0.0912643	-0.0912643	21.7197	-3.26731	0.00474585	0.0411278	-2.61239
RGS6	0.0912906	-0.0912906	24.4763	-4.01149	0.00097444	0.0144783	-1.05704
ATP6V1D	0.0914761	-0.0914761	24.8317	-3.87973	0.00128917	0.0174733	-1.33398
CYRIB	0.0918158	-0.0918158	24.7941	-3.29463	0.00447855	0.0398752	-2.556
TYRO3	0.0920385	-0.0920385	21.6574	-3.91665	0.00119184	0.0165105	-1.25638
OXCT1	0.0924331	-0.0924331	25.5983	-3.35392	0.00394868	0.0368283	-2.43334
NPRL2	0.0924692	-0.0924692	19.7753	-3.58405	0.00241954	0.0262279	-1.95412
DYNC1I1	0.0926435	-0.0926435	23.5666	-4.25891	0.000577404	0.0105624	-0.537557
CLTC	0.0928427	-0.0928427	29.0461	-4.00816	0.000981342	0.0145266	-1.06403
ANK1	0.092847	-0.092847	24.683	-3.3157	0.00428261	0.0389403	-2.51245
NRAS	0.0934057	-0.0934057	23.8852	-4.0367	0.000923695	0.0141104	-1.00405
SLC9A1	0.0935873	-0.0935873	22.3526	-3.16617	0.00587943	0.0474994	-2.82026
ATP6V1F	0.094586	-0.094586	23.9223	-4.22564	0.000619367	0.0110921	-0.607313
CYP4X1	0.0946297	-0.0946297	20.0898	-3.77964	0.00159516	0.0198762	-1.54422
SLC12A5	0.0949748	-0.0949748	25.3621	-4.02042	0.000956156	0.0143195	-1.03828
ATP1A2	0.0950448	-0.0950448	29.3856	-4.78714	0.000191767	0.00507429	0.562187
RASAL1	0.0953086	-0.0953086	24.5083	-3.28649	0.00455656	0.0402653	-2.5728
SPAG1	0.0953113	-0.0953113	20.4606	-3.49471	0.00292663	0.0299012	-2.14065
CMC2	0.0956699	-0.0956699	19.8233	-3.89018	0.00126084	0.0171387	-1.31202
CYSTM1	0.095695	-0.095695	19.615	-3.27153	0.00470349	0.040987	-2.60367
PTGFRN	0.0957681	-0.0957681	21.435	-3.17906	0.0057214	0.0466628	-2.79386
AP2M1	0.0961273	-0.0961273	26.4844	-3.90008	0.00123457	0.0169528	-1.2912
PPP4R4	0.0961669	-0.0961669	21.6238	-3.76566	0.00164336	0.0203155	-1.57357
RAP1GDS1	0.0967056	-0.0967056	24.9744	-4.95727	0.000135217	0.00399466	0.911958
WDR7	0.0968383	-0.0968383	25.471	-4.49387	0.000352593	0.00777852	-0.0462557
SYN2	0.0969594	-0.0969594	26.619	-3.40189	0.00356584	0.0345578	-2.33383
SERPINI1	0.0974948	-0.0974948	21.2129	-4.21164	0.000637931	0.0112442	-0.636668
ATP6V1C1	0.0975768	-0.0975768	25.5354	-4.67629	0.000241177	0.00591582	0.332958
PEBP1	0.0977335	-0.0977335	26.297	-3.35176	0.0039668	0.0369309	-2.4378
ARHGAP27	0.097836	-0.097836	18.9338	-3.25124	0.00491032	0.0418978	-2.6455
GNG3	0.0978877	-0.0978877	23.082	-3.74037	0.00173428	0.0211619	-1.62665
MCRIP1	0.0982508	-0.0982508	20.8246	-3.35768	0.00391724	0.0367441	-2.42555
EML6	0.0983194	-0.0983194	21.2891	-3.53568	0.00268216	0.0282617	-2.05519
CKMT1	0.0985483	-0.0985483	26.2822	-3.49294	0.0029377	0.0299493	-2.14435
DMXL2	0.0986988	-0.0986988	26.9267	-4.25573	0.000581278	0.0105912	-0.544207
CKMT1A	0.0988506	-0.0988506	26.167	-3.4458	0.00324782	0.0322047	-2.24255
MTMR2	0.0988528	-0.0988528	22.1776	-3.99905	0.00100051	0.0147032	-1.08319
MAP1LC3A	0.0991822	-0.0991822	22.7218	-3.20379	0.00542959	0.0452626	-2.7431
PPIAL4H	0.0993617	-0.0993617	25.2605	-4.57611	0.000296996	0.00682367	0.124992
GRM4	0.0994054	-0.0994054	21.5574	-3.40765	0.0035224	0.0342662	-2.32186
NRBF2	0.0994519	-0.0994519	20.8129	-4.21631	0.000631679	0.011164	-0.62688
NCALD	0.0995343	-0.0995343	24.7705	-3.70832	0.00185679	0.0220845	-1.69387
PPIAL4C	0.0996533	-0.0996533	25.2509	-4.61039	0.000276547	0.00649644	0.196232
SARDH	0.099765	-0.099765	21.7181	-3.7128	0.00183917	0.0219881	-1.68448
IMPACT	0.10009	-0.10009	22.9079	-4.03136	0.000934229	0.0142172	-1.01529
SEZ6	0.100133	-0.100133	20.1939	-3.27073	0.00471146	0.0410185	-2.60532
TOM1L2	0.10016	-0.10016	23.727	-5.76072	2.72E-05	0.00120653	2.5223
NAPG	0.100417	-0.100417	26.9031	-3.82766	0.00144017	0.0186096	-1.44337
NECAP1	0.100485	-0.100485	25.1857	-3.59846	0.00234643	0.0257916	-1.92399
CEND1	0.100487	-0.100487	24.6631	-3.5186	0.00278153	0.0290166	-2.09084
ADCY2	0.100693	-0.100693	22.7402	-5.3996	5.54E-05	0.00205286	1.80776
KRAS	0.101063	-0.101063	23.6079	-4.72389	0.000218535	0.00553485	0.431507
ROGDI	0.101074	-0.101074	23.2092	-4.26699	0.000567649	0.0105233	-0.52061
PIP4K2C	0.101307	-0.101307	23.6754	-3.26065	0.0048133	0.0414447	-2.62611
GDAP1L1	0.101493	-0.101493	22.3384	-3.81265	0.00148691	0.0190568	-1.4749
MAP1B	0.102027	-0.102027	27.7632	-4.08777	0.00082895	0.013146	-0.896745
PEX5L	0.102078	-0.102078	23.8345	-3.23385	0.00509472	0.0431585	-2.68131
AMPH	0.102246	-0.102246	26.4898	-3.27526	0.0046664	0.040782	-2.59597
PRNP	0.102633	-0.102633	23.7513	-3.29493	0.00447571	0.0398752	-2.55538
HPCA	0.102732	-0.102732	24.8874	-3.58662	0.00240633	0.0261355	-1.94874
DMAC2L	0.102755	-0.102755	21.2699	-3.14867	0.00610112	0.0488362	-2.85611
KCNC1	0.102923	-0.102923	20.7065	-3.17049	0.00582597	0.0473016	-2.81141
SLC12A2	0.103011	-0.103011	24.273	-3.49705	0.00291215	0.0298179	-2.1358
ATP6V1E1	0.103812	-0.103812	26.5665	-4.38147	0.000446181	0.00903877	-0.28093
DPP6	0.104666	-0.104666	26.0845	-3.36696	0.00384074	0.036216	-2.40631
KCNF1	0.104689	-0.104689	17.2305	-3.56034	0.00254491	0.0272112	-2.00369
MAP7D2	0.105169	-0.105169	24.0664	-4.20664	0.000644702	0.0112465	-0.647161
SYT3	0.105345	-0.105345	23.2924	-3.89542	0.00124687	0.0170068	-1.301
FANCM	0.105572	-0.105572	18.6344	-3.94084	0.00113212	0.0159144	-1.20553
UNC119	0.105587	-0.105587	19.7424	-4.03967	0.000917899	0.0140824	-0.997811
PITPNA	0.105588	-0.105588	24.7872	-4.06727	0.000865742	0.0135921	-0.939814
SSTR2	0.105775	-0.105775	19.5207	-3.30152	0.00441354	0.0396351	-2.54177
KCNQ2	0.105904	-0.105904	23.2742	-4.1754	0.00068868	0.0117738	-0.712725
MTSS2	0.105993	-0.105993	20.9792	-4.11183	0.000787781	0.0127726	-0.846206
HINT3	0.10639	-0.10639	21.9554	-4.04799	0.00090185	0.0139727	-0.980327
ARSB	0.107202	-0.107202	23.5026	-3.21841	0.00526408	0.0441564	-2.71306
FAM210B	0.107403	-0.107403	20.0165	-3.8368	0.00141242	0.018377	-1.42416
KCNQ3	0.107479	-0.107479	21.3853	-3.26849	0.0047339	0.0410998	-2.60994
LANCL2	0.108018	-0.108018	23.7431	-3.67954	0.00197417	0.0229588	-1.7542
HRAS	0.108282	-0.108282	24.2882	-4.69857	0.000230292	0.00571338	0.379119
GNG2	0.10891	-0.10891	23.6855	-3.37142	0.0038045	0.0359102	-2.39706
GNAO1	0.109067	-0.109067	27.1035	-3.78648	0.0015721	0.019693	-1.52986
GNG4	0.110207	-0.110207	19.2966	-3.23077	0.00512804	0.0433628	-2.68764
OXR1	0.11037	-0.11037	25.1718	-3.80998	0.00149538	0.0191132	-1.4805
RAB3B	0.110378	-0.110378	24.503	-4.0983	0.000810669	0.0130316	-0.874622
TTYH3	0.110525	-0.110525	19.4627	-3.30012	0.00442669	0.0396351	-2.54466
NRG3	0.110857	-0.110857	18.6406	-5.20702	8.14E-05	0.00266344	1.42035
SANBR	0.110888	-0.110888	20.7182	-3.92789	0.0011637	0.0162178	-1.23275
GNAI1	0.111199	-0.111199	25.3637	-3.79015	0.00155987	0.0195998	-1.52216
CARMIL2	0.111519	-0.111519	23.375	-3.55667	0.00256485	0.0273622	-2.01134
KCTD12	0.111662	-0.111662	23.1734	-3.4114	0.00349441	0.0340834	-2.31407
KCNC2	0.111907	-0.111907	19.5839	-3.31809	0.00426099	0.0388187	-2.50752
RTN3	0.11196	-0.11196	25.571	-4.46523	0.000374355	0.00811621	-0.105988
BASP1	0.112045	-0.112045	26.0158	-4.17923	0.000683129	0.0117093	-0.704685
STK25	0.112154	-0.112154	21.758	-4.0389	0.000919394	0.0140824	-0.999424
RALA	0.112397	-0.112397	23.8238	-4.69707	0.000231008	0.00571338	0.376015
CLTA	0.11248	-0.11248	27.0283	-3.80058	0.00152562	0.0193945	-1.50025
TTC9B	0.112676	-0.112676	20.5998	-3.35656	0.00392657	0.0367441	-2.42787
ATP6V1G2	0.112867	-0.112867	24.0384	-4.65651	0.000251276	0.00606929	0.291963
AIFM3	0.112923	-0.112923	22.5003	-3.50584	0.00285815	0.0295866	-2.11747
RAB27B	0.11317	-0.11317	21.1201	-4.25886	0.000577455	0.0105624	-0.537644
CADPS2	0.113197	-0.113197	25.3049	-6.23232	1.10E-05	0.000665232	3.43004
NELL2	0.113328	-0.113328	21.6783	-3.55347	0.00258241	0.0274563	-2.01803
PREPL	0.113479	-0.113479	24.193	-3.87425	0.00130427	0.0176526	-1.34549
NSF	0.113577	-0.113577	28.4949	-4.44319	0.000392024	0.00835297	-0.151971
PLSCR3	0.113646	-0.113646	20.3698	-4.05413	0.000890192	0.0138835	-0.967428
THY1	0.114269	-0.114269	23.2193	-4.67603	0.000241306	0.00591582	0.332422
ARFGAP1	0.114293	-0.114293	23.2018	-3.97068	0.00106259	0.0152819	-1.14281
SEZ6L	0.114351	-0.114351	21.5384	-4.2679	0.000566566	0.0105233	-0.518709
KIAA1671	0.114355	-0.114355	21.0043	-4.65498	0.000252079	0.0060707	0.288775
ADAM22	0.114386	-0.114386	25.054	-3.60571	0.00231045	0.0255152	-1.90882
PALM2	0.115007	-0.115007	23.8058	-3.63482	0.0021715	0.0245752	-1.84788
EPB41L3	0.115125	-0.115125	26.9794	-3.79323	0.00154967	0.019542	-1.51569
ARHGAP1	0.115384	-0.115384	24.835	-4.62453	0.000268532	0.00637172	0.225607
KCNK10	0.116256	-0.116256	16.5403	-3.40611	0.00353398	0.0342843	-2.32506
MPI	0.116497	-0.116497	23.3191	-4.30862	0.000520003	0.00991585	-0.433383
NDRG3	0.116848	-0.116848	22.7947	-4.79938	0.000186985	0.00503258	0.587449
SLC25A18	0.117608	-0.117608	24.7188	-5.38664	5.68E-05	0.00209016	1.78181
SV2B	0.11822	-0.11822	25.5646	-3.60669	0.00230565	0.0255152	-1.90678
CCDC136	0.118466	-0.118466	22.4483	-3.95596	0.00109635	0.0156555	-1.17376
DHCR7	0.119055	-0.119055	20.0826	-3.85648	0.00135453	0.0180221	-1.38283
DGKQ	0.119076	-0.119076	22.45	-5.12722	9.57E-05	0.00303469	1.25861
LRRTM1	0.11979	-0.11979	21.6205	-4.49707	0.000350238	0.0077447	-0.0395702
GALNS	0.120094	-0.120094	19.8094	-4.29585	0.000534176	0.0100841	-0.460144
DAAM2	0.120141	-0.120141	22.8989	-4.40509	0.000424608	0.00882821	-0.231553
ATP1A1	0.120554	-0.120554	29.2604	-5.57649	3.90E-05	0.00156947	2.15979
SNCG	0.12086	-0.12086	24.2969	-3.49853	0.00290293	0.0298179	-2.13269
TRIM66	0.120934	-0.120934	17.7861	-3.95573	0.00109688	0.0156555	-1.17424
TMX2	0.122101	-0.122101	22.8411	-4.62163	0.000270158	0.00639195	0.219577
TPD52L1	0.122238	-0.122238	20.0768	-3.66175	0.00205042	0.0236703	-1.79148
ZDHHC20	0.122404	-0.122404	19.8182	-3.69389	0.00191474	0.022546	-1.72412
DOC2A	0.123506	-0.123506	22.5341	-3.5505	0.0025988	0.0275684	-2.02424
STXBP1	0.123706	-0.123706	27.3231	-4.01668	0.000963772	0.0143878	-1.04614
PRKCG	0.125058	-0.125058	25.6308	-4.8324	0.000174692	0.00481168	0.6555
ATP1A4	0.125205	-0.125205	28.2778	-5.51718	4.38E-05	0.00169907	2.04217
RAB3D	0.125326	-0.125326	24.4822	-6.48469	6.88E-06	0.000459606	3.90332
SYT5	0.125452	-0.125452	25.5337	-4.2768	0.000556041	0.0103927	-0.500057
TNFAIP8L3	0.126058	-0.126058	21.748	-3.52753	0.00272912	0.0286603	-2.07221
PACSIN1	0.126493	-0.126493	26.6597	-4.27771	0.000554971	0.0103927	-0.498141
RGS17	0.126869	-0.126869	22.4096	-5.18949	8.44E-05	0.0027309	1.38487
PURG	0.126964	-0.126964	23.2911	-5.71675	2.96E-05	0.00129137	2.43617
TLNRD1	0.127042	-0.127042	19.6261	-3.70513	0.00186947	0.0221793	-1.70057
GPT	0.127239	-0.127239	21.7701	-3.49722	0.00291107	0.0298179	-2.13543
GLUD2	0.127287	-0.127287	26.238	-4.64636	0.00025663	0.00615129	0.270897
CADM3	0.127351	-0.127351	24.889	-4.91883	0.000146284	0.00422698	0.833168
SCAMP5	0.127794	-0.127794	23.6682	-5.35201	6.09E-05	0.00214747	1.71242
SYNGR1	0.127828	-0.127828	21.3961	-5.001	0.000123665	0.00375782	1.00143
ENOPH1	0.128065	-0.128065	21.4742	-3.98491	0.00103099	0.0149184	-1.11291
PLCL1	0.128279	-0.128279	23.7321	-4.32541	0.000501956	0.00966093	-0.398224
SYNGR3	0.128552	-0.128552	21.9418	-5.59456	3.76E-05	0.00152767	2.19553
PITPNC1	0.128797	-0.128797	23.2648	-3.82573	0.0014461	0.0186409	-1.44743
GNG13	0.128828	-0.128828	23.063	-4.3295	0.000497657	0.00964595	-0.389663
GLUD1	0.128916	-0.128916	27.6398	-4.97102	0.000131471	0.00391916	0.940106
HSPA12A	0.130594	-0.130594	26.7436	-4.10266	0.000803222	0.0129339	-0.865466
RNF141	0.130609	-0.130609	20.5097	-7.18184	1.96E-06	0.000181026	5.16409
ATP6V0D1	0.130794	-0.130794	25.3089	-6.11853	1.37E-05	0.000779927	3.21375
TMEM150C	0.131022	-0.131022	17.617	-4.58704	0.000290311	0.00670276	0.147726
ATP1A3	0.131027	-0.131027	29.6747	-5.72938	2.89E-05	0.0012658	2.46094
ITCH	0.131252	-0.131252	22.0319	-3.77639	0.00160623	0.0199614	-1.55104
CNTN1	0.131443	-0.131443	26.9219	-4.37943	0.000448097	0.00905811	-0.285198
CAPN5	0.131504	-0.131504	22.9028	-6.49293	6.78E-06	0.000455897	3.91862
SLC32A1	0.131521	-0.131521	24.602	-4.73665	0.000212842	0.00549575	0.457899
NAGA	0.131934	-0.131934	21.8424	-4.16916	0.000697819	0.0117804	-0.725819
FAHD2	0.13205	-0.13205	22.7988	-5.16834	8.80E-05	0.00281665	1.34203
APLP1	0.132363	-0.132363	22.8232	-3.63166	0.00218617	0.0246631	-1.8545
TMEM163	0.132649	-0.132649	20.1721	-3.24796	0.00494459	0.042038	-2.65226
SH3GLB2	0.132796	-0.132796	24.0141	-6.35363	8.78E-06	0.000551116	3.65864
GSTM5	0.132854	-0.132854	25.0605	-3.41206	0.00348955	0.0340834	-2.3127
NAT8L	0.133196	-0.133196	20.9202	-3.92786	0.00116379	0.0162178	-1.23282
NAPB	0.133224	-0.133224	25.5714	-6.00883	1.68E-05	0.000876305	3.00359
LGALSLB	0.133488	-0.133488	21.659	-3.22988	0.00513775	0.043367	-2.68948
RELL2	0.134009	-0.134009	18.6877	-3.70391	0.00187429	0.0222086	-1.70311
SYT1	0.134139	-0.134139	27.1584	-5.96839	1.82E-05	0.000918754	2.9257
KCNA2	0.134612	-0.134612	23.2848	-3.17605	0.00575791	0.0468794	-2.80003
CLSTN1	0.134809	-0.134809	23.3332	-4.4763	0.000365783	0.00799042	-0.0828857
ARFIP2	0.134858	-0.134858	22.7858	-3.63247	0.00218243	0.0246505	-1.85282
ACAA2	0.13499	-0.13499	24.3993	-3.32735	0.00417797	0.0382473	-2.48835
SVIP	0.135728	-0.135728	21.6391	-3.89509	0.00124774	0.0170068	-1.30169
PGM2L1	0.136291	-0.136291	24.73	-4.3586	0.000468132	0.00924488	-0.328765
CNTNAP1	0.136321	-0.136321	25.4019	-3.14104	0.0062003	0.0493718	-2.87171
ATP12A	0.136353	-0.136353	26.8025	-5.55731	4.05E-05	0.00161166	2.12179
NT5C3A	0.136936	-0.136936	22.7156	-4.22116	0.000625241	0.0111338	-0.616696
PLEKHD1	0.137198	-0.137198	18.1535	-3.31041	0.00433102	0.0391914	-2.52339
CADPS	0.137595	-0.137595	27.3467	-6.85296	3.52E-06	0.000275933	4.57791
SH3GL1	0.137922	-0.137922	24.2623	-5.77772	2.63E-05	0.00117951	2.55553
SLC6A1	0.138056	-0.138056	23.2276	-5.25449	7.40E-05	0.00250778	1.51623
PRRT2	0.138462	-0.138462	23.479	-3.61586	0.00226103	0.0250796	-1.88758
PLPPR2	0.13856	-0.13856	18.8182	-3.45046	0.00321572	0.0320551	-2.23283
FAHD2A	0.138688	-0.138688	22.2592	-5.4658	4.85E-05	0.00184321	1.93994
ATP4A	0.138781	-0.138781	26.6015	-5.37077	5.86E-05	0.00209334	1.75003
SYN1	0.139078	-0.139078	28.3279	-5.3711	5.86E-05	0.00209334	1.75069
CLEC2L	0.139882	-0.139882	21.5872	-3.42539	0.00339194	0.0333529	-2.28499
RAP1B	0.13996	-0.13996	24.2602	-6.03368	1.61E-05	0.000875852	3.05133
LDLR	0.140193	-0.140193	18.25	-3.34855	0.00399402	0.0371042	-2.44447
SPOCK1	0.140549	-0.140549	21.0591	-3.27477	0.00467131	0.040782	-2.59699
RAB3A	0.140674	-0.140674	25.9809	-5.82001	2.42E-05	0.00110444	2.63804
MVK	0.141236	-0.141236	20.8852	-4.21918	0.000627864	0.0111384	-0.620858
GPCPD1	0.141301	-0.141301	23.0975	-6.07124	1.49E-05	0.000833113	3.12336
RAB3C	0.141676	-0.141676	24.9008	-6.94504	2.98E-06	0.000242031	4.74358
RELN	0.141917	-0.141917	20.2158	-6.13834	1.32E-05	0.00075786	3.25154
ATP6V0A1	0.14323	-0.14323	25.7592	-5.6978	3.07E-05	0.0013103	2.39896
SH3GL2	0.144279	-0.144279	26.0757	-5.17197	8.74E-05	0.0028099	1.34939
NTNG1	0.144337	-0.144337	21.5761	-4.10277	0.000803034	0.0129339	-0.865234
TECPR1	0.145393	-0.145393	23.1154	-4.23239	0.00061061	0.010977	-0.593158
KBTBD3	0.145938	-0.145938	20.4829	-4.45333	0.00038379	0.00822806	-0.130806
STX1B	0.146505	-0.146505	26.1812	-3.33162	0.00414023	0.0380127	-2.47951
SLC30A3	0.147157	-0.147157	22.9707	-3.78996	0.00156049	0.0195998	-1.52255
CBARP	0.14722	-0.14722	21.8121	-4.1844	0.000675704	0.0116364	-0.693829
SETD7	0.147265	-0.147265	22.3435	-4.17215	0.000693431	0.01178	-0.719553
TSPAN7	0.148608	-0.148608	20.5594	-4.21114	0.000638605	0.0112442	-0.637718
ALPL	0.150855	-0.150855	20.592	-3.15824	0.00597894	0.0481381	-2.83652
PRCP	0.151724	-0.151724	19.3991	-3.43367	0.00333269	0.0329769	-2.26777
SMPDL3A	0.15286	-0.15286	19.4163	-4.25008	0.000588243	0.0106752	-0.556053
VAMP2	0.153086	-0.153086	24.6758	-4.49033	0.000355212	0.00780007	-0.0536367
FSCN1	0.153293	-0.153293	26.5537	-7.51557	1.10E-06	0.000113863	5.74325
ACAT2	0.154858	-0.154858	23.758	-4.35109	0.00047558	0.00935999	-0.344484
SLC17A7	0.155938	-0.155938	24.8376	-4.15887	0.000713169	0.0119965	-0.747429
SYPL1	0.156643	-0.156643	22.1111	-4.56785	0.00030215	0.006875	0.107818
QDPR	0.157049	-0.157049	24.6616	-3.54259	0.00264294	0.0279109	-2.04075
ACAN	0.157659	-0.157659	23.299	-3.44812	0.00323179	0.0321473	-2.23771
VAMP3	0.157908	-0.157908	24.2077	-4.11014	0.000790602	0.0127963	-0.849752
RGS19	0.158151	-0.158151	22.3865	-5.08476	0.000104284	0.00325282	1.17228
GM2A	0.158169	-0.158169	21.2132	-3.71785	0.00181946	0.0218614	-1.67387
SV2A	0.158744	-0.158744	25.0524	-7.02763	2.57E-06	0.000216834	4.89115
CTSL	0.159573	-0.159573	21.5008	-4.35022	0.000476452	0.00935999	-0.346307
SYT2	0.161229	-0.161229	25.7456	-5.85494	2.26E-05	0.00106599	2.70602
ATP1B1	0.161431	-0.161431	27.7203	-6.02098	1.65E-05	0.000875852	3.02693
BIN1	0.162184	-0.162184	27.0398	-4.10361	0.000801613	0.0129339	-0.863476
PPP1R3G	0.162303	-0.162303	19.6485	-3.288	0.00454198	0.0402437	-2.56968
PNKD	0.162543	-0.162543	21.8593	-5.45259	4.98E-05	0.00188457	1.91361
LHFPL2	0.162581	-0.162581	18.4174	-4.04887	0.000900175	0.0139727	-0.978483
SH3GL3	0.162789	-0.162789	23.2611	-5.41045	5.42E-05	0.00201692	1.82946
SHISA4	0.163606	-0.163606	20.6932	-5.10394	0.000100303	0.0031448	1.21129
DOC2B	0.163994	-0.163994	22.9784	-4.38325	0.000444518	0.00903877	-0.277208
RAP1A	0.164286	-0.164286	24.2389	-5.92202	1.99E-05	0.000980978	2.8361
AGL	0.165763	-0.165763	23.4308	-3.39048	0.00365336	0.0350455	-2.3575
CPLX1	0.165954	-0.165954	25.0652	-4.53696	0.000322254	0.00724495	0.0435172
CPLX2	0.167435	-0.167435	24.6493	-4.07504	0.000851608	0.013415	-0.923492
SYP	0.167688	-0.167688	24.5459	-7.36311	1.43E-06	0.000140277	5.48061
PTPRZ1	0.169033	-0.169033	25.2211	-5.8715	2.19E-05	0.00104841	2.73819
MVD	0.170876	-0.170876	20.1629	-4.42262	0.00040929	0.00858688	-0.194934
FDFT1	0.17159	-0.17159	19.6532	-3.63953	0.00214985	0.024429	-1.83804
SHD	0.171677	-0.171677	20.7279	-4.31261	0.000515663	0.00985303	-0.425041
ALDH3B1	0.171749	-0.171749	21.8737	-4.86456	0.000163513	0.00463944	0.721689
EVA1A	0.173429	-0.173429	19.1894	-4.0891	0.000826615	0.0131311	-0.893947
GRM3	0.173861	-0.173861	24.9922	-3.77238	0.00161999	0.0201058	-1.55945
VAMP1	0.175757	-0.175757	24.0419	-4.44223	0.00039282	0.00835297	-0.153994
ATP1B3	0.176218	-0.176218	23.8444	-4.89998	0.000152047	0.00435345	0.794474
FXYD7	0.17779	-0.17779	20.7028	-4.0231	0.00095073	0.0142913	-1.03264
SMPD1	0.179941	-0.179941	21.2107	-4.33641	0.000490482	0.00954617	-0.375205
DNAJC5	0.179947	-0.179947	23.7813	-5.85364	2.27E-05	0.00106599	2.7035
NUDT17	0.184128	-0.184128	18.4175	-3.31256	0.00431124	0.0390874	-2.51893
OPALIN	0.185142	-0.185142	19.3133	-3.26577	0.0047613	0.0412238	-2.61555
PALM3	0.185508	-0.185508	20.4499	-3.54306	0.00264031	0.0279109	-2.03978
GYS1	0.186135	-0.186135	21.0812	-3.94858	0.00111366	0.0157281	-1.18926
NDNF	0.186171	-0.186171	15.2004	-3.37205	0.00379939	0.0358998	-2.39575
CSF1R	0.186303	-0.186303	18.4662	-3.84221	0.00139625	0.0182423	-1.4128
SNCB	0.186554	-0.186554	26.7611	-6.14014	1.31E-05	0.00075786	3.25496
RPH3A	0.188222	-0.188222	25.1699	-4.12944	0.000758963	0.0125209	-0.809219
IGSF1	0.191689	-0.191689	20.7227	-4.29375	0.000536536	0.0101083	-0.46453
TNR	0.191815	-0.191815	26.5444	-5.84967	2.29E-05	0.00106653	2.69578
CMTM4	0.192485	-0.192485	21.2722	-6.99816	2.71E-06	0.000226017	4.8386
SLC6A9	0.192786	-0.192786	22.5933	-3.83084	0.00143045	0.0185349	-1.43669
SLC6A8	0.194053	-0.194053	20.7945	-4.32487	0.000502532	0.00966093	-0.399367
GPR139	0.194269	-0.194269	20.5626	-4.7225	0.000219161	0.00553485	0.428644
PALD1	0.195676	-0.195676	21.558	-4.91223	0.000148276	0.00427143	0.819624
RHOG	0.19596	-0.19596	22.7518	-5.07265	0.000106881	0.00332285	1.14761
SNCA	0.196967	-0.196967	27.6637	-6.3185	9.37E-06	0.000576969	3.59265
SLC6A6	0.198182	-0.198182	21.4913	-4.65394	0.000252623	0.0060707	0.286621
ENPP6	0.198639	-0.198639	23.6732	-3.38779	0.00367438	0.0351875	-2.3631
PYGM	0.199688	-0.199688	25.8034	-4.17151	0.000694368	0.01178	-0.720895
NSDHL	0.200125	-0.200125	21.3306	-6.27673	1.01E-05	0.000619902	3.51396
GPM6A	0.200915	-0.200915	26.0862	-3.95064	0.00110879	0.0157281	-1.18493
SLC6A2	0.201777	-0.201777	20.912	-3.75499	0.0016811	0.0206467	-1.59596
APBB1IP	0.204015	-0.204015	21.3333	-4.72952	0.000216002	0.00553485	0.443161
MBP	0.20528	-0.20528	27.8617	-3.61825	0.00224956	0.0250187	-1.88258
GLUL	0.205995	-0.205995	26.8842	-6.01312	1.67E-05	0.000875852	3.01182
BCAN	0.20655	-0.20655	25.8347	-6.51488	6.51E-06	0.000440942	3.95934
HAPLN4	0.206768	-0.206768	22.4087	-3.7585	0.00166861	0.0205736	-1.5886
MYO1D	0.209464	-0.209464	25.5266	-4.98788	0.000127019	0.00383501	0.974614
FDPS	0.210364	-0.210364	23.8777	-3.46078	0.0031459	0.031526	-2.21136
DHRS11	0.214682	-0.214682	18.5026	-4.25925	0.000576986	0.0105624	-0.536837
SLC17A6	0.215173	-0.215173	22.8646	-4.3266	0.000500707	0.00966093	-0.395746
SLC6A11	0.215721	-0.215721	24.8733	-4.97365	0.000130764	0.00391047	0.945504
SPOCK2	0.215845	-0.215845	22.2571	-5.81901	2.43E-05	0.00110444	2.63609
LGI3	0.216128	-0.216128	23.4861	-4.04698	0.000903782	0.0139797	-0.982447
ASPA	0.219414	-0.219414	23.3037	-4.46217	0.000376754	0.00813997	-0.112359
NDRG1	0.220562	-0.220562	22.891	-4.64386	0.000257966	0.0061676	0.265712
TMEM240	0.22084	-0.22084	16.14	-3.82995	0.00143317	0.0185446	-1.43857
SERPINB1B	0.223488	-0.223488	22.1614	-3.66019	0.00205724	0.0236986	-1.79474
IDI1	0.224514	-0.224514	22.6766	-3.9903	0.00101925	0.0148858	-1.10158
GPM6B	0.224889	-0.224889	24.0615	-5.19862	8.28E-05	0.00269962	1.40334
SERPINE2	0.2285	-0.2285	22.0453	-4.71325	0.000223399	0.00560709	0.409496
GPC5	0.228712	-0.228712	19.1706	-5.65443	3.35E-05	0.00139426	2.31367
FAM177A1	0.22904	-0.22904	22.294	-3.89762	0.00124103	0.016992	-1.29636
SLC6A12	0.230041	-0.230041	20.5322	-4.40116	0.000428124	0.00884824	-0.239769
HMGCS1	0.232778	-0.232778	22.4511	-4.38299	0.000444764	0.00903877	-0.27776
EVI2A	0.232966	-0.232966	18.1866	-4.28955	0.000541308	0.0101779	-0.47334
ABCA8A	0.239284	-0.239284	17.9299	-4.13657	0.000747599	0.0123631	-0.794243
ADAMTS17	0.239874	-0.239874	16.1647	-3.31396	0.00429845	0.0390467	-2.51604
ENPP1	0.243744	-0.243744	17.8596	-6.3294	9.18E-06	0.000569043	3.61315
DAPK2	0.24891	-0.24891	17.1146	-4.53546	0.000323263	0.00724672	0.0403987
CD81	0.255665	-0.255665	22.4975	-5.65625	3.33E-05	0.00139426	2.31725
ABI3	0.257929	-0.257929	17.0719	-3.18397	0.00566223	0.0464636	-2.78379
PLPPR4	0.260845	-0.260845	22.5321	-7.9216	5.56E-07	6.38E-05	6.42681
ARSA	0.269651	-0.269651	20.6177	-8.99898	1.00E-07	1.78E-05	8.13217
DUSP15	0.270254	-0.270254	20.876	-4.36629	0.000460634	0.00919115	-0.312683
SERINC5	0.271276	-0.271276	19.7138	-3.2414	0.00501386	0.0425884	-2.66578
IGSF8	0.277702	-0.277702	24.9338	-5.62995	3.51E-05	0.0014447	2.26542
YLPM1	0.285301	-0.285301	24.7156	-4.66524	0.000246768	0.00597573	0.310053
TTYH1	0.285501	-0.285501	22.926	-5.49138	4.61E-05	0.00177352	1.99087
PLP1	0.287193	-0.287193	28.1587	-4.99615	0.000124896	0.00378301	0.991508
SERPINB1A	0.289217	-0.289217	23.6267	-4.01382	0.000969641	0.0144424	-1.05215
RGS10	0.289426	-0.289426	21.678	-8.4745	2.27E-07	3.24E-05	7.32122
MOG	0.290255	-0.290255	24.4219	-4.26176	0.000573937	0.0105624	-0.531567
CD82	0.29491	-0.29491	22.316	-3.64721	0.00211493	0.0241682	-1.82194
RHBDL2	0.29927	-0.29927	17.1088	-4.12569	0.000765003	0.0125985	-0.817087
GJC3	0.305491	-0.305491	21.3872	-4.46492	0.000374592	0.00811621	-0.106619
PROM1	0.313009	-0.313009	20.5734	-5.82391	2.40E-05	0.00110444	2.64564
SIRT2	0.326216	-0.326216	25.4203	-4.5971	0.000284296	0.00659623	0.168631
BTBD17	0.327851	-0.327851	21.7447	-5.62959	3.51E-05	0.0014447	2.26471
EPDR1	0.333958	-0.333958	22.8068	-7.60337	9.47E-07	9.99E-05	5.89301
CNP	0.356311	-0.356311	27.9012	-4.89454	0.000153753	0.00438895	0.783304
CARNS1	0.358742	-0.358742	18.6461	-4.72903	0.000216221	0.00553485	0.44215
TSPAN2	0.362481	-0.362481	22.4515	-4.57004	0.000300776	0.00686031	0.112368
S1PR5	0.394367	-0.394367	16.494	-3.62904	0.00219844	0.0246833	-1.86
N4BP2L2	0.398205	-0.398205	23.2822	-4.79385	0.000189133	0.00504712	0.576023
N4BP2L1	0.398411	-0.398411	23.2661	-4.79519	0.000188611	0.00504712	0.578788
SLC13A5	0.400224	-0.400224	21.3282	-6.61698	5.39E-06	0.000382004	4.14786
TNC	0.413637	-0.413637	23.0164	-7.59895	9.54E-07	9.99E-05	5.8855
OLFML3	0.438857	-0.438857	15.9945	-5.12208	9.67E-05	0.00304615	1.24817
FOLR2	0.477566	-0.477566	20.674	-4.94341	0.000139106	0.00406951	0.883555
VSIR	0.943296	-0.943296	16.9626	-6.39445	8.13E-06	0.000517642	3.73511
CRYBB1	1.39824	-1.39824	17.9934	-15.4467	3.71E-11	4.99E-08	15.7263
HPGDS	1.47233	-1.47233	16.2627	-14.8509	6.77E-11	5.54E-08	15.1724
ACY3	1.92025	-1.92025	21.1396	-27.9439	3.35E-15	1.58E-11	23.4443
P2RY12	2.47037	-2.47037	20.5405	-32.1978	3.46E-16	3.26E-12	24.9992
