# Supplementary material for: Brain wide engraftment of human monocytes induces neurodegeneration and cognitive dysfunction
Source: Research Square preprint supplement (doi:10.21203/rs.3.rs-7762816/v1), 2025-10-10
Supplement: Supplementary file 2 [file 820b52aef9e234b386c553c7.xlsx]

## Sheet: DEG_overlap_FDR_0.05_logFC1_8_1
Gene	logFC	logCPM	F	PValue	FDR	gene	type	regulation
LSR	11.4056	3.26445	433.269	2.24842350711567e-05	0.00203032	LSR	pseudobulk	up
NT5DC4	9.81207	1.66492	179.521	0.000138047	0.00417016	NT5DC4	pseudobulk	up
HOXB2	9.72212	1.68837	169.382	0.000155478	0.00437283	HOXB2	pseudobulk	up
CLIP4	9.62483	3.89561	471.765	1.40201152480678e-07	0.00130949	CLIP4	pseudobulk	up
MEIKIN	8.96284	1.31748	105.675	0.000405707	0.0069848	MEIKIN	pseudobulk	up
FAM241B	8.83483	0.982852	100.052	0.000453038	0.00719617	FAM241B	pseudobulk	up
CRTAM	8.54059	0.521685	81.0278	0.000692008	0.00865606	CRTAM	pseudobulk	up
WBP2NL	8.48065	0.576817	79.115	0.000725865	0.00886944	WBP2NL	pseudobulk	up
SLC46A2	8.43511	0.210219	72.6144	0.000861269	0.00969764	SLC46A2	pseudobulk	up
AC008687.4	8.41445	0.152338	70.687	0.00090863	0.00988752	AC008687.4	pseudobulk	up
TDRD9	8.33104	2.47247	249.332	1.0839383014801e-06	0.00130949	TDRD9	pseudobulk	up
PTK6	8.30641	0.34314	69.4475	0.000941153	0.0100262	PTK6	pseudobulk	up
CAMP	8.14901	0.237718	59.1523	0.00129293	0.0118322	CAMP	pseudobulk	up
LIF	8.09683	0.689558	64.4854	0.00109023	0.010869	LIF	pseudobulk	up
KLHL30	8.06657	-0.0885973	56.9967	0.00139096	0.0122714	KLHL30	pseudobulk	up
ITPR3	7.95415	-0.0330493	52.8481	0.00161333	0.0130728	ITPR3	pseudobulk	up
GREB1	7.91325	0.0959701	53.6384	0.0015671	0.0129231	GREB1	pseudobulk	up
EMP2	7.90885	0.614945	56.8356	0.00139873	0.0122734	EMP2	pseudobulk	up
ZFP57	7.87453	0.61554	51.2402	0.00171385	0.0134442	ZFP57	pseudobulk	up
CYP27A1	7.61463	6.22321	262.285	1.25927179877303e-05	0.0016908	CYP27A1	pseudobulk	up
TM4SF19	7.54378	2.10073	204.127	4.11409599939518e-06	0.00130949	TM4SF19	pseudobulk	up
TRIB3	7.50324	2.11456	140.666	8.66364387864127e-06	0.00154771	TRIB3	pseudobulk	up
CSMD1	7.42361	-0.100097	37.2738	0.00317041	0.0183541	CSMD1	pseudobulk	up
KLF8	7.37692	-0.105094	37.1768	0.00318623	0.0183658	KLF8	pseudobulk	up
ALOX15B	7.26362	3.56267	228.798	1.48218155878184e-05	0.00179097	ALOX15B	pseudobulk	up
CES1	7.23796	1.94438	161.206	6.57076914971538e-05	0.00292657	CES1	pseudobulk	up
KMO	7.19464	2.75905	173.822	2.03676036066042e-05	0.00198253	KMO	pseudobulk	up
MLPH	7.19463	4.80499	625.279	1.4186179616906e-06	0.00130949	MLPH	pseudobulk	up
UTS2	7.1242	-0.187996	30.6592	0.00458917	0.022181	UTS2	pseudobulk	up
ALKAL2	7.10562	1.75601	159.524	3.09041152164905e-05	0.00220251	ALKAL2	pseudobulk	up
SAMD12	6.89443	1.24215	95.9399	3.10635344169296e-05	0.00220251	SAMD12	pseudobulk	up
CD52	6.89059	1.33438	100.647	2.478927054672e-05	0.00207372	CD52	pseudobulk	up
LY9	6.87715	2.38735	151.444	1.09340928148641e-05	0.00160326	LY9	pseudobulk	up
DNAJC5B	6.85271	2.14106	154.476	1.28704775073736e-05	0.0016908	DNAJC5B	pseudobulk	up
MACC1	6.71156	4.12334	675.687	1.16413902653374e-06	0.00130949	MACC1	pseudobulk	up
SERPINE1	6.67416	1.91584	114.375	3.34371017493114e-05	0.00223958	SERPINE1	pseudobulk	up
EVC	6.65865	2.19145	282.593	2.45318414217258e-06	0.00130949	EVC	pseudobulk	up
CHRNA1	6.59663	0.867301	114.512	4.16769066063305e-05	0.00241935	CHRNA1	pseudobulk	up
ALDH1A1	6.58908	4.94313	525.786	2.13018082294883e-06	0.00130949	ALDH1A1	pseudobulk	up
TPRG1	6.58303	4.14233	612.131	1.4765874725066e-06	0.00130949	TPRG1	pseudobulk	up
HTRA4	6.53937	5.15928	598.446	1.52080938080009e-06	0.00130949	HTRA4	pseudobulk	up
CLEC2B	6.52601	4.28756	413.45	4.04749000899985e-06	0.00130949	CLEC2B	pseudobulk	up
SCIN	6.51722	4.28583	505.442	2.41314138720455e-06	0.00130949	SCIN	pseudobulk	up
ADAMDEC1	6.51392	3.9393	76.3714	0.000184887	0.00473419	ADAMDEC1	pseudobulk	up
IFI27	6.44213	5.29775	157.323	4.55887634407372e-05	0.00253739	IFI27	pseudobulk	up
INPP5J	6.44172	1.61913	233.541	4.31084521650178e-06	0.00133944	INPP5J	pseudobulk	up
CD22	6.43824	3.58788	480.986	2.81119039793899e-06	0.00130949	CD22	pseudobulk	up
FCGR2B	6.41738	3.51361	155.87	4.17129488279464e-05	0.00241935	FCGR2B	pseudobulk	up
HSH2D	6.36463	2.33418	135.365	3.16222513851898e-05	0.00220251	HSH2D	pseudobulk	up
KLHDC7B	6.32784	0.587019	94.2838	4.56924579330228e-05	0.00253739	KLHDC7B	pseudobulk	up
TVP23A	6.29747	2.22637	109.691	2.57018461876336e-05	0.00209103	TVP23A	pseudobulk	up
CHRNA6	6.29469	1.7263	106.49	4.33544832419227e-05	0.00248147	CHRNA6	pseudobulk	up
CLEC12A	6.29414	1.92533	188.134	1.25477374493108e-05	0.0016908	CLEC12A	pseudobulk	up
VNN2	6.25134	2.41127	234.062	1.29036532870606e-05	0.0016908	VNN2	pseudobulk	up
CR1L	6.22857	0.415208	50.7145	0.000342792	0.00654968	CR1L	pseudobulk	up
BEAN1	6.1871	2.91517	165.036	3.16837398167826e-05	0.00220251	BEAN1	pseudobulk	up
IFI44L	6.17142	6.54712	86.5704	0.000201078	0.00494294	IFI44L	pseudobulk	up
SLC9A7	6.16852	3.78396	438.297	3.51340187655911e-06	0.00130949	SLC9A7	pseudobulk	up
STEAP3	6.16711	3.67631	179.586	3.38332980335026e-05	0.00223958	STEAP3	pseudobulk	up
SAMD13	6.13096	0.669434	76.2644	5.66851329339916e-05	0.00277057	SAMD13	pseudobulk	up
LGALS3BP	6.12831	6.42942	299.465	8.89489546811459e-06	0.00154771	LGALS3BP	pseudobulk	up
AHNAK	6.1154	6.65705	185.687	2.99116930058606e-05	0.00217076	AHNAK	pseudobulk	up
CPA6	6.09739	0.259262	69.5329	7.43471854235635e-05	0.00309978	CPA6	pseudobulk	up
SNTB1	6.06775	2.61455	174.841	3.43231162505982e-05	0.00223958	SNTB1	pseudobulk	up
DNASE2B	6.0607	1.7041	105.164	7.86216759688362e-05	0.00318638	DNASE2B	pseudobulk	up
CD72	6.05589	3.31039	442.3	3.44117301789232e-06	0.00130949	CD72	pseudobulk	up
FPR3	6.03092	4.77303	206.399	2.30258932253922e-05	0.00203032	FPR3	pseudobulk	up
MDFIC	6.02955	4.74575	328.028	7.08021606557924e-06	0.00153886	MDFIC	pseudobulk	up
ZBP1	6.0265	4.54467	250.695	1.43654208999967e-05	0.00178381	ZBP1	pseudobulk	up
SERINC2	6.025	1.52525	183.372	8.51785733420333e-06	0.00154771	SERINC2	pseudobulk	up
AIM2	6.01972	2.11551	82.6293	6.79910011727257e-05	0.00297746	AIM2	pseudobulk	up
MMP9	6.01683	1.449	32.4822	0.00285799	0.017404	MMP9	pseudobulk	up
PRLR	5.96534	1.31301	173.104	1.04372359209572e-05	0.00159187	PRLR	pseudobulk	up
ACP5	5.91105	5.85474	864.949	5.87443512279687e-07	0.00130949	ACP5	pseudobulk	up
COL6A1	5.89177	0.872503	76.1124	0.000193472	0.00486167	COL6A1	pseudobulk	up
DDO	5.88848	1.19462	161.931	1.20028177239302e-05	0.0016908	DDO	pseudobulk	up
RUFY4	5.87594	3.57564	380.487	5.02073514586853e-06	0.00142703	RUFY4	pseudobulk	up
LY6E	5.86742	4.88429	131.854	7.08726357977605e-05	0.00303083	LY6E	pseudobulk	up
ATP8B1	5.86052	1.5011	160.801	1.06035923526716e-05	0.00159187	ATP8B1	pseudobulk	up
GPNMB	5.83178	8.92324	928.732	4.88384817306773e-07	0.00130949	GPNMB	pseudobulk	up
DDTL	5.82892	1.86064	191.951	1.55244840388485e-05	0.00180888	DDTL	pseudobulk	up
NAALADL1	5.81154	0.324555	59.9641	0.00012016	0.0039972	NAALADL1	pseudobulk	up
IL7	5.77767	1.12622	46.0347	0.000337371	0.00651285	IL7	pseudobulk	up
HES4	5.76627	1.95995	127.334	1.68752599576217e-05	0.00184268	HES4	pseudobulk	up
CR1	5.74814	2.76479	271.583	1.13059795056212e-05	0.00162332	CR1	pseudobulk	up
SDS	5.7308	5.47118	633.286	1.30876044242501e-06	0.00130949	SDS	pseudobulk	up
CLEC12B	5.68584	0.169433	59.9089	0.000146768	0.00425628	CLEC12B	pseudobulk	up
S100A10	5.65575	3.68251	391.545	4.47890741967957e-06	0.00135539	S100A10	pseudobulk	up
MCOLN3	5.65066	1.17945	84.5098	5.96267349327886e-05	0.00280913	MCOLN3	pseudobulk	up
OTOA	5.62792	2.12524	231.308	1.70583236970706e-05	0.00184268	OTOA	pseudobulk	up
TRIB2	5.61599	1.68907	67.385	0.000233823	0.00528838	TRIB2	pseudobulk	up
PROC	5.56345	3.31596	369.633	5.3943653111909e-06	0.0014978	PROC	pseudobulk	up
HOXB6	5.55936	0.0903105	25.7434	0.00336554	0.0188257	HOXB6	pseudobulk	up
ESR1	5.55421	2.47238	286.275	1.01064237856142e-05	0.00157791	ESR1	pseudobulk	up
OSBPL5	5.55154	0.718381	56.0193	0.000252754	0.00551403	OSBPL5	pseudobulk	up
C3orf84	5.542	0.974907	115.482	2.29013353636374e-05	0.00203032	C3orf84	pseudobulk	up
CD109	5.49864	2.59204	126.342	3.07927482133923e-05	0.00220251	CD109	pseudobulk	up
CAPN12	5.44315	-0.0652679	34.3707	0.000797976	0.00925652	CAPN12	pseudobulk	up
FER1L6	5.4258	1.0198	121.515	2.85458403542333e-05	0.0021367	FER1L6	pseudobulk	up
RTN4R	5.39827	1.29155	132.015	4.31468403386597e-05	0.00248047	RTN4R	pseudobulk	up
LRRC75B	5.38538	1.80642	136.617	6.02287407465563e-05	0.00282728	LRRC75B	pseudobulk	up
RGS13	5.36477	0.192349	41.9991	0.000358806	0.00663411	RGS13	pseudobulk	up
MANSC4	5.3545	0.895898	97.4398	3.63674765462667e-05	0.00230386	MANSC4	pseudobulk	up
NEURL3	5.34032	1.37534	163.715	3.16000076898737e-05	0.00220251	NEURL3	pseudobulk	up
IFI6	5.3388	7.37397	297.249	9.059687055989e-06	0.00155564	IFI6	pseudobulk	up
LILRA6	5.32452	2.14505	58.0272	0.000453787	0.00719617	LILRA6	pseudobulk	up
ALK	5.30027	0.858533	110.885	3.81615553127241e-05	0.0023335	ALK	pseudobulk	up
SLC47A1	5.29592	5.21866	194.034	2.6781493274237e-05	0.00209103	SLC47A1	pseudobulk	up
CXCL10	5.27005	5.05488	34.3567	0.00182705	0.0139687	CXCL10	pseudobulk	up
ODF3B	5.2694	6.55033	284.219	1.01566484672962e-05	0.00157791	ODF3B	pseudobulk	up
ITGA4	5.26562	6.27027	802.111	7.12284196668656e-07	0.00130949	ITGA4	pseudobulk	up
TRIM63	5.22682	0.102672	20.3914	0.00455483	0.0220722	TRIM63	pseudobulk	up
L3MBTL4	5.22294	4.61533	418.819	3.78029739724314e-06	0.00130949	L3MBTL4	pseudobulk	up
KRT36	5.20332	0.12951	34.0799	0.000706202	0.00875496	KRT36	pseudobulk	up
ANXA1	5.19989	3.94672	484.714	2.61887469786225e-06	0.00130949	ANXA1	pseudobulk	up
ZNF835	5.19526	0.437852	46.5638	0.000444544	0.00719617	ZNF835	pseudobulk	up
IFI44	5.1677	6.88403	50.7984	0.000731726	0.00889937	IFI44	pseudobulk	up
CCDC78	5.16024	2.37952	222.409	1.99058966248687e-05	0.00195984	CCDC78	pseudobulk	up
LYZ	5.15288	7.6795	519.581	2.17254282396299e-06	0.00130949	LYZ	pseudobulk	up
ZNF736	5.14488	1.95586	62.3645	0.000443789	0.00719617	ZNF736	pseudobulk	up
NOD2	5.14358	2.20802	87.17	0.000202615	0.00494413	NOD2	pseudobulk	up
ZBED6CL	5.14267	1.09394	60.2794	0.000341543	0.00654498	ZBED6CL	pseudobulk	up
SARDH	5.11729	0.717914	79.7673	0.000117186	0.00393129	SARDH	pseudobulk	up
ZFP3	5.0957	3.2374	72.8285	0.000310082	0.006234	ZFP3	pseudobulk	up
MX2	5.09017	4.45712	86.5328	0.000201505	0.00494294	MX2	pseudobulk	up
SLAMF8	5.08902	3.89226	86.2999	0.000203428	0.00494413	SLAMF8	pseudobulk	up
IFIT3	5.06907	5.3102	100.073	0.00014061	0.00418138	IFIT3	pseudobulk	up
GMPR	5.06823	2.25678	117.535	9.68782117775897e-05	0.00357449	GMPR	pseudobulk	up
EMP1	5.06615	1.87682	82.5439	0.000181844	0.00469311	EMP1	pseudobulk	up
GDF15	5.0531	0.740001	61.5365	0.000144182	0.00423577	GDF15	pseudobulk	up
FAM174B	5.03027	2.1497	55.659	0.000579929	0.00796118	FAM174B	pseudobulk	up
SLC6A12	5.0281	1.86246	115.204	9.86449512618559e-05	0.00358584	SLC6A12	pseudobulk	up
FCAR	5.01013	1.21909	52.5741	0.000487354	0.00745699	FCAR	pseudobulk	up
CD9	5.00849	6.49808	134.373	6.74665787162831e-05	0.00296444	CD9	pseudobulk	up
NLRP12	5.00663	0.983953	63.7394	0.000350493	0.00658446	NLRP12	pseudobulk	up
CSTA	5.00366	2.08392	107.303	0.000115525	0.00388558	CSTA	pseudobulk	up
EMILIN2	4.96404	5.68535	121.339	8.70804691997105e-05	0.00336772	EMILIN2	pseudobulk	up
FAM24B	4.96158	1.66538	52.2663	0.000672697	0.00854554	FAM24B	pseudobulk	up
ACACB	4.95698	1.5935	116.405	8.94306974313553e-05	0.00343256	ACACB	pseudobulk	up
VIM	4.95115	8.83863	934.993	4.80007743972608e-07	0.00130949	VIM	pseudobulk	up
KCTD15	4.94688	1.07849	83.4883	0.000124547	0.004034	KCTD15	pseudobulk	up
PTPRM	4.9458	2.33269	94.3822	0.000162901	0.0044755	PTPRM	pseudobulk	up
AMIGO2	4.94132	2.43599	129.767	7.62208350111479e-05	0.0031378	AMIGO2	pseudobulk	up
TMEM26	4.93701	1.83627	142.172	5.80646432713054e-05	0.00278582	TMEM26	pseudobulk	up
BEX3	4.93331	3.42434	132.321	7.22362315992026e-05	0.00305075	BEX3	pseudobulk	up
CCL28	4.92811	0.337129	81.0885	9.22405951491708e-05	0.0034911	CCL28	pseudobulk	up
TYMP	4.87365	7.66749	418.69	3.77688318078838e-06	0.00130949	TYMP	pseudobulk	up
MSR1	4.86582	7.00084	241.403	1.53829447013279e-05	0.00180854	MSR1	pseudobulk	up
APOL3	4.86554	2.19929	81.9588	0.000237529	0.0053237	APOL3	pseudobulk	up
PRKACB	4.84524	3.67098	434.452	3.45132032430781e-06	0.00130949	PRKACB	pseudobulk	up
FGR	4.83998	4.73578	148.92	5.21675464638241e-05	0.00274588	FGR	pseudobulk	up
CD48	4.82844	3.66622	358.436	5.64483901172477e-06	0.00152789	CD48	pseudobulk	up
PKD2L1	4.82738	3.29751	290.627	9.66179885214501e-06	0.00157423	PKD2L1	pseudobulk	up
LGALS3	4.82393	6.81821	200.703	2.45660458512828e-05	0.0020683	LGALS3	pseudobulk	up
OAS2	4.81495	5.93868	56.1426	0.000576198	0.00796118	OAS2	pseudobulk	up
JHY	4.79768	2.14921	174.199	3.67853879082965e-05	0.00230433	JHY	pseudobulk	up
RASGRF1	4.79503	0.28459	35.7458	0.000920113	0.00993758	RASGRF1	pseudobulk	up
ANXA2	4.77423	5.76881	686.441	1.06307433603103e-06	0.00130949	ANXA2	pseudobulk	up
ASRGL1	4.77292	3.05399	329.63	7.06256819868593e-06	0.00153886	ASRGL1	pseudobulk	up
CFD	4.75696	5.11851	175.172	3.46676659480335e-05	0.00225081	CFD	pseudobulk	up
DCSTAMP	4.72742	0.279499	70.2331	0.000135748	0.00413626	DCSTAMP	pseudobulk	up
DUSP4	4.71271	0.399904	21.1433	0.00299276	0.0178011	DUSP4	pseudobulk	up
TNFAIP8L3	4.6981	0.441295	43.6739	0.000776201	0.00913687	TNFAIP8L3	pseudobulk	up
TRIM14	4.67643	5.94948	630.742	1.32097569795424e-06	0.00130949	TRIM14	pseudobulk	up
CCDC152	4.67105	-0.0374468	34.8464	0.00100151	0.0103762	CCDC152	pseudobulk	up
IRF4	4.66994	0.230044	66.9271	0.000159456	0.00442745	IRF4	pseudobulk	up
ZDHHC18	4.66157	3.06312	232.041	1.71456780291484e-05	0.00184268	ZDHHC18	pseudobulk	up
HOXB4	4.64411	1.14354	64.759	0.000132905	0.00412109	HOXB4	pseudobulk	up
PPIC	4.63705	1.17169	41.7216	0.000540368	0.00780741	PPIC	pseudobulk	up
PTPN22	4.61641	2.87781	216.1	2.07322274631959e-05	0.00198253	PTPN22	pseudobulk	up
ZNF185	4.60216	1.76904	134.494	6.94950510696379e-05	0.00301299	ZNF185	pseudobulk	up
PYHIN1	4.58649	-0.0325978	55.9526	0.000200561	0.00494294	PYHIN1	pseudobulk	up
CLEC5A	4.58639	4.75422	182.711	3.121932076502e-05	0.00220251	CLEC5A	pseudobulk	up
ZP3	4.58309	-0.0311284	29.2492	0.00153153	0.0128127	ZP3	pseudobulk	up
CSRP2	4.55757	1.18395	69.3043	0.000321009	0.00632805	CSRP2	pseudobulk	up
LRRC61	4.55634	-0.0466222	24.3134	0.00220941	0.0152853	LRRC61	pseudobulk	up
ISG15	4.55448	5.90951	152.252	4.93164949651683e-05	0.00265826	ISG15	pseudobulk	up
IFIT1	4.5501	4.4092	146.703	5.41710543438687e-05	0.00274588	IFIT1	pseudobulk	up
B3GNT7	4.54644	1.27638	112.902	9.72369801060758e-05	0.00357449	B3GNT7	pseudobulk	up
SNTA1	4.54434	0.079357	60.1727	0.000210053	0.00500219	SNTA1	pseudobulk	up
RARRES1	4.53956	1.03606	103.289	6.3089017619554e-05	0.00287956	RARRES1	pseudobulk	up
DOCK1	4.53656	4.01494	455.461	3.05069360003664e-06	0.00130949	DOCK1	pseudobulk	up
TRIM47	4.51961	3.49467	180.582	3.21597295661117e-05	0.00222055	TRIM47	pseudobulk	up
KANK1	4.51513	1.94269	157.146	4.72677172678169e-05	0.00260272	KANK1	pseudobulk	up
GBP3	4.49714	2.1855	118.02	9.567508704094e-05	0.00356731	GBP3	pseudobulk	up
CIDEB	4.48836	4.1929	119.504	9.05386442235005e-05	0.00345476	CIDEB	pseudobulk	up
NXF3	4.48431	0.619572	60.347	0.000192591	0.00486167	NXF3	pseudobulk	up
STAP1	4.48135	1.68528	100.504	0.000144348	0.00423577	STAP1	pseudobulk	up
IFNLR1	4.47178	1.73134	143.704	5.79546036377204e-05	0.00278582	IFNLR1	pseudobulk	up
TSKU	4.44917	2.5221	97.7476	0.000151339	0.00430278	TSKU	pseudobulk	up
USP18	4.42675	3.51174	65.146	0.00040336	0.0069848	USP18	pseudobulk	up
JAML	4.41568	2.31712	69.7737	0.000347594	0.00658446	JAML	pseudobulk	up
LSP1	4.40556	5.56766	141.337	5.94450500068944e-05	0.00280913	LSP1	pseudobulk	up
B3GNT8	4.40513	2.3254	230.008	1.77728273964832e-05	0.00185548	B3GNT8	pseudobulk	up
PNPLA3	4.37807	2.32592	206.386	2.36524760152621e-05	0.00203502	PNPLA3	pseudobulk	up
HSPA6	4.37137	6.61744	672.325	1.12108644173094e-06	0.00130949	HSPA6	pseudobulk	up
VNN1	4.35126	1.70519	101.691	0.000139533	0.00417638	VNN1	pseudobulk	up
SIGLEC1	4.34677	6.96	168.014	3.84848966811499e-05	0.0023335	SIGLEC1	pseudobulk	up
SH3D21	4.33842	4.21581	196.168	2.6051650354684e-05	0.00209103	SH3D21	pseudobulk	up
IFIT2	4.33584	4.98128	134.655	6.71203478019536e-05	0.00296444	IFIT2	pseudobulk	up
CCDC36	4.30387	0.322459	58.1071	0.000377009	0.00681436	CCDC36	pseudobulk	up
PAPSS2	4.30377	2.17274	148.089	5.50447040749577e-05	0.00274588	PAPSS2	pseudobulk	up
AKR1E2	4.29791	2.80222	149.8	5.19632369939766e-05	0.00274588	AKR1E2	pseudobulk	up
TMEM71	4.29512	2.38351	136.486	6.74585753878719e-05	0.00296444	TMEM71	pseudobulk	up
CDC42EP3	4.29354	2.67122	176.902	3.42702625914897e-05	0.00223958	CDC42EP3	pseudobulk	up
ADTRP	4.27486	1.85211	44.9002	0.000680483	0.0085926	ADTRP	pseudobulk	up
VWF	4.27396	0.805659	90.958	0.000164842	0.00449099	VWF	pseudobulk	up
MX1	4.27137	5.75955	68.9939	0.00035026	0.00658446	MX1	pseudobulk	up
SDC4	4.25867	1.73275	118.508	8.31117088579506e-05	0.00327329	SDC4	pseudobulk	up
RASGEF1B	4.25426	3.66527	221.944	1.90676288176244e-05	0.00193828	RASGEF1B	pseudobulk	up
CD74	4.24917	10.9728	90.8602	0.000178453	0.00465763	CD74	pseudobulk	up
FLNB	4.22126	1.25161	99.1676	0.000140661	0.00418138	FLNB	pseudobulk	up
ADGRE2	4.218	5.32155	430.765	3.51237509465362e-06	0.00130949	ADGRE2	pseudobulk	up
ME1	4.21728	4.2833	417.036	3.81866179125852e-06	0.00130949	ME1	pseudobulk	up
PARP15	4.19267	3.54956	290.157	9.65389449202551e-06	0.00157423	PARP15	pseudobulk	up
SLAMF6	4.19238	0.19081	33.2322	0.0013715	0.0122064	SLAMF6	pseudobulk	up
OAS3	4.19051	5.90462	91.2913	0.000176391	0.00465032	OAS3	pseudobulk	up
S100A4	4.18973	6.38025	173.257	3.56176646852553e-05	0.00228721	S100A4	pseudobulk	up
PTGER4	4.17042	4.09592	420.448	3.74016224736794e-06	0.00130949	PTGER4	pseudobulk	up
APOC1	4.17017	6.51328	342.271	6.32230145747384e-06	0.00152789	APOC1	pseudobulk	up
TMEM140	4.16392	4.07939	406.36	4.08210504893717e-06	0.00130949	TMEM140	pseudobulk	up
CELSR1	4.16289	1.18543	78.6263	0.000251794	0.00551403	CELSR1	pseudobulk	up
FBP1	4.16181	3.67634	312	8.01720525736566e-06	0.00154771	FBP1	pseudobulk	up
RAB17	4.15928	1.38936	79.3616	0.000237963	0.0053237	RAB17	pseudobulk	up
HSBP1L1	4.1568	2.16728	179.549	3.34754116326372e-05	0.00223958	HSBP1L1	pseudobulk	up
NUPR1	4.15638	8.86849	388.625	4.5699056982119e-06	0.00135539	NUPR1	pseudobulk	up
DGKG	4.15435	1.81026	107.084	0.000122653	0.0039972	DGKG	pseudobulk	up
ITGAD	4.14661	3.60232	37.02	0.00153896	0.0128372	ITGAD	pseudobulk	up
GBP4	4.13397	1.58807	29.1341	0.0027039	0.0169889	GBP4	pseudobulk	up
CCL18	4.11243	0.980506	56.2819	0.000187471	0.00476678	CCL18	pseudobulk	up
GLB1L	4.10539	2.19171	178.22	3.39611327902853e-05	0.00223958	GLB1L	pseudobulk	up
CD44	4.10354	5.71674	102.032	0.000133978	0.00413338	CD44	pseudobulk	up
ADGRE3	4.10222	0.816017	20.8544	0.00356903	0.0194066	ADGRE3	pseudobulk	up
NKAPL	4.09717	0.0968586	39.6461	0.000833434	0.00949068	NKAPL	pseudobulk	up
SLC6A16	4.08634	0.768893	64.2456	0.000368812	0.00672006	SLC6A16	pseudobulk	up
TBC1D2	4.08244	4.41555	432.208	3.48357858587372e-06	0.00130949	TBC1D2	pseudobulk	up
ADCY3	4.08139	5.1633	485.441	2.58674272098673e-06	0.00130949	ADCY3	pseudobulk	up
SLC22A1	4.07685	1.07473	87.1148	0.000201473	0.00494294	SLC22A1	pseudobulk	up
ANKRD22	4.04878	2.57918	31.2482	0.00227512	0.0155773	ANKRD22	pseudobulk	up
B3GALNT1	4.04576	3.44913	258.437	1.29563535265555e-05	0.0016908	B3GALNT1	pseudobulk	up
TGFA	4.03972	0.697451	66.3733	0.00032631	0.00639392	TGFA	pseudobulk	up
EVA1C	4.03807	0.0929778	42.0339	0.000800472	0.00927723	EVA1C	pseudobulk	up
NCR3LG1	4.00598	0.478832	50.7156	0.000534905	0.00778206	NCR3LG1	pseudobulk	up
IFITM10	3.99975	6.0182	499.719	2.40073736301102e-06	0.00130949	IFITM10	pseudobulk	up
MBOAT1	3.99668	3.13584	110.514	0.000110089	0.00381077	MBOAT1	pseudobulk	up
SLCO3A1	3.99355	1.38077	102.583	0.000129195	0.00410218	SLCO3A1	pseudobulk	up
STBD1	3.96429	-0.0242027	47.3774	0.000613912	0.00822542	STBD1	pseudobulk	up
HOXB7	3.92576	1.66051	62.6954	0.000452536	0.00719617	HOXB7	pseudobulk	up
HOXC4	3.92469	-0.050211	31.3519	0.00139274	0.0122714	HOXC4	pseudobulk	up
C9orf64	3.92249	3.4045	78.9413	0.000252433	0.00551403	C9orf64	pseudobulk	up
GPX3	3.91746	4.20246	327.765	7.07556912297959e-06	0.00153886	GPX3	pseudobulk	up
PLAU	3.91602	5.76026	469.161	2.82226937049802e-06	0.00130949	PLAU	pseudobulk	up
CLECL1	3.88237	3.83465	17.7464	0.00778673	0.0298667	CLECL1	pseudobulk	up
HELZ2	3.86563	2.89116	32.3464	0.00209964	0.0148856	HELZ2	pseudobulk	up
RSAD2	3.86444	3.62773	27.4149	0.00304534	0.0179955	RSAD2	pseudobulk	up
TOP1MT	3.86396	3.16138	221.595	1.91599972633943e-05	0.00193828	TOP1MT	pseudobulk	up
SASH1	3.85782	3.45858	53.0657	0.000659825	0.00847511	SASH1	pseudobulk	up
LRFN4	3.8441	3.48419	82.7842	0.000224589	0.00520584	LRFN4	pseudobulk	up
ARHGAP10	3.83757	3.79481	171.229	3.67155329614791e-05	0.00230433	ARHGAP10	pseudobulk	up
IFITM3	3.82925	3.74397	147.719	5.32415338541995e-05	0.00274588	IFITM3	pseudobulk	up
NQO1	3.82276	1.5021	70.7966	0.00032083	0.00632805	NQO1	pseudobulk	up
GPRC5B	3.81653	1.41563	26.3991	0.00334807	0.0187718	GPRC5B	pseudobulk	up
GPR157	3.81005	1.18535	91.4578	0.000181524	0.00469311	GPR157	pseudobulk	up
PAPLN	3.79955	2.69174	36.3522	0.00160735	0.0130619	PAPLN	pseudobulk	up
SIGLEC15	3.79836	0.59623	20.4272	0.00519768	0.0238321	SIGLEC15	pseudobulk	up
CD80	3.78723	4.25162	30.8771	0.00233026	0.0157157	CD80	pseudobulk	up
OLFML2A	3.78154	1.58863	99.68	0.000144763	0.00423577	OLFML2A	pseudobulk	up
IL4I1	3.77873	5.51107	437.658	3.37208097391859e-06	0.00130949	IL4I1	pseudobulk	up
ENPP1	3.77506	1.44628	46.7454	0.000906857	0.00988679	ENPP1	pseudobulk	up
RIC3	3.76881	0.729924	39.1	0.00134257	0.0120877	RIC3	pseudobulk	up
NLRC5	3.74892	5.00644	105.67	0.000122826	0.0039972	NLRC5	pseudobulk	up
CLDN1	3.74879	3.60238	174.664	3.49392354186e-05	0.00225721	CLDN1	pseudobulk	up
ISG20	3.74878	3.69985	95.397	0.000158335	0.00440956	ISG20	pseudobulk	up
GCHFR	3.74571	5.12378	117.021	9.52974092438086e-05	0.00356341	GCHFR	pseudobulk	up
CIITA	3.74342	7.71717	38.4598	0.00140779	0.0123183	CIITA	pseudobulk	up
GOLGA8B	3.73466	0.184229	48.2792	0.000656532	0.00846517	GOLGA8B	pseudobulk	up
SULT1C2	3.71709	1.57201	36.5207	0.00160885	0.013065	SULT1C2	pseudobulk	up
BCL2A1	3.7156	3.9217	69.1931	0.000347921	0.00658446	BCL2A1	pseudobulk	up
TAF4B	3.6984	0.521712	57.6078	0.000511678	0.00758795	TAF4B	pseudobulk	up
PSMB9	3.69632	3.97822	178.132	3.32217807218842e-05	0.00223958	PSMB9	pseudobulk	up
BST1	3.69117	1.52223	108.156	0.000119632	0.00399284	BST1	pseudobulk	up
SLC38A6	3.6536	5.53053	423.683	3.66419832509548e-06	0.00130949	SLC38A6	pseudobulk	up
LGALS1	3.65043	8.19917	93.9155	0.000164465	0.0044901	LGALS1	pseudobulk	up
GAPT	3.63959	2.60013	131.397	7.152252835256e-05	0.00304029	GAPT	pseudobulk	up
BTN2A2	3.63594	3.72699	109.448	0.000112602	0.00384262	BTN2A2	pseudobulk	up
PCGF2	3.63034	1.73191	95.4095	0.000162632	0.0044755	PCGF2	pseudobulk	up
SULT1A1	3.62262	1.41206	61.589	0.00047344	0.00733775	SULT1A1	pseudobulk	up
TGFBI	3.62209	7.17487	513.325	2.24083076752731e-06	0.00130949	TGFBI	pseudobulk	up
TGFB2	3.62067	1.46349	76.8275	0.000276081	0.00580608	TGFB2	pseudobulk	up
FXYD6	3.6008	3.58529	151.438	5.00208914585127e-05	0.00266438	FXYD6	pseudobulk	up
SLC45A3	3.59442	0.033456	36.9235	0.00138163	0.0122336	SLC45A3	pseudobulk	up
MAP3K6	3.59246	0.557803	34.8617	0.00175662	0.0136859	MAP3K6	pseudobulk	up
ACVRL1	3.58607	2.10557	135.439	6.68569721908856e-05	0.00296444	ACVRL1	pseudobulk	up
MCF2L2	3.5856	0.12572	34.0444	0.00146001	0.0125384	MCF2L2	pseudobulk	up
CIART	3.5838	-0.0778857	23.7787	0.00344918	0.0191084	CIART	pseudobulk	up
MOK	3.58273	0.998164	29.4521	0.00263875	0.0167733	MOK	pseudobulk	up
ERAP2	3.58059	1.79547	97.7732	0.000151289	0.00430278	ERAP2	pseudobulk	up
HAGHL	3.57899	5.39513	211.974	2.13927514570998e-05	0.00198253	HAGHL	pseudobulk	up
CLIC2	3.53058	1.73793	121.812	8.79021041043937e-05	0.00338384	CLIC2	pseudobulk	up
FLVCR2	3.52644	2.05562	70.609	0.000333684	0.0064862	FLVCR2	pseudobulk	up
TNFSF13B	3.52531	5.47928	206.737	2.2791781435578e-05	0.00203032	TNFSF13B	pseudobulk	up
AMDHD1	3.51351	1.27616	21.8958	0.00485476	0.0227976	AMDHD1	pseudobulk	up
OASL	3.51086	2.75827	35.4994	0.00169609	0.0133777	OASL	pseudobulk	up
SCD	3.50941	4.47343	243.478	1.50572134864214e-05	0.00180272	SCD	pseudobulk	up
HPN	3.50793	1.34642	102.15	0.000137208	0.00415445	HPN	pseudobulk	up
TSPAN4	3.50565	4.73983	348.023	6.05980757962206e-06	0.00152789	TSPAN4	pseudobulk	up
KIAA1522	3.50453	2.69648	202.89	2.39610163706856e-05	0.00204373	KIAA1522	pseudobulk	up
ZNF682	3.50376	0.371552	45.3192	0.000833015	0.00949068	ZNF682	pseudobulk	up
TNFAIP2	3.50113	7.72277	279.343	1.06124788086446e-05	0.00159187	TNFAIP2	pseudobulk	up
TREM1	3.49588	0.97142	39.8283	0.00113704	0.0111399	TREM1	pseudobulk	up
TOM1L1	3.49549	1.05583	61.9011	0.000467725	0.00730995	TOM1L1	pseudobulk	up
SYNE3	3.4953	3.20418	34.61	0.00179748	0.0138498	SYNE3	pseudobulk	up
LILRA2	3.49103	4.44893	323.354	7.31104303507437e-06	0.00153886	LILRA2	pseudobulk	up
TCEAL9	3.47821	2.47427	69.8071	0.000341423	0.00654498	TCEAL9	pseudobulk	up
SSC4D	3.47468	0.450543	60.5491	0.000488301	0.00746175	SSC4D	pseudobulk	up
SERPING1	3.47321	3.36203	31.735	0.00219027	0.0152029	SERPING1	pseudobulk	up
WHRN	3.47015	1.05257	53.2242	0.00062522	0.00828364	WHRN	pseudobulk	up
RTP4	3.4651	2.30808	146.38	5.48229583983584e-05	0.00274588	RTP4	pseudobulk	up
GRIP2	3.46026	1.41368	54.0021	0.000648456	0.00843905	GRIP2	pseudobulk	up
DENND2D	3.45482	4.80096	157.462	4.53161483889068e-05	0.00253739	DENND2D	pseudobulk	up
TMEM176A	3.44466	3.9369	294.433	9.28659663392366e-06	0.0015739	TMEM176A	pseudobulk	up
HGF	3.43719	3.70038	300.292	8.83119237288725e-06	0.00154771	HGF	pseudobulk	up
ENDOD1	3.42704	0.0742557	30.7502	0.00213278	0.0150042	ENDOD1	pseudobulk	up
CCDC9B	3.39592	5.26592	198.246	2.53439349591947e-05	0.00208243	CCDC9B	pseudobulk	up
ENPP4	3.39566	2.09795	34.0108	0.00187433	0.0141838	ENPP4	pseudobulk	up
TAP1	3.39134	4.21908	90.1497	0.000181971	0.00469311	TAP1	pseudobulk	up
MYO1D	3.39052	3.96643	17.0846	0.00842504	0.0312704	MYO1D	pseudobulk	up
RASGRP3	3.38861	4.99772	69.3433	0.000345982	0.00658446	RASGRP3	pseudobulk	up
NHS	3.38222	0.00351439	33.4416	0.001681	0.0133252	NHS	pseudobulk	up
ANK2	3.38128	0.608546	56.5853	0.000575668	0.00796118	ANK2	pseudobulk	up
CMPK2	3.37908	6.40143	102.732	0.000131717	0.00411749	CMPK2	pseudobulk	up
SLFN5	3.3781	4.31186	233.382	1.6763602483851e-05	0.00184268	SLFN5	pseudobulk	up
CXCR4	3.36974	5.64551	53.4397	0.000648413	0.00843905	CXCR4	pseudobulk	up
CEP170B	3.36221	0.530062	39.4264	0.001207	0.0114081	CEP170B	pseudobulk	up
PLBD1	3.35311	3.91699	82.0807	0.000229208	0.00527542	PLBD1	pseudobulk	up
DAPK1	3.33876	5.86252	13.6416	0.0132637	0.0409585	DAPK1	pseudobulk	up
SAMD9L	3.33341	5.43068	56.4501	0.000568677	0.00794565	SAMD9L	pseudobulk	up
KCNN4	3.33169	2.20134	56.3932	0.000571812	0.00796118	KCNN4	pseudobulk	up
GSDME	3.3144	5.23102	33.8118	0.00189467	0.0142428	GSDME	pseudobulk	up
ENPP3	3.30496	0.331222	18.4044	0.00731201	0.0288161	ENPP3	pseudobulk	up
CDCP1	3.29283	3.53104	230.955	1.72215287919603e-05	0.00184268	CDCP1	pseudobulk	up
ZNF366	3.29142	0.970972	54.5486	0.000633354	0.00834033	ZNF366	pseudobulk	up
RALGDS	3.28788	4.61188	285.421	1.00478316810893e-05	0.00157791	RALGDS	pseudobulk	up
FUT7	3.28757	0.23993	21.4436	0.00461092	0.022197	FUT7	pseudobulk	up
NMRK2	3.28011	0.805814	21.6667	0.00459739	0.0221878	NMRK2	pseudobulk	up
CD14	3.27992	8.0298	343.425	6.26792441134815e-06	0.00152789	CD14	pseudobulk	up
CCSER1	3.27079	1.1622	55.9089	0.000596447	0.00809463	CCSER1	pseudobulk	up
ZNF677	3.25628	0.69186	45.008	0.000995491	0.0103466	ZNF677	pseudobulk	up
CMBL	3.2516	0.310582	39.7858	0.00121128	0.0114185	CMBL	pseudobulk	up
CLEC4F	3.24023	-0.0850141	14.7684	0.00958595	0.0337602	CLEC4F	pseudobulk	up
SAMD4A	3.23796	5.64714	299.472	8.88920647551406e-06	0.00154771	SAMD4A	pseudobulk	up
RAB7B	3.23358	3.3268	34.1451	0.00185303	0.0140914	RAB7B	pseudobulk	up
BTN3A3	3.23201	3.2406	189.422	2.84546441344368e-05	0.0021367	BTN3A3	pseudobulk	up
FCHO2	3.22736	5.40026	331.088	6.88184622076495e-06	0.00153886	FCHO2	pseudobulk	up
MGLL	3.22438	4.14994	178.621	3.29841929534181e-05	0.00223958	MGLL	pseudobulk	up
PDLIM4	3.22251	0.0150346	27.9972	0.00171482	0.0134442	PDLIM4	pseudobulk	up
EPAS1	3.21519	3.77903	87.2338	0.000197374	0.00490616	EPAS1	pseudobulk	up
IFI30	3.20684	7.31385	212.768	2.11894845732038e-05	0.00198253	IFI30	pseudobulk	up
CD83	3.18989	5.08768	248.64	1.42714348778355e-05	0.00178381	CD83	pseudobulk	up
SORCS2	3.18563	1.0514	66.8966	0.000384541	0.00687433	SORCS2	pseudobulk	up
TSPO	3.18349	5.5829	261.298	1.25785908368458e-05	0.0016908	TSPO	pseudobulk	up
CRYBG1	3.18196	3.2948	206.462	2.28827923972545e-05	0.00203032	CRYBG1	pseudobulk	up
VDR	3.17854	0.403056	28.4438	0.00279045	0.0172667	VDR	pseudobulk	up
BCL6	3.1763	2.70239	179.917	3.24268300572897e-05	0.00222721	BCL6	pseudobulk	up
LITAF	3.17457	6.66958	152.871	4.88109396108441e-05	0.00264308	LITAF	pseudobulk	up
CTSD	3.17315	7.27913	93.3088	0.000167118	0.00452468	CTSD	pseudobulk	up
DRAM1	3.17082	3.83614	230.567	1.7289986508115e-05	0.00184268	DRAM1	pseudobulk	up
CAPN2	3.16972	3.56999	210.216	2.18571993465259e-05	0.00199466	CAPN2	pseudobulk	up
IL15	3.16207	1.64721	13.6132	0.01335	0.0410793	IL15	pseudobulk	up
APOE	3.15721	12.2613	62.5763	0.000443731	0.00719617	APOE	pseudobulk	up
CLMN	3.15325	0.835678	61.7039	0.000471395	0.00733218	CLMN	pseudobulk	up
MS4A4E	3.14834	4.2744	305.79	8.42968789569263e-06	0.00154771	MS4A4E	pseudobulk	up
STAT1	3.14116	5.8211	49.6911	0.000771086	0.00912301	STAT1	pseudobulk	up
EFCAB13	3.1355	4.11064	168.251	3.83558739071682e-05	0.0023335	EFCAB13	pseudobulk	up
S1PR1	3.12659	0.190581	15.7239	0.00730071	0.0287838	S1PR1	pseudobulk	up
CCDC170	3.1238	3.28919	178.089	3.32482319380313e-05	0.00223958	CCDC170	pseudobulk	up
TCN2	3.12011	2.5472	138.773	6.24063176351358e-05	0.00287802	TCN2	pseudobulk	up
EYA2	3.11316	4.29432	172.841	3.58378757360454e-05	0.00228721	EYA2	pseudobulk	up
LILRA4	3.11256	3.23824	44.4121	0.00100599	0.0104026	LILRA4	pseudobulk	up
BIRC7	3.11047	4.7704	87.3417	0.000196703	0.00489881	BIRC7	pseudobulk	up
BHLHE40	3.10929	4.14095	159.581	4.38201354129459e-05	0.00249393	BHLHE40	pseudobulk	up
KLHDC8B	3.10637	5.26126	193.574	2.69190346679896e-05	0.00209103	KLHDC8B	pseudobulk	up
LILRA1	3.09321	3.26496	81.4501	0.000233636	0.00528838	LILRA1	pseudobulk	up
AC099489.1	3.08828	1.98067	111.598	0.000107649	0.00376626	AC099489.1	pseudobulk	up
PATL2	3.08455	2.67748	167.874	3.8623377126471e-05	0.0023335	PATL2	pseudobulk	up
FGL2	3.08078	6.43233	152.022	4.94986705730642e-05	0.00265826	FGL2	pseudobulk	up
PLAUR	3.07414	6.58181	317.75	7.64268817590946e-06	0.00154771	PLAUR	pseudobulk	up
TMEM176B	3.06846	5.40534	262.836	1.23924784427607e-05	0.0016908	TMEM176B	pseudobulk	up
OCIAD2	3.06818	1.3535	74.2477	0.000298754	0.00606336	OCIAD2	pseudobulk	up
EGR2	3.06745	1.72097	64.7862	0.000410679	0.00702417	EGR2	pseudobulk	up
PPFIBP1	3.06618	2.48234	84.0083	0.00021679	0.00509837	PPFIBP1	pseudobulk	up
DBI	3.05164	4.20175	161.094	4.27908284673218e-05	0.00247089	DBI	pseudobulk	up
MCTP1	3.04521	5.14637	214.755	2.06975439331325e-05	0.00198253	MCTP1	pseudobulk	up
CCL8	3.03267	4.22078	68.6569	0.000354515	0.00660917	CCL8	pseudobulk	up
KLF10	3.02522	3.07948	198.209	2.53721058947903e-05	0.00208243	KLF10	pseudobulk	up
LRRC63	3.02294	0.124087	28.3637	0.00279804	0.0172781	LRRC63	pseudobulk	up
GATA3	3.01435	1.61864	23.8971	0.00417041	0.02107	GATA3	pseudobulk	up
NPIPB15	3.01257	1.64335	26.9365	0.00320729	0.0184375	NPIPB15	pseudobulk	up
EDNRB	3.00355	0.957139	20.5409	0.00579016	0.0251885	EDNRB	pseudobulk	up
BLVRA	3.00229	4.02022	41.7237	0.00116449	0.0112002	BLVRA	pseudobulk	up
NIBAN1	3.00131	2.32834	141.706	5.91374203636607e-05	0.00280913	NIBAN1	pseudobulk	up
CDCA7L	3.00026	3.41233	76.5829	0.000271656	0.00572715	CDCA7L	pseudobulk	up
PAX3	2.99747	1.94076	75.8716	0.000280326	0.00581996	PAX3	pseudobulk	up
SLAMF7	2.99093	2.62419	32.5844	0.00206521	0.0147677	SLAMF7	pseudobulk	up
TLR2	2.99077	6.70107	307.362	8.31870295171563e-06	0.00154771	TLR2	pseudobulk	up
BATF2	2.99023	0.746466	44.0733	0.00103284	0.0105246	BATF2	pseudobulk	up
BBC3	2.98661	3.8211	162.805	4.16733769361441e-05	0.00241935	BBC3	pseudobulk	up
DYSF	2.98454	3.42317	12.8253	0.0149662	0.0442175	DYSF	pseudobulk	up
PLEK2	2.98329	0.577283	38.5396	0.00141988	0.012353	PLEK2	pseudobulk	up
KIAA0040	2.9821	1.71962	51.6894	0.00070792	0.00875673	KIAA0040	pseudobulk	up
LDLRAD3	2.98054	2.02963	109.243	0.000113466	0.00384262	LDLRAD3	pseudobulk	up
TNNI2	2.9799	3.02294	127.43	7.70838596572108e-05	0.00315784	TNNI2	pseudobulk	up
RAB42	2.97212	4.3662	34.9103	0.00176074	0.0136889	RAB42	pseudobulk	up
ATF3	2.97137	2.08064	97.8323	0.000149219	0.00428327	ATF3	pseudobulk	up
IQGAP2	2.96809	4.97595	99.104	0.000143994	0.00423577	IQGAP2	pseudobulk	up
GNG12	2.96541	1.33079	58.4872	0.000530559	0.00774474	GNG12	pseudobulk	up
FAM218A	2.95889	0.443976	46.8393	0.000909197	0.00988752	FAM218A	pseudobulk	up
EPSTI1	2.95535	6.61296	71.0545	0.000326038	0.00639392	EPSTI1	pseudobulk	up
METRNL	2.95423	5.71577	217.79	1.99738955487399e-05	0.00195984	METRNL	pseudobulk	up
PIR	2.94476	2.29043	102.412	0.000132949	0.00412109	PIR	pseudobulk	up
PRSS36	2.94174	4.06135	116.573	9.62179452776454e-05	0.00357449	PRSS36	pseudobulk	up
PGM5	2.93903	2.54639	108.967	0.000113953	0.00384262	PGM5	pseudobulk	up
ARHGEF16	2.92382	1.35285	30.0605	0.00251044	0.0163235	ARHGEF16	pseudobulk	up
B2M	2.92352	7.43525	314.674	7.83461247269348e-06	0.00154771	B2M	pseudobulk	up
DPEP2	2.91664	4.87782	133.734	6.82720768914794e-05	0.00297977	DPEP2	pseudobulk	up
WIPF3	2.91585	2.14291	14.0281	0.0126516	0.0398082	WIPF3	pseudobulk	up
ZNF439	2.90112	1.91854	104.676	0.00012616	0.00403527	ZNF439	pseudobulk	up
LILRA5	2.89606	1.26346	18.0634	0.00755582	0.029305	LILRA5	pseudobulk	up
DPEP3	2.89316	0.106974	12.5958	0.0155981	0.0452947	DPEP3	pseudobulk	up
HESX1	2.89303	2.39279	57.7995	0.000537876	0.00780706	HESX1	pseudobulk	up
TXK	2.86785	0.229457	30.6793	0.00232926	0.0157157	TXK	pseudobulk	up
ZNF438	2.85948	4.10406	239.671	1.56686465103761e-05	0.00180952	ZNF438	pseudobulk	up
PARP12	2.85917	5.62201	68.5644	0.000355601	0.00661996	PARP12	pseudobulk	up
CNN2	2.85392	0.773756	43.6717	0.00106281	0.0106891	CNN2	pseudobulk	up
MELTF	2.85083	3.51836	90.4694	0.000180398	0.00468406	MELTF	pseudobulk	up
RGS1	2.84646	6.60612	277.675	1.07755645582787e-05	0.00159797	RGS1	pseudobulk	up
ITGB8	2.84606	0.615697	42.2732	0.00113929	0.0111536	ITGB8	pseudobulk	up
CCRL2	2.8438	2.48134	28.6699	0.00275593	0.0171936	CCRL2	pseudobulk	up
IFIH1	2.83859	5.0477	136.399	6.49808338989588e-05	0.00291023	IFIH1	pseudobulk	up
NR1I2	2.83628	0.0631157	33.2986	0.00198036	0.0145027	NR1I2	pseudobulk	up
METTL7B	2.83558	0.395491	20.2569	0.0057436	0.0250766	METTL7B	pseudobulk	up
WARS	2.83467	5.67886	56.8844	0.000558307	0.00791087	WARS	pseudobulk	up
TCHH	2.82922	0.823425	49.0411	0.00081259	0.00939265	TCHH	pseudobulk	up
ASB9	2.82913	0.363905	36.4143	0.00162813	0.0131236	ASB9	pseudobulk	up
CAPG	2.82714	8.00033	68.6688	0.000354281	0.00660917	CAPG	pseudobulk	up
APOL1	2.82636	2.78481	114.154	0.000101434	0.00363906	APOL1	pseudobulk	up
UBE2L6	2.81303	5.3058	246.247	1.46259052032159e-05	0.00178381	UBE2L6	pseudobulk	up
OSGIN1	2.81162	2.068	104.285	0.000127156	0.00404729	OSGIN1	pseudobulk	up
RRAGD	2.80584	3.64432	34.1183	0.00185606	0.0140914	RRAGD	pseudobulk	up
ZNF681	2.80557	-0.168807	17.1455	0.00817855	0.0308023	ZNF681	pseudobulk	up
OPTN	2.80516	3.05489	41.6738	0.00117084	0.0112349	OPTN	pseudobulk	up
MICAL2	2.80424	4.20092	155.541	4.67393394179366e-05	0.00258453	MICAL2	pseudobulk	up
IGF2R	2.79605	4.89136	136.411	6.49663467591821e-05	0.00291023	IGF2R	pseudobulk	up
CD38	2.78437	2.46394	11.7287	0.0177669	0.0493841	CD38	pseudobulk	up
CCL3	2.78296	3.92636	109.422	0.000112646	0.00384262	CCL3	pseudobulk	up
C1orf127	2.76186	2.49146	119.576	9.0385526128926e-05	0.00345476	C1orf127	pseudobulk	up
PRXL2B	2.7581	3.43166	101.434	0.000135974	0.00413626	PRXL2B	pseudobulk	up
MCUB	2.75634	2.14633	113.958	0.000101979	0.00363906	MCUB	pseudobulk	up
PDE6G	2.75371	0.537271	38.3022	0.00144601	0.0124659	PDE6G	pseudobulk	up
GPR155	2.75177	2.69845	133.188	6.90412369118403e-05	0.00300329	GPR155	pseudobulk	up
HSF4	2.75034	4.10422	230.692	1.7263556753123e-05	0.00184268	HSF4	pseudobulk	up
MYO1A	2.74828	2.37428	69.9727	0.000338733	0.00651985	MYO1A	pseudobulk	up
VAMP5	2.74745	2.13702	105.994	0.000122121	0.0039972	VAMP5	pseudobulk	up
SOX14	2.74386	3.77459	28.5625	0.00277773	0.0172322	SOX14	pseudobulk	up
GSDMA	2.74184	1.72504	73.0898	0.00030503	0.00614297	GSDMA	pseudobulk	up
HSD3B7	2.74148	2.80358	83.7838	0.000217999	0.00509837	HSD3B7	pseudobulk	up
PHLDB1	2.74144	3.28785	59.6711	0.000497771	0.00751906	PHLDB1	pseudobulk	up
CAPN11	2.7336	0.0490193	12.4739	0.0155162	0.0451879	CAPN11	pseudobulk	up
DIRAS1	2.73215	1.05959	12.5655	0.0156247	0.045352	DIRAS1	pseudobulk	up
LILRB2	2.72984	4.81188	131.679	7.09701657054926e-05	0.00303083	LILRB2	pseudobulk	up
FBXO6	2.72114	1.2009	65.4089	0.000402033	0.0069848	FBXO6	pseudobulk	up
DACT1	2.71698	0.178757	19.0043	0.00661605	0.0271337	DACT1	pseudobulk	up
EPHX1	2.71069	5.10333	109.156	0.000113306	0.00384262	EPHX1	pseudobulk	up
NPM2	2.70842	0.230506	19.2588	0.00663142	0.0271797	NPM2	pseudobulk	up
P2RY8	2.70786	1.24026	30.2689	0.00244733	0.0161324	P2RY8	pseudobulk	up
ALDH5A1	2.7032	0.548526	24.8001	0.00381995	0.0200916	ALDH5A1	pseudobulk	up
FLNA	2.70004	1.62141	73.9235	0.000297553	0.00606336	FLNA	pseudobulk	up
PLEKHH1	2.68666	2.56194	59.8395	0.000494623	0.0074969	PLEKHH1	pseudobulk	up
PLXNC1	2.6757	5.39822	190.757	2.79350169311347e-05	0.00212742	PLXNC1	pseudobulk	up
LILRB1	2.667	5.64556	33.6092	0.00192088	0.0142835	LILRB1	pseudobulk	up
PODXL2	2.66631	-0.0115299	11.8944	0.0148335	0.0439811	PODXL2	pseudobulk	up
FXYD5	2.66379	6.71472	190.473	2.80395469825596e-05	0.00212742	FXYD5	pseudobulk	up
CHI3L1	2.65993	2.95424	89.9109	0.000183194	0.00471536	CHI3L1	pseudobulk	up
PARVB	2.65222	3.88555	127.332	7.71916978228193e-05	0.00315784	PARVB	pseudobulk	up
DAGLA	2.65216	2.89207	55.1177	0.000602383	0.00812097	DAGLA	pseudobulk	up
CD209	2.6486	4.64686	113.91	0.00010191	0.00363906	CD209	pseudobulk	up
ST14	2.63653	4.02507	139.529	6.13943696306957e-05	0.00286136	ST14	pseudobulk	up
EPHB6	2.63557	1.40344	56.6657	0.000566306	0.00793801	EPHB6	pseudobulk	up
SLC7A1	2.6311	2.62875	33.2673	0.00196706	0.0144446	SLC7A1	pseudobulk	up
TNFRSF14	2.63002	7.21291	145.875	5.49052045162044e-05	0.00274588	TNFRSF14	pseudobulk	up
AGRN	2.62541	4.24209	54.2306	0.000626054	0.00828364	AGRN	pseudobulk	up
CHI3L2	2.62326	0.704568	46.484	0.000914417	0.00992905	CHI3L2	pseudobulk	up
NHLRC1	2.62155	0.613707	20.2329	0.00597976	0.0256107	NHLRC1	pseudobulk	up
CACNA2D4	2.61812	4.32159	153.782	4.80923154188214e-05	0.00262596	CACNA2D4	pseudobulk	up
RCAN3	2.61371	3.08812	158.855	4.43365141918281e-05	0.00250473	RCAN3	pseudobulk	up
CPM	2.61036	5.40231	73.6676	0.00029857	0.00606336	CPM	pseudobulk	up
INPP1	2.60817	1.39777	67.5238	0.000372261	0.00675661	INPP1	pseudobulk	up
GSTT2B	2.6081	0.359617	14.9397	0.0111034	0.0366449	GSTT2B	pseudobulk	up
AGPAT4	2.60195	3.44406	166.304	3.94995898415674e-05	0.00236454	AGPAT4	pseudobulk	up
ARHGEF5	2.59848	0.192009	22.4868	0.00464936	0.0222657	ARHGEF5	pseudobulk	up
PNPLA7	2.59267	5.28679	259.164	1.28436149044208e-05	0.0016908	PNPLA7	pseudobulk	up
XAF1	2.58687	6.90149	81.3093	0.000234513	0.00529479	XAF1	pseudobulk	up
IQGAP1	2.57851	4.56379	84.8442	0.000211254	0.00502161	IQGAP1	pseudobulk	up
TMEM255A	2.56096	1.10148	52.3195	0.0006903	0.00865361	TMEM255A	pseudobulk	up
LIPA	2.55831	6.24431	24.2902	0.00397881	0.0205556	LIPA	pseudobulk	up
STX11	2.55818	3.86521	118.035	9.32747080813995e-05	0.00351802	STX11	pseudobulk	up
SLC17A9	2.55709	4.60312	230.137	1.73677467542368e-05	0.00184268	SLC17A9	pseudobulk	up
EFCAB6	2.55584	0.458822	29.4948	0.00258427	0.016605	EFCAB6	pseudobulk	up
SLC22A15	2.55162	4.30355	198.5	2.52626169081146e-05	0.00208243	SLC22A15	pseudobulk	up
GADD45G	2.54626	2.59775	40.6205	0.00124002	0.0115544	GADD45G	pseudobulk	up
DHDH	2.54497	2.17943	64.3272	0.000415441	0.00703826	DHDH	pseudobulk	up
TGIF1	2.54479	4.00036	33.1408	0.00198363	0.0145133	TGIF1	pseudobulk	up
DOP1B	2.54306	4.0323	144.383	5.63466303272897e-05	0.00276563	DOP1B	pseudobulk	up
HK3	2.53491	5.41722	251.602	1.38477002604926e-05	0.00177169	HK3	pseudobulk	up
PPA1	2.52947	0.711657	20.1948	0.00599078	0.0256495	PPA1	pseudobulk	up
BIRC3	2.52289	0.10329	26.9364	0.00322008	0.0184794	BIRC3	pseudobulk	up
CBR1	2.52225	2.09658	80.525	0.00024043	0.00533606	CBR1	pseudobulk	up
GIMAP7	2.52019	3.72948	52.3182	0.00068213	0.0085926	GIMAP7	pseudobulk	up
ARRDC4	2.51854	1.76358	67.7912	0.000366353	0.00668658	ARRDC4	pseudobulk	up
GPR65	2.51718	4.27221	169.734	3.75127344930517e-05	0.00231474	GPR65	pseudobulk	up
PLA2G4C	2.51523	2.2695	32.0698	0.00213931	0.0150339	PLA2G4C	pseudobulk	up
SLC2A9	2.51054	4.69553	111.772	0.000106828	0.00375771	SLC2A9	pseudobulk	up
HES1	2.50644	1.74497	36.9169	0.00155123	0.0128517	HES1	pseudobulk	up
SELENOM	2.49745	3.37817	132.13	7.03786220313457e-05	0.00303083	SELENOM	pseudobulk	up
PCBD1	2.49586	2.91554	78.2542	0.000257699	0.00554946	PCBD1	pseudobulk	up
SP110	2.49054	5.7589	81.0948	0.000236039	0.00532006	SP110	pseudobulk	up
ARHGAP8	2.49048	3.52604	105.842	0.000122343	0.0039972	ARHGAP8	pseudobulk	up
LPIN3	2.48549	2.81428	117.212	9.4945887285139e-05	0.00356047	LPIN3	pseudobulk	up
ZNF618	2.48124	5.73471	167.326	3.88838827532422e-05	0.00233841	ZNF618	pseudobulk	up
S100A9	2.47958	3.9415	59.3334	0.000504554	0.00756567	S100A9	pseudobulk	up
AP1S2	2.47741	3.54565	170.522	3.70811677373293e-05	0.00230433	AP1S2	pseudobulk	up
KIAA1614	2.47633	2.42178	64.4869	0.000412901	0.00703826	KIAA1614	pseudobulk	up
GYPC	2.47285	4.35241	33.6474	0.00191595	0.0142835	GYPC	pseudobulk	up
IFI35	2.47081	5.11276	42.0376	0.00114411	0.01117	IFI35	pseudobulk	up
SLC43A3	2.46867	4.53328	211.94	2.14012853995591e-05	0.00198253	SLC43A3	pseudobulk	up
TRPC1	2.46612	0.0985814	21.8052	0.00510733	0.0235848	TRPC1	pseudobulk	up
CABP4	2.46148	3.17235	137.825	6.33283626124429e-05	0.00287956	CABP4	pseudobulk	up
ZNF563	2.45997	1.78643	64.6737	0.000410493	0.00702417	ZNF563	pseudobulk	up
SLC16A6	2.45136	0.871203	39.8628	0.00130937	0.011913	SLC16A6	pseudobulk	up
NR1H3	2.44817	5.68186	66.2228	0.000386888	0.00689872	NR1H3	pseudobulk	up
SDSL	2.44075	3.85606	175.9	3.42863944901223e-05	0.00223958	SDSL	pseudobulk	up
ANKRD33B	2.44051	0.675238	30.2039	0.00248267	0.0162282	ANKRD33B	pseudobulk	up
GCLM	2.44013	0.30924	25.5107	0.00362791	0.0195745	GCLM	pseudobulk	up
NT5C3B	2.43731	3.35537	145.66	5.51279903393103e-05	0.00274588	NT5C3B	pseudobulk	up
AL160269.1	2.43128	0.250231	15.987	0.00976253	0.0339849	AL160269.1	pseudobulk	up
XYLT1	2.42845	3.4062	52.0593	0.000690282	0.00865361	XYLT1	pseudobulk	up
FAM50B	2.42759	2.94273	61.1723	0.00046887	0.00731908	FAM50B	pseudobulk	up
VMP1	2.42244	5.91715	225.26	1.83363332966593e-05	0.00189912	VMP1	pseudobulk	up
TSTD1	2.42084	2.45956	104.994	0.000124884	0.004034	TSTD1	pseudobulk	up
SYNE2	2.4172	1.61773	16.4741	0.0091145	0.032686	SYNE2	pseudobulk	up
ANKRD6	2.41036	2.33057	25.0774	0.00371061	0.0197599	ANKRD6	pseudobulk	up
SPINT1	2.40827	4.49223	75.613	0.000280167	0.00581996	SPINT1	pseudobulk	up
MFSD2A	2.40583	2.47444	89.0304	0.000187749	0.00476678	MFSD2A	pseudobulk	up
PPP1R15A	2.40013	4.25061	102.749	0.000131668	0.00411749	PPP1R15A	pseudobulk	up
VMO1	2.39943	4.13892	37.0667	0.0015336	0.0128127	VMO1	pseudobulk	up
ZNF804A	2.39881	1.23644	21.033	0.00544744	0.024446	ZNF804A	pseudobulk	up
CD69	2.39569	1.45436	23.9351	0.00411416	0.0209298	CD69	pseudobulk	up
C1orf54	2.39025	3.58872	156.996	4.56582182429668e-05	0.00253739	C1orf54	pseudobulk	up
TANC2	2.38946	5.73257	138.61	6.24122560875941e-05	0.00287802	TANC2	pseudobulk	up
AHR	2.38706	4.28269	56.1414	0.000576214	0.00796118	AHR	pseudobulk	up
GAS2L3	2.38589	3.10964	112.067	0.000106149	0.0037439	GAS2L3	pseudobulk	up
CHCHD2	2.38557	3.83405	20.1911	0.00593343	0.0255488	CHCHD2	pseudobulk	up
STAP2	2.38455	0.178522	25.816	0.00351629	0.0192401	STAP2	pseudobulk	up
CASP7	2.38445	2.67765	85.575	0.000206924	0.0049639	CASP7	pseudobulk	up
IRF7	2.38329	5.97315	40.8505	0.00122336	0.011469	IRF7	pseudobulk	up
PARP14	2.37713	7.04665	48.3599	0.000822396	0.00943963	PARP14	pseudobulk	up
NADK	2.37642	5.58276	163.921	4.09517712037975e-05	0.00240921	NADK	pseudobulk	up
HERC5	2.3754	4.28744	29.078	0.00266809	0.0168878	HERC5	pseudobulk	up
PARP9	2.37274	4.32292	29.707	0.00254255	0.0164421	PARP9	pseudobulk	up
SLC22A18AS	2.37206	2.15462	36.2698	0.00161358	0.0130728	SLC22A18AS	pseudobulk	up
KLHL3	2.37064	1.03461	46.1332	0.000926409	0.00994213	KLHL3	pseudobulk	up
ESRRB	2.37046	0.807614	32.6124	0.00208178	0.0148171	ESRRB	pseudobulk	up
KCNH4	2.36572	0.413183	32.9631	0.00203252	0.0146345	KCNH4	pseudobulk	up
GCNT1	2.36366	-0.100144	13.5316	0.0135889	0.041511	GCNT1	pseudobulk	up
LONRF1	2.35976	1.94219	85.1762	0.000209426	0.00499635	LONRF1	pseudobulk	up
CLIC4	2.35729	2.51159	92.3028	0.000171752	0.00456804	CLIC4	pseudobulk	up
TRPV4	2.35686	5.12581	63.39	0.000430099	0.00713442	TRPV4	pseudobulk	up
SELENOP	2.35609	5.88953	22.8522	0.00454585	0.022053	SELENOP	pseudobulk	up
CSGALNACT2	2.34954	4.5376	140.13	6.07316181651596e-05	0.00284067	CSGALNACT2	pseudobulk	up
CSTB	2.34809	4.68065	41.2612	0.00119513	0.0113428	CSTB	pseudobulk	up
TAP2	2.34693	4.49229	63.0907	0.000435056	0.00716854	TAP2	pseudobulk	up
NME8	2.34565	2.04639	37.1101	0.00153135	0.0128127	NME8	pseudobulk	up
CPPED1	2.33935	4.22744	50.9705	0.000725866	0.00886944	CPPED1	pseudobulk	up
PDE3A	2.33734	0.0263065	11.7565	0.0168027	0.0476375	PDE3A	pseudobulk	up
FTL	2.33408	9.21253	211.247	2.15781127788871e-05	0.00198306	FTL	pseudobulk	up
ABCC3	2.33362	5.16284	147.572	5.33355370294442e-05	0.00274588	ABCC3	pseudobulk	up
DOC2A	2.32994	3.83959	148.126	5.28431472401342e-05	0.00274588	DOC2A	pseudobulk	up
PMP22	2.32918	4.37054	147.477	5.34247532356158e-05	0.00274588	PMP22	pseudobulk	up
NEK8	2.3248	1.40786	54.4056	0.000623507	0.00828364	NEK8	pseudobulk	up
KCNJ5	2.32278	5.30503	201.043	2.44605255012828e-05	0.0020683	KCNJ5	pseudobulk	up
ACKR3	2.31982	2.40602	87.8637	0.000193963	0.00486167	ACKR3	pseudobulk	up
SAMD9	2.31487	3.95243	59.9458	0.000492209	0.00747768	SAMD9	pseudobulk	up
SDCBP	2.30721	4.43375	138.202	6.28779639201927e-05	0.00287956	SDCBP	pseudobulk	up
RAB24	2.30182	2.70467	65.7489	0.000393828	0.00693583	RAB24	pseudobulk	up
CDK6	2.30123	3.38357	95.3912	0.000158269	0.00440956	CDK6	pseudobulk	up
PLIN2	2.30116	1.98285	72.127	0.000314768	0.00627996	PLIN2	pseudobulk	up
VAT1	2.29963	5.44088	38.2762	0.00142352	0.0123654	VAT1	pseudobulk	up
SLC25A43	2.29653	2.38339	92.8248	0.000169385	0.00452967	SLC25A43	pseudobulk	up
FKBP9	2.29351	1.78119	72.3011	0.000312876	0.00627193	FKBP9	pseudobulk	up
CD82	2.28968	4.34326	100.434	0.000139319	0.00417638	CD82	pseudobulk	up
DNASE1L1	2.27847	4.75533	81.5884	0.000232556	0.00528838	DNASE1L1	pseudobulk	up
GGACT	2.276	1.24651	36.6559	0.0015769	0.0129751	GGACT	pseudobulk	up
CD6	2.27482	3.20553	73.2541	0.000302737	0.00612491	CD6	pseudobulk	up
TMEM14A	2.27446	1.14319	33.054	0.00200277	0.0145411	TMEM14A	pseudobulk	up
EIF2AK2	2.27353	5.86525	62.1183	0.000451677	0.00719617	EIF2AK2	pseudobulk	up
FHIT	2.27328	3.002	20.2001	0.00592823	0.0255409	FHIT	pseudobulk	up
CCL5	2.26692	2.10608	18.6302	0.007045	0.0282028	CCL5	pseudobulk	up
ZBTB42	2.26538	2.39999	56.6337	0.000564487	0.00793801	ZBTB42	pseudobulk	up
CD63	2.26131	6.83831	79.2029	0.000250097	0.00549455	CD63	pseudobulk	up
SIGLEC7	2.25739	4.3919	80.5546	0.00023995	0.00533606	SIGLEC7	pseudobulk	up
MT1X	2.2569	0.236109	14.7611	0.0114611	0.0374086	MT1X	pseudobulk	up
TMEM144	2.25029	4.45222	57.7682	0.000538021	0.00780706	TMEM144	pseudobulk	up
CBLN3	2.24992	0.790029	39.2594	0.00134986	0.01213	CBLN3	pseudobulk	up
TFAP2E	2.24736	1.26539	42.7686	0.00110456	0.0109783	TFAP2E	pseudobulk	up
PDPN	2.24477	3.78875	85.6522	0.000206401	0.0049639	PDPN	pseudobulk	up
FCGR2A	2.24349	7.14283	204.646	2.33845081909535e-05	0.00203502	FCGR2A	pseudobulk	up
FTH1	2.24334	9.45585	242.289	1.52398281442566e-05	0.001808	FTH1	pseudobulk	up
APOC4	2.24202	2.57606	75.485	0.00028141	0.00581996	APOC4	pseudobulk	up
S100A8	2.24007	1.36685	21.1914	0.00540077	0.0243371	S100A8	pseudobulk	up
TUBB6	2.23723	2.2537	58.8248	0.000515503	0.00762702	TUBB6	pseudobulk	up
BTN3A1	2.23546	3.29525	72.4968	0.000310506	0.006234	BTN3A1	pseudobulk	up
PSMB8	2.23512	4.23381	159.381	4.39542498352572e-05	0.00249393	PSMB8	pseudobulk	up
ZNF626	2.2279	1.59358	56.1914	0.00057631	0.00796118	ZNF626	pseudobulk	up
SHISA5	2.22745	3.15318	85.9717	0.000204535	0.00494413	SHISA5	pseudobulk	up
SLC36A1	2.22728	5.45253	31.4803	0.00222989	0.0153887	SLC36A1	pseudobulk	up
TNFSF13	2.22454	6.84323	144.351	5.63721561351911e-05	0.00276563	TNFSF13	pseudobulk	up
PECAM1	2.22409	5.98274	75.2771	0.000283217	0.00582963	PECAM1	pseudobulk	up
CD37	2.21933	6.74459	95.3366	0.000158474	0.00440956	CD37	pseudobulk	up
BLOC1S2	2.21066	3.50555	46.7309	0.000891965	0.00984706	BLOC1S2	pseudobulk	up
MMP19	2.20539	0.186435	18.9386	0.00686393	0.0277423	MMP19	pseudobulk	up
SLC2A3	2.20293	1.41339	26.4685	0.00329907	0.0186795	SLC2A3	pseudobulk	up
PADI2	2.19519	4.48534	100.483	0.000139149	0.00417638	PADI2	pseudobulk	up
C2	2.1947	5.49785	121.319	8.70922750686861e-05	0.00336772	C2	pseudobulk	up
HPSE	2.19364	5.64672	51.39	0.000711807	0.00877457	HPSE	pseudobulk	up
SLC31A2	2.19253	2.8759	102.859	0.000131351	0.00411749	SLC31A2	pseudobulk	up
PRXL2A	2.1921	4.23744	71.6597	0.00031939	0.00631597	PRXL2A	pseudobulk	up
ATF5	2.19153	4.38009	130.066	7.31907273658699e-05	0.00306134	ATF5	pseudobulk	up
RAP2B	2.19019	7.328	65.3992	0.000398802	0.00696788	RAP2B	pseudobulk	up
ASAH1	2.18582	7.04097	38.4655	0.0014073	0.0123183	ASAH1	pseudobulk	up
SUSD1	2.18516	5.22305	127.11	7.75197796408032e-05	0.00316135	SUSD1	pseudobulk	up
ARHGEF10	2.17883	1.65789	46.4289	0.000906855	0.00988679	ARHGEF10	pseudobulk	up
CLEC9A	2.17139	2.61056	12.5073	0.0157099	0.0455283	CLEC9A	pseudobulk	up
RELB	2.16347	3.7722	136.356	6.5035324553789e-05	0.00291023	RELB	pseudobulk	up
SYNE1	2.16277	1.48628	52.7262	0.000670817	0.00854064	SYNE1	pseudobulk	up
CYP2S1	2.15881	2.08081	31.0468	0.00230282	0.0156468	CYP2S1	pseudobulk	up
VSIG10L	2.1581	2.10143	64.1448	0.000418224	0.00704866	VSIG10L	pseudobulk	up
ALDH3B1	2.15514	4.32548	57.2531	0.000549722	0.00785747	ALDH3B1	pseudobulk	up
RGS16	2.15463	2.12176	47.8905	0.000843716	0.00955731	RGS16	pseudobulk	up
GALNT6	2.14311	3.45238	111.621	0.000107198	0.00376058	GALNT6	pseudobulk	up
CFB	2.14238	3.81549	143.349	5.73716946361627e-05	0.00278314	CFB	pseudobulk	up
NEU3	2.14108	3.20067	113.887	0.000101977	0.00363906	NEU3	pseudobulk	up
VSIG10	2.14035	2.19157	52.5768	0.000674485	0.00855396	VSIG10	pseudobulk	up
ZNF311	2.13681	0.714416	27.2485	0.00310508	0.0181873	ZNF311	pseudobulk	up
GRIN3A	2.13666	0.157643	12.7083	0.0153417	0.0448297	GRIN3A	pseudobulk	up
SQOR	2.13589	4.82403	65.8814	0.000391775	0.00693015	SQOR	pseudobulk	up
PLA2G7	2.11823	5.87732	15.8583	0.00981239	0.0340473	PLA2G7	pseudobulk	up
EPS8L1	2.11496	1.87858	36.4674	0.0015936	0.0130451	EPS8L1	pseudobulk	up
MYO10	2.11063	2.94535	69.2686	0.000346938	0.00658446	MYO10	pseudobulk	up
DHRS4	2.10996	0.3613	23.9104	0.00415918	0.0210296	DHRS4	pseudobulk	up
ZNF844	2.10386	0.428491	17.3371	0.00824011	0.0309182	ZNF844	pseudobulk	up
CD93	2.09932	5.3025	136.803	6.44993987277061e-05	0.00291023	CD93	pseudobulk	up
TMEM204	2.09856	-0.104072	16.3669	0.00929887	0.0331468	TMEM204	pseudobulk	up
NUP210	2.0985	3.91726	115.743	9.79383324823385e-05	0.00357616	NUP210	pseudobulk	up
ZNF880	2.09422	0.731647	20.6054	0.00569847	0.0250219	ZNF880	pseudobulk	up
APOL6	2.09307	5.52243	92.9751	0.000168604	0.00452967	APOL6	pseudobulk	up
AVPI1	2.09295	2.30481	59.1093	0.000509446	0.00758713	AVPI1	pseudobulk	up
CTSZ	2.09021	8.28744	80.1294	0.00024307	0.00538417	CTSZ	pseudobulk	up
CHIT1	2.08222	4.36264	39.307	0.0013383	0.0120697	CHIT1	pseudobulk	up
PRKN	2.08183	3.77114	85.1645	0.000209311	0.00499635	PRKN	pseudobulk	up
STK32B	2.08155	2.91206	35.4802	0.00169656	0.0133777	STK32B	pseudobulk	up
SCO2	2.08081	6.31044	13.3909	0.0137558	0.0418835	SCO2	pseudobulk	up
FARP1	2.08044	5.23959	64.0349	0.000419693	0.00704866	FARP1	pseudobulk	up
CXCL1	2.08044	2.03539	28.5515	0.00278383	0.017242	CXCL1	pseudobulk	up
PPP1R3B	2.08036	2.3913	80.9405	0.000237273	0.0053237	PPP1R3B	pseudobulk	up
PKD1L3	2.08004	0.164608	18.0691	0.00757166	0.0293379	PKD1L3	pseudobulk	up
CD163	2.07998	7.10034	92.023	0.000172942	0.00457787	CD163	pseudobulk	up
AZI2	2.07667	4.41876	98.0074	0.000148012	0.00427458	AZI2	pseudobulk	up
TNFSF15	2.07154	2.1333	33.3005	0.0019627	0.0144446	TNFSF15	pseudobulk	up
ZNF347	2.06741	1.50911	36.3975	0.00160092	0.0130493	ZNF347	pseudobulk	up
SCN1B	2.06739	5.43959	121.282	8.7158044680948e-05	0.00336772	SCN1B	pseudobulk	up
SYTL3	2.06738	3.08494	73.4611	0.000300679	0.00609296	SYTL3	pseudobulk	up
CAST	2.06604	5.44838	131.604	7.10676503847783e-05	0.00303083	CAST	pseudobulk	up
LGALS9	2.06568	5.30844	172.657	3.59294097593122e-05	0.00228721	LGALS9	pseudobulk	up
SH3PXD2B	2.061	2.99172	68.4746	0.000356816	0.00662369	SH3PXD2B	pseudobulk	up
DOK2	2.05765	3.31793	25.8927	0.00345657	0.0191137	DOK2	pseudobulk	up
SLC31A1	2.05256	3.43571	76.8787	0.000269046	0.00569052	SLC31A1	pseudobulk	up
TNK2	2.05168	6.42369	188.423	2.88167457897121e-05	0.0021367	TNK2	pseudobulk	up
BTN3A2	2.05049	3.63923	56.8176	0.000559916	0.00791379	BTN3A2	pseudobulk	up
IRF9	2.04718	5.22848	75.8337	0.000278168	0.00581996	IRF9	pseudobulk	up
STARD13	2.04587	5.63198	51.446	0.000709966	0.00877373	STARD13	pseudobulk	up
TNF	2.04572	2.37749	41.8095	0.00115932	0.0112002	TNF	pseudobulk	up
IL1B	2.04466	5.2594	23.6298	0.00422629	0.0212291	IL1B	pseudobulk	up
BCAT2	2.04453	3.84255	64.233	0.00041659	0.0070421	BCAT2	pseudobulk	up
GPD2	2.04356	3.62134	125.609	7.98623231204193e-05	0.00321668	GPD2	pseudobulk	up
TMEM37	2.04331	3.25048	24.1883	0.00401592	0.0206715	TMEM37	pseudobulk	up
PARP3	2.04133	2.61489	87.5038	0.000195872	0.00488743	PARP3	pseudobulk	up
EMP3	2.04122	3.88051	103.264	0.000130049	0.0041093	EMP3	pseudobulk	up
DCBLD1	2.04112	2.32878	62.4512	0.000446077	0.00719617	DCBLD1	pseudobulk	up
NPHP1	2.0391	0.967588	23.765	0.00418976	0.0210944	NPHP1	pseudobulk	up
CACNA1F	2.03147	0.633898	21.8172	0.00505254	0.0234277	CACNA1F	pseudobulk	up
HERC6	2.03039	3.95814	14.1403	0.0123553	0.0391604	HERC6	pseudobulk	up
CDKN2B	2.03029	2.53192	14.9472	0.0110609	0.0366045	CDKN2B	pseudobulk	up
DYRK4	2.02904	4.53496	115.663	9.81045654997043e-05	0.00357616	DYRK4	pseudobulk	up
CCER2	2.02813	1.13033	34.2792	0.00183889	0.0140009	CCER2	pseudobulk	up
SEMA4A	2.0281	1.57778	37.2879	0.00151406	0.012757	SEMA4A	pseudobulk	up
BCL3	2.02729	3.32092	109.941	0.000111321	0.00383308	BCL3	pseudobulk	up
PDGFC	2.02613	3.04619	31.8838	0.00216646	0.0150947	PDGFC	pseudobulk	up
SNX20	2.02298	3.93099	128.039	7.61251056292644e-05	0.0031378	SNX20	pseudobulk	up
CTSL	2.02179	5.93235	144.441	5.62835301168971e-05	0.00276563	CTSL	pseudobulk	up
SMPDL3A	2.02155	4.61022	15.1676	0.0107383	0.0360338	SMPDL3A	pseudobulk	up
FMNL2	2.02061	7.21557	191.72	2.75806713267622e-05	0.00211885	FMNL2	pseudobulk	up
CTSH	2.0198	6.46765	163.868	4.09841920021835e-05	0.00240921	CTSH	pseudobulk	up
OAF	2.01948	1.91307	38.6272	0.00139452	0.0122714	OAF	pseudobulk	up
APOBR	2.01	6.69518	54.1746	0.00062756	0.00828912	APOBR	pseudobulk	up
DENND1B	2.0082	3.30733	104.999	0.000124788	0.004034	DENND1B	pseudobulk	up
PDGFA	2.00471	3.68829	70.0985	0.000336988	0.00651285	PDGFA	pseudobulk	up
AURKC	1.99973	1.47514	49.2351	0.000789046	0.00922306	AURKC	pseudobulk	up
HSD17B14	1.99861	5.64987	48.5039	0.000816621	0.00942255	HSD17B14	pseudobulk	up
SLC25A24	1.99812	4.10015	66.534	0.000382529	0.00685698	SLC25A24	pseudobulk	up
ITGAX	1.99721	9.14059	130.362	7.27728420639028e-05	0.00305365	ITGAX	pseudobulk	up
CHPF	1.9955	0.846699	27.8363	0.00296624	0.0177322	CHPF	pseudobulk	up
CD300E	1.9946	1.41853	35.1695	0.00173311	0.0135431	CD300E	pseudobulk	up
UNC13B	1.99406	2.21427	60.1262	0.000488913	0.00746236	UNC13B	pseudobulk	up
SLC1A3	1.99187	6.38784	53.706	0.000640732	0.00838886	SLC1A3	pseudobulk	up
TENT5A	1.98163	3.64202	122.689	8.46916034912547e-05	0.003319	TENT5A	pseudobulk	up
SPATA20	1.97741	6.14259	43.9944	0.00102825	0.010515	SPATA20	pseudobulk	up
PTER	1.97515	3.04918	86.5055	0.000201437	0.00494294	PTER	pseudobulk	up
ARMCX1	1.97234	3.35345	57.3863	0.000546695	0.00784321	ARMCX1	pseudobulk	up
CNTNAP1	1.97161	0.789695	29.974	0.00250733	0.0163235	CNTNAP1	pseudobulk	up
ELL2	1.96942	6.12405	146.002	5.4785685356993e-05	0.00274588	ELL2	pseudobulk	up
CPAMD8	1.96902	0.113892	12.0983	0.0167922	0.0476224	CPAMD8	pseudobulk	up
BICD1	1.96895	5.88912	34.3918	0.00182219	0.0139625	BICD1	pseudobulk	up
KLF6	1.96706	6.22162	164.153	4.08053290061898e-05	0.00240921	KLF6	pseudobulk	up
CRACR2A	1.96661	3.05375	48.8154	0.000804402	0.0093145	CRACR2A	pseudobulk	up
TRIP6	1.96452	5.02065	148.228	5.27446373482197e-05	0.00274588	TRIP6	pseudobulk	up
ZNF493	1.96057	3.72637	105.681	0.000122795	0.0039972	ZNF493	pseudobulk	up
TXNIP	1.96044	6.90429	56.5762	0.000565622	0.00793801	TXNIP	pseudobulk	up
FUCA1	1.95926	5.14268	37.2939	0.00151193	0.012757	FUCA1	pseudobulk	up
C1orf162	1.95528	5.13259	154.549	4.74910950497545e-05	0.00260403	C1orf162	pseudobulk	up
CALHM6	1.95492	3.75898	72.0307	0.000315398	0.00627996	CALHM6	pseudobulk	up
PARP11	1.94358	2.81206	57.62	0.000541433	0.00780741	PARP11	pseudobulk	up
SRXN1	1.9351	3.06833	71.178	0.000324733	0.0063836	SRXN1	pseudobulk	up
HTATIP2	1.93447	4.10312	83.8312	0.000217581	0.00509837	HTATIP2	pseudobulk	up
MYD88	1.93246	5.23049	121.244	8.72253079819016e-05	0.00336772	MYD88	pseudobulk	up
PLSCR1	1.92991	5.76719	75.5159	0.000281034	0.00581996	PLSCR1	pseudobulk	up
CASP5	1.92545	1.2084	36.4945	0.00159251	0.0130451	CASP5	pseudobulk	up
ZNF483	1.92443	1.4929	41.7405	0.00116457	0.0112002	ZNF483	pseudobulk	up
DHX58	1.9234	4.83793	55.2809	0.000597923	0.00809463	DHX58	pseudobulk	up
ABCC5	1.9232	6.96827	65.8522	0.000392187	0.00693015	ABCC5	pseudobulk	up
NCEH1	1.91958	3.65163	27.0469	0.00313746	0.0182973	NCEH1	pseudobulk	up
SCART1	1.91565	1.98199	49.0205	0.000796709	0.00925652	SCART1	pseudobulk	up
ZNF69	1.91109	2.39097	40.4419	0.00125274	0.0116294	ZNF69	pseudobulk	up
SPN	1.90677	3.79761	65.3908	0.000398949	0.00696788	SPN	pseudobulk	up
KYNU	1.90458	4.90399	118.541	9.22746728465611e-05	0.0034911	KYNU	pseudobulk	up
CUBN	1.90376	0.339963	14.4605	0.0118902	0.0382519	CUBN	pseudobulk	up
C5AR1	1.90033	3.96692	32.3938	0.00208949	0.0148518	C5AR1	pseudobulk	up
CLBA1	1.89936	0.838478	19.8511	0.00616307	0.0261279	CLBA1	pseudobulk	up
SKOR1	1.89751	0.470597	14.6997	0.0114638	0.0374086	SKOR1	pseudobulk	up
RBM43	1.89649	2.68646	71.1717	0.000324805	0.0063836	RBM43	pseudobulk	up
DDX60	1.8959	3.18331	18.6236	0.00703901	0.0282028	DDX60	pseudobulk	up
DDX58	1.89553	4.69549	33.4631	0.00194014	0.0143568	DDX58	pseudobulk	up
FBXO32	1.89437	0.45438	16.1519	0.00951427	0.0335843	FBXO32	pseudobulk	up
TRMO	1.89137	4.0837	110.309	0.000110387	0.003811	TRMO	pseudobulk	up
TUBA1C	1.8906	2.01501	53.1937	0.000656186	0.00846517	TUBA1C	pseudobulk	up
DIPK1A	1.88873	0.849967	21.4267	0.00524271	0.0239198	DIPK1A	pseudobulk	up
CLEC4A	1.88341	4.71206	102.872	0.000131275	0.00411749	CLEC4A	pseudobulk	up
PML	1.88062	5.24169	69.0881	0.000349082	0.00658446	PML	pseudobulk	up
FHAD1	1.87869	3.74463	32.8741	0.00202054	0.0146165	FHAD1	pseudobulk	up
FTCDNL1	1.87789	2.50918	31.2897	0.00226134	0.0155319	FTCDNL1	pseudobulk	up
CIB1	1.8776	4.40811	100.213	0.000140077	0.00418138	CIB1	pseudobulk	up
TNFAIP8	1.87584	2.63658	75.0509	0.000285374	0.00586477	TNFAIP8	pseudobulk	up
MAP4K1	1.87085	4.19888	81.0195	0.000236583	0.00532312	MAP4K1	pseudobulk	up
FGD5	1.86931	3.17529	13.3098	0.013921	0.0422453	FGD5	pseudobulk	up
BTBD19	1.8689	3.51683	97.8217	0.000148717	0.00428327	BTBD19	pseudobulk	up
NPC2	1.86407	6.93085	40.7074	0.00123342	0.0115137	NPC2	pseudobulk	up
RMDN3	1.86336	4.91201	96.1851	0.000155042	0.00436999	RMDN3	pseudobulk	up
AP1S3	1.86096	1.90194	52.743	0.000669451	0.00853726	AP1S3	pseudobulk	up
MUC20	1.85744	3.56081	45.4825	0.000950809	0.0100735	MUC20	pseudobulk	up
AXL	1.85708	6.7631	51.2209	0.000717411	0.00880815	AXL	pseudobulk	up
PRDX1	1.85554	3.27861	18.3909	0.00722695	0.028614	PRDX1	pseudobulk	up
IL20RB	1.85413	0.801252	28.3517	0.00283078	0.0173487	IL20RB	pseudobulk	up
AKR1B1	1.84096	6.41005	100.447	0.000139266	0.00417638	AKR1B1	pseudobulk	up
PLAAT3	1.83789	3.81435	112.326	0.000105524	0.00373502	PLAAT3	pseudobulk	up
UBXN11	1.83455	5.11602	124.332	8.19172940970544e-05	0.00325921	UBXN11	pseudobulk	up
STAT2	1.83363	6.72221	96.4841	0.000153855	0.0043459	STAT2	pseudobulk	up
S100A11	1.8332	6.0675	146.323	5.44847942002663e-05	0.00274588	S100A11	pseudobulk	up
SFI1	1.82979	4.49862	41.737	0.0011635	0.0112002	SFI1	pseudobulk	up
INCA1	1.8296	0.230805	19.8855	0.00616459	0.0261279	INCA1	pseudobulk	up
MAP3K21	1.82654	2.22145	57.3961	0.00054662	0.00784321	MAP3K21	pseudobulk	up
IRF1	1.82598	4.29878	76.8982	0.000268852	0.00569052	IRF1	pseudobulk	up
KLHL6	1.82558	6.40036	46.3668	0.000908524	0.00988752	KLHL6	pseudobulk	up
ERMN	1.82397	1.67965	38.1467	0.00143558	0.0124239	ERMN	pseudobulk	up
HSPB1	1.82122	5.2613	20.8969	0.00551345	0.0245608	HSPB1	pseudobulk	up
FMO4	1.81806	0.777318	25.7546	0.00351006	0.0192221	FMO4	pseudobulk	up
RNH1	1.81799	5.56364	78.0109	0.000259559	0.00557113	RNH1	pseudobulk	up
PSAP	1.81537	9.04765	22.3281	0.00478045	0.0226032	PSAP	pseudobulk	up
SLC26A11	1.81026	5.56347	48.3588	0.000822442	0.00943963	SLC26A11	pseudobulk	up
TRDMT1	1.80744	1.90563	33.4301	0.00194537	0.0143674	TRDMT1	pseudobulk	up
CRYL1	1.8067	4.23539	48.0985	0.000833051	0.00949068	CRYL1	pseudobulk	up
IFIT5	1.80464	3.33408	86.2119	0.000203116	0.00494413	IFIT5	pseudobulk	up
DDX60L	1.80337	5.55934	26.9798	0.00315473	0.0183541	DDX60L	pseudobulk	up
CARD16	1.80281	0.83878	14.9199	0.0111202	0.0366738	CARD16	pseudobulk	up
LAG3	1.8021	1.6601	40.5132	0.00124824	0.0116022	LAG3	pseudobulk	up
HACD4	1.80128	3.0538	84.1558	0.000215546	0.00509579	HACD4	pseudobulk	up
LANCL2	1.80045	2.48664	49.531	0.000777159	0.00913687	LANCL2	pseudobulk	up
GFAP	1.79785	9.61231	73.6586	0.000298652	0.00606336	GFAP	pseudobulk	up
GLIPR2	1.79677	1.55638	43.4921	0.00105713	0.0106694	GLIPR2	pseudobulk	up
STX2	1.79537	5.21459	40.9445	0.00121682	0.0114406	STX2	pseudobulk	up
S100A6	1.79459	6.37265	56.0732	0.000577868	0.00796118	S100A6	pseudobulk	up
SIGLEC9	1.79452	5.28777	62.4366	0.00044614	0.00719617	SIGLEC9	pseudobulk	up
YBX3	1.79275	5.05992	125.767	7.96050907087088e-05	0.00321624	YBX3	pseudobulk	up
UPP1	1.78821	4.04747	92.5297	0.000170621	0.00455339	UPP1	pseudobulk	up
IFITM2	1.78478	2.29348	59.1437	0.000508585	0.00758713	IFITM2	pseudobulk	up
FABP3	1.78454	4.80857	45.2065	0.000964531	0.0101755	FABP3	pseudobulk	up
SECTM1	1.78431	2.91952	77.094	0.000267229	0.00567047	SECTM1	pseudobulk	up
EVI2B	1.78302	5.13771	66.9335	0.000377003	0.00681436	EVI2B	pseudobulk	up
OSM	1.78104	2.65261	52.1675	0.000686976	0.00863684	OSM	pseudobulk	up
GNS	1.78095	5.03649	40.8842	0.00122102	0.0114553	GNS	pseudobulk	up
DUSP2	1.78063	1.82645	42.3737	0.00112397	0.01107	DUSP2	pseudobulk	up
PFKP	1.78024	1.36263	29.0695	0.00267581	0.0169019	PFKP	pseudobulk	up
LAP3	1.7795	5.45831	27.2695	0.00308053	0.0181248	LAP3	pseudobulk	up
CORO1C	1.77752	5.88695	86.3872	0.000202084	0.00494413	CORO1C	pseudobulk	up
CEACAM19	1.77624	1.14483	31.3157	0.00225983	0.0155319	CEACAM19	pseudobulk	up
AKAP7	1.77498	2.99873	63.2494	0.000432454	0.00714371	AKAP7	pseudobulk	up
FCER1G	1.77101	6.45006	143.462	5.7252288964356e-05	0.00278314	FCER1G	pseudobulk	up
THEMIS2	1.76812	6.35278	136.281	6.5117827359376e-05	0.00291023	THEMIS2	pseudobulk	up
GSTZ1	1.7672	1.4854	20.9902	0.00546362	0.0244934	GSTZ1	pseudobulk	up
SLC20A2	1.76551	2.5845	59.9826	0.000491544	0.00747628	SLC20A2	pseudobulk	up
LRRC6	1.76188	1.49584	24.803	0.0038029	0.0200355	LRRC6	pseudobulk	up
DTX3L	1.76138	4.90475	74.3902	0.000291538	0.00595394	DTX3L	pseudobulk	up
SPATA7	1.76025	3.42869	82.0773	0.000229183	0.00527542	SPATA7	pseudobulk	up
CXCL16	1.75903	6.11501	77.9435	0.000260109	0.00557375	CXCL16	pseudobulk	up
SLC46A3	1.75865	3.1037	80.7923	0.000238241	0.0053237	SLC46A3	pseudobulk	up
SLC49A3	1.75703	4.87155	124.585	8.15051747846554e-05	0.00325347	SLC49A3	pseudobulk	up
SGK1	1.7554	7.56665	124.572	8.15238408531362e-05	0.00325347	SGK1	pseudobulk	up
IQSEC1	1.75471	6.47024	42.4866	0.00111597	0.0110329	IQSEC1	pseudobulk	up
CDKN1A	1.75418	3.6256	87.7492	0.000194467	0.00486167	CDKN1A	pseudobulk	up
TSNARE1	1.75327	5.22338	70.9722	0.000326959	0.00639703	TSNARE1	pseudobulk	up
GPR141	1.75248	3.44278	46.0111	0.000925268	0.00994052	GPR141	pseudobulk	up
LRRC27	1.74968	3.47887	22.9268	0.00451397	0.0219721	LRRC27	pseudobulk	up
TSHZ3	1.74872	2.77169	59.6404	0.00049839	0.00751906	TSHZ3	pseudobulk	up
IQCK	1.74262	3.41587	69.6622	0.000342156	0.00654712	IQCK	pseudobulk	up
PMAIP1	1.74228	1.94679	37.3731	0.00150545	0.0127242	PMAIP1	pseudobulk	up
HTR7	1.73963	2.60321	29.087	0.00266647	0.0168878	HTR7	pseudobulk	up
TMEM51	1.73797	4.90548	65.1211	0.00040295	0.0069848	TMEM51	pseudobulk	up
ZRSR2	1.7374	4.55822	90.623	0.000179611	0.00467849	ZRSR2	pseudobulk	up
GSTO1	1.73689	2.68778	65.0062	0.000404748	0.0069848	GSTO1	pseudobulk	up
HNMT	1.73638	4.96008	62.0675	0.000452575	0.00719617	HNMT	pseudobulk	up
CAPN5	1.73629	0.980915	29.55	0.00257637	0.0165731	CAPN5	pseudobulk	up
GRN	1.73607	6.70126	53.2386	0.000654254	0.00846186	GRN	pseudobulk	up
CXCL8	1.73355	3.46934	66.9911	0.000376369	0.00681436	CXCL8	pseudobulk	up
DMXL2	1.73155	5.23662	60.8648	0.000474453	0.00734474	DMXL2	pseudobulk	up
CDC25B	1.73097	4.84582	99.8581	0.000141312	0.00419119	CDC25B	pseudobulk	up
ARMC9	1.73	2.38385	56.6875	0.000563155	0.007936	ARMC9	pseudobulk	up
TRMT5	1.7293	2.54512	64.0073	0.000420219	0.00704866	TRMT5	pseudobulk	up
MAPK13	1.72823	4.6473	56.8924	0.00055812	0.00791087	MAPK13	pseudobulk	up
CD68	1.72654	7.85834	38.7777	0.00138113	0.0122336	CD68	pseudobulk	up
SPARCL1	1.72508	0.0775733	12.4925	0.0158837	0.0458836	SPARCL1	pseudobulk	up
DZIP1L	1.72501	4.90047	38.9673	0.00136558	0.0121814	DZIP1L	pseudobulk	up
LCP2	1.72353	6.85895	130.831	7.21226358549044e-05	0.00305075	LCP2	pseudobulk	up
GSAP	1.72029	4.8785	97.2465	0.000150893	0.00430278	GSAP	pseudobulk	up
DNAJC15	1.72019	3.42271	13.9372	0.0127147	0.0399437	DNAJC15	pseudobulk	up
CYP2E1	1.72002	0.189253	16.0436	0.0096319	0.0338074	CYP2E1	pseudobulk	up
ARHGAP24	1.71742	4.90438	113.719	0.000102331	0.00363906	ARHGAP24	pseudobulk	up
SERPINB8	1.71676	2.54864	53.2836	0.00065308	0.0084565	SERPINB8	pseudobulk	up
PLP2	1.7162	1.55614	32.5813	0.00206371	0.014765	PLP2	pseudobulk	up
OLR1	1.71616	7.07236	37.1755	0.00152306	0.0127902	OLR1	pseudobulk	up
CTSS	1.71426	6.56255	41.0724	0.00120798	0.0114081	CTSS	pseudobulk	up
MS4A7	1.71361	8.46807	61.7266	0.000458627	0.00724504	MS4A7	pseudobulk	up
TXNRD3	1.71319	2.45372	52.6349	0.000672446	0.00854554	TXNRD3	pseudobulk	up
PRKCH	1.71261	2.81842	69.1591	0.00034826	0.00658446	PRKCH	pseudobulk	up
PDE8A	1.71151	5.41857	96.9616	0.000151988	0.00430723	PDE8A	pseudobulk	up
NENF	1.71126	4.29078	65.1706	0.000402211	0.0069848	NENF	pseudobulk	up
IL15RA	1.71012	1.72477	27.9041	0.00292809	0.0176333	IL15RA	pseudobulk	up
ACER3	1.70785	2.88003	54.0469	0.000631186	0.00832859	ACER3	pseudobulk	up
PRG2	1.70688	0.866991	14.4569	0.0119112	0.0382859	PRG2	pseudobulk	up
HMGN4	1.70595	4.44709	93.9759	0.000164209	0.0044901	HMGN4	pseudobulk	up
CASP4	1.70324	4.31502	93.378	0.000166818	0.00452468	CASP4	pseudobulk	up
RCC1	1.69975	2.89609	29.9978	0.0024874	0.0162384	RCC1	pseudobulk	up
ZCWPW2	1.69901	1.30256	17.3004	0.00821301	0.030852	ZCWPW2	pseudobulk	up
NIBAN2	1.69746	2.04636	20.4317	0.0057868	0.0251885	NIBAN2	pseudobulk	up
RASSF4	1.69431	7.35718	98.5472	0.000146008	0.00424367	RASSF4	pseudobulk	up
AIFM3	1.69374	4.07937	67.9285	0.000363748	0.00668579	AIFM3	pseudobulk	up
CD244	1.69309	0.898205	21.453	0.00523596	0.0239198	CD244	pseudobulk	up
CARHSP1	1.68889	2.4563	45.8498	0.000933132	0.00997816	CARHSP1	pseudobulk	up
NMT2	1.68786	2.92959	61.8223	0.00045697	0.00723341	NMT2	pseudobulk	up
YWHAZ	1.68572	4.8678	67.8295	0.000365033	0.00668658	YWHAZ	pseudobulk	up
ZSCAN5A	1.68547	1.4151	19.9225	0.00610739	0.0259783	ZSCAN5A	pseudobulk	up
PCK2	1.68246	4.13948	87.761	0.000194392	0.00486167	PCK2	pseudobulk	up
LTA4H	1.68093	5.98073	81.411	0.000233794	0.00528838	LTA4H	pseudobulk	up
PPARGC1B	1.67924	4.78891	68.6627	0.000354362	0.00660917	PPARGC1B	pseudobulk	up
HMOX1	1.67862	7.11086	102.473	0.000132541	0.00412109	HMOX1	pseudobulk	up
CYTIP	1.67832	4.33319	94.5828	0.000161618	0.00445902	CYTIP	pseudobulk	up
CCDC32	1.67823	4.1762	93.9969	0.000164118	0.0044901	CCDC32	pseudobulk	up
C5	1.6779	1.67023	30.3983	0.00241535	0.0160246	C5	pseudobulk	up
ATG7	1.67785	6.5249	63.6327	0.000426134	0.00712042	ATG7	pseudobulk	up
FAM234B	1.67539	2.7162	65.0807	0.000403618	0.0069848	FAM234B	pseudobulk	up
SOWAHC	1.67513	1.90048	22.6481	0.0046365	0.0222601	SOWAHC	pseudobulk	up
PRXL2C	1.66967	2.43395	56.3462	0.000571304	0.00796118	PRXL2C	pseudobulk	up
TMEM44	1.66884	2.32183	43.1604	0.00107584	0.0107749	TMEM44	pseudobulk	up
ZSCAN18	1.66371	1.64609	37.1903	0.00152268	0.0127902	ZSCAN18	pseudobulk	up
SLC11A1	1.66255	6.63369	95.8643	0.000156326	0.00438721	SLC11A1	pseudobulk	up
TRERF1	1.66175	3.81189	89.2628	0.000186439	0.00475841	TRERF1	pseudobulk	up
TTLL4	1.66131	4.12307	42.3731	0.00112302	0.011069	TTLL4	pseudobulk	up
ANTXR2	1.65571	2.2133	46.994	0.000880434	0.00980126	ANTXR2	pseudobulk	up
ECHDC3	1.65525	1.82103	43.518	0.00105532	0.0106677	ECHDC3	pseudobulk	up
ANKDD1A	1.65522	3.0262	50.4902	0.000742445	0.00895463	ANKDD1A	pseudobulk	up
LEPR	1.65442	0.719944	21.2898	0.00531043	0.0240629	LEPR	pseudobulk	up
EFR3A	1.65414	5.24883	116.081	9.72214910226772e-05	0.00357449	EFR3A	pseudobulk	up
ETV5	1.65348	6.53484	66.5837	0.000381821	0.00685698	ETV5	pseudobulk	up
TGFBR1	1.65223	6.33481	77.4268	0.000264376	0.00562824	TGFBR1	pseudobulk	up
IGSF8	1.65008	2.90625	62.2288	0.000449799	0.00719617	IGSF8	pseudobulk	up
TES	1.64821	3.39628	51.9433	0.000693914	0.00865734	TES	pseudobulk	up
PLEC	1.6474	6.62725	63.8657	0.000422383	0.00706679	PLEC	pseudobulk	up
ATP10A	1.64498	2.23029	24.2614	0.00399033	0.0205744	ATP10A	pseudobulk	up
HORMAD1	1.64289	2.00712	27.7083	0.00297401	0.017747	HORMAD1	pseudobulk	up
LRRFIP1	1.64242	4.55047	81.7004	0.000231774	0.00528838	LRRFIP1	pseudobulk	up
CCDC24	1.64044	2.92952	68.3535	0.000358308	0.00663411	CCDC24	pseudobulk	up
SHFL	1.63648	5.82193	49.6685	0.000771903	0.00912439	SHFL	pseudobulk	up
CCDC62	1.63459	0.604501	20.4162	0.00580636	0.0252156	CCDC62	pseudobulk	up
GM2A	1.63349	5.73053	15.1613	0.0107472	0.0360395	GM2A	pseudobulk	up
PID1	1.63278	1.72372	25.1857	0.00367567	0.0196911	PID1	pseudobulk	up
OTOF	1.63169	3.86323	11.6492	0.0179935	0.0497911	OTOF	pseudobulk	up
AHI1	1.63102	3.59201	18.2821	0.0073171	0.0288161	AHI1	pseudobulk	up
FCHO1	1.63045	4.3485	54.6907	0.000613498	0.00822542	FCHO1	pseudobulk	up
SLC19A2	1.62738	1.04693	27.6812	0.00298175	0.0177716	SLC19A2	pseudobulk	up
CCDC89	1.62666	0.146066	12.3388	0.0162393	0.046606	CCDC89	pseudobulk	up
RHOC	1.62624	4.98656	53.5338	0.000645676	0.00843905	RHOC	pseudobulk	up
BMF	1.62482	5.79935	24.4524	0.00392112	0.0203816	BMF	pseudobulk	up
NT5DC3	1.62454	0.387003	17.0499	0.00850211	0.0314147	NT5DC3	pseudobulk	up
IDNK	1.62414	2.65318	31.0946	0.0022934	0.0156262	IDNK	pseudobulk	up
FSD1L	1.62404	1.32936	25.5714	0.00355501	0.0193714	FSD1L	pseudobulk	up
KCNAB2	1.62166	5.96508	63.113	0.000434668	0.00716854	KCNAB2	pseudobulk	up
F8	1.6202	0.422593	16.7806	0.00876961	0.0319764	F8	pseudobulk	up
FERMT3	1.61845	5.99131	117.379	9.45644333352612e-05	0.00355639	FERMT3	pseudobulk	up
NEK11	1.61611	1.56313	33.4758	0.00193949	0.0143568	NEK11	pseudobulk	up
TANK	1.61458	4.75226	83.7702	0.000217963	0.00509837	TANK	pseudobulk	up
PDE6B	1.61291	4.36541	91.0858	0.00017737	0.00465763	PDE6B	pseudobulk	up
PHETA2	1.61164	2.01246	41.3565	0.00118909	0.011315	PHETA2	pseudobulk	up
PLXNA1	1.60606	4.53152	97.9958	0.000148054	0.00427458	PLXNA1	pseudobulk	up
CCDC107	1.60477	2.95049	62.5214	0.000444723	0.00719617	CCDC107	pseudobulk	up
HEATR3	1.60158	4.02253	81.4706	0.000233384	0.00528838	HEATR3	pseudobulk	up
TARBP1	1.60073	4.32819	80.5256	0.000240156	0.00533606	TARBP1	pseudobulk	up
AGA	1.59953	3.44472	40.4231	0.00125383	0.0116294	AGA	pseudobulk	up
SERPINA1	1.59812	5.86308	94.6006	0.000161538	0.00445902	SERPINA1	pseudobulk	up
JPT1	1.59732	3.75045	62.1003	0.000452015	0.00719617	JPT1	pseudobulk	up
AFAP1L1	1.597	1.16606	23.2572	0.00438027	0.0216361	AFAP1L1	pseudobulk	up
PTCH2	1.59697	0.734558	24.9375	0.0037594	0.0198866	PTCH2	pseudobulk	up
CRTAP	1.59363	5.51286	86.7021	0.000200283	0.00494294	CRTAP	pseudobulk	up
TRIM25	1.59298	5.18641	51.1186	0.000720837	0.0088411	TRIM25	pseudobulk	up
PPDPF	1.59172	2.76516	35.3253	0.00171365	0.0134442	PPDPF	pseudobulk	up
WWC3	1.59151	3.31803	67.9569	0.000363393	0.00668579	WWC3	pseudobulk	up
ZNF43	1.59143	0.836603	14.2507	0.0121788	0.0388021	ZNF43	pseudobulk	up
ARMCX2	1.58602	3.92044	87.8744	0.000193776	0.00486167	ARMCX2	pseudobulk	up
GALC	1.58589	3.6944	65.2885	0.000400464	0.00697737	GALC	pseudobulk	up
AGAP3	1.5857	4.02523	75.6484	0.000279843	0.00581996	AGAP3	pseudobulk	up
DOK3	1.58473	5.37945	84.726	0.000211968	0.00502941	DOK3	pseudobulk	up
SLC3A2	1.58362	5.32941	80.538	0.000240058	0.00533606	SLC3A2	pseudobulk	up
FXYD2	1.58356	0.148964	13.9306	0.0127925	0.040063	FXYD2	pseudobulk	up
CDKN1C	1.58321	1.45917	21.4617	0.00520975	0.0238552	CDKN1C	pseudobulk	up
CCNE1	1.58256	1.04335	28.7376	0.00274149	0.0171672	CCNE1	pseudobulk	up
ZNF572	1.58238	1.18471	19.8003	0.00618829	0.0261943	ZNF572	pseudobulk	up
ACVR1B	1.58069	3.81159	81.8265	0.000230903	0.00528647	ACVR1B	pseudobulk	up
CCT6B	1.57914	1.17405	26.6436	0.00324724	0.0185536	CCT6B	pseudobulk	up
TNS1	1.57858	3.93817	75.5841	0.000280423	0.00581996	TNS1	pseudobulk	up
F11R	1.57758	4.17174	45.8556	0.000932648	0.00997816	F11R	pseudobulk	up
CCDC154	1.57593	3.91068	60.0206	0.000490717	0.00747242	CCDC154	pseudobulk	up
PLEKHA5	1.57477	2.43024	22.6812	0.00462126	0.0222127	PLEKHA5	pseudobulk	up
UNC5CL	1.57465	0.943188	22.3345	0.00478322	0.0226081	UNC5CL	pseudobulk	up
OSCAR	1.57417	5.08901	66.5468	0.000382336	0.00685698	OSCAR	pseudobulk	up
TOR3A	1.57258	3.36968	38.1372	0.00143566	0.0124239	TOR3A	pseudobulk	up
UPK3B	1.57191	1.94542	39.2905	0.00134006	0.0120772	UPK3B	pseudobulk	up
ABCA3	1.56921	0.946899	20.9402	0.00550059	0.0245608	ABCA3	pseudobulk	up
SORBS3	1.56655	6.16383	39.4684	0.00132557	0.0120191	SORBS3	pseudobulk	up
KLF11	1.56562	2.89397	26.3721	0.00331886	0.0187413	KLF11	pseudobulk	up
PIGW	1.565	0.97978	20.6004	0.005691	0.0250219	PIGW	pseudobulk	up
GALE	1.56145	3.83555	55.2577	0.000598538	0.00809463	GALE	pseudobulk	up
P2RY11	1.56087	4.56207	93.5895	0.000165888	0.00451007	P2RY11	pseudobulk	up
CLN8	1.56065	5.13913	57.7074	0.000539365	0.00780706	CLN8	pseudobulk	up
AC118549.1	1.55935	4.75884	67.3372	0.000371545	0.00675301	AC118549.1	pseudobulk	up
KLHL42	1.55638	3.25135	64.4797	0.00041275	0.00703826	KLHL42	pseudobulk	up
ENTPD5	1.55443	2.67194	55.5267	0.000591685	0.00808082	ENTPD5	pseudobulk	up
PTPRO	1.55359	4.29383	83.2482	0.000221338	0.00514877	PTPRO	pseudobulk	up
ALOX5	1.55295	6.58482	105.981	0.000121922	0.0039972	ALOX5	pseudobulk	up
DHRS7	1.55284	3.73499	49.9529	0.000761539	0.00905933	DHRS7	pseudobulk	up
USP43	1.55206	0.92062	22.4447	0.00473304	0.0224749	USP43	pseudobulk	up
ANKRD24	1.55156	2.13318	32.3162	0.00210134	0.0148856	ANKRD24	pseudobulk	up
FKBP5	1.55067	2.84958	54.3275	0.00062341	0.00828364	FKBP5	pseudobulk	up
C3AR1	1.54758	4.83654	43.2173	0.00107223	0.010747	C3AR1	pseudobulk	up
FCMR	1.54729	1.31876	18.1017	0.0074946	0.0292216	FCMR	pseudobulk	up
BST2	1.54681	6.73635	101.498	0.000135721	0.00413626	BST2	pseudobulk	up
ZYX	1.54606	6.01211	15.8718	0.00979546	0.0340156	ZYX	pseudobulk	up
DNASE2	1.54545	5.69329	26.6047	0.0032545	0.0185714	DNASE2	pseudobulk	up
ICA1L	1.54389	0.933972	23.2084	0.00439963	0.0216907	ICA1L	pseudobulk	up
STK32C	1.54381	3.53304	59.225	0.000506753	0.00758195	STK32C	pseudobulk	up
RAB20	1.54374	4.91048	40.2115	0.00126922	0.0117304	RAB20	pseudobulk	up
MYL12A	1.54307	0.822613	14.7545	0.0113598	0.0372195	MYL12A	pseudobulk	up
EMILIN1	1.54273	1.01356	17.1686	0.00835448	0.0311114	EMILIN1	pseudobulk	up
MS4A6A	1.54162	8.1518	97.6529	0.00014934	0.00428327	MS4A6A	pseudobulk	up
HEXA	1.54115	7.20147	110.772	0.000109238	0.00379195	HEXA	pseudobulk	up
LGMN	1.54067	7.37273	89.5392	0.000185014	0.00473419	LGMN	pseudobulk	up
SERINC5	1.54066	4.05965	57.1601	0.000551872	0.00786237	SERINC5	pseudobulk	up
SOAT1	1.54	4.20908	70.1523	0.000336348	0.00651238	SOAT1	pseudobulk	up
SLC46A1	1.53902	3.81617	47.4388	0.000860757	0.00969764	SLC46A1	pseudobulk	up
ZC3H12C	1.53772	4.49532	28.7046	0.00274663	0.0171774	ZC3H12C	pseudobulk	up
LRRC20	1.53683	0.787668	17.9771	0.00759149	0.0293799	LRRC20	pseudobulk	up
KCNMB1	1.53519	4.76712	85.8925	0.000204964	0.00494413	KCNMB1	pseudobulk	up
TALDO1	1.53403	5.36639	30.6049	0.0023771	0.0158676	TALDO1	pseudobulk	up
VPS9D1	1.53391	5.31152	37.5461	0.0014885	0.012661	VPS9D1	pseudobulk	up
P4HA2	1.53327	1.08382	16.9576	0.00856193	0.0315598	P4HA2	pseudobulk	up
TMSB10	1.53197	7.96956	60.4293	0.000482738	0.00741959	TMSB10	pseudobulk	up
TRPV2	1.53151	4.59138	70.3225	0.000334369	0.0064862	TRPV2	pseudobulk	up
CLIC1	1.52976	3.617	55.5133	0.000591975	0.00808082	CLIC1	pseudobulk	up
PMFBP1	1.52648	2.50261	39.2494	0.00134307	0.0120877	PMFBP1	pseudobulk	up
CLYBL	1.52519	2.89597	26.3456	0.00332627	0.0187552	CLYBL	pseudobulk	up
ZC2HC1A	1.52453	3.55495	34.8715	0.00176521	0.0137119	ZC2HC1A	pseudobulk	up
SPG21	1.52355	5.83657	93.0733	0.000168164	0.00452967	SPG21	pseudobulk	up
C9orf43	1.52322	0.726571	19.2409	0.00657944	0.0270431	C9orf43	pseudobulk	up
CPNE2	1.52306	2.94522	19.6996	0.0062525	0.0263744	CPNE2	pseudobulk	up
PARP10	1.52188	4.65422	53.9707	0.000633252	0.00834033	PARP10	pseudobulk	up
PYROXD2	1.52047	2.25407	37.9297	0.00145418	0.0125096	PYROXD2	pseudobulk	up
RFX5	1.51993	5.85723	103.273	0.000130011	0.0041093	RFX5	pseudobulk	up
MUSTN1	1.51967	3.60295	62.3335	0.00044794	0.00719617	MUSTN1	pseudobulk	up
ZNF331	1.51893	3.59258	73.1819	0.00030344	0.00612491	ZNF331	pseudobulk	up
ARID5B	1.51607	4.8739	66.5853	0.000381804	0.00685698	ARID5B	pseudobulk	up
PYCR3	1.51237	1.34772	25.6124	0.00354332	0.0193461	PYCR3	pseudobulk	up
IDS	1.51103	5.38988	98.6245	0.000145726	0.00424367	IDS	pseudobulk	up
SLC12A8	1.50872	0.482173	15.9921	0.0097312	0.0339656	SLC12A8	pseudobulk	up
ATP6AP1	1.50849	5.62813	60.1878	0.000487418	0.00745699	ATP6AP1	pseudobulk	up
TIPARP	1.50545	2.6727	53.2778	0.000653192	0.0084565	TIPARP	pseudobulk	up
EML2	1.50381	3.74224	51.6119	0.00070456	0.00875496	EML2	pseudobulk	up
ZSCAN20	1.50159	1.23885	13.7869	0.0129947	0.0404823	ZSCAN20	pseudobulk	up
CFAP70	1.5014	1.07389	18.5284	0.00712487	0.0284167	CFAP70	pseudobulk	up
MTCL1	1.50083	1.49112	17.2989	0.00821301	0.030852	MTCL1	pseudobulk	up
CD58	1.49941	3.84731	53.9335	0.000634313	0.00834454	CD58	pseudobulk	up
ALG14	1.49907	1.30433	19.5504	0.00635684	0.026595	ALG14	pseudobulk	up
SLC39A8	1.49886	1.10803	18.8559	0.00686505	0.0277423	SLC39A8	pseudobulk	up
GLMP	1.49536	4.4294	49.1828	0.000790144	0.00922306	GLMP	pseudobulk	up
ARSD	1.4946	2.70846	33.4891	0.00193689	0.0143568	ARSD	pseudobulk	up
C11orf80	1.49349	1.95889	32.0315	0.00214436	0.0150517	C11orf80	pseudobulk	up
PRKAR1B	1.49269	1.29658	21.4833	0.00519783	0.0238321	PRKAR1B	pseudobulk	up
SLC2A6	1.49039	0.769502	18.0343	0.00754125	0.0292723	SLC2A6	pseudobulk	up
GRAMD4	1.49006	5.24802	81.9359	0.000230137	0.00528467	GRAMD4	pseudobulk	up
NBEAL2	1.48875	5.55447	26.7495	0.00321548	0.018467	NBEAL2	pseudobulk	up
ANKRD36	1.48781	2.33751	37.4431	0.00149834	0.0126943	ANKRD36	pseudobulk	up
LIMD1	1.4876	5.60539	72.098	0.000314662	0.00627996	LIMD1	pseudobulk	up
MYBPC3	1.48506	2.08186	39.23	0.00134473	0.0120942	MYBPC3	pseudobulk	up
ANXA5	1.48482	6.51489	44.7364	0.000988562	0.0102959	ANXA5	pseudobulk	up
SCPEP1	1.48326	5.6171	92.8046	0.000169369	0.00452967	SCPEP1	pseudobulk	up
C12orf49	1.48286	1.42193	21.4096	0.00523733	0.0239198	C12orf49	pseudobulk	up
TMEM251	1.48125	4.03053	35.7534	0.00166662	0.0132699	TMEM251	pseudobulk	up
CKLF	1.47991	6.71237	101.593	0.000135405	0.00413626	CKLF	pseudobulk	up
AKT1S1	1.47981	4.71931	83.5443	0.000219411	0.00511307	AKT1S1	pseudobulk	up
ZNF229	1.47899	1.07083	16.5528	0.00899757	0.032445	ZNF229	pseudobulk	up
TMEM220	1.47836	2.89472	52.7816	0.000667931	0.00852887	TMEM220	pseudobulk	up
CCDC180	1.47729	2.6472	45.7402	0.000938315	0.0100041	CCDC180	pseudobulk	up
SIGIRR	1.47682	2.76564	53.0249	0.000660652	0.00847739	SIGIRR	pseudobulk	up
BAG1	1.47557	6.09544	53.7853	0.000638476	0.0083824	BAG1	pseudobulk	up
KLKB1	1.47538	1.84846	21.9163	0.00497884	0.0231989	KLKB1	pseudobulk	up
ACSF2	1.47447	4.78457	76.6366	0.000271097	0.00572463	ACSF2	pseudobulk	up
SPTBN5	1.4735	1.61469	17.9671	0.00758938	0.0293799	SPTBN5	pseudobulk	up
ZNF558	1.47089	2.44479	38.6692	0.00139038	0.0122714	ZNF558	pseudobulk	up
EID3	1.47075	3.17452	58.2594	0.000527203	0.00771249	EID3	pseudobulk	up
ARMT1	1.46813	2.01793	36.8779	0.00155205	0.0128517	ARMT1	pseudobulk	up
TMEM159	1.4679	2.05608	37.2668	0.00151488	0.012757	TMEM159	pseudobulk	up
ERBB2	1.46249	0.843328	17.7899	0.00775226	0.0297956	ERBB2	pseudobulk	up
AIFM2	1.4612	2.62202	41.5129	0.00117838	0.0112741	AIFM2	pseudobulk	up
OAS1	1.45686	6.26844	13.6309	0.0132841	0.0410021	OAS1	pseudobulk	up
FAM71F2	1.45626	1.69972	28.2923	0.00283815	0.0173487	FAM71F2	pseudobulk	up
PTK2B	1.45555	5.51	93.1085	0.000168007	0.00452967	PTK2B	pseudobulk	up
LY75	1.45342	2.41989	21.8561	0.00500698	0.0232715	LY75	pseudobulk	up
PLEKHO2	1.45339	6.81171	46.9643	0.00088144	0.00980126	PLEKHO2	pseudobulk	up
HEBP1	1.45329	3.22316	35.6279	0.00168025	0.0133252	HEBP1	pseudobulk	up
SEPTIN1	1.45274	0.33466	12.1167	0.016737	0.0475234	SEPTIN1	pseudobulk	up
MAFB	1.45094	8.45568	62.1212	0.000451625	0.00719617	MAFB	pseudobulk	up
COMT	1.44954	4.93375	83.0842	0.000222412	0.00516455	COMT	pseudobulk	up
XRRA1	1.44865	2.63587	13.3942	0.0137504	0.041877	XRRA1	pseudobulk	up
CLEC7A	1.44774	7.46182	104.733	0.000125562	0.00403527	CLEC7A	pseudobulk	up
NCF2	1.44664	6.3998	24.7287	0.00382551	0.0200978	NCF2	pseudobulk	up
NCOA7	1.44525	4.40584	74.8789	0.000286917	0.00588721	NCOA7	pseudobulk	up
PHYH	1.44393	2.15909	34.6426	0.0017925	0.0138333	PHYH	pseudobulk	up
CAPN3	1.44385	5.09431	85.9424	0.000204667	0.00494413	CAPN3	pseudobulk	up
MYO1G	1.44324	4.44729	13.4505	0.0136365	0.0416175	MYO1G	pseudobulk	up
SCARB2	1.4424	3.86489	52.0946	0.000689092	0.00865361	SCARB2	pseudobulk	up
PLK3	1.43775	5.64534	92.255	0.00017187	0.00456804	PLK3	pseudobulk	up
DSC2	1.43597	2.61215	18.2716	0.00732643	0.0288272	DSC2	pseudobulk	up
CTSF	1.43142	3.52594	64.3109	0.000415363	0.00703826	CTSF	pseudobulk	up
PTRHD1	1.42945	2.05198	27.9359	0.00291968	0.0176153	PTRHD1	pseudobulk	up
ZNF589	1.4273	4.53128	49.0887	0.000793739	0.00924848	ZNF589	pseudobulk	up
TPCN2	1.42717	2.18381	31.8891	0.00216579	0.0150947	TPCN2	pseudobulk	up
ADAM8	1.42668	3.17622	49.5853	0.0007751	0.00913687	ADAM8	pseudobulk	up
AP2S1	1.42584	2.6227	27.7101	0.00297254	0.017747	AP2S1	pseudobulk	up
TOM1L2	1.42153	4.66874	78.3562	0.00025677	0.00554324	TOM1L2	pseudobulk	up
HK1	1.42119	5.21462	85.5874	0.000206761	0.0049639	HK1	pseudobulk	up
CREB5	1.42068	4.41739	33.7506	0.00190253	0.0142462	CREB5	pseudobulk	up
ZNF267	1.42011	4.56048	59.202	0.000507207	0.00758195	ZNF267	pseudobulk	up
ADARB1	1.4201	3.16976	24.0192	0.00407803	0.0208303	ADARB1	pseudobulk	up
ARHGAP15	1.41972	6.88267	90.9262	0.000178134	0.00465763	ARHGAP15	pseudobulk	up
ERGIC1	1.41921	3.42126	44.9093	0.000979672	0.0102524	ERGIC1	pseudobulk	up
ATIC	1.41678	4.19673	39.7658	0.00130263	0.011871	ATIC	pseudobulk	up
HEG1	1.41667	2.59828	27.5829	0.00300343	0.0178239	HEG1	pseudobulk	up
CTSB	1.41553	8.36089	97.3986	0.000150306	0.00430153	CTSB	pseudobulk	up
ICAM1	1.41448	4.60188	55.9851	0.000580065	0.00796118	ICAM1	pseudobulk	up
IL18	1.41287	5.7521	74.7277	0.00028833	0.00589886	IL18	pseudobulk	up
MBNL3	1.41171	3.13294	55.1496	0.000601384	0.00811588	MBNL3	pseudobulk	up
FAM200B	1.40792	2.74964	45.0243	0.000973837	0.0102323	FAM200B	pseudobulk	up
HVCN1	1.40786	4.87141	61.1277	0.00046955	0.00732095	HVCN1	pseudobulk	up
RSPH3	1.40692	3.68997	60.702	0.000477549	0.00738227	RSPH3	pseudobulk	up
RABL3	1.406	2.54732	39.4384	0.00132809	0.0120191	RABL3	pseudobulk	up
SLC29A2	1.40492	1.10086	17.1968	0.00832041	0.0310918	SLC29A2	pseudobulk	up
AMFR	1.40462	4.24103	56.9417	0.000556962	0.00791087	AMFR	pseudobulk	up
IL1A	1.4042	2.9577	31.1513	0.00228387	0.0156068	IL1A	pseudobulk	up
TBC1D32	1.40248	1.0933	13.8662	0.0128481	0.0401791	TBC1D32	pseudobulk	up
METTL1	1.40227	2.46356	42.6335	0.00110712	0.0109786	METTL1	pseudobulk	up
AHCY	1.40135	2.7821	45.2928	0.000960292	0.0101472	AHCY	pseudobulk	up
FNIP2	1.40123	4.31565	72.0765	0.000314898	0.00627996	FNIP2	pseudobulk	up
C1QB	1.39746	7.1338	43.6315	0.00104846	0.0106312	C1QB	pseudobulk	up
ZKSCAN3	1.39686	2.49287	40.6445	0.00123807	0.0115488	ZKSCAN3	pseudobulk	up
ABCA1	1.393	7.5455	23.5714	0.00424913	0.0212701	ABCA1	pseudobulk	up
SH3PXD2A	1.39231	5.20837	19.5203	0.00637438	0.0266158	SH3PXD2A	pseudobulk	up
TCTN2	1.39175	1.08071	11.6358	0.0180408	0.0498584	TCTN2	pseudobulk	up
MFGE8	1.39138	2.00357	28.0838	0.00288517	0.0174717	MFGE8	pseudobulk	up
APOC2	1.39113	6.36773	83.8679	0.000217337	0.00509837	APOC2	pseudobulk	up
SLC15A3	1.38853	7.08184	38.9062	0.00137055	0.0122064	SLC15A3	pseudobulk	up
EEF1AKMT3	1.3869	2.88287	16.8898	0.00862515	0.0317067	EEF1AKMT3	pseudobulk	up
CYB5R1	1.3854	4.10027	53.7008	0.000640896	0.00838886	CYB5R1	pseudobulk	up
UACA	1.3835	3.44382	56.0124	0.000579404	0.00796118	UACA	pseudobulk	up
ALPK1	1.38222	4.78682	77.7478	0.000261717	0.00559902	ALPK1	pseudobulk	up
FLACC1	1.38161	0.965545	15.5196	0.0102595	0.0350306	FLACC1	pseudobulk	up
S1PR2	1.38128	1.97712	33.8892	0.00188516	0.0142221	S1PR2	pseudobulk	up
TPP1	1.37922	7.21124	28.3699	0.0028198	0.0173218	TPP1	pseudobulk	up
RAB27A	1.37582	2.57093	40.9189	0.00121876	0.0114506	RAB27A	pseudobulk	up
SLC18B1	1.37454	3.60207	25.7595	0.00349609	0.0192119	SLC18B1	pseudobulk	up
SEC22C	1.37267	3.02111	47.2952	0.000866997	0.00973966	SEC22C	pseudobulk	up
STS	1.3706	0.846361	15.5738	0.0101878	0.0348862	STS	pseudobulk	up
ALDH1L2	1.37009	4.40057	72.003	0.000315682	0.00627996	ALDH1L2	pseudobulk	up
NFKBIZ	1.36691	4.65793	65.9191	0.000391232	0.00693015	NFKBIZ	pseudobulk	up
WIPF1	1.36665	6.72783	78.329	0.000256986	0.00554324	WIPF1	pseudobulk	up
NME1	1.36662	2.62029	26.2547	0.00335194	0.0187762	NME1	pseudobulk	up
C3orf62	1.36401	3.87338	64.0771	0.000419031	0.00704866	C3orf62	pseudobulk	up
C1QTNF6	1.36364	2.77299	32.4866	0.00207599	0.0147961	C1QTNF6	pseudobulk	up
ALAS1	1.36081	4.32135	43.3846	0.00106255	0.0106891	ALAS1	pseudobulk	up
SOX4	1.35966	1.80546	17.3898	0.00812186	0.0306548	SOX4	pseudobulk	up
APOL2	1.35885	4.57759	70.3112	0.000334499	0.0064862	APOL2	pseudobulk	up
ZNF600	1.35823	1.779	27.6718	0.00298236	0.0177716	ZNF600	pseudobulk	up
CPNE8	1.35514	3.86126	54.4419	0.000620235	0.00828364	CPNE8	pseudobulk	up
LPIN1	1.35493	3.36983	28.445	0.00280326	0.0172885	LPIN1	pseudobulk	up
TP53I3	1.35225	3.35147	37.4394	0.0014984	0.0126943	TP53I3	pseudobulk	up
C7orf50	1.3522	5.15224	64.6756	0.000409696	0.00702417	C7orf50	pseudobulk	up
SIRPD	1.35182	1.14856	11.7841	0.0176216	0.0491371	SIRPD	pseudobulk	up
FAXDC2	1.35114	1.91721	26.4074	0.00330959	0.0187051	FAXDC2	pseudobulk	up
SLC35F6	1.3506	5.14082	59.3488	0.000504182	0.00756567	SLC35F6	pseudobulk	up
TTC4	1.3506	2.91871	41.3706	0.00118781	0.011315	TTC4	pseudobulk	up
TIMM10	1.34796	3.5227	40.1438	0.00127425	0.0117519	TIMM10	pseudobulk	up
DGLUCY	1.34752	5.16295	78.0666	0.000259106	0.00557056	DGLUCY	pseudobulk	up
DOCK5	1.34751	6.34217	78.5953	0.000254859	0.00552446	DOCK5	pseudobulk	up
TRIM4	1.34624	4.82049	31.989	0.00215011	0.0150634	TRIM4	pseudobulk	up
TTC7A	1.34594	5.17531	65.8345	0.000392443	0.00693015	TTC7A	pseudobulk	up
PBDC1	1.34528	3.14314	20.1223	0.00597673	0.0256107	PBDC1	pseudobulk	up
IAH1	1.34512	3.90644	62.4833	0.000445343	0.00719617	IAH1	pseudobulk	up
SLFN12	1.34482	2.62176	27.8729	0.00293394	0.0176361	SLFN12	pseudobulk	up
OSBPL3	1.34417	4.59923	42.3121	0.0011268	0.011071	OSBPL3	pseudobulk	up
TRIM21	1.34379	4.42438	70.5263	0.000332022	0.00647666	TRIM21	pseudobulk	up
VENTX	1.34358	5.19677	32.8234	0.00202757	0.0146268	VENTX	pseudobulk	up
SETDB2	1.34142	5.19666	58.3676	0.000524817	0.00771249	SETDB2	pseudobulk	up
NME2	1.34123	3.92248	36.9467	0.00154501	0.0128517	NME2	pseudobulk	up
FOXN2	1.33853	3.78237	61.9971	0.000453827	0.00719617	FOXN2	pseudobulk	up
CYTL1	1.33837	1.9658	26.3151	0.00333533	0.0187612	CYTL1	pseudobulk	up
DCBLD2	1.33771	1.98691	30.2243	0.00244586	0.0161324	DCBLD2	pseudobulk	up
FAM186B	1.33615	0.63946	12.0588	0.0168831	0.0477824	FAM186B	pseudobulk	up
PTCRA	1.33267	2.22274	18.8455	0.00686648	0.0277423	PTCRA	pseudobulk	up
FANCF	1.3326	2.76403	22.8439	0.00454969	0.0220555	FANCF	pseudobulk	up
CLDN23	1.33257	2.56781	24.7305	0.00382532	0.0200978	CLDN23	pseudobulk	up
PLXND1	1.33237	7.49662	46.6973	0.000893404	0.00984706	PLXND1	pseudobulk	up
ARHGAP25	1.3303	5.24855	57.3742	0.000546921	0.00784321	ARHGAP25	pseudobulk	up
SCML1	1.3296	3.80416	59.6063	0.000498969	0.0075191	SCML1	pseudobulk	up
ATP6V1F	1.32409	4.59506	67.7354	0.000366266	0.00668658	ATP6V1F	pseudobulk	up
DYNLT1	1.32408	4.36101	56.7986	0.000560333	0.00791379	DYNLT1	pseudobulk	up
TMEM18	1.32405	3.86285	15.2405	0.0106351	0.0357978	TMEM18	pseudobulk	up
TRAF5	1.32254	3.21998	47.1119	0.000874983	0.00978299	TRAF5	pseudobulk	up
SLC66A3	1.32165	3.37497	50.7479	0.000733477	0.0089031	SLC66A3	pseudobulk	up
MEAK7	1.32115	2.88288	44.2711	0.00101327	0.0104614	MEAK7	pseudobulk	up
SIPA1L1	1.32106	2.79385	40.5867	0.00124215	0.0115621	SIPA1L1	pseudobulk	up
CHCHD10	1.32039	3.62963	48.7578	0.000806605	0.00933173	CHCHD10	pseudobulk	up
SEMA4F	1.31795	1.13067	11.7721	0.0176449	0.0491917	SEMA4F	pseudobulk	up
SRSF8	1.31619	3.67589	57.3853	0.000546687	0.00784321	SRSF8	pseudobulk	up
UNC93B1	1.3153	6.00808	53.4125	0.000649178	0.00843905	UNC93B1	pseudobulk	up
CCPG1	1.3143	4.98847	55.3779	0.000595413	0.00809463	CCPG1	pseudobulk	up
WNT2B	1.31206	3.04117	43.3745	0.00106318	0.0106891	WNT2B	pseudobulk	up
B3GNT2	1.31141	5.23547	44.0849	0.00102329	0.0104901	B3GNT2	pseudobulk	up
GAS8	1.31046	1.6087	13.6392	0.0132717	0.0409737	GAS8	pseudobulk	up
PI4K2B	1.30991	2.96101	38.804	0.00137905	0.0122336	PI4K2B	pseudobulk	up
AGTRAP	1.30973	3.9687	61.4257	0.000464079	0.00728789	AGTRAP	pseudobulk	up
ERN1	1.30903	4.43489	45.1014	0.000969837	0.0102068	ERN1	pseudobulk	up
TTC23	1.309	3.62064	57.1677	0.000551696	0.00786237	TTC23	pseudobulk	up
METTL27	1.30867	3.15835	30.9378	0.00231969	0.0156985	METTL27	pseudobulk	up
SLC9A1	1.30743	2.77002	30.9346	0.00232027	0.0156985	SLC9A1	pseudobulk	up
RRM2B	1.30639	2.07884	22.4857	0.00470889	0.0224274	RRM2B	pseudobulk	up
PER3	1.30555	4.89439	70.6083	0.000331077	0.0064679	PER3	pseudobulk	up
MTHFD2	1.3055	4.34954	48.9913	0.000797497	0.00925652	MTHFD2	pseudobulk	up
SLC4A8	1.30528	3.83675	58.9562	0.000512314	0.00758877	SLC4A8	pseudobulk	up
IGSF6	1.30513	4.86325	53.1414	0.000657122	0.00846517	IGSF6	pseudobulk	up
NT5C3A	1.30256	3.10211	19.9992	0.00605514	0.025805	NT5C3A	pseudobulk	up
MICAL1	1.30238	7.52018	52.8569	0.000665595	0.00850853	MICAL1	pseudobulk	up
PILRA	1.30229	4.40113	39.3831	0.00133229	0.0120404	PILRA	pseudobulk	up
HINT1	1.29826	2.847	21.3356	0.00527338	0.0239783	HINT1	pseudobulk	up
TRADD	1.29619	4.0478	58.3535	0.000525134	0.00771249	TRADD	pseudobulk	up
TUBB2A	1.29603	1.26182	15.4471	0.0103529	0.0352296	TUBB2A	pseudobulk	up
KCTD10	1.29507	3.11126	26.5602	0.00326678	0.0185816	KCTD10	pseudobulk	up
IFT22	1.29497	0.960158	16.5539	0.00899404	0.032445	IFT22	pseudobulk	up
HEXB	1.29397	5.75455	23.7114	0.00419452	0.021102	HEXB	pseudobulk	up
TXNRD2	1.28875	4.35831	57.7185	0.000539126	0.00780706	TXNRD2	pseudobulk	up
SCIMP	1.28644	4.59744	16.9817	0.0085289	0.0314679	SCIMP	pseudobulk	up
COMMD9	1.28491	4.07018	30.2192	0.00244629	0.0161324	COMMD9	pseudobulk	up
TRAPPC6A	1.28242	3.06399	32.6102	0.00205806	0.0147327	TRAPPC6A	pseudobulk	up
MGST3	1.28214	4.6591	42.2443	0.00113104	0.0110894	MGST3	pseudobulk	up
LACTB	1.27944	3.1804	44.1332	0.00102072	0.0104802	LACTB	pseudobulk	up
CCDC191	1.27802	2.50942	29.6952	0.00254503	0.0164501	CCDC191	pseudobulk	up
ZMIZ1	1.27749	4.01583	22.7405	0.00459455	0.0221878	ZMIZ1	pseudobulk	up
ITGA11	1.27678	0.634477	13.6128	0.0133283	0.0410597	ITGA11	pseudobulk	up
STOM	1.27572	5.06575	49.7177	0.000770091	0.00911963	STOM	pseudobulk	up
PELI3	1.27554	2.84425	24.4472	0.00392325	0.0203816	PELI3	pseudobulk	up
GADD45B	1.2741	1.90359	17.9467	0.0076073	0.0293975	GADD45B	pseudobulk	up
MVP	1.2734	2.99679	32.7184	0.00204258	0.0146494	MVP	pseudobulk	up
TTC12	1.27155	3.58168	25.824	0.00347677	0.019154	TTC12	pseudobulk	up
SNAPC2	1.27036	2.37818	26.6249	0.00324942	0.018558	SNAPC2	pseudobulk	up
CCNYL1	1.27002	4.91518	62.415	0.000446508	0.00719617	CCNYL1	pseudobulk	up
LTB4R	1.26993	4.82152	49.8373	0.000765709	0.00909235	LTB4R	pseudobulk	up
EOGT	1.26967	3.90923	48.3928	0.000821095	0.00943963	EOGT	pseudobulk	up
MTHFD1	1.26914	3.98177	50.8256	0.000730786	0.00889937	MTHFD1	pseudobulk	up
ANGPTL6	1.26816	0.787686	15.4008	0.0104188	0.035334	ANGPTL6	pseudobulk	up
ZC4H2	1.26815	0.727527	13.5282	0.0134953	0.0413704	ZC4H2	pseudobulk	up
YARS	1.26734	3.64102	52.6078	0.000673166	0.00854554	YARS	pseudobulk	up
B3GNTL1	1.26699	3.95272	53.7461	0.000639606	0.00838881	B3GNTL1	pseudobulk	up
ADGRE1	1.26603	2.28125	28.1469	0.00287053	0.0174389	ADGRE1	pseudobulk	up
UAP1	1.26559	3.01242	43.7612	0.00104125	0.0105745	UAP1	pseudobulk	up
MFSD13A	1.26527	3.9472	57.0973	0.000553329	0.00787453	MFSD13A	pseudobulk	up
ACTG1	1.2651	5.24133	20.0166	0.00604379	0.0257919	ACTG1	pseudobulk	up
TNFRSF10A	1.26483	2.40973	34.5871	0.00179888	0.0138498	TNFRSF10A	pseudobulk	up
ZNF671	1.26314	3.69723	34.4272	0.00181794	0.0139471	ZNF671	pseudobulk	up
PEBP1	1.26302	4.4724	23.938	0.00410822	0.0209298	PEBP1	pseudobulk	up
DNAH14	1.26261	2.08961	30.5746	0.00238279	0.0158903	DNAH14	pseudobulk	up
ALDH3A2	1.26244	4.39637	61.6413	0.00046017	0.00724504	ALDH3A2	pseudobulk	up
C1orf198	1.26161	1.97928	16.9632	0.00854931	0.0315254	C1orf198	pseudobulk	up
FNDC3B	1.26136	5.52961	63.3623	0.000430544	0.00713442	FNDC3B	pseudobulk	up
TRIM22	1.26107	7.20665	18.236	0.00735566	0.0288878	TRIM22	pseudobulk	up
SPEF2	1.25882	1.80723	18.3311	0.0072771	0.0287254	SPEF2	pseudobulk	up
AGPAT2	1.25551	3.83555	54.9756	0.000605919	0.0081518	AGPAT2	pseudobulk	up
ACCS	1.2554	4.77051	33.7402	0.00190386	0.0142462	ACCS	pseudobulk	up
MCL1	1.25463	7.31248	32.7684	0.00203534	0.0146345	MCL1	pseudobulk	up
ASGR1	1.25311	1.09664	14.5273	0.0117137	0.0379384	ASGR1	pseudobulk	up
MOSPD1	1.25269	2.82046	35.8587	0.00165546	0.0132538	MOSPD1	pseudobulk	up
CELF6	1.25018	5.74184	56.475	0.000568057	0.00794549	CELF6	pseudobulk	up
IL2RG	1.24974	3.27427	34.6489	0.00179139	0.0138329	IL2RG	pseudobulk	up
ZNF350	1.24931	3.33942	46.4707	0.000903777	0.00987796	ZNF350	pseudobulk	up
ICAM2	1.24466	1.90688	25.0779	0.00371005	0.0197599	ICAM2	pseudobulk	up
OSBPL1A	1.24266	3.55727	50.24	0.000751226	0.0089964	OSBPL1A	pseudobulk	up
DHRSX	1.24215	4.31267	54.213	0.00062651	0.00828364	DHRSX	pseudobulk	up
CEP70	1.24211	1.53293	14.9597	0.0110431	0.0365769	CEP70	pseudobulk	up
CNEP1R1	1.24172	2.80655	38.2591	0.0014251	0.0123654	CNEP1R1	pseudobulk	up
MAP4	1.24102	5.32245	54.2528	0.000625399	0.00828364	MAP4	pseudobulk	up
ADA2	1.2402	6.24757	63.4445	0.000429197	0.00713442	ADA2	pseudobulk	up
PTGR1	1.23935	3.49648	49.5884	0.000774897	0.00913687	PTGR1	pseudobulk	up
MGAT1	1.23919	6.4237	35.1752	0.00173031	0.0135294	MGAT1	pseudobulk	up
POMP	1.23849	2.52061	33.6488	0.00191591	0.0142835	POMP	pseudobulk	up
RNF13	1.23756	4.28493	50.3281	0.000748087	0.00898257	RNF13	pseudobulk	up
TSPAN15	1.23651	4.38254	20.4168	0.00579432	0.0251885	TSPAN15	pseudobulk	up
ZNF396	1.23559	1.22589	11.6884	0.0178836	0.0495924	ZNF396	pseudobulk	up
TPRA1	1.2351	4.78616	51.7725	0.000699342	0.00870841	TPRA1	pseudobulk	up
ANKEF1	1.23467	0.91409	14.735	0.0113874	0.0372537	ANKEF1	pseudobulk	up
NOTCH2	1.23415	3.82551	32.7151	0.00204296	0.0146494	NOTCH2	pseudobulk	up
PEPD	1.23303	4.32445	18.1391	0.00743808	0.0290929	PEPD	pseudobulk	up
LILRB4	1.2328	3.98017	25.0568	0.00371615	0.019761	LILRB4	pseudobulk	up
SPART	1.23019	4.06498	47.0386	0.000878173	0.00979501	SPART	pseudobulk	up
LAPTM4A	1.22987	4.21656	24.9674	0.00374553	0.0198534	LAPTM4A	pseudobulk	up
MAN2A2	1.2297	5.73051	58.232	0.000527759	0.00771249	MAN2A2	pseudobulk	up
HDAC4	1.22668	2.67826	36.0407	0.00163628	0.0131325	HDAC4	pseudobulk	up
GOLGA8O	1.22614	0.635777	12.2033	0.016478	0.0470439	GOLGA8O	pseudobulk	up
VRK2	1.22459	4.10709	50.4266	0.000744615	0.00896945	VRK2	pseudobulk	up
DDB2	1.2226	3.33297	38.4036	0.00141264	0.012331	DDB2	pseudobulk	up
TNFSF10	1.22256	4.66193	14.9312	0.0110829	0.0366158	TNFSF10	pseudobulk	up
SLC41A2	1.22137	2.11111	27.5185	0.00301915	0.0179009	SLC41A2	pseudobulk	up
ZMYND15	1.22134	4.38829	56.3057	0.000572173	0.00796118	ZMYND15	pseudobulk	up
TTC21A	1.22048	2.1951	29.3485	0.00261334	0.0166686	TTC21A	pseudobulk	up
RSU1	1.21977	4.32583	33.3933	0.00194942	0.0143891	RSU1	pseudobulk	up
IKBKE	1.21943	5.12016	62.1871	0.000450471	0.00719617	IKBKE	pseudobulk	up
PLEKHA2	1.21902	5.69318	61.6368	0.000460241	0.00724504	PLEKHA2	pseudobulk	up
GALNT12	1.21706	1.07601	11.91	0.017259	0.0484749	GALNT12	pseudobulk	up
GLTP	1.21632	0.823761	13.6822	0.0131943	0.0408023	GLTP	pseudobulk	up
FAM76A	1.21579	3.67625	50.3172	0.000748481	0.00898257	FAM76A	pseudobulk	up
PJVK	1.21454	1.41938	15.162	0.010749	0.0360395	PJVK	pseudobulk	up
BRI3	1.21449	7.32028	56.0441	0.000578587	0.00796118	BRI3	pseudobulk	up
ADPRH	1.21391	3.53586	36.3384	0.00160542	0.0130615	ADPRH	pseudobulk	up
ST3GAL6	1.21354	4.82984	58.2439	0.0005275	0.00771249	ST3GAL6	pseudobulk	up
C10orf143	1.21319	1.78656	24.7788	0.00380935	0.0200614	C10orf143	pseudobulk	up
CDR2	1.21223	3.86324	25.9044	0.0034529	0.0191084	CDR2	pseudobulk	up
FBXL8	1.21141	2.21078	26.3007	0.00333918	0.0187673	FBXL8	pseudobulk	up
NDUFB9	1.21004	3.6521	20.5494	0.00571492	0.0250351	NDUFB9	pseudobulk	up
ZCRB1	1.2098	4.29047	46.9557	0.000881843	0.00980126	ZCRB1	pseudobulk	up
CMTM3	1.20883	6.64617	61.3929	0.000464665	0.00728832	CMTM3	pseudobulk	up
PTPDC1	1.20338	2.48511	23.1424	0.0044231	0.0217452	PTPDC1	pseudobulk	up
RTEL1	1.20319	3.48934	30.704	0.00235983	0.0157929	RTEL1	pseudobulk	up
SLC35C2	1.20275	4.28193	45.3178	0.000958954	0.0101461	SLC35C2	pseudobulk	up
SWAP70	1.20197	6.44678	25.6962	0.00351507	0.0192401	SWAP70	pseudobulk	up
NAGK	1.20146	7.22142	68.8755	0.000351703	0.00659442	NAGK	pseudobulk	up
TEC	1.20138	2.82907	26.6553	0.00324103	0.0185458	TEC	pseudobulk	up
DCAF4	1.19951	2.49679	31.7095	0.00219364	0.0152029	DCAF4	pseudobulk	up
PARP4	1.19835	5.0608	59.0169	0.000511034	0.00758713	PARP4	pseudobulk	up
LFNG	1.19803	3.89543	46.0082	0.000925358	0.00994052	LFNG	pseudobulk	up
TRIM26	1.19712	4.02621	27.0111	0.00314663	0.0183156	TRIM26	pseudobulk	up
TRAF3	1.19712	3.92714	51.2195	0.000717476	0.00880815	TRAF3	pseudobulk	up
RAD51AP1	1.1941	1.56275	20.7111	0.00562137	0.0248747	RAD51AP1	pseudobulk	up
CALHM2	1.19372	4.59334	38.2786	0.00142332	0.0123654	CALHM2	pseudobulk	up
SHLD2	1.19291	2.40132	24.6238	0.00386181	0.0202072	SHLD2	pseudobulk	up
CHST15	1.19254	4.59988	24.8475	0.00378541	0.0199837	CHST15	pseudobulk	up
DPH3	1.19039	3.67702	46.867	0.000885797	0.00982128	DPH3	pseudobulk	up
BAK1	1.18982	4.63376	36.4453	0.00159453	0.0130451	BAK1	pseudobulk	up
WSB2	1.18739	4.2758	53.0578	0.000659606	0.00847511	WSB2	pseudobulk	up
NSMAF	1.18735	3.81961	46.7005	0.000893278	0.00984706	NSMAF	pseudobulk	up
MYO1C	1.18707	3.976	50.7296	0.00073408	0.0089031	MYO1C	pseudobulk	up
NIN	1.18663	5.49518	39.8279	0.00129787	0.0118525	NIN	pseudobulk	up
CD180	1.18632	3.4224	20.7363	0.00560538	0.0248304	CD180	pseudobulk	up
LRRC37B	1.18526	3.45563	42.9304	0.00108914	0.0108664	LRRC37B	pseudobulk	up
GHITM	1.18509	3.87769	30.7141	0.00235807	0.0157929	GHITM	pseudobulk	up
RIT1	1.18504	3.7687	47.9343	0.000839828	0.00953852	RIT1	pseudobulk	up
RAB11FIP1	1.18493	4.34333	32.518	0.0020713	0.0147808	RAB11FIP1	pseudobulk	up
TICAM1	1.18479	4.47859	38.3622	0.00141613	0.0123473	TICAM1	pseudobulk	up
CD99	1.18361	4.84294	35.3019	0.00171607	0.0134442	CD99	pseudobulk	up
CTU2	1.18355	2.98894	38.9786	0.00136472	0.0121814	CTU2	pseudobulk	up
TOR1B	1.18208	3.44894	12.8961	0.0148046	0.0439289	TOR1B	pseudobulk	up
LINS1	1.18164	3.94793	45.0346	0.000973234	0.0102323	LINS1	pseudobulk	up
ZNF334	1.18125	1.67306	19.1489	0.00664048	0.0271912	ZNF334	pseudobulk	up
SLC25A19	1.18069	4.02006	30.2829	0.00243468	0.01612	SLC25A19	pseudobulk	up
TACC3	1.1801	3.73874	47.0495	0.0008777	0.00979501	TACC3	pseudobulk	up
UBE2J1	1.17912	3.33126	27.4693	0.00303088	0.017946	UBE2J1	pseudobulk	up
ATP6AP1L	1.17824	1.05515	13.5691	0.0134097	0.0411959	ATP6AP1L	pseudobulk	up
RAB9A	1.17787	2.94255	35.8355	0.00165791	0.0132575	RAB9A	pseudobulk	up
EHHADH	1.17726	1.45503	18.772	0.00692426	0.0278894	EHHADH	pseudobulk	up
RTL6	1.17568	1.75886	17.8202	0.00771967	0.0297173	RTL6	pseudobulk	up
MB21D2	1.1745	1.8447	18.6701	0.00700388	0.0281233	MB21D2	pseudobulk	up
MAP7D1	1.17384	5.80526	26.8707	0.00318329	0.0183652	MAP7D1	pseudobulk	up
RAB34	1.17382	4.09284	25.9002	0.00345415	0.0191084	RAB34	pseudobulk	up
MYL5	1.17309	3.004	32.8597	0.00202256	0.014623	MYL5	pseudobulk	up
PDLIM7	1.17257	3.61379	25.3418	0.00362466	0.0195705	PDLIM7	pseudobulk	up
UBXN2A	1.17213	2.57383	26.3429	0.00332707	0.0187552	UBXN2A	pseudobulk	up
GPR180	1.17117	2.51737	30.944	0.00231876	0.0156985	GPR180	pseudobulk	up
HS2ST1	1.16985	3.70839	17.9527	0.0076002	0.0293874	HS2ST1	pseudobulk	up
SPPL2A	1.16967	4.6897	55.8359	0.000583776	0.0080024	SPPL2A	pseudobulk	up
CA5B	1.16789	2.20618	21.9475	0.00496208	0.0231682	CA5B	pseudobulk	up
POLE4	1.1678	3.31718	35.6798	0.00167459	0.0132928	POLE4	pseudobulk	up
COPRS	1.16775	3.59997	16.3329	0.00923958	0.0329895	COPRS	pseudobulk	up
STK24	1.16754	5.52472	52.3431	0.000681295	0.0085926	STK24	pseudobulk	up
DNMT1	1.1673	5.41448	44.9449	0.000977795	0.010241	DNMT1	pseudobulk	up
GPRIN3	1.16432	4.52328	46.027	0.000924461	0.00994052	GPRIN3	pseudobulk	up
TLR3	1.16399	2.44933	27.8178	0.00294693	0.0176734	TLR3	pseudobulk	up
PIGH	1.1633	3.66824	45.5393	0.000948	0.0100735	PIGH	pseudobulk	up
TEDC1	1.16273	2.19778	27.1126	0.0031208	0.0182386	TEDC1	pseudobulk	up
CD300LF	1.16262	5.96746	14.8702	0.0111744	0.0367877	CD300LF	pseudobulk	up
RNF213	1.16249	7.01258	19.4477	0.00642486	0.0267218	RNF213	pseudobulk	up
FGD6	1.16197	2.8798	26.5177	0.00327844	0.0186229	FGD6	pseudobulk	up
SLC25A30	1.16176	3.77994	46.6077	0.000897492	0.00987543	SLC25A30	pseudobulk	up
CPT1A	1.16139	1.89169	20.0046	0.00605266	0.025805	CPT1A	pseudobulk	up
SELL	1.16027	2.35254	24.0038	0.00408396	0.0208512	SELL	pseudobulk	up
TPM4	1.15902	3.04283	24.4929	0.00390708	0.0203542	TPM4	pseudobulk	up
CASP8	1.15887	5.23414	56.8489	0.000559134	0.00791379	CASP8	pseudobulk	up
THAP6	1.15569	3.87134	33.481	0.00193777	0.0143568	THAP6	pseudobulk	up
NCK1	1.15551	4.88786	24.4742	0.00391346	0.0203631	NCK1	pseudobulk	up
TKT	1.15432	4.01237	15.3519	0.0104798	0.0354859	TKT	pseudobulk	up
SMYD2	1.15295	3.89418	27.296	0.00307392	0.018096	SMYD2	pseudobulk	up
OPLAH	1.15186	4.74015	50.6015	0.000738502	0.00892357	OPLAH	pseudobulk	up
MS4A4A	1.15094	5.34522	55.5899	0.000589986	0.00807056	MS4A4A	pseudobulk	up
NAGLU	1.1502	4.4363	24.2759	0.00398397	0.020566	NAGLU	pseudobulk	up
ADAR	1.14875	6.49182	45.5839	0.000945789	0.0100631	ADAR	pseudobulk	up
NPEPL1	1.14772	6.36805	62.2883	0.000448704	0.00719617	NPEPL1	pseudobulk	up
ACOT9	1.14727	5.30331	57.2524	0.000549717	0.00785747	ACOT9	pseudobulk	up
SGSH	1.14656	6.10647	11.7895	0.0175893	0.0490578	SGSH	pseudobulk	up
TDP2	1.14582	3.60433	41.6022	0.00117237	0.011235	TDP2	pseudobulk	up
MPND	1.14452	3.61663	35.7869	0.00166303	0.0132575	MPND	pseudobulk	up
SCARF2	1.14422	1.35085	13.4167	0.0137078	0.0417568	SCARF2	pseudobulk	up
ARHGAP30	1.1441	5.97299	55.276	0.000598045	0.00809463	ARHGAP30	pseudobulk	up
TBX19	1.14228	1.89727	21.6239	0.00512381	0.0236358	TBX19	pseudobulk	up
ANG	1.14004	1.82424	19.4887	0.00639766	0.0266569	ANG	pseudobulk	up
STK38L	1.13921	5.20707	53.1199	0.000657754	0.00846517	STK38L	pseudobulk	up
TAGLN2	1.13914	3.08473	22.2948	0.00479613	0.0226363	TAGLN2	pseudobulk	up
ACSL1	1.13781	5.42173	50.815	0.000731131	0.00889937	ACSL1	pseudobulk	up
TMCO4	1.13764	3.10404	23.1278	0.00442903	0.0217452	TMCO4	pseudobulk	up
C11orf1	1.1373	2.19006	16.6195	0.0089166	0.0322853	C11orf1	pseudobulk	up
CASP6	1.13728	2.99199	35.4527	0.00169941	0.013384	CASP6	pseudobulk	up
NT5DC1	1.1356	2.47948	14.5259	0.0117115	0.0379384	NT5DC1	pseudobulk	up
CTRL	1.13548	2.06745	24.0648	0.00406158	0.0207879	CTRL	pseudobulk	up
PDE4B	1.13389	3.97594	32.373	0.00209251	0.0148583	PDE4B	pseudobulk	up
MTMR6	1.13291	3.53457	41.8752	0.00115455	0.0111855	MTMR6	pseudobulk	up
ATOX1	1.13239	4.72166	29.8319	0.00251853	0.0163354	ATOX1	pseudobulk	up
RNLS	1.13201	2.16488	24.094	0.00405065	0.0207798	RNLS	pseudobulk	up
FLT3LG	1.13156	0.819635	12.6991	0.0152621	0.0447271	FLT3LG	pseudobulk	up
PRADC1	1.1313	2.4207	13.5997	0.0133449	0.0410762	PRADC1	pseudobulk	up
IFT88	1.13026	3.72687	37.443	0.00149803	0.0126943	IFT88	pseudobulk	up
COA6	1.13019	3.0177	35.8672	0.00165452	0.0132538	COA6	pseudobulk	up
MGMT	1.12927	4.83691	38.0983	0.00143897	0.0124444	MGMT	pseudobulk	up
C2orf92	1.12863	3.50749	20.9637	0.00547604	0.0245071	C2orf92	pseudobulk	up
MMP2	1.1284	5.38835	37.2175	0.0015191	0.0127816	MMP2	pseudobulk	up
DNPEP	1.12782	4.19686	43.4921	0.00105639	0.0106694	DNPEP	pseudobulk	up
COL27A1	1.12769	1.28553	15.9021	0.00976049	0.0339849	COL27A1	pseudobulk	up
TBC1D2B	1.1268	6.49216	60.4017	0.000483268	0.00741959	TBC1D2B	pseudobulk	up
GNL1	1.12668	2.93161	19.5916	0.00632569	0.0265206	GNL1	pseudobulk	up
SEPHS2	1.12613	3.97428	28.1227	0.00287569	0.0174466	SEPHS2	pseudobulk	up
MTMR14	1.12567	3.08553	29.7116	0.00254171	0.0164421	MTMR14	pseudobulk	up
FAM50A	1.12462	5.73508	38.9579	0.00136632	0.0121814	FAM50A	pseudobulk	up
ARAP2	1.12304	3.00916	33.6232	0.00191914	0.0142835	ARAP2	pseudobulk	up
SGPP1	1.12301	4.64921	50.9248	0.000727392	0.00887976	SGPP1	pseudobulk	up
CRABP2	1.12293	1.00033	12.7965	0.0150343	0.0443167	CRABP2	pseudobulk	up
C6orf163	1.12186	3.51469	12.8936	0.0148099	0.0439349	C6orf163	pseudobulk	up
SOD2	1.12147	6.23803	18.7029	0.00697607	0.0280375	SOD2	pseudobulk	up
HIRA	1.12114	3.98453	44.8783	0.000981235	0.0102539	HIRA	pseudobulk	up
HUS1B	1.12088	1.46514	12.9551	0.0146764	0.0437076	HUS1B	pseudobulk	up
GALM	1.12083	4.59978	47.2881	0.00086724	0.00973966	GALM	pseudobulk	up
SETD7	1.1193	3.72975	41.9555	0.00114938	0.0111847	SETD7	pseudobulk	up
ZNF319	1.11916	1.20604	15.1559	0.010758	0.0360395	ZNF319	pseudobulk	up
MEGF9	1.11827	1.09082	12.8762	0.0148547	0.0440076	MEGF9	pseudobulk	up
ZC3H12D	1.11729	3.5505	38.7382	0.00138444	0.0122488	ZC3H12D	pseudobulk	up
MGAT4A	1.11609	7.10829	62.6676	0.000442171	0.00719617	MGAT4A	pseudobulk	up
CMC2	1.11536	3.5229	28.6435	0.00275984	0.017199	CMC2	pseudobulk	up
USP30	1.11519	3.13838	31.234	0.00227007	0.0155672	USP30	pseudobulk	up
IER2	1.11494	5.96298	50.6649	0.000736297	0.00891343	IER2	pseudobulk	up
RNF227	1.11425	2.88978	13.7168	0.0131213	0.0406439	RNF227	pseudobulk	up
SMIM19	1.11282	3.58033	27.7643	0.0029594	0.0176995	SMIM19	pseudobulk	up
RAC2	1.11131	3.5062	37.9289	0.00145398	0.0125096	RAC2	pseudobulk	up
DNHD1	1.1113	3.17071	30.9101	0.00232437	0.0157003	DNHD1	pseudobulk	up
NDST1	1.11066	3.07224	33.6928	0.00191008	0.0142821	NDST1	pseudobulk	up
TMCC3	1.11061	4.13011	40.1878	0.00127098	0.0117383	TMCC3	pseudobulk	up
NRBP2	1.1081	5.47196	51.6764	0.000702439	0.00873864	NRBP2	pseudobulk	up
CBLB	1.10793	4.76818	35.5681	0.00168666	0.0133411	CBLB	pseudobulk	up
FAM83H	1.10654	2.21371	24.0261	0.00407567	0.0208303	FAM83H	pseudobulk	up
SNX6	1.10559	5.25468	52.3867	0.00067994	0.0085926	SNX6	pseudobulk	up
SPHK1	1.10538	4.00061	41.7087	0.00116535	0.0112002	SPHK1	pseudobulk	up
GPI	1.10427	3.31994	26.4467	0.00329799	0.0186795	GPI	pseudobulk	up
PFKFB4	1.10395	2.11306	23.1396	0.00442452	0.0217452	PFKFB4	pseudobulk	up
PRELID2	1.10331	3.76251	29.2952	0.00262375	0.0167187	PRELID2	pseudobulk	up
NFU1	1.10202	3.65323	19.0061	0.00674415	0.0274553	NFU1	pseudobulk	up
EEF1G	1.10163	5.59874	15.5422	0.0102217	0.0349745	EEF1G	pseudobulk	up
PTPN1	1.10149	4.93058	46.7793	0.000889706	0.00984706	PTPN1	pseudobulk	up
WDR81	1.10098	6.38489	36.6228	0.00157673	0.0129751	WDR81	pseudobulk	up
UCN	1.10066	2.12928	23.6119	0.00423373	0.0212432	UCN	pseudobulk	up
PEX10	1.10048	2.76724	21.0204	0.00544452	0.024446	PEX10	pseudobulk	up
SCP2	1.09839	5.20269	23.8566	0.00413891	0.0209678	SCP2	pseudobulk	up
ARL11	1.09689	4.77319	38.4534	0.00140834	0.0123183	ARL11	pseudobulk	up
HIF1A	1.09625	3.88978	36.3184	0.00160747	0.0130619	HIF1A	pseudobulk	up
DST	1.09486	5.63614	32.0937	0.00213416	0.0150058	DST	pseudobulk	up
CAMLG	1.0947	3.35883	30.847	0.00233515	0.0157324	CAMLG	pseudobulk	up
TEX2	1.09443	4.466	34.4509	0.00181504	0.0139413	TEX2	pseudobulk	up
RAB38	1.09418	1.78357	17.7926	0.00774466	0.0297872	RAB38	pseudobulk	up
FAM177A1	1.09396	3.21553	33.2716	0.00196582	0.0144446	FAM177A1	pseudobulk	up
LENG9	1.09355	2.33487	24.6324	0.00385885	0.0202072	LENG9	pseudobulk	up
TESK2	1.09342	2.50869	13.4793	0.0135799	0.0415086	TESK2	pseudobulk	up
MT-ND1	1.09338	5.32043	16.644	0.0088888	0.032204	MT-ND1	pseudobulk	up
SLC16A5	1.09334	3.05857	28.4786	0.00279585	0.0172781	SLC16A5	pseudobulk	up
PIP4K2C	1.09326	3.46632	36.0705	0.00163306	0.0131325	PIP4K2C	pseudobulk	up
RBM47	1.09312	6.25421	11.8179	0.0175089	0.0489274	RBM47	pseudobulk	up
POR	1.09308	3.49412	16.2496	0.00933677	0.0332183	POR	pseudobulk	up
TK2	1.09292	5.43228	50.192	0.000752907	0.00899765	TK2	pseudobulk	up
DTWD2	1.09271	1.56714	17.0988	0.00841051	0.0312342	DTWD2	pseudobulk	up
MGAT4B	1.09176	5.6883	46.4029	0.000906856	0.00988679	MGAT4B	pseudobulk	up
MDH1	1.08991	2.66758	21.9343	0.00496824	0.0231804	MDH1	pseudobulk	up
SLC10A3	1.08954	3.04645	20.5657	0.00570529	0.025028	SLC10A3	pseudobulk	up
KIAA1841	1.08928	4.22992	45.3087	0.000959409	0.0101461	KIAA1841	pseudobulk	up
NMI	1.08752	3.89127	13.4991	0.0135403	0.04145	NMI	pseudobulk	up
RMND1	1.08747	3.87264	38.0161	0.00144623	0.0124659	RMND1	pseudobulk	up
MASTL	1.08667	3.74181	26.7005	0.00322866	0.0185042	MASTL	pseudobulk	up
STK40	1.08584	4.5825	35.8091	0.00166063	0.0132575	STK40	pseudobulk	up
COA7	1.08579	2.11562	21.8637	0.00500322	0.0232687	COA7	pseudobulk	up
DDX28	1.08567	2.42341	12.3822	0.0160157	0.0461621	DDX28	pseudobulk	up
AVIL	1.08556	2.57415	21.4249	0.00522652	0.0239068	AVIL	pseudobulk	up
SARS	1.08554	2.51715	26.4423	0.00329933	0.0186795	SARS	pseudobulk	up
BPHL	1.08545	3.6761	36.7954	0.00155973	0.0128826	BPHL	pseudobulk	up
AMDHD2	1.08303	6.66759	25.3037	0.00363662	0.0195864	AMDHD2	pseudobulk	up
GOLIM4	1.08127	4.25001	35.5324	0.00169058	0.0133628	GOLIM4	pseudobulk	up
VWA8	1.08087	4.23476	37.4221	0.00149996	0.0126943	VWA8	pseudobulk	up
IFI27L2	1.08043	3.21665	34.6696	0.00178893	0.0138299	IFI27L2	pseudobulk	up
FMN1	1.08023	6.07161	49.2895	0.000786075	0.00921267	FMN1	pseudobulk	up
MOV10	1.07975	6.11359	41.943	0.00115014	0.0111847	MOV10	pseudobulk	up
ZNRD1	1.07949	2.71529	28.6307	0.00276272	0.017199	ZNRD1	pseudobulk	up
KCTD21	1.07878	1.31546	14.4652	0.0118119	0.0381077	KCTD21	pseudobulk	up
CHRAC1	1.07728	2.56736	26.5712	0.0032639	0.0185816	CHRAC1	pseudobulk	up
MICU1	1.07699	4.08557	14.8808	0.0111585	0.0367447	MICU1	pseudobulk	up
GRK6	1.07667	3.72968	37.0844	0.00153177	0.0128127	GRK6	pseudobulk	up
GCH1	1.0757	1.3078	12.9294	0.0147348	0.0438015	GCH1	pseudobulk	up
PLOD3	1.07552	4.95026	49.0443	0.000795437	0.00925175	PLOD3	pseudobulk	up
CNP	1.07527	4.16644	36.9867	0.00154114	0.0128428	CNP	pseudobulk	up
NR1H2	1.07196	4.05223	31.7777	0.00218277	0.0151921	NR1H2	pseudobulk	up
C16orf86	1.07164	2.98975	28.4335	0.00280584	0.0172963	C16orf86	pseudobulk	up
PTPRE	1.07126	5.98517	53.3875	0.000649904	0.00843905	PTPRE	pseudobulk	up
RUSC1	1.06954	3.73083	35.431	0.00170175	0.0133943	RUSC1	pseudobulk	up
BTBD8	1.06927	2.94998	22.5285	0.00468899	0.0223734	BTBD8	pseudobulk	up
SUMF1	1.06891	4.61991	45.4811	0.000950839	0.0100735	SUMF1	pseudobulk	up
CENPBD1	1.06712	2.83508	29.5682	0.00256962	0.0165542	CENPBD1	pseudobulk	up
SEPTIN10	1.06701	2.84542	26.4161	0.0033065	0.0187045	SEPTIN10	pseudobulk	up
ZNF697	1.06691	2.8627	13.1506	0.014252	0.0428743	ZNF697	pseudobulk	up
TBKBP1	1.06631	4.00329	38.3194	0.00141982	0.012353	TBKBP1	pseudobulk	up
CEP120	1.06558	4.3772	41.4902	0.00117975	0.011279	CEP120	pseudobulk	up
PGD	1.06509	4.82119	30.0915	0.00246978	0.0161956	PGD	pseudobulk	up
SPATS2	1.06458	3.53652	25.9617	0.00343608	0.0190681	SPATS2	pseudobulk	up
MYBBP1A	1.06396	4.84011	47.8238	0.000844412	0.00955731	MYBBP1A	pseudobulk	up
ARPIN	1.063	6.62953	26.0042	0.00342358	0.0190199	ARPIN	pseudobulk	up
MPG	1.06185	3.08115	25.5261	0.00356718	0.0194066	MPG	pseudobulk	up
MARVELD3	1.06159	1.16753	13.6153	0.0133173	0.0410373	MARVELD3	pseudobulk	up
ETFBKMT	1.06098	1.84123	18.57	0.00708222	0.0282899	ETFBKMT	pseudobulk	up
PHPT1	1.06086	5.61109	38.8331	0.00137655	0.0122287	PHPT1	pseudobulk	up
GSTK1	1.06065	6.54766	44.6992	0.000990501	0.0103078	GSTK1	pseudobulk	up
LRPAP1	1.06063	6.4134	27.7812	0.0029553	0.0176883	LRPAP1	pseudobulk	up
ARFGAP3	1.05959	4.1406	36.073	0.00163277	0.0131325	ARFGAP3	pseudobulk	up
MAP3K7CL	1.05944	1.89165	18.5821	0.00707264	0.0282689	MAP3K7CL	pseudobulk	up
IARS	1.05938	3.1859	32.021	0.00214529	0.0150517	IARS	pseudobulk	up
SLC52A2	1.05862	3.29067	34.1112	0.00185682	0.0140914	SLC52A2	pseudobulk	up
IQCG	1.0583	4.1487	30.4835	0.00239859	0.0159595	IQCG	pseudobulk	up
TMED5	1.05626	3.67192	29.5005	0.00258282	0.0166038	TMED5	pseudobulk	up
ATP8B3	1.05528	2.71042	24.978	0.00374222	0.0198498	ATP8B3	pseudobulk	up
ABHD6	1.05503	3.04538	31.1544	0.00228325	0.0156068	ABHD6	pseudobulk	up
PTRH1	1.05495	2.9854	22.4192	0.00473869	0.0224749	PTRH1	pseudobulk	up
ACOT13	1.05455	3.10127	31.3654	0.00224858	0.0154932	ACOT13	pseudobulk	up
ZMIZ2	1.05445	6.43109	33.7735	0.00189954	0.0142462	ZMIZ2	pseudobulk	up
ZNF672	1.05419	3.19596	30.2191	0.00244637	0.0161324	ZNF672	pseudobulk	up
TAGAP	1.05402	5.82693	44.981	0.000975945	0.010238	TAGAP	pseudobulk	up
SLC25A25	1.05374	4.29503	20.7435	0.00560113	0.0248303	SLC25A25	pseudobulk	up
LAIR1	1.05258	7.52314	38.1866	0.00143127	0.0124025	LAIR1	pseudobulk	up
B3GNT10	1.05204	1.91056	19.9014	0.0061192	0.0259946	B3GNT10	pseudobulk	up
NMD3	1.05179	4.21665	40.5083	0.00124764	0.0116022	NMD3	pseudobulk	up
ITPRIPL1	1.05125	2.3003	16.1616	0.00944149	0.0334476	ITPRIPL1	pseudobulk	up
ZBED1	1.0511	4.75778	46.1405	0.000919084	0.00993758	ZBED1	pseudobulk	up
NME7	1.051	2.22073	22.7011	0.00461224	0.022197	NME7	pseudobulk	up
HDX	1.05091	2.19504	19.0095	0.00674216	0.0274553	HDX	pseudobulk	up
RNASEH2B	1.04995	2.86284	28.9172	0.00270161	0.0169826	RNASEH2B	pseudobulk	up
RAB3IP	1.04979	1.81723	16.7694	0.00875387	0.0319468	RAB3IP	pseudobulk	up
PXDC1	1.04959	4.36769	21.0786	0.00541212	0.0243629	PXDC1	pseudobulk	up
IFNGR2	1.04882	7.05723	55.3861	0.0005952	0.00809463	IFNGR2	pseudobulk	up
GGA1	1.04864	6.70998	45.5762	0.000946166	0.0100631	GGA1	pseudobulk	up
HPS1	1.04856	5.53502	26.7054	0.0032273	0.0185042	HPS1	pseudobulk	up
TGM2	1.04854	2.269	12.6783	0.0153026	0.0447784	TGM2	pseudobulk	up
POLR2L	1.0485	3.93484	38.407	0.00141231	0.012331	POLR2L	pseudobulk	up
CRYZL1	1.04849	2.37078	13.2278	0.0140904	0.0425254	CRYZL1	pseudobulk	up
RILP	1.04754	4.45675	40.2844	0.00126387	0.0116892	RILP	pseudobulk	up
ALKBH2	1.04533	1.88179	18.1396	0.0074387	0.0290929	ALKBH2	pseudobulk	up
MYOM1	1.04531	1.91314	14.2486	0.0121715	0.0388021	MYOM1	pseudobulk	up
NBN	1.04445	3.4875	31.9581	0.0021549	0.0150866	NBN	pseudobulk	up
SPIRE2	1.04291	2.45767	19.9853	0.00606434	0.0258137	SPIRE2	pseudobulk	up
MLKL	1.04241	5.79287	42.0725	0.00114187	0.0111621	MLKL	pseudobulk	up
LANCL1	1.04229	3.16072	28.6197	0.00276502	0.017199	LANCL1	pseudobulk	up
LTB	1.03866	2.0872	15.3016	0.0105504	0.0356368	LTB	pseudobulk	up
CCR5	1.03826	1.38652	15.3181	0.0105285	0.035595	CCR5	pseudobulk	up
FAM174C	1.03736	3.75902	34.7962	0.00177398	0.0137555	FAM174C	pseudobulk	up
SPP1	1.0369	8.65702	26.1767	0.00337378	0.0188475	SPP1	pseudobulk	up
OST4	1.03686	2.75823	25.239	0.00365743	0.0196391	OST4	pseudobulk	up
RNASEK	1.03599	4.94035	33.1174	0.00198671	0.0145222	RNASEK	pseudobulk	up
SRGN	1.03582	6.45243	50.3406	0.00074763	0.00898257	SRGN	pseudobulk	up
GNG10	1.03344	3.94934	28.3048	0.0028344	0.0173487	GNG10	pseudobulk	up
FAM104B	1.03261	1.90413	15.8322	0.00984653	0.0341113	FAM104B	pseudobulk	up
ST13	1.03184	2.44157	19.1954	0.00660499	0.0270968	ST13	pseudobulk	up
CCDC125	1.0315	4.34605	41.7778	0.00116083	0.0112002	CCDC125	pseudobulk	up
JADE2	1.03145	3.77243	37.594	0.00148414	0.012634	JADE2	pseudobulk	up
DECR1	1.03105	4.162	40.091	0.00127814	0.0117712	DECR1	pseudobulk	up
MYO9A	1.02798	2.86119	20.3168	0.0058555	0.0253447	MYO9A	pseudobulk	up
PJA1	1.02707	2.35019	17.4256	0.00808642	0.0306233	PJA1	pseudobulk	up
ANOS1	1.02701	4.44487	36.5622	0.00158278	0.0130153	ANOS1	pseudobulk	up
ORMDL2	1.02554	3.5221	34.5322	0.00180529	0.0138827	ORMDL2	pseudobulk	up
SLC25A34	1.02524	2.18609	11.9998	0.017008	0.0480213	SLC25A34	pseudobulk	up
INAFM1	1.02519	3.17395	29.9649	0.00249348	0.0162686	INAFM1	pseudobulk	up
RPA1	1.0235	3.66236	35.1162	0.00173704	0.0135658	RPA1	pseudobulk	up
DALRD3	1.02258	2.26766	15.6833	0.0100369	0.0345417	DALRD3	pseudobulk	up
BCAT1	1.02155	3.64251	33.6381	0.00191715	0.0142835	BCAT1	pseudobulk	up
TSHZ1	1.02151	2.04831	15.0111	0.0109659	0.0364226	TSHZ1	pseudobulk	up
TNFSF8	1.02095	2.78481	23.0834	0.00444764	0.0217553	TNFSF8	pseudobulk	up
UBA6	1.02075	5.05928	43.4202	0.00106049	0.0106891	UBA6	pseudobulk	up
GGPS1	1.02071	1.4551	12.7895	0.0150473	0.0443167	GGPS1	pseudobulk	up
MTHFS	1.01878	3.08015	16.8209	0.00869794	0.031847	MTHFS	pseudobulk	up
GPR137B	1.0173	5.08827	24.6237	0.00386145	0.0202072	GPR137B	pseudobulk	up
LRP1	1.01727	7.86348	55.2558	0.000598568	0.00809463	LRP1	pseudobulk	up
COX7A2	1.01601	4.56467	34.4029	0.00182085	0.0139613	COX7A2	pseudobulk	up
CTTNBP2NL	1.0158	5.88261	47.1678	0.000872473	0.00976481	CTTNBP2NL	pseudobulk	up
LRWD1	1.01523	2.17936	15.7821	0.00990991	0.0342763	LRWD1	pseudobulk	up
ACAT1	1.01439	3.76361	36.1647	0.00162324	0.0131085	ACAT1	pseudobulk	up
RAD51B	1.01426	4.99872	43.9525	0.00103055	0.010515	RAD51B	pseudobulk	up
ANAPC4	1.01395	5.16078	42.3817	0.00112245	0.011069	ANAPC4	pseudobulk	up
LRRFIP2	1.01378	4.55234	41.7575	0.00116214	0.0112002	LRRFIP2	pseudobulk	up
TIMM10B	1.01361	5.05171	39.9872	0.00128586	0.0118101	TIMM10B	pseudobulk	up
GSDMD	1.01182	5.94147	43.9545	0.00103044	0.010515	GSDMD	pseudobulk	up
FAM120AOS	1.01045	5.46277	45.8354	0.000933589	0.00997816	FAM120AOS	pseudobulk	up
CDRT4	1.00955	3.9301	37.0276	0.0015372	0.0128346	CDRT4	pseudobulk	up
INPP4A	1.0087	4.84146	41.3872	0.00118661	0.011315	INPP4A	pseudobulk	up
RASSF1	1.00838	5.47521	45.7595	0.000937251	0.0100009	RASSF1	pseudobulk	up
SNRPD2	1.00759	2.11972	13.6426	0.0132633	0.0409585	SNRPD2	pseudobulk	up
XYLB	1.00697	2.91792	23.4532	0.00429623	0.0214237	XYLB	pseudobulk	up
DPYSL2	1.00681	5.95628	46.9407	0.000882489	0.00980126	DPYSL2	pseudobulk	up
ZNF496	1.00655	4.7201	31.4325	0.0022376	0.0154298	ZNF496	pseudobulk	up
PINLYP	1.00563	1.36935	12.939	0.0147122	0.0437654	PINLYP	pseudobulk	up
MLX	1.00511	5.17927	37.8561	0.00146041	0.0125384	MLX	pseudobulk	up
RHOQ	1.00429	4.56021	33.7644	0.00190074	0.0142462	RHOQ	pseudobulk	up
CPLANE1	1.00386	4.15482	27.042	0.00313862	0.0182973	CPLANE1	pseudobulk	up
CD47	1.00217	4.45059	33.5958	0.00192265	0.0142885	CD47	pseudobulk	up
EVA1B	1.00202	3.84674	24.3901	0.00394319	0.0204282	EVA1B	pseudobulk	up
CAPN1	1.00185	4.93626	35.7222	0.00166994	0.0132801	CAPN1	pseudobulk	up
USP3	1.00146	4.94743	42.5569	0.00111165	0.0109986	USP3	pseudobulk	up
SFT2D2	1.00117	4.27343	38.648	0.00139193	0.0122714	SFT2D2	pseudobulk	up
NR1D2	1.00109	4.41922	30.9864	0.00231136	0.0156774	NR1D2	pseudobulk	up
DYNLT3	1.00073	2.22477	19.0788	0.00669062	0.0273364	DYNLT3	pseudobulk	up
GGA2	1.0005	6.90449	49.3391	0.000784198	0.00920304	GGA2	pseudobulk	up
HEATR6	1.00024	2.07693	16.2121	0.00938159	0.0333245	HEATR6	pseudobulk	up
LRIG3	-1.14236	1.48309	17.7095	0.00782053	0.0299292	LRIG3	pseudobulk	down
IPCEF1	-1.15378	5.58591	56.6553	0.000563729	0.007936	IPCEF1	pseudobulk	down
MKNK1	-1.33815	7.81865	92.8549	0.000169142	0.00452967	MKNK1	pseudobulk	down
CITED4	-1.39786	3.25261	32.3205	0.00210032	0.0148856	CITED4	pseudobulk	down
MYBPH	-1.3984	1.5105	19.5537	0.00635239	0.0265871	MYBPH	pseudobulk	down
PEBP4	-1.46962	1.01484	15.0328	0.010938	0.0363763	PEBP4	pseudobulk	down
RTKN	-1.47747	4.23109	54.8527	0.000609162	0.00817856	RTKN	pseudobulk	down
VSIR	-1.48023	6.27824	65.4377	0.000398235	0.00696788	VSIR	pseudobulk	down
CHD7	-1.51332	5.66737	78.5731	0.000255036	0.00552446	CHD7	pseudobulk	down
SPECC1	-1.54955	6.68613	114.043	0.000101606	0.00363906	SPECC1	pseudobulk	down
INKA1	-1.61131	5.29094	101.654	0.000135204	0.00413626	INKA1	pseudobulk	down
ADRB2	-1.62429	6.34168	115.696	9.80294886435184e-05	0.00357616	ADRB2	pseudobulk	down
PROX2	-1.64841	0.824109	26.9248	0.00317138	0.0183541	PROX2	pseudobulk	down
AHDC1	-1.6624	3.86552	94.6545	0.000161316	0.00445902	AHDC1	pseudobulk	down
CD320	-1.68069	0.698398	24.9056	0.00376897	0.0199291	CD320	pseudobulk	down
GBX2	-1.68456	4.33768	32.545	0.00206736	0.014775	GBX2	pseudobulk	down
PCDHGB7	-1.69881	2.446	16.9167	0.0085971	0.031648	PCDHGB7	pseudobulk	down
FSCN1	-1.69991	4.5989	110.981	0.000108727	0.00379195	FSCN1	pseudobulk	down
C19orf38	-1.73071	2.90876	47.8587	0.000843016	0.00955731	C19orf38	pseudobulk	down
GASK1B	-1.76624	4.68485	124.124	8.22628273790195e-05	0.00326301	GASK1B	pseudobulk	down
ADGRD1	-1.77158	2.07007	17.3981	0.00811291	0.0306548	ADGRD1	pseudobulk	down
EPHB3	-1.78115	4.49422	34.3195	0.00183104	0.0139687	EPHB3	pseudobulk	down
S100Z	-1.8189	4.80935	62.4037	0.000446708	0.00719617	S100Z	pseudobulk	down
CRIP3	-1.82074	0.891251	31.9611	0.00215749	0.0150915	CRIP3	pseudobulk	down
POGLUT3	-1.84524	2.75885	86.8342	0.000199555	0.00494294	POGLUT3	pseudobulk	down
ABCC4	-1.84716	6.31377	151.553	4.98847380558528e-05	0.00266438	ABCC4	pseudobulk	down
SLC2A5	-1.85801	3.75695	28.075	0.00288663	0.0174724	SLC2A5	pseudobulk	down
FADS2	-1.86126	2.84785	89.2163	0.00018669	0.00475841	FADS2	pseudobulk	down
CKB	-1.86182	7.56252	139.324	6.16125234350381e-05	0.00286136	CKB	pseudobulk	down
CDH23	-1.86199	6.04944	30.0852	0.00247092	0.0161956	CDH23	pseudobulk	down
LRRC56	-1.86735	2.14488	50.6203	0.000737985	0.00892357	LRRC56	pseudobulk	down
BIN1	-1.87281	8.57106	191.662	2.76019013027016e-05	0.00211885	BIN1	pseudobulk	down
PMEPA1	-1.87411	3.59116	105.944	0.000122039	0.0039972	PMEPA1	pseudobulk	down
DISP1	-1.87624	3.61112	112.288	0.000105611	0.00373502	DISP1	pseudobulk	down
ARC	-1.89897	6.79458	24.4829	0.00391042	0.0203554	ARC	pseudobulk	down
HPGDS	-1.9046	5.60305	146.646	5.41836402188347e-05	0.00274588	HPGDS	pseudobulk	down
TMEM273	-1.90517	4.97213	85.3092	0.000208423	0.00499067	TMEM273	pseudobulk	down
ATP2A1	-1.91441	3.08973	26.92	0.00317048	0.0183541	ATP2A1	pseudobulk	down
PLD4	-1.91771	6.91793	92.1564	0.000172325	0.0045708	PLD4	pseudobulk	down
SHOX2	-1.92755	6.88537	165.261	4.01194720805929e-05	0.00239068	SHOX2	pseudobulk	down
EMID1	-1.94724	3.51867	90.436	0.000180543	0.00468406	EMID1	pseudobulk	down
SESN3	-1.9787	4.17809	141.433	5.9336260831602e-05	0.00280913	SESN3	pseudobulk	down
CCDC163	-1.98877	1.04319	12.5133	0.0157097	0.0455283	CCDC163	pseudobulk	down
PCBP3	-1.99928	0.747876	33.0871	0.00199391	0.0145222	PCBP3	pseudobulk	down
BVES	-2.01681	2.27318	75.3868	0.00028228	0.00582872	BVES	pseudobulk	down
NXN	-2.01733	3.29373	34.7689	0.00177725	0.0137726	NXN	pseudobulk	down
GPBAR1	-2.02193	0.773337	33.2976	0.00196651	0.0144446	GPBAR1	pseudobulk	down
SLC37A3	-2.03193	1.32323	23.3512	0.00433866	0.0215202	SLC37A3	pseudobulk	down
PDK4	-2.03256	5.01519	98.7345	0.000145326	0.00424274	PDK4	pseudobulk	down
MRC1	-2.07654	5.47344	146.67	5.41617893186568e-05	0.00274588	MRC1	pseudobulk	down
JAM2	-2.08328	2.80469	105.7	0.000122753	0.0039972	JAM2	pseudobulk	down
PCDHGB6	-2.09992	1.96245	42.3333	0.00112575	0.011071	PCDHGB6	pseudobulk	down
SIGLEC11	-2.1297	4.55332	75.9424	0.000277199	0.00581583	SIGLEC11	pseudobulk	down
MAEL	-2.13125	1.66759	29.6012	0.00256541	0.016549	MAEL	pseudobulk	down
HHIPL1	-2.15407	1.129	29.1961	0.00266859	0.0168878	HHIPL1	pseudobulk	down
TANC1	-2.17788	3.39092	31.9876	0.00215044	0.0150634	TANC1	pseudobulk	down
DMWD	-2.17829	1.62126	50.5346	0.000741159	0.00894739	DMWD	pseudobulk	down
SPC24	-2.20118	1.03841	27.6328	0.00299596	0.017812	SPC24	pseudobulk	down
P3H3	-2.22158	0.581764	33.004	0.0020133	0.0145802	P3H3	pseudobulk	down
B3GNT5	-2.23698	4.89942	185.883	2.98226565957331e-05	0.00217076	B3GNT5	pseudobulk	down
TIAM1	-2.24705	6.61726	79.4988	0.000247823	0.00545377	TIAM1	pseudobulk	down
PLVAP	-2.27	4.31526	169.568	3.76033742354275e-05	0.00231474	PLVAP	pseudobulk	down
FAM118A	-2.27502	3.86249	67.513	0.000369217	0.00672006	FAM118A	pseudobulk	down
DMPK	-2.28557	0.682121	35.3016	0.00171946	0.0134606	DMPK	pseudobulk	down
GUCY1A1	-2.29694	1.71391	37.783	0.00146948	0.0125667	GUCY1A1	pseudobulk	down
VIPR1	-2.30255	1.0699	36.4378	0.0015998	0.0130483	VIPR1	pseudobulk	down
PALLD	-2.30772	1.78889	73.1757	0.000303664	0.00612491	PALLD	pseudobulk	down
KRTAP11-1	-2.30849	0.603893	24.1665	0.00406513	0.0207879	KRTAP11-1	pseudobulk	down
P2RY13	-2.34808	6.2447	219.927	1.94846769460656e-05	0.00194103	P2RY13	pseudobulk	down
SPNS3	-2.35028	4.94879	75.3287	0.000282747	0.00582914	SPNS3	pseudobulk	down
ADAMTS10	-2.35665	5.35377	203.556	2.37029136332187e-05	0.00203502	ADAMTS10	pseudobulk	down
PLXNA2	-2.38176	2.20828	99.288	0.000143396	0.00423577	PLXNA2	pseudobulk	down
ADGRG5	-2.39537	4.4084	130.431	7.26789458872227e-05	0.00305365	ADGRG5	pseudobulk	down
PDE9A	-2.40402	4.27414	123.787	8.28257392959487e-05	0.00327329	PDE9A	pseudobulk	down
ACKR2	-2.41494	1.70665	64.645	0.000410685	0.00702417	ACKR2	pseudobulk	down
SMAGP	-2.41549	1.25405	54.9425	0.000607869	0.00816961	SMAGP	pseudobulk	down
TNFRSF21	-2.43577	5.01324	185.59	2.99415572393459e-05	0.00217076	TNFRSF21	pseudobulk	down
AMH	-2.44991	2.08114	51.052	0.000723356	0.00886366	AMH	pseudobulk	down
KANK2	-2.48473	3.82887	194.781	2.65008528694176e-05	0.00209103	KANK2	pseudobulk	down
DUSP27	-2.50291	3.65024	188.716	2.8707184506598e-05	0.0021367	DUSP27	pseudobulk	down
RBMS3	-2.51768	0.588059	42.438	0.00112221	0.011069	RBMS3	pseudobulk	down
TLN2	-2.54267	5.45524	27.6536	0.00298587	0.0177844	TLN2	pseudobulk	down
CRYBB1	-2.55798	5.31709	204.299	2.34854683024691e-05	0.00203502	CRYBB1	pseudobulk	down
SYT6	-2.6387	5.69615	272.352	1.13196900542166e-05	0.00162332	SYT6	pseudobulk	down
SUSD3	-2.65031	4.33108	107.36	0.000118076	0.00395099	SUSD3	pseudobulk	down
GASK1A	-2.65364	2.69127	62.2215	0.000449972	0.00719617	GASK1A	pseudobulk	down
CX3CR1	-2.66725	6.73586	223.457	1.87137624432955e-05	0.00192295	CX3CR1	pseudobulk	down
SGCB	-2.71252	0.565145	28.4249	0.00284004	0.0173514	SGCB	pseudobulk	down
SCN9A	-2.71566	2.02452	38.6287	0.00139586	0.0122734	SCN9A	pseudobulk	down
MTUS1	-2.74452	5.45018	116.457	9.64442214727322e-05	0.00357449	MTUS1	pseudobulk	down
TDRD15	-2.77887	1.48222	46.8108	0.000889313	0.00984706	TDRD15	pseudobulk	down
SAXO2	-2.78388	0.335903	16.505	0.00911753	0.0326879	SAXO2	pseudobulk	down
TLR10	-2.81148	5.64098	122.007	8.58715467721041e-05	0.00335516	TLR10	pseudobulk	down
IGF2BP3	-2.83043	3.64332	213.669	2.09670617296265e-05	0.00198253	IGF2BP3	pseudobulk	down
DLL1	-2.85518	2.01203	101.159	0.000136995	0.00415445	DLL1	pseudobulk	down
CACNB4	-2.8577	4.96181	220.441	1.93708493497803e-05	0.00194103	CACNB4	pseudobulk	down
SYNDIG1	-2.86042	3.93712	28.5353	0.00278345	0.017242	SYNDIG1	pseudobulk	down
SDK1	-2.86739	3.49254	211.879	2.14203879678571e-05	0.00198253	SDK1	pseudobulk	down
GPR3	-2.87689	0.300297	39.1014	0.00137217	0.0122064	GPR3	pseudobulk	down
ITM2C	-2.89119	6.45314	351.714	5.89755422318645e-06	0.00152789	ITM2C	pseudobulk	down
SALL1	-2.89542	5.86569	338.987	6.4795675378497e-06	0.00153742	SALL1	pseudobulk	down
MMP28	-2.90171	0.799982	42.3622	0.00104113	0.0105745	MMP28	pseudobulk	down
MYOZ2	-2.9163	1.55856	48.4681	0.000830159	0.00948971	MYOZ2	pseudobulk	down
ADAMTSL2	-2.93886	4.32364	95.3902	0.000158267	0.00440956	ADAMTSL2	pseudobulk	down
ZNF853	-2.9443	0.296859	50.6695	0.000748892	0.00898257	ZNF853	pseudobulk	down
TMEM236	-2.94937	1.84862	56.9277	0.000557776	0.00791087	TMEM236	pseudobulk	down
TESC	-2.98331	4.76404	319.804	7.5184150546387e-06	0.00154771	TESC	pseudobulk	down
GABRA3	-2.98359	0.315008	30.2727	0.00246856	0.0161956	GABRA3	pseudobulk	down
PTPN14	-3.02071	2.35828	61.8208	0.000457285	0.00723341	PTPN14	pseudobulk	down
IGF1	-3.03913	5.49564	305.536	8.44621535063167e-06	0.00154771	IGF1	pseudobulk	down
SMIM35	-3.06664	2.94707	61.3709	0.000465269	0.00728904	SMIM35	pseudobulk	down
TMEM119	-3.09074	4.71679	104.205	0.000127152	0.00404729	TMEM119	pseudobulk	down
RASL11A	-3.17945	1.86612	105.12	0.000125687	0.00403527	RASL11A	pseudobulk	down
ARL5C	-3.21757	2.32285	128.352	7.58030909935854e-05	0.0031378	ARL5C	pseudobulk	down
TIFAB	-3.27196	1.79217	39.4685	0.00132735	0.0120191	TIFAB	pseudobulk	down
EFNB2	-3.29523	2.78656	195.611	2.62516609639115e-05	0.00209103	EFNB2	pseudobulk	down
DOCK6	-3.29812	3.3805	228.256	1.77508196062945e-05	0.00185548	DOCK6	pseudobulk	down
JAG1	-3.31764	5.79943	323.692	7.28999772966312e-06	0.00153886	JAG1	pseudobulk	down
ADGRG1	-3.35453	5.84164	23.9189	0.0041154	0.0209298	ADGRG1	pseudobulk	down
PAQR5	-3.36209	2.61396	196.739	2.59101535300021e-05	0.00209103	PAQR5	pseudobulk	down
LRRC36	-3.41311	0.279305	62.3207	0.000451522	0.00719617	LRRC36	pseudobulk	down
LYVE1	-3.46594	3.89351	316.614	7.71523310118865e-06	0.00154771	LYVE1	pseudobulk	down
SELENBP1	-3.53641	2.63408	182.98	3.17296432810216e-05	0.00220251	SELENBP1	pseudobulk	down
TDRD10	-3.54608	1.99334	128.167	7.60954466861415e-05	0.0031378	TDRD10	pseudobulk	down
APBA2	-3.5522	2.9295	253.997	1.35276798026984e-05	0.00174788	APBA2	pseudobulk	down
DHRS9	-3.55481	3.31965	290.87	9.58067840061324e-06	0.00157423	DHRS9	pseudobulk	down
ARMH4	-3.5921	0.470796	70.7513	0.000318793	0.00631597	ARMH4	pseudobulk	down
EGFL7	-3.72422	4.51438	137.919	6.32043082044003e-05	0.00287956	EGFL7	pseudobulk	down
AMOT	-3.76326	1.94575	102.423	0.000133595	0.00413131	AMOT	pseudobulk	down
BCAS4	-3.77827	0.826967	28.2208	0.00274883	0.0171802	BCAS4	pseudobulk	down
C12orf75	-3.85877	5.59741	236.839	1.61471992637622e-05	0.00184268	C12orf75	pseudobulk	down
LRP6	-3.90436	0.4634	58.7101	0.000519323	0.00765782	LRP6	pseudobulk	down
FAM166B	-3.98387	1.05092	110.083	0.000111952	0.00384262	FAM166B	pseudobulk	down
TJP1	-3.99196	1.60772	61.5094	0.000467128	0.00730938	TJP1	pseudobulk	down
IFNE	-4.00987	0.683534	75.9564	0.000281002	0.00581996	IFNE	pseudobulk	down
CDKL2	-4.05873	1.98314	20.4044	0.00586663	0.0253784	CDKL2	pseudobulk	down
LRIG1	-4.08014	3.92508	374.402	5.03014325083978e-06	0.00142703	LRIG1	pseudobulk	down
C4orf19	-4.09628	2.5644	109.438	0.000112909	0.00384262	C4orf19	pseudobulk	down
IL3RA	-4.30682	5.16465	325.39	7.19432831037977e-06	0.00153886	IL3RA	pseudobulk	down
AFF3	-4.3598	3.43387	236.042	1.63007201189355e-05	0.00184268	AFF3	pseudobulk	down
BANK1	-4.38067	0.269303	86.965	0.000152156	0.00430723	BANK1	pseudobulk	down
ARHGEF37	-4.45465	1.03762	102.321	0.00010234	0.00363906	ARHGEF37	pseudobulk	down
SOCS2	-4.61447	0.680037	46.1313	0.000842252	0.00955731	SOCS2	pseudobulk	down
INSC	-4.6311	0.332628	70.6276	0.000264133	0.00562824	INSC	pseudobulk	down
PLEKHG5	-4.74316	7.08976	250.301	1.40312912343238e-05	0.00177775	PLEKHG5	pseudobulk	down
TNFRSF25	-4.86388	6.88315	153.459	4.83441187601856e-05	0.00262871	TNFRSF25	pseudobulk	down
ABCG2	-4.96174	0.770535	43.7509	0.000963676	0.0101747	ABCG2	pseudobulk	down
CD36	-5.28929	4.87111	132.003	7.05824728018976e-05	0.00303083	CD36	pseudobulk	down
ZNF608	-5.66622	2.83479	351.83	6.20994250915229e-06	0.00152789	ZNF608	pseudobulk	down
TNFRSF13C	-5.94518	5.6099	874.485	5.70647526827212e-07	0.00130949	TNFRSF13C	pseudobulk	down
P2RY12	-6.05064	7.76097	123.519	8.32745319111793e-05	0.00327329	P2RY12	pseudobulk	down
TAL1	-6.22404	5.42082	194.122	2.67498515855979e-05	0.00209103	TAL1	pseudobulk	down
PCDHA4	-6.49383	0.191167	87.5696	3.69236360810763e-05	0.00230433	PCDHA4	pseudobulk	down
PCDHB2	-6.62294	0.573172	71.1915	9.22935083547382e-05	0.0034911	PCDHB2	pseudobulk	down
ADRA1B	-6.88831	0.613244	97.2837	2.66072235528452e-05	0.00209103	ADRA1B	pseudobulk	down
FGL1	-7.20072	2.68449	332.28	3.08682588761159e-06	0.00130949	FGL1	pseudobulk	down
SGSM1	-7.36619	2.85254	297.001	5.87456222219232e-06	0.00152789	SGSM1	pseudobulk	down
ACY3	-7.44746	6.75145	288.667	9.77110202387124e-06	0.00157423	ACY3	pseudobulk	down
NAV3	-8.22368	4.807	237.198	1.45813171033515e-05	0.00178381	NAV3	pseudobulk	down
PCDHB3	-8.36815	0.186051	85.6298	0.00061953	0.00828364	PCDHB3	pseudobulk	down
MMRN1	-9.11116	2.8545	156.183	5.54421756384949e-05	0.00275103	MMRN1	pseudobulk	down
AGR2	-9.52313	0.679742	158.703	0.000177603	0.00465763	AGR2	pseudobulk	down
KCNA5	-9.68329	1.54537	201.234	0.000109255	0.00379195	KCNA5	pseudobulk	down

## Sheet: deg_pseudobulk_results_all_8_11
Gene	logFC	logCPM	F	PValue	FDR	gene	type	regulation
LSR	11.4056	3.26445	433.269	2.24842350711567e-05	0.00203032	LSR	pseudobulk	up
NT5DC4	9.81207	1.66492	179.521	0.000138047	0.00417016	NT5DC4	pseudobulk	up
HOXB2	9.72212	1.68837	169.382	0.000155478	0.00437283	HOXB2	pseudobulk	up
CLIP4	9.62483	3.89561	471.765	1.40201152480678e-07	0.00130949	CLIP4	pseudobulk	up
MEIKIN	8.96284	1.31748	105.675	0.000405707	0.0069848	MEIKIN	pseudobulk	up
FAM241B	8.83483	0.982852	100.052	0.000453038	0.00719617	FAM241B	pseudobulk	up
CRTAM	8.54059	0.521685	81.0278	0.000692008	0.00865606	CRTAM	pseudobulk	up
WBP2NL	8.48065	0.576817	79.115	0.000725865	0.00886944	WBP2NL	pseudobulk	up
SLC46A2	8.43511	0.210219	72.6144	0.000861269	0.00969764	SLC46A2	pseudobulk	up
AC008687.4	8.41445	0.152338	70.687	0.00090863	0.00988752	AC008687.4	pseudobulk	up
TDRD9	8.33104	2.47247	249.332	1.0839383014801e-06	0.00130949	TDRD9	pseudobulk	up
PTK6	8.30641	0.34314	69.4475	0.000941153	0.0100262	PTK6	pseudobulk	up
CAMP	8.14901	0.237718	59.1523	0.00129293	0.0118322	CAMP	pseudobulk	up
LIF	8.09683	0.689558	64.4854	0.00109023	0.010869	LIF	pseudobulk	up
KLHL30	8.06657	-0.0885973	56.9967	0.00139096	0.0122714	KLHL30	pseudobulk	up
SPATA22	8.03175	-0.656992	44.6709	0.0022382	0.0154298	SPATA22	pseudobulk	up
ITPR3	7.95415	-0.0330493	52.8481	0.00161333	0.0130728	ITPR3	pseudobulk	up
GREB1	7.91325	0.0959701	53.6384	0.0015671	0.0129231	GREB1	pseudobulk	up
EMP2	7.90885	0.614945	56.8356	0.00139873	0.0122734	EMP2	pseudobulk	up
ZFP57	7.87453	0.61554	51.2402	0.00171385	0.0134442	ZFP57	pseudobulk	up
COL22A1	7.75046	-0.285727	46.2469	0.00209269	0.0148583	COL22A1	pseudobulk	up
CYP27A1	7.61463	6.22321	262.285	1.25927179877303e-05	0.0016908	CYP27A1	pseudobulk	up
TM4SF19	7.54378	2.10073	204.127	4.11409599939518e-06	0.00130949	TM4SF19	pseudobulk	up
PTH2R	7.52729	-0.549727	38.8279	0.00293212	0.0176333	PTH2R	pseudobulk	up
TRIB3	7.50324	2.11456	140.666	8.66364387864127e-06	0.00154771	TRIB3	pseudobulk	up
SNED1	7.48069	-0.262148	39.5086	0.00283602	0.0173487	SNED1	pseudobulk	up
GPR18	7.44905	-0.285345	38.5669	0.00297025	0.017747	GPR18	pseudobulk	up
CSMD1	7.42361	-0.100097	37.2738	0.00317041	0.0183541	CSMD1	pseudobulk	up
LYPD5	7.39412	-0.448808	36.2481	0.00334371	0.0187718	LYPD5	pseudobulk	up
KLF8	7.37692	-0.105094	37.1768	0.00318623	0.0183658	KLF8	pseudobulk	up
CUZD1	7.37311	-0.272697	36.6963	0.00326629	0.0185816	CUZD1	pseudobulk	up
ADD2	7.34238	-0.829942	31.8719	0.00426651	0.0213325	ADD2	pseudobulk	up
PRICKLE1	7.29277	-0.570899	33.3106	0.00392546	0.0203849	PRICKLE1	pseudobulk	up
ALOX15B	7.26362	3.56267	228.798	1.48218155878184e-05	0.00179097	ALOX15B	pseudobulk	up
CES1	7.23796	1.94438	161.206	6.57076914971538e-05	0.00292657	CES1	pseudobulk	up
AKR1C8P	7.21795	-0.42786	32.9064	0.00401708	0.0206715	AKR1C8P	pseudobulk	up
CPA3	7.20872	-0.685289	30.5536	0.00461895	0.0222098	CPA3	pseudobulk	up
KMO	7.19464	2.75905	173.822	2.03676036066042e-05	0.00198253	KMO	pseudobulk	up
MLPH	7.19463	4.80499	625.279	1.4186179616906e-06	0.00130949	MLPH	pseudobulk	up
SLC39A4	7.18228	-0.529433	31.1736	0.00444803	0.0217553	SLC39A4	pseudobulk	up
CROCC2	7.1252	-0.926846	29.1196	0.00505357	0.0234277	CROCC2	pseudobulk	up
UTS2	7.1242	-0.187996	30.6592	0.00458917	0.022181	UTS2	pseudobulk	up
TPD52L1	7.11384	-0.848343	28.9653	0.00510392	0.0235848	TPD52L1	pseudobulk	up
ALKAL2	7.10562	1.75601	159.524	3.09041152164905e-05	0.00220251	ALKAL2	pseudobulk	up
CYP1B1	7.09405	-0.635072	29.5863	0.00490571	0.0229873	CYP1B1	pseudobulk	up
PNMA6A	6.9802	-0.647203	27.3458	0.00568017	0.0249936	PNMA6A	pseudobulk	up
C12orf42	6.96029	-1.07276	24.9554	0.00672388	0.0274068	C12orf42	pseudobulk	up
IL1R1	6.94241	-0.120736	28.84	0.00514533	0.0237099	IL1R1	pseudobulk	up
SAMD12	6.89443	1.24215	95.9399	3.10635344169296e-05	0.00220251	SAMD12	pseudobulk	up
CD52	6.89059	1.33438	100.647	2.478927054672e-05	0.00207372	CD52	pseudobulk	up
CD8B2	6.87841	-0.893141	24.02	0.00721084	0.028602	CD8B2	pseudobulk	up
LY9	6.87715	2.38735	151.444	1.09340928148641e-05	0.00160326	LY9	pseudobulk	up
DNAJC5B	6.85271	2.14106	154.476	1.28704775073736e-05	0.0016908	DNAJC5B	pseudobulk	up
USP6	6.81955	-1.23298	22.2174	0.00830894	0.0310603	USP6	pseudobulk	up
ADAM12	6.78315	-1.22546	22.3042	0.00825057	0.0309263	ADAM12	pseudobulk	up
TPSD1	6.7665	-1.4529	19.3925	0.010601	0.0357661	TPSD1	pseudobulk	up
MDGA1	6.7627	-1.37051	20.4375	0.00965491	0.0338518	MDGA1	pseudobulk	up
FCRLB	6.75476	-0.613286	23.4935	0.00750823	0.0292353	FCRLB	pseudobulk	up
MACC1	6.71156	4.12334	675.687	1.16413902653374e-06	0.00130949	MACC1	pseudobulk	up
CAVIN3	6.67499	-0.770768	22.3755	0.00820304	0.0308455	CAVIN3	pseudobulk	up
SERPINE1	6.67416	1.91584	114.375	3.34371017493114e-05	0.00223958	SERPINE1	pseudobulk	up
TPSG1	6.66923	-1.56689	18.1708	0.0118918	0.0382519	TPSG1	pseudobulk	up
EVC	6.65865	2.19145	282.593	2.45318414217258e-06	0.00130949	EVC	pseudobulk	up
ZNF257	6.6542	-1.013	21.177	0.00905913	0.03255	ZNF257	pseudobulk	up
CD2	6.63733	-1.76011	16.9301	0.0134562	0.0413086	CD2	pseudobulk	up
ESPNL	6.61898	-1.29021	20.0595	0.00998217	0.0344258	ESPNL	pseudobulk	up
CHRNA1	6.59663	0.867301	114.512	4.16769066063305e-05	0.00241935	CHRNA1	pseudobulk	up
ALDH1A1	6.58908	4.94313	525.786	2.13018082294883e-06	0.00130949	ALDH1A1	pseudobulk	up
TPRG1	6.58303	4.14233	612.131	1.4765874725066e-06	0.00130949	TPRG1	pseudobulk	up
ETV7	6.56193	-1.51098	17.7854	0.0123476	0.0391604	ETV7	pseudobulk	up
PAX8	6.55042	-1.03154	19.7731	0.0102412	0.035016	PAX8	pseudobulk	up
HTRA4	6.53937	5.15928	598.446	1.52080938080009e-06	0.00130949	HTRA4	pseudobulk	up
ZBTB16	6.53496	-0.719219	20.5743	0.00954045	0.0336403	ZBTB16	pseudobulk	up
CLEC2B	6.52601	4.28756	413.45	4.04749000899985e-06	0.00130949	CLEC2B	pseudobulk	up
LGALS2	6.52233	-0.812805	19.8352	0.0101842	0.0348828	LGALS2	pseudobulk	up
OR2C3	6.51915	-1.36376	18.3064	0.0117374	0.0379516	OR2C3	pseudobulk	up
SCIN	6.51722	4.28583	505.442	2.41314138720455e-06	0.00130949	SCIN	pseudobulk	up
ADAMDEC1	6.51392	3.9393	76.3714	0.000184887	0.00473419	ADAMDEC1	pseudobulk	up
PARD3B	6.51011	-1.32534	18.7011	0.0113044	0.0371124	PARD3B	pseudobulk	up
TACSTD2	6.49919	-0.238959	21.4181	0.00887657	0.0321955	TACSTD2	pseudobulk	up
MS4A2	6.49143	-1.42922	16.7065	0.0137702	0.0418988	MS4A2	pseudobulk	up
CCDC141	6.48061	-1.13121	18.4769	0.0115474	0.0376009	CCDC141	pseudobulk	up
HIST1H1A	6.47839	-1.16464	18.4974	0.0115248	0.0375621	HIST1H1A	pseudobulk	up
IFI27	6.44213	5.29775	157.323	4.55887634407372e-05	0.00253739	IFI27	pseudobulk	up
INPP5J	6.44172	1.61913	233.541	4.31084521650178e-06	0.00133944	INPP5J	pseudobulk	up
CD22	6.43824	3.58788	480.986	2.81119039793899e-06	0.00130949	CD22	pseudobulk	up
FCGR2B	6.41738	3.51361	155.87	4.17129488279464e-05	0.00241935	FCGR2B	pseudobulk	up
DPP6	6.37256	-0.55275	18.724	0.0112801	0.0370886	DPP6	pseudobulk	up
HSH2D	6.36463	2.33418	135.365	3.16222513851898e-05	0.00220251	HSH2D	pseudobulk	up
KLHDC7B	6.32784	0.587019	94.2838	4.56924579330228e-05	0.00253739	KLHDC7B	pseudobulk	up
PTCHD4	6.3174	-1.47549	16.1046	0.0146719	0.0437076	PTCHD4	pseudobulk	up
TVP23A	6.29747	2.22637	109.691	2.57018461876336e-05	0.00209103	TVP23A	pseudobulk	up
CHRNA6	6.29469	1.7263	106.49	4.33544832419227e-05	0.00248147	CHRNA6	pseudobulk	up
CLEC12A	6.29414	1.92533	188.134	1.25477374493108e-05	0.0016908	CLEC12A	pseudobulk	up
FBN2	6.28051	-1.42646	15.5482	0.0155855	0.0452884	FBN2	pseudobulk	up
RNF32	6.27552	-1.33874	15.9114	0.0149799	0.0442324	RNF32	pseudobulk	up
IL1R2	6.26024	-1.25082	16.1348	0.0146246	0.0436232	IL1R2	pseudobulk	up
VNN2	6.25134	2.41127	234.062	1.29036532870606e-05	0.0016908	VNN2	pseudobulk	up
TESPA1	6.23739	-1.0178	15.8557	0.0150706	0.044323	TESPA1	pseudobulk	up
CR1L	6.22857	0.415208	50.7145	0.000342792	0.00654968	CR1L	pseudobulk	up
HES2	6.22031	-1.4611	15.3195	0.0159856	0.0461043	HES2	pseudobulk	up
PLEKHA4	6.19516	-1.63157	14.0672	0.0184725	0.0505168	PLEKHA4	pseudobulk	up
BEAN1	6.1871	2.91517	165.036	3.16837398167826e-05	0.00220251	BEAN1	pseudobulk	up
IFI44L	6.17142	6.54712	86.5704	0.000201078	0.00494294	IFI44L	pseudobulk	up
SLC9A7	6.16852	3.78396	438.297	3.51340187655911e-06	0.00130949	SLC9A7	pseudobulk	up
STEAP3	6.16711	3.67631	179.586	3.38332980335026e-05	0.00223958	STEAP3	pseudobulk	up
OR3A1	6.15484	-1.86371	12.5898	0.0222189	0.0567986	OR3A1	pseudobulk	up
PCSK6	6.14193	-1.33118	14.4963	0.0175594	0.0490316	PCSK6	pseudobulk	up
SAMD13	6.13096	0.669434	76.2644	5.66851329339916e-05	0.00277057	SAMD13	pseudobulk	up
LGALS3BP	6.12831	6.42942	299.465	8.89489546811459e-06	0.00154771	LGALS3BP	pseudobulk	up
AHNAK	6.1154	6.65705	185.687	2.99116930058606e-05	0.00217076	AHNAK	pseudobulk	up
ZNF541	6.10376	-1.74141	12.7253	0.0218306	0.0560644	ZNF541	pseudobulk	up
CPA6	6.09739	0.259262	69.5329	7.43471854235635e-05	0.00309978	CPA6	pseudobulk	up
TTN	6.09708	-1.32523	13.9067	0.0188321	0.0511026	TTN	pseudobulk	up
ABCA6	6.07438	-1.18483	14.4242	0.0177081	0.0492731	ABCA6	pseudobulk	up
SNTB1	6.06775	2.61455	174.841	3.43231162505982e-05	0.00223958	SNTB1	pseudobulk	up
DNASE2B	6.0607	1.7041	105.164	7.86216759688362e-05	0.00318638	DNASE2B	pseudobulk	up
CD72	6.05589	3.31039	442.3	3.44117301789232e-06	0.00130949	CD72	pseudobulk	up
ZDHHC23	6.04249	-0.951806	14.2855	0.0179994	0.0497968	ZDHHC23	pseudobulk	up
XKR3	6.03943	-0.981772	14.3053	0.0179574	0.0497439	XKR3	pseudobulk	up
FPR3	6.03092	4.77303	206.399	2.30258932253922e-05	0.00203032	FPR3	pseudobulk	up
MDFIC	6.02955	4.74575	328.028	7.08021606557924e-06	0.00153886	MDFIC	pseudobulk	up
ZBP1	6.0265	4.54467	250.695	1.43654208999967e-05	0.00178381	ZBP1	pseudobulk	up
SERINC2	6.025	1.52525	183.372	8.51785733420333e-06	0.00154771	SERINC2	pseudobulk	up
WDR86	6.02495	-1.08029	14.1559	0.018278	0.050248	WDR86	pseudobulk	up
AIM2	6.01972	2.11551	82.6293	6.79910011727257e-05	0.00297746	AIM2	pseudobulk	up
MMP9	6.01683	1.449	32.4822	0.00285799	0.017404	MMP9	pseudobulk	up
MPZL3	5.99947	-1.30574	12.7792	0.0216787	0.0558677	MPZL3	pseudobulk	up
PLEKHG1	5.99947	-1.08351	13.1399	0.0207024	0.0541516	PLEKHG1	pseudobulk	up
ADARB2	5.9916	-1.10126	13.5192	0.0197445	0.0526331	ADARB2	pseudobulk	up
PRLR	5.96534	1.31301	173.104	1.04372359209572e-05	0.00159187	PRLR	pseudobulk	up
SVIL	5.93569	-1.43344	12.5735	0.0222665	0.0568978	SVIL	pseudobulk	up
ACP5	5.91105	5.85474	864.949	5.87443512279687e-07	0.00130949	ACP5	pseudobulk	up
COL6A1	5.89177	0.872503	76.1124	0.000193472	0.00486167	COL6A1	pseudobulk	up
DDO	5.88848	1.19462	161.931	1.20028177239302e-05	0.0016908	DDO	pseudobulk	up
RUFY4	5.87594	3.57564	380.487	5.02073514586853e-06	0.00142703	RUFY4	pseudobulk	up
NLRP2	5.87372	-0.126005	31.8303	0.00194089	0.0143568	NLRP2	pseudobulk	up
LY6E	5.86742	4.88429	131.854	7.08726357977605e-05	0.00303083	LY6E	pseudobulk	up
ATP8B1	5.86052	1.5011	160.801	1.06035923526716e-05	0.00159187	ATP8B1	pseudobulk	up
GPNMB	5.83178	8.92324	928.732	4.88384817306773e-07	0.00130949	GPNMB	pseudobulk	up
DDTL	5.82892	1.86064	191.951	1.55244840388485e-05	0.00180888	DDTL	pseudobulk	up
NAALADL1	5.81154	0.324555	59.9641	0.00012016	0.0039972	NAALADL1	pseudobulk	up
AKR1C2	5.79866	-1.18982	12.0311	0.0239346	0.0594719	AKR1C2	pseudobulk	up
IL7	5.77767	1.12622	46.0347	0.000337371	0.00651285	IL7	pseudobulk	up
HES4	5.76627	1.95995	127.334	1.68752599576217e-05	0.00184268	HES4	pseudobulk	up
ILDR1	5.7571	-0.907102	12.0351	0.0239215	0.0594561	ILDR1	pseudobulk	up
ALDH3A1	5.753	-1.70142	10.9275	0.0279552	0.0657325	ALDH3A1	pseudobulk	up
CR1	5.74814	2.76479	271.583	1.13059795056212e-05	0.00162332	CR1	pseudobulk	up
LAMC1	5.7438	-1.20696	11.5994	0.0253982	0.0618742	LAMC1	pseudobulk	up
CD207	5.74379	-0.5767	12.572	0.022271	0.0568982	CD207	pseudobulk	up
SDS	5.7308	5.47118	633.286	1.30876044242501e-06	0.00130949	SDS	pseudobulk	up
RHEX	5.71065	-2.0741	9.41969	0.0352919	0.077262	RHEX	pseudobulk	up
GYPE	5.71065	-1.82941	9.70874	0.0336793	0.0747984	GYPE	pseudobulk	up
HOXA4	5.70541	-1.55479	10.3605	0.0304224	0.0695172	HOXA4	pseudobulk	up
PRDM5	5.70541	-1.44528	10.5018	0.0297781	0.0686451	PRDM5	pseudobulk	up
IDO1	5.69499	-1.17587	11.1429	0.0270953	0.0644164	IDO1	pseudobulk	up
IL1RL2	5.69081	-1.3133	10.9913	0.0276962	0.0653471	IL1RL2	pseudobulk	up
CLEC12B	5.68584	0.169433	59.9089	0.000146768	0.00425628	CLEC12B	pseudobulk	up
COL6A3	5.68138	-0.972048	11.4685	0.0258682	0.062584	COL6A3	pseudobulk	up
NLRP4	5.67612	-1.30096	10.9623	0.0278137	0.0655178	NLRP4	pseudobulk	up
S100A10	5.65575	3.68251	391.545	4.47890741967957e-06	0.00135539	S100A10	pseudobulk	up
MCOLN3	5.65066	1.17945	84.5098	5.96267349327886e-05	0.00280913	MCOLN3	pseudobulk	up
HOXB5	5.64757	-1.86273	8.97084	0.0380332	0.0814061	HOXB5	pseudobulk	up
OTOA	5.62792	2.12524	231.308	1.70583236970706e-05	0.00184268	OTOA	pseudobulk	up
TRIB2	5.61599	1.68907	67.385	0.000233823	0.00528838	TRIB2	pseudobulk	up
FFAR1	5.61071	-1.67563	10.0294	0.0320153	0.0720716	FFAR1	pseudobulk	up
PROC	5.56345	3.31596	369.633	5.3943653111909e-06	0.0014978	PROC	pseudobulk	up
HOXB6	5.55936	0.0903105	25.7434	0.00336554	0.0188257	HOXB6	pseudobulk	up
ESR1	5.55421	2.47238	286.275	1.01064237856142e-05	0.00157791	ESR1	pseudobulk	up
OSBPL5	5.55154	0.718381	56.0193	0.000252754	0.00551403	OSBPL5	pseudobulk	up
C3orf84	5.542	0.974907	115.482	2.29013353636374e-05	0.00203032	C3orf84	pseudobulk	up
CD109	5.49864	2.59204	126.342	3.07927482133923e-05	0.00220251	CD109	pseudobulk	up
ETNK2	5.47604	-1.87412	8.94511	0.0381999	0.0816424	ETNK2	pseudobulk	up
CAPN12	5.44315	-0.0652679	34.3707	0.000797976	0.00925652	CAPN12	pseudobulk	up
FER1L6	5.4258	1.0198	121.515	2.85458403542333e-05	0.0021367	FER1L6	pseudobulk	up
ITGA2	5.40051	-1.37832	9.0403	0.0375887	0.0808074	ITGA2	pseudobulk	up
RTN4R	5.39827	1.29155	132.015	4.31468403386597e-05	0.00248047	RTN4R	pseudobulk	up
LRRC75B	5.38538	1.80642	136.617	6.02287407465563e-05	0.00282728	LRRC75B	pseudobulk	up
RGS13	5.36477	0.192349	41.9991	0.000358806	0.00663411	RGS13	pseudobulk	up
MANSC4	5.3545	0.895898	97.4398	3.63674765462667e-05	0.00230386	MANSC4	pseudobulk	up
NEURL3	5.34032	1.37534	163.715	3.16000076898737e-05	0.00220251	NEURL3	pseudobulk	up
IFI6	5.3388	7.37397	297.249	9.059687055989e-06	0.00155564	IFI6	pseudobulk	up
LILRA6	5.32452	2.14505	58.0272	0.000453787	0.00719617	LILRA6	pseudobulk	up
GNLY	5.3208	-1.51034	8.42747	0.0417973	0.0871472	GNLY	pseudobulk	up
UBXN10	5.31462	-1.38193	8.55727	0.0408493	0.0856496	UBXN10	pseudobulk	up
ALK	5.30027	0.858533	110.885	3.81615553127241e-05	0.0023335	ALK	pseudobulk	up
SLC47A1	5.29592	5.21866	194.034	2.6781493274237e-05	0.00209103	SLC47A1	pseudobulk	up
CXCL10	5.27005	5.05488	34.3567	0.00182705	0.0139687	CXCL10	pseudobulk	up
ODF3B	5.2694	6.55033	284.219	1.01566484672962e-05	0.00157791	ODF3B	pseudobulk	up
ITGA4	5.26562	6.27027	802.111	7.12284196668656e-07	0.00130949	ITGA4	pseudobulk	up
PRSS21	5.26182	-0.593324	23.9597	0.00289654	0.017508	PRSS21	pseudobulk	up
CFAP46	5.23001	-1.7429	7.73436	0.0474602	0.0951245	CFAP46	pseudobulk	up
TRIM63	5.22682	0.102672	20.3914	0.00455483	0.0220722	TRIM63	pseudobulk	up
L3MBTL4	5.22294	4.61533	418.819	3.78029739724314e-06	0.00130949	L3MBTL4	pseudobulk	up
KRT36	5.20332	0.12951	34.0799	0.000706202	0.00875496	KRT36	pseudobulk	up
ANXA1	5.19989	3.94672	484.714	2.61887469786225e-06	0.00130949	ANXA1	pseudobulk	up
ZNF835	5.19526	0.437852	46.5638	0.000444544	0.00719617	ZNF835	pseudobulk	up
IFI44	5.1677	6.88403	50.7984	0.000731726	0.00889937	IFI44	pseudobulk	up
LY6K	5.16578	-1.70772	6.99125	0.0549009	0.106032	LY6K	pseudobulk	up
CCDC78	5.16024	2.37952	222.409	1.99058966248687e-05	0.00195984	CCDC78	pseudobulk	up
LYZ	5.15288	7.6795	519.581	2.17254282396299e-06	0.00130949	LYZ	pseudobulk	up
ZNF736	5.14488	1.95586	62.3645	0.000443789	0.00719617	ZNF736	pseudobulk	up
NOD2	5.14358	2.20802	87.17	0.000202615	0.00494413	NOD2	pseudobulk	up
ZBED6CL	5.14267	1.09394	60.2794	0.000341543	0.00654498	ZBED6CL	pseudobulk	up
SARDH	5.11729	0.717914	79.7673	0.000117186	0.00393129	SARDH	pseudobulk	up
ZFP3	5.0957	3.2374	72.8285	0.000310082	0.006234	ZFP3	pseudobulk	up
MX2	5.09017	4.45712	86.5328	0.000201505	0.00494294	MX2	pseudobulk	up
SLAMF8	5.08902	3.89226	86.2999	0.000203428	0.00494413	SLAMF8	pseudobulk	up
HDC	5.07387	-0.776321	17.6678	0.00767885	0.0295951	HDC	pseudobulk	up
IFIT3	5.06907	5.3102	100.073	0.00014061	0.00418138	IFIT3	pseudobulk	up
GMPR	5.06823	2.25678	117.535	9.68782117775897e-05	0.00357449	GMPR	pseudobulk	up
LAMA1	5.06649	-1.71157	6.6169	0.0593261	0.11235	LAMA1	pseudobulk	up
EMP1	5.06615	1.87682	82.5439	0.000181844	0.00469311	EMP1	pseudobulk	up
GDF15	5.0531	0.740001	61.5365	0.000144182	0.00423577	GDF15	pseudobulk	up
FAM174B	5.03027	2.1497	55.659	0.000579929	0.00796118	FAM174B	pseudobulk	up
SLC6A12	5.0281	1.86246	115.204	9.86449512618559e-05	0.00358584	SLC6A12	pseudobulk	up
FCAR	5.01013	1.21909	52.5741	0.000487354	0.00745699	FCAR	pseudobulk	up
CD9	5.00849	6.49808	134.373	6.74665787162831e-05	0.00296444	CD9	pseudobulk	up
NLRP12	5.00663	0.983953	63.7394	0.000350493	0.00658446	NLRP12	pseudobulk	up
CSTA	5.00366	2.08392	107.303	0.000115525	0.00388558	CSTA	pseudobulk	up
EMILIN2	4.96404	5.68535	121.339	8.70804691997105e-05	0.00336772	EMILIN2	pseudobulk	up
FAM24B	4.96158	1.66538	52.2663	0.000672697	0.00854554	FAM24B	pseudobulk	up
ACACB	4.95698	1.5935	116.405	8.94306974313553e-05	0.00343256	ACACB	pseudobulk	up
VIM	4.95115	8.83863	934.993	4.80007743972608e-07	0.00130949	VIM	pseudobulk	up
CXADR	4.94859	-0.97524	6.97555	0.0550764	0.106276	CXADR	pseudobulk	up
KCTD15	4.94688	1.07849	83.4883	0.000124547	0.004034	KCTD15	pseudobulk	up
PTPRM	4.9458	2.33269	94.3822	0.000162901	0.0044755	PTPRM	pseudobulk	up
AMIGO2	4.94132	2.43599	129.767	7.62208350111479e-05	0.0031378	AMIGO2	pseudobulk	up
TMEM26	4.93701	1.83627	142.172	5.80646432713054e-05	0.00278582	TMEM26	pseudobulk	up
BEX3	4.93331	3.42434	132.321	7.22362315992026e-05	0.00305075	BEX3	pseudobulk	up
CCL28	4.92811	0.337129	81.0885	9.22405951491708e-05	0.0034911	CCL28	pseudobulk	up
LRRC3	4.91379	-0.511839	31.1262	0.000885685	0.00982128	LRRC3	pseudobulk	up
TYMP	4.87365	7.66749	418.69	3.77688318078838e-06	0.00130949	TYMP	pseudobulk	up
MSR1	4.86582	7.00084	241.403	1.53829447013279e-05	0.00180854	MSR1	pseudobulk	up
APOL3	4.86554	2.19929	81.9588	0.000237529	0.0053237	APOL3	pseudobulk	up
CHDH	4.84855	-0.595178	27.8527	0.00120382	0.0113922	CHDH	pseudobulk	up
PRKACB	4.84524	3.67098	434.452	3.45132032430781e-06	0.00130949	PRKACB	pseudobulk	up
KIAA1671	4.84429	-1.76104	5.79359	0.0711482	0.127893	KIAA1671	pseudobulk	up
FGR	4.83998	4.73578	148.92	5.21675464638241e-05	0.00274588	FGR	pseudobulk	up
CD48	4.82844	3.66622	358.436	5.64483901172477e-06	0.00152789	CD48	pseudobulk	up
PKD2L1	4.82738	3.29751	290.627	9.66179885214501e-06	0.00157423	PKD2L1	pseudobulk	up
LGALS3	4.82393	6.81821	200.703	2.45660458512828e-05	0.0020683	LGALS3	pseudobulk	up
OAS2	4.81495	5.93868	56.1426	0.000576198	0.00796118	OAS2	pseudobulk	up
ZNF662	4.80117	-0.550842	21.6201	0.00277185	0.0172169	ZNF662	pseudobulk	up
JHY	4.79768	2.14921	174.199	3.67853879082965e-05	0.00230433	JHY	pseudobulk	up
RASGRF1	4.79503	0.28459	35.7458	0.000920113	0.00993758	RASGRF1	pseudobulk	up
ANXA2	4.77423	5.76881	686.441	1.06307433603103e-06	0.00130949	ANXA2	pseudobulk	up
ASRGL1	4.77292	3.05399	329.63	7.06256819868593e-06	0.00153886	ASRGL1	pseudobulk	up
CFD	4.75696	5.11851	175.172	3.46676659480335e-05	0.00225081	CFD	pseudobulk	up
VAX2	4.7329	-1.78816	5.06934	0.0847267	0.145687	VAX2	pseudobulk	up
DCSTAMP	4.72742	0.279499	70.2331	0.000135748	0.00413626	DCSTAMP	pseudobulk	up
HMX3	4.71772	0.488255	26.9007	0.00133542	0.0120521	HMX3	pseudobulk	up
DUSP4	4.71271	0.399904	21.1433	0.00299276	0.0178011	DUSP4	pseudobulk	up
TNFAIP8L3	4.6981	0.441295	43.6739	0.000776201	0.00913687	TNFAIP8L3	pseudobulk	up
VCAM1	4.68399	-1.31316	21.7282	0.00731813	0.0288161	VCAM1	pseudobulk	up
DDX43	4.6775	-0.370752	18.7394	0.00406519	0.0207879	DDX43	pseudobulk	up
TRIM14	4.67643	5.94948	630.742	1.32097569795424e-06	0.00130949	TRIM14	pseudobulk	up
CCDC152	4.67105	-0.0374468	34.8464	0.00100151	0.0103762	CCDC152	pseudobulk	up
IRF4	4.66994	0.230044	66.9271	0.000159456	0.00442745	IRF4	pseudobulk	up
ZDHHC18	4.66157	3.06312	232.041	1.71456780291484e-05	0.00184268	ZDHHC18	pseudobulk	up
ANO5	4.64934	-0.244947	17.6241	0.00483561	0.0227404	ANO5	pseudobulk	up
HOXB4	4.64411	1.14354	64.759	0.000132905	0.00412109	HOXB4	pseudobulk	up
PPIC	4.63705	1.17169	41.7216	0.000540368	0.00780741	PPIC	pseudobulk	up
IL32	4.62886	-0.542308	26.8551	0.00141941	0.012353	IL32	pseudobulk	up
RDH12	4.62256	-0.930061	19.8579	0.00325462	0.0185714	RDH12	pseudobulk	up
PTPN22	4.61641	2.87781	216.1	2.07322274631959e-05	0.00198253	PTPN22	pseudobulk	up
HOXB3	4.60317	-0.779801	12.7808	0.0145916	0.0435646	HOXB3	pseudobulk	up
ZNF185	4.60216	1.76904	134.494	6.94950510696379e-05	0.00301299	ZNF185	pseudobulk	up
HOXA9	4.60118	-1.74246	4.59081	0.0959514	0.159756	HOXA9	pseudobulk	up
STMN3	4.60118	-0.402112	5.43981	0.0773378	0.136186	STMN3	pseudobulk	up
RAB40A	4.60118	-1.92261	4.48983	0.0986051	0.163237	RAB40A	pseudobulk	up
SLC38A5	4.59909	-0.249017	54.0375	0.000226882	0.00524967	SLC38A5	pseudobulk	up
CCR6	4.59831	-1.47401	4.88622	0.0887767	0.150733	CCR6	pseudobulk	up
PYHIN1	4.58649	-0.0325978	55.9526	0.000200561	0.00494294	PYHIN1	pseudobulk	up
CLEC5A	4.58639	4.75422	182.711	3.121932076502e-05	0.00220251	CLEC5A	pseudobulk	up
ZP3	4.58309	-0.0311284	29.2492	0.00153153	0.0128127	ZP3	pseudobulk	up
CSRP2	4.55757	1.18395	69.3043	0.000321009	0.00632805	CSRP2	pseudobulk	up
LRRC61	4.55634	-0.0466222	24.3134	0.00220941	0.0152853	LRRC61	pseudobulk	up
ISG15	4.55448	5.90951	152.252	4.93164949651683e-05	0.00265826	ISG15	pseudobulk	up
IFIT1	4.5501	4.4092	146.703	5.41710543438687e-05	0.00274588	IFIT1	pseudobulk	up
B3GNT7	4.54644	1.27638	112.902	9.72369801060758e-05	0.00357449	B3GNT7	pseudobulk	up
SNTA1	4.54434	0.079357	60.1727	0.000210053	0.00500219	SNTA1	pseudobulk	up
RARRES1	4.53956	1.03606	103.289	6.3089017619554e-05	0.00287956	RARRES1	pseudobulk	up
DOCK1	4.53656	4.01494	455.461	3.05069360003664e-06	0.00130949	DOCK1	pseudobulk	up
CXCL3	4.53133	-0.488282	16.8327	0.00572348	0.0250424	CXCL3	pseudobulk	up
TRIM47	4.51961	3.49467	180.582	3.21597295661117e-05	0.00222055	TRIM47	pseudobulk	up
KANK1	4.51513	1.94269	157.146	4.72677172678169e-05	0.00260272	KANK1	pseudobulk	up
GBP3	4.49714	2.1855	118.02	9.567508704094e-05	0.00356731	GBP3	pseudobulk	up
CIDEB	4.48836	4.1929	119.504	9.05386442235005e-05	0.00345476	CIDEB	pseudobulk	up
NXF3	4.48431	0.619572	60.347	0.000192591	0.00486167	NXF3	pseudobulk	up
STAP1	4.48135	1.68528	100.504	0.000144348	0.00423577	STAP1	pseudobulk	up
IFNLR1	4.47178	1.73134	143.704	5.79546036377204e-05	0.00278582	IFNLR1	pseudobulk	up
TSKU	4.44917	2.5221	97.7476	0.000151339	0.00430278	TSKU	pseudobulk	up
OR2AE1	4.44432	-1.79688	4.39672	0.101151	0.166544	OR2AE1	pseudobulk	up
CXCL11	4.43891	0.0360667	31.9906	0.00119425	0.0113428	CXCL11	pseudobulk	up
USP18	4.42675	3.51174	65.146	0.00040336	0.0069848	USP18	pseudobulk	up
JAML	4.41568	2.31712	69.7737	0.000347594	0.00658446	JAML	pseudobulk	up
LSP1	4.40556	5.56766	141.337	5.94450500068944e-05	0.00280913	LSP1	pseudobulk	up
B3GNT8	4.40513	2.3254	230.008	1.77728273964832e-05	0.00185548	B3GNT8	pseudobulk	up
PNPLA3	4.37807	2.32592	206.386	2.36524760152621e-05	0.00203502	PNPLA3	pseudobulk	up
APOBEC3A	4.3729	-1.26167	19.7395	0.00630573	0.0265204	APOBEC3A	pseudobulk	up
HSPA6	4.37137	6.61744	672.325	1.12108644173094e-06	0.00130949	HSPA6	pseudobulk	up
PSAT1	4.36468	-1.02044	19.332	0.003296	0.0186795	PSAT1	pseudobulk	up
VNN1	4.35126	1.70519	101.691	0.000139533	0.00417638	VNN1	pseudobulk	up
SIGLEC1	4.34677	6.96	168.014	3.84848966811499e-05	0.0023335	SIGLEC1	pseudobulk	up
SH3D21	4.33842	4.21581	196.168	2.6051650354684e-05	0.00209103	SH3D21	pseudobulk	up
IFIT2	4.33584	4.98128	134.655	6.71203478019536e-05	0.00296444	IFIT2	pseudobulk	up
CCDC36	4.30387	0.322459	58.1071	0.000377009	0.00681436	CCDC36	pseudobulk	up
PAPSS2	4.30377	2.17274	148.089	5.50447040749577e-05	0.00274588	PAPSS2	pseudobulk	up
AKR1E2	4.29791	2.80222	149.8	5.19632369939766e-05	0.00274588	AKR1E2	pseudobulk	up
TMEM71	4.29512	2.38351	136.486	6.74585753878719e-05	0.00296444	TMEM71	pseudobulk	up
CDC42EP3	4.29354	2.67122	176.902	3.42702625914897e-05	0.00223958	CDC42EP3	pseudobulk	up
STEAP4	4.29228	-1.83214	3.52257	0.130806	0.202373	STEAP4	pseudobulk	up
PLA2G2C	4.27725	-1.56544	4.09193	0.110218	0.177355	PLA2G2C	pseudobulk	up
SLC22A16	4.27725	-1.39156	4.18095	0.107447	0.174033	SLC22A16	pseudobulk	up
ADTRP	4.27486	1.85211	44.9002	0.000680483	0.0085926	ADTRP	pseudobulk	up
VWF	4.27396	0.805659	90.958	0.000164842	0.00449099	VWF	pseudobulk	up
MX1	4.27137	5.75955	68.9939	0.00035026	0.00658446	MX1	pseudobulk	up
SDC4	4.25867	1.73275	118.508	8.31117088579506e-05	0.00327329	SDC4	pseudobulk	up
RASGEF1B	4.25426	3.66527	221.944	1.90676288176244e-05	0.00193828	RASGEF1B	pseudobulk	up
CD74	4.24917	10.9728	90.8602	0.000178453	0.00465763	CD74	pseudobulk	up
CDKL1	4.24734	-0.400242	22.0292	0.00313558	0.0182973	CDKL1	pseudobulk	up
PDE8B	4.2466	-0.930301	18.405	0.00379929	0.0200245	PDE8B	pseudobulk	up
FLNB	4.22126	1.25161	99.1676	0.000140661	0.00418138	FLNB	pseudobulk	up
ADGRE2	4.218	5.32155	430.765	3.51237509465362e-06	0.00130949	ADGRE2	pseudobulk	up
ME1	4.21728	4.2833	417.036	3.81866179125852e-06	0.00130949	ME1	pseudobulk	up
PARP15	4.19267	3.54956	290.157	9.65389449202551e-06	0.00157423	PARP15	pseudobulk	up
SLAMF6	4.19238	0.19081	33.2322	0.0013715	0.0122064	SLAMF6	pseudobulk	up
OAS3	4.19051	5.90462	91.2913	0.000176391	0.00465032	OAS3	pseudobulk	up
S100A4	4.18973	6.38025	173.257	3.56176646852553e-05	0.00228721	S100A4	pseudobulk	up
PTGER4	4.17042	4.09592	420.448	3.74016224736794e-06	0.00130949	PTGER4	pseudobulk	up
APOC1	4.17017	6.51328	342.271	6.32230145747384e-06	0.00152789	APOC1	pseudobulk	up
TMEM140	4.16392	4.07939	406.36	4.08210504893717e-06	0.00130949	TMEM140	pseudobulk	up
CELSR1	4.16289	1.18543	78.6263	0.000251794	0.00551403	CELSR1	pseudobulk	up
FBP1	4.16181	3.67634	312	8.01720525736566e-06	0.00154771	FBP1	pseudobulk	up
RAB17	4.15928	1.38936	79.3616	0.000237963	0.0053237	RAB17	pseudobulk	up
HSBP1L1	4.1568	2.16728	179.549	3.34754116326372e-05	0.00223958	HSBP1L1	pseudobulk	up
NUPR1	4.15638	8.86849	388.625	4.5699056982119e-06	0.00135539	NUPR1	pseudobulk	up
DGKG	4.15435	1.81026	107.084	0.000122653	0.0039972	DGKG	pseudobulk	up
ITGAD	4.14661	3.60232	37.02	0.00153896	0.0128372	ITGAD	pseudobulk	up
CES3	4.14253	-0.29062	38.0426	0.000621833	0.00828364	CES3	pseudobulk	up
GBP4	4.13397	1.58807	29.1341	0.0027039	0.0169889	GBP4	pseudobulk	up
SLFN12L	4.11977	-1.27779	17.1576	0.00669957	0.0273644	SLFN12L	pseudobulk	up
CCL18	4.11243	0.980506	56.2819	0.000187471	0.00476678	CCL18	pseudobulk	up
GLB1L	4.10539	2.19171	178.22	3.39611327902853e-05	0.00223958	GLB1L	pseudobulk	up
CD44	4.10354	5.71674	102.032	0.000133978	0.00413338	CD44	pseudobulk	up
ADGRE3	4.10222	0.816017	20.8544	0.00356903	0.0194066	ADGRE3	pseudobulk	up
PLA2R1	4.09765	-1.35116	3.69336	0.124056	0.194443	PLA2R1	pseudobulk	up
NKAPL	4.09717	0.0968586	39.6461	0.000833434	0.00949068	NKAPL	pseudobulk	up
SLC6A16	4.08634	0.768893	64.2456	0.000368812	0.00672006	SLC6A16	pseudobulk	up
TBC1D2	4.08244	4.41555	432.208	3.48357858587372e-06	0.00130949	TBC1D2	pseudobulk	up
ADCY3	4.08139	5.1633	485.441	2.58674272098673e-06	0.00130949	ADCY3	pseudobulk	up
KRBOX1	4.07944	-0.484052	19.4023	0.00460425	0.022197	KRBOX1	pseudobulk	up
SLC22A1	4.07685	1.07473	87.1148	0.000201473	0.00494294	SLC22A1	pseudobulk	up
PNMA3	4.07282	-0.352534	40.4669	0.000665687	0.00850853	PNMA3	pseudobulk	up
TNFSF18	4.04959	-0.133089	40.1622	0.000625664	0.00828364	TNFSF18	pseudobulk	up
ANKRD22	4.04878	2.57918	31.2482	0.00227512	0.0155773	ANKRD22	pseudobulk	up
B3GALNT1	4.04576	3.44913	258.437	1.29563535265555e-05	0.0016908	B3GALNT1	pseudobulk	up
TGFA	4.03972	0.697451	66.3733	0.00032631	0.00639392	TGFA	pseudobulk	up
EVA1C	4.03807	0.0929778	42.0339	0.000800472	0.00927723	EVA1C	pseudobulk	up
NCR3LG1	4.00598	0.478832	50.7156	0.000534905	0.00778206	NCR3LG1	pseudobulk	up
VEGFD	4.00487	-0.960196	14.4517	0.00693147	0.0279098	VEGFD	pseudobulk	up
IFITM10	3.99975	6.0182	499.719	2.40073736301102e-06	0.00130949	IFITM10	pseudobulk	up
MBOAT1	3.99668	3.13584	110.514	0.000110089	0.00381077	MBOAT1	pseudobulk	up
SLCO3A1	3.99355	1.38077	102.583	0.000129195	0.00410218	SLCO3A1	pseudobulk	up
FN1	3.97676	-0.365675	16.2978	0.00620639	0.0262468	FN1	pseudobulk	up
STBD1	3.96429	-0.0242027	47.3774	0.000613912	0.00822542	STBD1	pseudobulk	up
HOXB7	3.92576	1.66051	62.6954	0.000452536	0.00719617	HOXB7	pseudobulk	up
HOXC4	3.92469	-0.050211	31.3519	0.00139274	0.0122714	HOXC4	pseudobulk	up
C9orf64	3.92249	3.4045	78.9413	0.000252433	0.00551403	C9orf64	pseudobulk	up
GPX3	3.91746	4.20246	327.765	7.07556912297959e-06	0.00153886	GPX3	pseudobulk	up
PLAU	3.91602	5.76026	469.161	2.82226937049802e-06	0.00130949	PLAU	pseudobulk	up
TMEM114	3.89238	-1.84532	2.9917	0.155776	0.232355	TMEM114	pseudobulk	up
CLECL1	3.88237	3.83465	17.7464	0.00778673	0.0298667	CLECL1	pseudobulk	up
HELZ2	3.86563	2.89116	32.3464	0.00209964	0.0148856	HELZ2	pseudobulk	up
RSAD2	3.86444	3.62773	27.4149	0.00304534	0.0179955	RSAD2	pseudobulk	up
TOP1MT	3.86396	3.16138	221.595	1.91599972633943e-05	0.00193828	TOP1MT	pseudobulk	up
SASH1	3.85782	3.45858	53.0657	0.000659825	0.00847511	SASH1	pseudobulk	up
P2RY2	3.84901	-1.02926	12.6272	0.00959898	0.033768	P2RY2	pseudobulk	up
LRFN4	3.8441	3.48419	82.7842	0.000224589	0.00520584	LRFN4	pseudobulk	up
ARHGAP10	3.83757	3.79481	171.229	3.67155329614791e-05	0.00230433	ARHGAP10	pseudobulk	up
IFITM3	3.82925	3.74397	147.719	5.32415338541995e-05	0.00274588	IFITM3	pseudobulk	up
NQO1	3.82276	1.5021	70.7966	0.00032083	0.00632805	NQO1	pseudobulk	up
GPRC5B	3.81653	1.41563	26.3991	0.00334807	0.0187718	GPRC5B	pseudobulk	up
ZNF215	3.81244	-0.845081	6.79884	0.0443502	0.0907177	ZNF215	pseudobulk	up
GPR157	3.81005	1.18535	91.4578	0.000181524	0.00469311	GPR157	pseudobulk	up
PAPLN	3.79955	2.69174	36.3522	0.00160735	0.0130619	PAPLN	pseudobulk	up
CDC42EP1	3.79886	0.0785465	6.12642	0.0565131	0.10836	CDC42EP1	pseudobulk	up
SIGLEC15	3.79836	0.59623	20.4272	0.00519768	0.0238321	SIGLEC15	pseudobulk	up
CD80	3.78723	4.25162	30.8771	0.00233026	0.0157157	CD80	pseudobulk	up
OLFML2A	3.78154	1.58863	99.68	0.000144763	0.00423577	OLFML2A	pseudobulk	up
IL4I1	3.77873	5.51107	437.658	3.37208097391859e-06	0.00130949	IL4I1	pseudobulk	up
ENPP1	3.77506	1.44628	46.7454	0.000906857	0.00988679	ENPP1	pseudobulk	up
RIC3	3.76881	0.729924	39.1	0.00134257	0.0120877	RIC3	pseudobulk	up
NLRC5	3.74892	5.00644	105.67	0.000122826	0.0039972	NLRC5	pseudobulk	up
CLDN1	3.74879	3.60238	174.664	3.49392354186e-05	0.00225721	CLDN1	pseudobulk	up
ISG20	3.74878	3.69985	95.397	0.000158335	0.00440956	ISG20	pseudobulk	up
GCHFR	3.74571	5.12378	117.021	9.52974092438086e-05	0.00356341	GCHFR	pseudobulk	up
CIITA	3.74342	7.71717	38.4598	0.00140779	0.0123183	CIITA	pseudobulk	up
GOLGA8B	3.73466	0.184229	48.2792	0.000656532	0.00846517	GOLGA8B	pseudobulk	up
DDR2	3.72403	-1.40851	12.531	0.0103579	0.0352312	DDR2	pseudobulk	up
SULT1C2	3.71709	1.57201	36.5207	0.00160885	0.013065	SULT1C2	pseudobulk	up
MAATS1	3.71707	-1.29479	10.5011	0.0146946	0.043742	MAATS1	pseudobulk	up
BCL2A1	3.7156	3.9217	69.1931	0.000347921	0.00658446	BCL2A1	pseudobulk	up
ENPP7	3.71543	-0.210529	15.5584	0.00823786	0.0309182	ENPP7	pseudobulk	up
ACSM6	3.71487	-0.860853	11.6427	0.0252457	0.0616151	ACSM6	pseudobulk	up
DCDC2	3.71004	-0.919291	9.72216	0.0180203	0.0498307	DCDC2	pseudobulk	up
TAF4B	3.6984	0.521712	57.6078	0.000511678	0.00758795	TAF4B	pseudobulk	up
PSMB9	3.69632	3.97822	178.132	3.32217807218842e-05	0.00223958	PSMB9	pseudobulk	up
BST1	3.69117	1.52223	108.156	0.000119632	0.00399284	BST1	pseudobulk	up
ADGRA3	3.67901	-1.15408	13.0478	0.0111054	0.0366449	ADGRA3	pseudobulk	up
VSTM1	3.67082	-1.85977	9.55891	0.0303572	0.0694683	VSTM1	pseudobulk	up
AKAP5	3.66546	-1.67314	8.78487	0.022096	0.056573	AKAP5	pseudobulk	up
SLC38A6	3.6536	5.53053	423.683	3.66419832509548e-06	0.00130949	SLC38A6	pseudobulk	up
LGALS1	3.65043	8.19917	93.9155	0.000164465	0.0044901	LGALS1	pseudobulk	up
GAPT	3.63959	2.60013	131.397	7.152252835256e-05	0.00304029	GAPT	pseudobulk	up
BTN2A2	3.63594	3.72699	109.448	0.000112602	0.00384262	BTN2A2	pseudobulk	up
PCGF2	3.63034	1.73191	95.4095	0.000162632	0.0044755	PCGF2	pseudobulk	up
SULT1A1	3.62262	1.41206	61.589	0.00047344	0.00733775	SULT1A1	pseudobulk	up
TGFBI	3.62209	7.17487	513.325	2.24083076752731e-06	0.00130949	TGFBI	pseudobulk	up
TGFB2	3.62067	1.46349	76.8275	0.000276081	0.00580608	TGFB2	pseudobulk	up
FXYD6	3.6008	3.58529	151.438	5.00208914585127e-05	0.00266438	FXYD6	pseudobulk	up
SYNDIG1L	3.59518	-0.777012	25.9979	0.00211836	0.0149511	SYNDIG1L	pseudobulk	up
SLC45A3	3.59442	0.033456	36.9235	0.00138163	0.0122336	SLC45A3	pseudobulk	up
MAP3K6	3.59246	0.557803	34.8617	0.00175662	0.0136859	MAP3K6	pseudobulk	up
ACVRL1	3.58607	2.10557	135.439	6.68569721908856e-05	0.00296444	ACVRL1	pseudobulk	up
MCF2L2	3.5856	0.12572	34.0444	0.00146001	0.0125384	MCF2L2	pseudobulk	up
CIART	3.5838	-0.0778857	23.7787	0.00344918	0.0191084	CIART	pseudobulk	up
COL9A3	3.58306	-0.928027	12.3337	0.0139121	0.0422315	COL9A3	pseudobulk	up
MOK	3.58273	0.998164	29.4521	0.00263875	0.0167733	MOK	pseudobulk	up
ERAP2	3.58059	1.79547	97.7732	0.000151289	0.00430278	ERAP2	pseudobulk	up
HAGHL	3.57899	5.39513	211.974	2.13927514570998e-05	0.00198253	HAGHL	pseudobulk	up
SMIM10	3.57094	-1.44377	8.69908	0.0223524	0.0570281	SMIM10	pseudobulk	up
CLIC2	3.53058	1.73793	121.812	8.79021041043937e-05	0.00338384	CLIC2	pseudobulk	up
TLCD5	3.53056	-1.437	10.165	0.0160632	0.0462089	TLCD5	pseudobulk	up
FLVCR2	3.52644	2.05562	70.609	0.000333684	0.0064862	FLVCR2	pseudobulk	up
FOXA1	3.52537	-0.44722	5.99834	0.0520774	0.102136	FOXA1	pseudobulk	up
TNFSF13B	3.52531	5.47928	206.737	2.2791781435578e-05	0.00203032	TNFSF13B	pseudobulk	up
AMDHD1	3.51351	1.27616	21.8958	0.00485476	0.0227976	AMDHD1	pseudobulk	up
OASL	3.51086	2.75827	35.4994	0.00169609	0.0133777	OASL	pseudobulk	up
SCD	3.50941	4.47343	243.478	1.50572134864214e-05	0.00180272	SCD	pseudobulk	up
HPN	3.50793	1.34642	102.15	0.000137208	0.00415445	HPN	pseudobulk	up
TSPAN4	3.50565	4.73983	348.023	6.05980757962206e-06	0.00152789	TSPAN4	pseudobulk	up
KIAA1522	3.50453	2.69648	202.89	2.39610163706856e-05	0.00204373	KIAA1522	pseudobulk	up
ZNF682	3.50376	0.371552	45.3192	0.000833015	0.00949068	ZNF682	pseudobulk	up
TNFAIP2	3.50113	7.72277	279.343	1.06124788086446e-05	0.00159187	TNFAIP2	pseudobulk	up
ACSM3	3.49606	-0.325971	25.6775	0.00266958	0.0168878	ACSM3	pseudobulk	up
TREM1	3.49588	0.97142	39.8283	0.00113704	0.0111399	TREM1	pseudobulk	up
TOM1L1	3.49549	1.05583	61.9011	0.000467725	0.00730995	TOM1L1	pseudobulk	up
SYNE3	3.4953	3.20418	34.61	0.00179748	0.0138498	SYNE3	pseudobulk	up
LILRA2	3.49103	4.44893	323.354	7.31104303507437e-06	0.00153886	LILRA2	pseudobulk	up
TCEAL9	3.47821	2.47427	69.8071	0.000341423	0.00654498	TCEAL9	pseudobulk	up
SSC4D	3.47468	0.450543	60.5491	0.000488301	0.00746175	SSC4D	pseudobulk	up
SERPING1	3.47321	3.36203	31.735	0.00219027	0.0152029	SERPING1	pseudobulk	up
WHRN	3.47015	1.05257	53.2242	0.00062522	0.00828364	WHRN	pseudobulk	up
RTP4	3.4651	2.30808	146.38	5.48229583983584e-05	0.00274588	RTP4	pseudobulk	up
GRIP2	3.46026	1.41368	54.0021	0.000648456	0.00843905	GRIP2	pseudobulk	up
DENND2D	3.45482	4.80096	157.462	4.53161483889068e-05	0.00253739	DENND2D	pseudobulk	up
TMEM176A	3.44466	3.9369	294.433	9.28659663392366e-06	0.0015739	TMEM176A	pseudobulk	up
PITX2	3.43988	2.58729	8.59175	0.0289718	0.0674423	PITX2	pseudobulk	up
MGST1	3.43875	-0.721051	17.1901	0.00519736	0.0238321	MGST1	pseudobulk	up
HGF	3.43719	3.70038	300.292	8.83119237288725e-06	0.00154771	HGF	pseudobulk	up
ENDOD1	3.42704	0.0742557	30.7502	0.00213278	0.0150042	ENDOD1	pseudobulk	up
HAL	3.40872	-0.281083	16.7797	0.00819853	0.0308455	HAL	pseudobulk	up
PDCD1	3.39652	-0.78383	12.1219	0.0129459	0.0403881	PDCD1	pseudobulk	up
CCDC9B	3.39592	5.26592	198.246	2.53439349591947e-05	0.00208243	CCDC9B	pseudobulk	up
ENPP4	3.39566	2.09795	34.0108	0.00187433	0.0141838	ENPP4	pseudobulk	up
TAP1	3.39134	4.21908	90.1497	0.000181971	0.00469311	TAP1	pseudobulk	up
MYO1D	3.39052	3.96643	17.0846	0.00842504	0.0312704	MYO1D	pseudobulk	up
STON1	3.3902	-0.330625	22.3393	0.00358165	0.0194509	STON1	pseudobulk	up
RASGRP3	3.38861	4.99772	69.3433	0.000345982	0.00658446	RASGRP3	pseudobulk	up
NHS	3.38222	0.00351439	33.4416	0.001681	0.0133252	NHS	pseudobulk	up
ANK2	3.38128	0.608546	56.5853	0.000575668	0.00796118	ANK2	pseudobulk	up
CMPK2	3.37908	6.40143	102.732	0.000131717	0.00411749	CMPK2	pseudobulk	up
SLFN5	3.3781	4.31186	233.382	1.6763602483851e-05	0.00184268	SLFN5	pseudobulk	up
CXCR4	3.36974	5.64551	53.4397	0.000648413	0.00843905	CXCR4	pseudobulk	up
PSCA	3.36547	-1.27693	8.2756	0.0429486	0.0886133	PSCA	pseudobulk	up
CEP170B	3.36221	0.530062	39.4264	0.001207	0.0114081	CEP170B	pseudobulk	up
NEGR1	3.36189	-1.40281	2.01957	0.225508	0.31112	NEGR1	pseudobulk	up
FCER1A	3.36189	-1.46544	2.00396	0.227004	0.312833	FCER1A	pseudobulk	up
PLBD1	3.35311	3.91699	82.0807	0.000229208	0.00527542	PLBD1	pseudobulk	up
DAPK1	3.33876	5.86252	13.6416	0.0132637	0.0409585	DAPK1	pseudobulk	up
SAMD9L	3.33341	5.43068	56.4501	0.000568677	0.00794565	SAMD9L	pseudobulk	up
KCNN4	3.33169	2.20134	56.3932	0.000571812	0.00796118	KCNN4	pseudobulk	up
GSDME	3.3144	5.23102	33.8118	0.00189467	0.0142428	GSDME	pseudobulk	up
COL24A1	3.31222	-0.123922	9.26641	0.0225284	0.0573092	COL24A1	pseudobulk	up
ENPP3	3.30496	0.331222	18.4044	0.00731201	0.0288161	ENPP3	pseudobulk	up
EXOC3L4	3.30485	-1.14294	8.46291	0.0254846	0.0619882	EXOC3L4	pseudobulk	up
CDCP1	3.29283	3.53104	230.955	1.72215287919603e-05	0.00184268	CDCP1	pseudobulk	up
ZNF366	3.29142	0.970972	54.5486	0.000633354	0.00834033	ZNF366	pseudobulk	up
RALGDS	3.28788	4.61188	285.421	1.00478316810893e-05	0.00157791	RALGDS	pseudobulk	up
FUT7	3.28757	0.23993	21.4436	0.00461092	0.022197	FUT7	pseudobulk	up
NMRK2	3.28011	0.805814	21.6667	0.00459739	0.0221878	NMRK2	pseudobulk	up
CD14	3.27992	8.0298	343.425	6.26792441134815e-06	0.00152789	CD14	pseudobulk	up
ATP6V0D2	3.27871	-0.877505	4.73148	0.0776454	0.136526	ATP6V0D2	pseudobulk	up
FAM83G	3.27127	-0.911536	11.2231	0.0151063	0.0444004	FAM83G	pseudobulk	up
CCSER1	3.27079	1.1622	55.9089	0.000596447	0.00809463	CCSER1	pseudobulk	up
ZNF677	3.25628	0.69186	45.008	0.000995491	0.0103466	ZNF677	pseudobulk	up
CMBL	3.2516	0.310582	39.7858	0.00121128	0.0114185	CMBL	pseudobulk	up
OR3A2	3.24619	-2.05744	2.62572	0.172589	0.251737	OR3A2	pseudobulk	up
CLEC4F	3.24023	-0.0850141	14.7684	0.00958595	0.0337602	CLEC4F	pseudobulk	up
SAMD4A	3.23796	5.64714	299.472	8.88920647551406e-06	0.00154771	SAMD4A	pseudobulk	up
RAB7B	3.23358	3.3268	34.1451	0.00185303	0.0140914	RAB7B	pseudobulk	up
IBSP	3.23233	-1.91451	6.67189	0.0516558	0.101507	IBSP	pseudobulk	up
BTN3A3	3.23201	3.2406	189.422	2.84546441344368e-05	0.0021367	BTN3A3	pseudobulk	up
FCHO2	3.22736	5.40026	331.088	6.88184622076495e-06	0.00153886	FCHO2	pseudobulk	up
MGLL	3.22438	4.14994	178.621	3.29841929534181e-05	0.00223958	MGLL	pseudobulk	up
PDLIM4	3.22251	0.0150346	27.9972	0.00171482	0.0134442	PDLIM4	pseudobulk	up
EPAS1	3.21519	3.77903	87.2338	0.000197374	0.00490616	EPAS1	pseudobulk	up
IFI30	3.20684	7.31385	212.768	2.11894845732038e-05	0.00198253	IFI30	pseudobulk	up
CD83	3.18989	5.08768	248.64	1.42714348778355e-05	0.00178381	CD83	pseudobulk	up
SORCS2	3.18563	1.0514	66.8966	0.000384541	0.00687433	SORCS2	pseudobulk	up
TSPO	3.18349	5.5829	261.298	1.25785908368458e-05	0.0016908	TSPO	pseudobulk	up
CRYBG1	3.18196	3.2948	206.462	2.28827923972545e-05	0.00203032	CRYBG1	pseudobulk	up
VDR	3.17854	0.403056	28.4438	0.00279045	0.0172667	VDR	pseudobulk	up
BCL6	3.1763	2.70239	179.917	3.24268300572897e-05	0.00222721	BCL6	pseudobulk	up
LITAF	3.17457	6.66958	152.871	4.88109396108441e-05	0.00264308	LITAF	pseudobulk	up
CTSD	3.17315	7.27913	93.3088	0.000167118	0.00452468	CTSD	pseudobulk	up
DRAM1	3.17082	3.83614	230.567	1.7289986508115e-05	0.00184268	DRAM1	pseudobulk	up
CAPN2	3.16972	3.56999	210.216	2.18571993465259e-05	0.00199466	CAPN2	pseudobulk	up
CXCL6	3.16418	-1.28277	4.97284	0.0664284	0.122321	CXCL6	pseudobulk	up
IL15	3.16207	1.64721	13.6132	0.01335	0.0410793	IL15	pseudobulk	up
PCDHGA9	3.15935	-1.54678	5.01648	0.0635886	0.118294	PCDHGA9	pseudobulk	up
APOE	3.15721	12.2613	62.5763	0.000443731	0.00719617	APOE	pseudobulk	up
CLMN	3.15325	0.835678	61.7039	0.000471395	0.00733218	CLMN	pseudobulk	up
MS4A4E	3.14834	4.2744	305.79	8.42968789569263e-06	0.00154771	MS4A4E	pseudobulk	up
STAT1	3.14116	5.8211	49.6911	0.000771086	0.00912301	STAT1	pseudobulk	up
EFCAB13	3.1355	4.11064	168.251	3.83558739071682e-05	0.0023335	EFCAB13	pseudobulk	up
S1PR1	3.12659	0.190581	15.7239	0.00730071	0.0287838	S1PR1	pseudobulk	up
CCDC170	3.1238	3.28919	178.089	3.32482319380313e-05	0.00223958	CCDC170	pseudobulk	up
TCN2	3.12011	2.5472	138.773	6.24063176351358e-05	0.00287802	TCN2	pseudobulk	up
EYA2	3.11316	4.29432	172.841	3.58378757360454e-05	0.00228721	EYA2	pseudobulk	up
LILRA4	3.11256	3.23824	44.4121	0.00100599	0.0104026	LILRA4	pseudobulk	up
BIRC7	3.11047	4.7704	87.3417	0.000196703	0.00489881	BIRC7	pseudobulk	up
BHLHE40	3.10929	4.14095	159.581	4.38201354129459e-05	0.00249393	BHLHE40	pseudobulk	up
LMX1B	3.1082	3.00435	9.37031	0.0269352	0.0642016	LMX1B	pseudobulk	up
CLUL1	3.10717	-1.10184	6.15492	0.0430943	0.08883	CLUL1	pseudobulk	up
KLHDC8B	3.10637	5.26126	193.574	2.69190346679896e-05	0.00209103	KLHDC8B	pseudobulk	up
CXCL9	3.10375	-0.487468	14.0519	0.0117012	0.0379287	CXCL9	pseudobulk	up
GDPD5	3.09911	-0.240409	20.7036	0.00479574	0.0226363	GDPD5	pseudobulk	up
PCDHGA7	3.09634	-0.58624	19.4555	0.00542159	0.0243803	PCDHGA7	pseudobulk	up
LILRA1	3.09321	3.26496	81.4501	0.000233636	0.00528838	LILRA1	pseudobulk	up
AC099489.1	3.08828	1.98067	111.598	0.000107649	0.00376626	AC099489.1	pseudobulk	up
PATL2	3.08455	2.67748	167.874	3.8623377126471e-05	0.0023335	PATL2	pseudobulk	up
FGL2	3.08078	6.43233	152.022	4.94986705730642e-05	0.00265826	FGL2	pseudobulk	up
PLAUR	3.07414	6.58181	317.75	7.64268817590946e-06	0.00154771	PLAUR	pseudobulk	up
TMEM176B	3.06846	5.40534	262.836	1.23924784427607e-05	0.0016908	TMEM176B	pseudobulk	up
OCIAD2	3.06818	1.3535	74.2477	0.000298754	0.00606336	OCIAD2	pseudobulk	up
EGR2	3.06745	1.72097	64.7862	0.000410679	0.00702417	EGR2	pseudobulk	up
PPFIBP1	3.06618	2.48234	84.0083	0.00021679	0.00509837	PPFIBP1	pseudobulk	up
PCDHGA6	3.06127	-0.50744	21.6432	0.00405269	0.020781	PCDHGA6	pseudobulk	up
DBI	3.05164	4.20175	161.094	4.27908284673218e-05	0.00247089	DBI	pseudobulk	up
MCTP1	3.04521	5.14637	214.755	2.06975439331325e-05	0.00198253	MCTP1	pseudobulk	up
LGI4	3.04446	-0.863985	15.6907	0.00732941	0.0288273	LGI4	pseudobulk	up
CCL8	3.03267	4.22078	68.6569	0.000354515	0.00660917	CCL8	pseudobulk	up
CFAP69	3.03147	-0.664141	16.2977	0.00767864	0.0295951	CFAP69	pseudobulk	up
LBX2	3.0264	-0.409568	11.9326	0.0145571	0.0435181	LBX2	pseudobulk	up
KLF10	3.02522	3.07948	198.209	2.53721058947903e-05	0.00208243	KLF10	pseudobulk	up
LRRC63	3.02294	0.124087	28.3637	0.00279804	0.0172781	LRRC63	pseudobulk	up
GATA3	3.01435	1.61864	23.8971	0.00417041	0.02107	GATA3	pseudobulk	up
NPIPB15	3.01257	1.64335	26.9365	0.00320729	0.0184375	NPIPB15	pseudobulk	up
MCOLN2	3.01216	2.88429	9.97115	0.0240164	0.0596139	MCOLN2	pseudobulk	up
MPZL2	3.01107	-1.63094	3.83079	0.0980346	0.162519	MPZL2	pseudobulk	up
EDNRB	3.00355	0.957139	20.5409	0.00579016	0.0251885	EDNRB	pseudobulk	up
BLVRA	3.00229	4.02022	41.7237	0.00116449	0.0112002	BLVRA	pseudobulk	up
NIBAN1	3.00131	2.32834	141.706	5.91374203636607e-05	0.00280913	NIBAN1	pseudobulk	up
CDCA7L	3.00026	3.41233	76.5829	0.000271656	0.00572715	CDCA7L	pseudobulk	up
PAX3	2.99747	1.94076	75.8716	0.000280326	0.00581996	PAX3	pseudobulk	up
SLAMF7	2.99093	2.62419	32.5844	0.00206521	0.0147677	SLAMF7	pseudobulk	up
TLR2	2.99077	6.70107	307.362	8.31870295171563e-06	0.00154771	TLR2	pseudobulk	up
BATF2	2.99023	0.746466	44.0733	0.00103284	0.0105246	BATF2	pseudobulk	up
SPTBN2	2.98781	-2.03999	1.3731	0.303811	0.394382	SPTBN2	pseudobulk	up
BBC3	2.98661	3.8211	162.805	4.16733769361441e-05	0.00241935	BBC3	pseudobulk	up
DYSF	2.98454	3.42317	12.8253	0.0149662	0.0442175	DYSF	pseudobulk	up
PLEK2	2.98329	0.577283	38.5396	0.00141988	0.012353	PLEK2	pseudobulk	up
KIAA0040	2.9821	1.71962	51.6894	0.00070792	0.00875673	KIAA0040	pseudobulk	up
LDLRAD3	2.98054	2.02963	109.243	0.000113466	0.00384262	LDLRAD3	pseudobulk	up
TNNI2	2.9799	3.02294	127.43	7.70838596572108e-05	0.00315784	TNNI2	pseudobulk	up
SNX32	2.97408	-0.459799	14.231	0.0100397	0.034542	SNX32	pseudobulk	up
RAB42	2.97212	4.3662	34.9103	0.00176074	0.0136889	RAB42	pseudobulk	up
ATF3	2.97137	2.08064	97.8323	0.000149219	0.00428327	ATF3	pseudobulk	up
IQGAP2	2.96809	4.97595	99.104	0.000143994	0.00423577	IQGAP2	pseudobulk	up
TTLL9	2.96597	-0.194918	19.3414	0.00647881	0.0268323	TTLL9	pseudobulk	up
GNG12	2.96541	1.33079	58.4872	0.000530559	0.00774474	GNG12	pseudobulk	up
KIAA0319	2.96432	-1.35887	5.48233	0.0527457	0.103044	KIAA0319	pseudobulk	up
FAM3B	2.96432	-1.29972	5.50697	0.0523444	0.10249	FAM3B	pseudobulk	up
GPR150	2.96163	-0.878812	13.9293	0.00888449	0.032204	GPR150	pseudobulk	up
FAM218A	2.95889	0.443976	46.8393	0.000909197	0.00988752	FAM218A	pseudobulk	up
EPSTI1	2.95535	6.61296	71.0545	0.000326038	0.00639392	EPSTI1	pseudobulk	up
METRNL	2.95423	5.71577	217.79	1.99738955487399e-05	0.00195984	METRNL	pseudobulk	up
PIR	2.94476	2.29043	102.412	0.000132949	0.00412109	PIR	pseudobulk	up
PRSS36	2.94174	4.06135	116.573	9.62179452776454e-05	0.00357449	PRSS36	pseudobulk	up
GP6	2.94117	-2.04993	4.36821	0.101951	0.167522	GP6	pseudobulk	up
PGM5	2.93903	2.54639	108.967	0.000113953	0.00384262	PGM5	pseudobulk	up
ARHGEF16	2.92382	1.35285	30.0605	0.00251044	0.0163235	ARHGEF16	pseudobulk	up
B2M	2.92352	7.43525	314.674	7.83461247269348e-06	0.00154771	B2M	pseudobulk	up
C2orf81	2.91978	-1.10205	13.4573	0.0104001	0.0352918	C2orf81	pseudobulk	up
DPEP2	2.91664	4.87782	133.734	6.82720768914794e-05	0.00297977	DPEP2	pseudobulk	up
WIPF3	2.91585	2.14291	14.0281	0.0126516	0.0398082	WIPF3	pseudobulk	up
TSKS	2.90869	-0.320002	19.6777	0.00485389	0.0227976	TSKS	pseudobulk	up
ZNF439	2.90112	1.91854	104.676	0.00012616	0.00403527	ZNF439	pseudobulk	up
LILRA5	2.89606	1.26346	18.0634	0.00755582	0.029305	LILRA5	pseudobulk	up
C4BPB	2.89415	-1.56462	5.52132	0.0526254	0.102886	C4BPB	pseudobulk	up
DPEP3	2.89316	0.106974	12.5958	0.0155981	0.0452947	DPEP3	pseudobulk	up
HESX1	2.89303	2.39279	57.7995	0.000537876	0.00780706	HESX1	pseudobulk	up
TXK	2.86785	0.229457	30.6793	0.00232926	0.0157157	TXK	pseudobulk	up
ZNF438	2.85948	4.10406	239.671	1.56686465103761e-05	0.00180952	ZNF438	pseudobulk	up
PARP12	2.85917	5.62201	68.5644	0.000355601	0.00661996	PARP12	pseudobulk	up
CNN2	2.85392	0.773756	43.6717	0.00106281	0.0106891	CNN2	pseudobulk	up
MELTF	2.85083	3.51836	90.4694	0.000180398	0.00468406	MELTF	pseudobulk	up
RGS1	2.84646	6.60612	277.675	1.07755645582787e-05	0.00159797	RGS1	pseudobulk	up
ITGB8	2.84606	0.615697	42.2732	0.00113929	0.0111536	ITGB8	pseudobulk	up
ZNF442	2.84523	-0.951029	10.6723	0.0162999	0.0466936	ZNF442	pseudobulk	up
CCRL2	2.8438	2.48134	28.6699	0.00275593	0.0171936	CCRL2	pseudobulk	up
IFIH1	2.83859	5.0477	136.399	6.49808338989588e-05	0.00291023	IFIH1	pseudobulk	up
NR1I2	2.83628	0.0631157	33.2986	0.00198036	0.0145027	NR1I2	pseudobulk	up
METTL7B	2.83558	0.395491	20.2569	0.0057436	0.0250766	METTL7B	pseudobulk	up
WARS	2.83467	5.67886	56.8844	0.000558307	0.00791087	WARS	pseudobulk	up
CCR9	2.83208	2.56075	10.561	0.0217148	0.055893	CCR9	pseudobulk	up
TCHH	2.82922	0.823425	49.0411	0.00081259	0.00939265	TCHH	pseudobulk	up
ASB9	2.82913	0.363905	36.4143	0.00162813	0.0131236	ASB9	pseudobulk	up
CAPG	2.82714	8.00033	68.6688	0.000354281	0.00660917	CAPG	pseudobulk	up
APOL1	2.82636	2.78481	114.154	0.000101434	0.00363906	APOL1	pseudobulk	up
DGKI	2.82394	-1.3425	5.76801	0.0608574	0.114535	DGKI	pseudobulk	up
UBE2L6	2.81303	5.3058	246.247	1.46259052032159e-05	0.00178381	UBE2L6	pseudobulk	up
GBP2	2.81288	1.53828	11.5615	0.0182916	0.0502749	GBP2	pseudobulk	up
OSGIN1	2.81162	2.068	104.285	0.000127156	0.00404729	OSGIN1	pseudobulk	up
RRAGD	2.80584	3.64432	34.1183	0.00185606	0.0140914	RRAGD	pseudobulk	up
ZNF681	2.80557	-0.168807	17.1455	0.00817855	0.0308023	ZNF681	pseudobulk	up
OPTN	2.80516	3.05489	41.6738	0.00117084	0.0112349	OPTN	pseudobulk	up
HAVCR1	2.80508	-0.793331	15.7631	0.00834918	0.0311114	HAVCR1	pseudobulk	up
MICAL2	2.80424	4.20092	155.541	4.67393394179366e-05	0.00258453	MICAL2	pseudobulk	up
IGF2R	2.79605	4.89136	136.411	6.49663467591821e-05	0.00291023	IGF2R	pseudobulk	up
CD38	2.78437	2.46394	11.7287	0.0177669	0.0493841	CD38	pseudobulk	up
CCL3	2.78296	3.92636	109.422	0.000112646	0.00384262	CCL3	pseudobulk	up
IRF6	2.78267	-0.910408	9.1919	0.0240719	0.0597107	IRF6	pseudobulk	up
BARHL1	2.76468	-0.159728	9.32918	0.0217565	0.0559719	BARHL1	pseudobulk	up
C1orf127	2.76186	2.49146	119.576	9.0385526128926e-05	0.00345476	C1orf127	pseudobulk	up
PRXL2B	2.7581	3.43166	101.434	0.000135974	0.00413626	PRXL2B	pseudobulk	up
MCUB	2.75634	2.14633	113.958	0.000101979	0.00363906	MCUB	pseudobulk	up
GLIPR1L2	2.75404	-0.736756	8.32971	0.0303656	0.0694726	GLIPR1L2	pseudobulk	up
PDE6G	2.75371	0.537271	38.3022	0.00144601	0.0124659	PDE6G	pseudobulk	up
GPR155	2.75177	2.69845	133.188	6.90412369118403e-05	0.00300329	GPR155	pseudobulk	up
HSF4	2.75034	4.10422	230.692	1.7263556753123e-05	0.00184268	HSF4	pseudobulk	up
GBP1	2.74874	3.08236	6.50065	0.0497144	0.0985228	GBP1	pseudobulk	up
MYO1A	2.74828	2.37428	69.9727	0.000338733	0.00651985	MYO1A	pseudobulk	up
VAMP5	2.74745	2.13702	105.994	0.000122121	0.0039972	VAMP5	pseudobulk	up
SOX14	2.74386	3.77459	28.5625	0.00277773	0.0172322	SOX14	pseudobulk	up
GSDMA	2.74184	1.72504	73.0898	0.00030503	0.00614297	GSDMA	pseudobulk	up
HSD3B7	2.74148	2.80358	83.7838	0.000217999	0.00509837	HSD3B7	pseudobulk	up
PHLDB1	2.74144	3.28785	59.6711	0.000497771	0.00751906	PHLDB1	pseudobulk	up
CERS3	2.73611	-1.11986	11.1576	0.0155507	0.0452378	CERS3	pseudobulk	up
MT1F	2.73552	-1.36557	5.36606	0.0606025	0.114122	MT1F	pseudobulk	up
CAPN11	2.7336	0.0490193	12.4739	0.0155162	0.0451879	CAPN11	pseudobulk	up
DIRAS1	2.73215	1.05959	12.5655	0.0156247	0.045352	DIRAS1	pseudobulk	up
LILRB2	2.72984	4.81188	131.679	7.09701657054926e-05	0.00303083	LILRB2	pseudobulk	up
FBXO6	2.72114	1.2009	65.4089	0.000402033	0.0069848	FBXO6	pseudobulk	up
DACT1	2.71698	0.178757	19.0043	0.00661605	0.0271337	DACT1	pseudobulk	up
EPHX1	2.71069	5.10333	109.156	0.000113306	0.00384262	EPHX1	pseudobulk	up
NPM2	2.70842	0.230506	19.2588	0.00663142	0.0271797	NPM2	pseudobulk	up
P2RY8	2.70786	1.24026	30.2689	0.00244733	0.0161324	P2RY8	pseudobulk	up
ALDH5A1	2.7032	0.548526	24.8001	0.00381995	0.0200916	ALDH5A1	pseudobulk	up
FLNA	2.70004	1.62141	73.9235	0.000297553	0.00606336	FLNA	pseudobulk	up
NKX2-4	2.69232	0.335711	7.16878	0.0405455	0.0851495	NKX2-4	pseudobulk	up
PLEKHH1	2.68666	2.56194	59.8395	0.000494623	0.0074969	PLEKHH1	pseudobulk	up
GAS2	2.68631	-1.23614	9.37908	0.0203104	0.0535662	GAS2	pseudobulk	up
ZMYND12	2.68255	-0.922507	14.0741	0.0106658	0.035864	ZMYND12	pseudobulk	up
CTSV	2.68183	-0.620057	15.4933	0.00754027	0.0292723	CTSV	pseudobulk	up
PLXNC1	2.6757	5.39822	190.757	2.79350169311347e-05	0.00212742	PLXNC1	pseudobulk	up
SPAG4	2.67269	-1.02151	12.3448	0.0143801	0.0431205	SPAG4	pseudobulk	up
LILRB1	2.667	5.64556	33.6092	0.00192088	0.0142835	LILRB1	pseudobulk	up
PODXL2	2.66631	-0.0115299	11.8944	0.0148335	0.0439811	PODXL2	pseudobulk	up
FXYD5	2.66379	6.71472	190.473	2.80395469825596e-05	0.00212742	FXYD5	pseudobulk	up
CHI3L1	2.65993	2.95424	89.9109	0.000183194	0.00471536	CHI3L1	pseudobulk	up
CEACAM4	2.655	-0.292621	17.7292	0.00750766	0.0292353	CEACAM4	pseudobulk	up
PARVB	2.65222	3.88555	127.332	7.71916978228193e-05	0.00315784	PARVB	pseudobulk	up
DAGLA	2.65216	2.89207	55.1177	0.000602383	0.00812097	DAGLA	pseudobulk	up
TP73	2.64906	-0.22862	13.647	0.0132081	0.0408161	TP73	pseudobulk	up
CD209	2.6486	4.64686	113.91	0.00010191	0.00363906	CD209	pseudobulk	up
CD79B	2.6474	-1.46881	4.80582	0.0780425	0.137036	CD79B	pseudobulk	up
ABCA10	2.63789	-1.08462	9.83967	0.0190495	0.0514158	ABCA10	pseudobulk	up
ST14	2.63653	4.02507	139.529	6.13943696306957e-05	0.00286136	ST14	pseudobulk	up
EPHB6	2.63557	1.40344	56.6657	0.000566306	0.00793801	EPHB6	pseudobulk	up
SLC7A1	2.6311	2.62875	33.2673	0.00196706	0.0144446	SLC7A1	pseudobulk	up
TNFRSF14	2.63002	7.21291	145.875	5.49052045162044e-05	0.00274588	TNFRSF14	pseudobulk	up
AGRN	2.62541	4.24209	54.2306	0.000626054	0.00828364	AGRN	pseudobulk	up
CHI3L2	2.62326	0.704568	46.484	0.000914417	0.00992905	CHI3L2	pseudobulk	up
NHLRC1	2.62155	0.613707	20.2329	0.00597976	0.0256107	NHLRC1	pseudobulk	up
NKG7	2.61893	-1.58367	4.1148	0.0843905	0.145213	NKG7	pseudobulk	up
CACNA2D4	2.61812	4.32159	153.782	4.80923154188214e-05	0.00262596	CACNA2D4	pseudobulk	up
RCAN3	2.61371	3.08812	158.855	4.43365141918281e-05	0.00250473	RCAN3	pseudobulk	up
CPM	2.61036	5.40231	73.6676	0.00029857	0.00606336	CPM	pseudobulk	up
TAC3	2.60965	-0.548667	17.1312	0.00812491	0.0306548	TAC3	pseudobulk	up
ADAM32	2.60832	-0.231086	12.6501	0.0150192	0.0442938	ADAM32	pseudobulk	up
INPP1	2.60817	1.39777	67.5238	0.000372261	0.00675661	INPP1	pseudobulk	up
GSTT2B	2.6081	0.359617	14.9397	0.0111034	0.0366449	GSTT2B	pseudobulk	up
HPX	2.60511	-0.267726	23.7065	0.00409618	0.0208993	HPX	pseudobulk	up
AGPAT4	2.60195	3.44406	166.304	3.94995898415674e-05	0.00236454	AGPAT4	pseudobulk	up
GCSAM	2.60045	-0.748726	13.8762	0.0125946	0.0396658	GCSAM	pseudobulk	up
ARHGEF5	2.59848	0.192009	22.4868	0.00464936	0.0222657	ARHGEF5	pseudobulk	up
PNPLA7	2.59267	5.28679	259.164	1.28436149044208e-05	0.0016908	PNPLA7	pseudobulk	up
PKD1L1	2.5916	-0.673516	17.6803	0.00701268	0.0281326	PKD1L1	pseudobulk	up
OTUB2	2.5887	-0.737947	13.255	0.013331	0.0410597	OTUB2	pseudobulk	up
XAF1	2.58687	6.90149	81.3093	0.000234513	0.00529479	XAF1	pseudobulk	up
LRP5L	2.58056	-1.28626	5.60123	0.0547625	0.105923	LRP5L	pseudobulk	up
C1orf189	2.58056	-1.36743	5.56704	0.0553128	0.106638	C1orf189	pseudobulk	up
IQGAP1	2.57851	4.56379	84.8442	0.000211254	0.00502161	IQGAP1	pseudobulk	up
IL27	2.57235	-0.288397	14.5152	0.0117158	0.0379384	IL27	pseudobulk	up
IL18R1	2.57211	-0.33046	20.1078	0.00597295	0.0256068	IL18R1	pseudobulk	up
TMEM255A	2.56096	1.10148	52.3195	0.0006903	0.00865361	TMEM255A	pseudobulk	up
LIPA	2.55831	6.24431	24.2902	0.00397881	0.0205556	LIPA	pseudobulk	up
STX11	2.55818	3.86521	118.035	9.32747080813995e-05	0.00351802	STX11	pseudobulk	up
SLC17A9	2.55709	4.60312	230.137	1.73677467542368e-05	0.00184268	SLC17A9	pseudobulk	up
EFCAB6	2.55584	0.458822	29.4948	0.00258427	0.016605	EFCAB6	pseudobulk	up
SLC22A15	2.55162	4.30355	198.5	2.52626169081146e-05	0.00208243	SLC22A15	pseudobulk	up
GADD45G	2.54626	2.59775	40.6205	0.00124002	0.0115544	GADD45G	pseudobulk	up
DHDH	2.54497	2.17943	64.3272	0.000415441	0.00703826	DHDH	pseudobulk	up
TGIF1	2.54479	4.00036	33.1408	0.00198363	0.0145133	TGIF1	pseudobulk	up
DOP1B	2.54306	4.0323	144.383	5.63466303272897e-05	0.00276563	DOP1B	pseudobulk	up
SGCG	2.53656	-1.19062	14.4348	0.00948385	0.0335132	SGCG	pseudobulk	up
HK3	2.53491	5.41722	251.602	1.38477002604926e-05	0.00177169	HK3	pseudobulk	up
PPA1	2.52947	0.711657	20.1948	0.00599078	0.0256495	PPA1	pseudobulk	up
BIRC3	2.52289	0.10329	26.9364	0.00322008	0.0184794	BIRC3	pseudobulk	up
CBR1	2.52225	2.09658	80.525	0.00024043	0.00533606	CBR1	pseudobulk	up
IQCJ	2.52124	-0.845945	3.67364	0.0982928	0.162885	IQCJ	pseudobulk	up
GIMAP7	2.52019	3.72948	52.3182	0.00068213	0.0085926	GIMAP7	pseudobulk	up
TRIM61	2.52002	-0.391039	7.45751	0.0393802	0.083439	TRIM61	pseudobulk	up
CD151	2.51863	3.70834	8.82129	0.029881	0.0687627	CD151	pseudobulk	up
ARRDC4	2.51854	1.76358	67.7912	0.000366353	0.00668658	ARRDC4	pseudobulk	up
KIF12	2.51756	0.023731	29.4901	0.00263061	0.016746	KIF12	pseudobulk	up
GPR65	2.51718	4.27221	169.734	3.75127344930517e-05	0.00231474	GPR65	pseudobulk	up
PLA2G4C	2.51523	2.2695	32.0698	0.00213931	0.0150339	PLA2G4C	pseudobulk	up
LRP2BP	2.51466	-1.30823	4.04995	0.0895231	0.151705	LRP2BP	pseudobulk	up
SLC2A9	2.51054	4.69553	111.772	0.000106828	0.00375771	SLC2A9	pseudobulk	up
HES1	2.50644	1.74497	36.9169	0.00155123	0.0128517	HES1	pseudobulk	up
ANKK1	2.50248	-0.825487	8.38221	0.0294583	0.0681934	ANKK1	pseudobulk	up
SELENOM	2.49745	3.37817	132.13	7.03786220313457e-05	0.00303083	SELENOM	pseudobulk	up
PCBD1	2.49586	2.91554	78.2542	0.000257699	0.00554946	PCBD1	pseudobulk	up
ZNF471	2.49475	-0.737381	9.11426	0.0264053	0.0634673	ZNF471	pseudobulk	up
SP110	2.49054	5.7589	81.0948	0.000236039	0.00532006	SP110	pseudobulk	up
ARHGAP8	2.49048	3.52604	105.842	0.000122343	0.0039972	ARHGAP8	pseudobulk	up
LPIN3	2.48549	2.81428	117.212	9.4945887285139e-05	0.00356047	LPIN3	pseudobulk	up
CCDC175	2.48468	-1.37766	6.95619	0.0379891	0.0813384	CCDC175	pseudobulk	up
ZNF618	2.48124	5.73471	167.326	3.88838827532422e-05	0.00233841	ZNF618	pseudobulk	up
S100A9	2.47958	3.9415	59.3334	0.000504554	0.00756567	S100A9	pseudobulk	up
AP1S2	2.47741	3.54565	170.522	3.70811677373293e-05	0.00230433	AP1S2	pseudobulk	up
KIAA1614	2.47633	2.42178	64.4869	0.000412901	0.00703826	KIAA1614	pseudobulk	up
DOCK3	2.47351	-0.537408	14.4707	0.0114173	0.0373235	DOCK3	pseudobulk	up
GYPC	2.47285	4.35241	33.6474	0.00191595	0.0142835	GYPC	pseudobulk	up
IFI35	2.47081	5.11276	42.0376	0.00114411	0.01117	IFI35	pseudobulk	up
MYBPC2	2.47037	-1.38209	6.79961	0.0378779	0.0811937	MYBPC2	pseudobulk	up
SLC43A3	2.46867	4.53328	211.94	2.14012853995591e-05	0.00198253	SLC43A3	pseudobulk	up
TRPC1	2.46612	0.0985814	21.8052	0.00510733	0.0235848	TRPC1	pseudobulk	up
CABP4	2.46148	3.17235	137.825	6.33283626124429e-05	0.00287956	CABP4	pseudobulk	up
ZNF563	2.45997	1.78643	64.6737	0.000410493	0.00702417	ZNF563	pseudobulk	up
HIST1H2BB	2.45988	-1.20228	8.05222	0.0293064	0.0679547	HIST1H2BB	pseudobulk	up
KCNQ4	2.45851	-1.547	3.81725	0.0974486	0.161794	KCNQ4	pseudobulk	up
APOBEC3H	2.45204	-0.627762	17.8553	0.00666912	0.0272657	APOBEC3H	pseudobulk	up
SLC16A6	2.45136	0.871203	39.8628	0.00130937	0.011913	SLC16A6	pseudobulk	up
NR1H3	2.44817	5.68186	66.2228	0.000386888	0.00689872	NR1H3	pseudobulk	up
SDSL	2.44075	3.85606	175.9	3.42863944901223e-05	0.00223958	SDSL	pseudobulk	up
ANKRD33B	2.44051	0.675238	30.2039	0.00248267	0.0162282	ANKRD33B	pseudobulk	up
GCLM	2.44013	0.30924	25.5107	0.00362791	0.0195745	GCLM	pseudobulk	up
GGT1	2.43885	-1.19712	10.1692	0.0206143	0.0540272	GGT1	pseudobulk	up
NT5C3B	2.43731	3.35537	145.66	5.51279903393103e-05	0.00274588	NT5C3B	pseudobulk	up
FBXO39	2.43527	-1.27203	12.9415	0.0111385	0.036697	FBXO39	pseudobulk	up
ATP5MD	2.43307	-0.712248	12.1109	0.0149184	0.0441263	ATP5MD	pseudobulk	up
AL160269.1	2.43128	0.250231	15.987	0.00976253	0.0339849	AL160269.1	pseudobulk	up
XYLT1	2.42845	3.4062	52.0593	0.000690282	0.00865361	XYLT1	pseudobulk	up
FAM50B	2.42759	2.94273	61.1723	0.00046887	0.00731908	FAM50B	pseudobulk	up
VMP1	2.42244	5.91715	225.26	1.83363332966593e-05	0.00189912	VMP1	pseudobulk	up
TSTD1	2.42084	2.45956	104.994	0.000124884	0.004034	TSTD1	pseudobulk	up
SYNE2	2.4172	1.61773	16.4741	0.0091145	0.032686	SYNE2	pseudobulk	up
ANKRD6	2.41036	2.33057	25.0774	0.00371061	0.0197599	ANKRD6	pseudobulk	up
SPINT1	2.40827	4.49223	75.613	0.000280167	0.00581996	SPINT1	pseudobulk	up
MFSD2A	2.40583	2.47444	89.0304	0.000187749	0.00476678	MFSD2A	pseudobulk	up
PPP1R15A	2.40013	4.25061	102.749	0.000131668	0.00411749	PPP1R15A	pseudobulk	up
VMO1	2.39943	4.13892	37.0667	0.0015336	0.0128127	VMO1	pseudobulk	up
ZNF804A	2.39881	1.23644	21.033	0.00544744	0.024446	ZNF804A	pseudobulk	up
CD69	2.39569	1.45436	23.9351	0.00411416	0.0209298	CD69	pseudobulk	up
PLEKHN1	2.39268	-0.561125	7.29294	0.0395615	0.083662	PLEKHN1	pseudobulk	up
C1orf54	2.39025	3.58872	156.996	4.56582182429668e-05	0.00253739	C1orf54	pseudobulk	up
TANC2	2.38946	5.73257	138.61	6.24122560875941e-05	0.00287802	TANC2	pseudobulk	up
AHR	2.38706	4.28269	56.1414	0.000576214	0.00796118	AHR	pseudobulk	up
GAS2L3	2.38589	3.10964	112.067	0.000106149	0.0037439	GAS2L3	pseudobulk	up
CHCHD2	2.38557	3.83405	20.1911	0.00593343	0.0255488	CHCHD2	pseudobulk	up
STAP2	2.38455	0.178522	25.816	0.00351629	0.0192401	STAP2	pseudobulk	up
CASP7	2.38445	2.67765	85.575	0.000206924	0.0049639	CASP7	pseudobulk	up
IRF7	2.38329	5.97315	40.8505	0.00122336	0.011469	IRF7	pseudobulk	up
PARP14	2.37713	7.04665	48.3599	0.000822396	0.00943963	PARP14	pseudobulk	up
NADK	2.37642	5.58276	163.921	4.09517712037975e-05	0.00240921	NADK	pseudobulk	up
HERC5	2.3754	4.28744	29.078	0.00266809	0.0168878	HERC5	pseudobulk	up
PARP9	2.37274	4.32292	29.707	0.00254255	0.0164421	PARP9	pseudobulk	up
SLC22A18AS	2.37206	2.15462	36.2698	0.00161358	0.0130728	SLC22A18AS	pseudobulk	up
KLHL3	2.37064	1.03461	46.1332	0.000926409	0.00994213	KLHL3	pseudobulk	up
ESRRB	2.37046	0.807614	32.6124	0.00208178	0.0148171	ESRRB	pseudobulk	up
DKK1	2.36586	-0.504881	9.7774	0.0248154	0.0609299	DKK1	pseudobulk	up
KCNH4	2.36572	0.413183	32.9631	0.00203252	0.0146345	KCNH4	pseudobulk	up
GCNT1	2.36366	-0.100144	13.5316	0.0135889	0.041511	GCNT1	pseudobulk	up
LONRF1	2.35976	1.94219	85.1762	0.000209426	0.00499635	LONRF1	pseudobulk	up
CLIC4	2.35729	2.51159	92.3028	0.000171752	0.00456804	CLIC4	pseudobulk	up
TRPV4	2.35686	5.12581	63.39	0.000430099	0.00713442	TRPV4	pseudobulk	up
SELENOP	2.35609	5.88953	22.8522	0.00454585	0.022053	SELENOP	pseudobulk	up
CSGALNACT2	2.34954	4.5376	140.13	6.07316181651596e-05	0.00284067	CSGALNACT2	pseudobulk	up
CSTB	2.34809	4.68065	41.2612	0.00119513	0.0113428	CSTB	pseudobulk	up
TAP2	2.34693	4.49229	63.0907	0.000435056	0.00716854	TAP2	pseudobulk	up
ACOT4	2.34605	-0.778299	7.4878	0.0361134	0.0785073	ACOT4	pseudobulk	up
NME8	2.34565	2.04639	37.1101	0.00153135	0.0128127	NME8	pseudobulk	up
COL9A1	2.3409	-1.28775	3.03694	0.138068	0.211081	COL9A1	pseudobulk	up
CPPED1	2.33935	4.22744	50.9705	0.000725866	0.00886944	CPPED1	pseudobulk	up
TOGARAM2	2.33847	-1.07662	3.54127	0.108277	0.175029	TOGARAM2	pseudobulk	up
PDE3A	2.33734	0.0263065	11.7565	0.0168027	0.0476375	PDE3A	pseudobulk	up
FTL	2.33408	9.21253	211.247	2.15781127788871e-05	0.00198306	FTL	pseudobulk	up
ABCC3	2.33362	5.16284	147.572	5.33355370294442e-05	0.00274588	ABCC3	pseudobulk	up
DOC2A	2.32994	3.83959	148.126	5.28431472401342e-05	0.00274588	DOC2A	pseudobulk	up
PMP22	2.32918	4.37054	147.477	5.34247532356158e-05	0.00274588	PMP22	pseudobulk	up
SLC18A2	2.32616	-1.10245	7.68991	0.0307184	0.0699226	SLC18A2	pseudobulk	up
NFE2L3	2.3261	-0.218581	9.61912	0.0236875	0.0591025	NFE2L3	pseudobulk	up
NEK8	2.3248	1.40786	54.4056	0.000623507	0.00828364	NEK8	pseudobulk	up
CCL3L1	2.32311	-0.618036	12.5969	0.0134999	0.0413748	CCL3L1	pseudobulk	up
KCNJ5	2.32278	5.30503	201.043	2.44605255012828e-05	0.0020683	KCNJ5	pseudobulk	up
ACKR3	2.31982	2.40602	87.8637	0.000193963	0.00486167	ACKR3	pseudobulk	up
TACR2	2.31501	-0.77648	13.4486	0.0133345	0.0410608	TACR2	pseudobulk	up
SAMD9	2.31487	3.95243	59.9458	0.000492209	0.00747768	SAMD9	pseudobulk	up
CCL23	2.3138	-1.57988	4.9714	0.0644816	0.119699	CCL23	pseudobulk	up
SDCBP	2.30721	4.43375	138.202	6.28779639201927e-05	0.00287956	SDCBP	pseudobulk	up
RAB24	2.30182	2.70467	65.7489	0.000393828	0.00693583	RAB24	pseudobulk	up
CDK6	2.30123	3.38357	95.3912	0.000158269	0.00440956	CDK6	pseudobulk	up
PLIN2	2.30116	1.98285	72.127	0.000314768	0.00627996	PLIN2	pseudobulk	up
PNMA5	2.30114	-0.070186	8.08475	0.0348851	0.0765513	PNMA5	pseudobulk	up
VAT1	2.29963	5.44088	38.2762	0.00142352	0.0123654	VAT1	pseudobulk	up
SLC25A43	2.29653	2.38339	92.8248	0.000169385	0.00452967	SLC25A43	pseudobulk	up
FKBP9	2.29351	1.78119	72.3011	0.000312876	0.00627193	FKBP9	pseudobulk	up
CD82	2.28968	4.34326	100.434	0.000139319	0.00417638	CD82	pseudobulk	up
KCNK10	2.28507	-1.81065	2.24041	0.180384	0.260486	KCNK10	pseudobulk	up
GPR146	2.28444	-0.830613	10.6969	0.0197883	0.052674	GPR146	pseudobulk	up
DNASE1L1	2.27847	4.75533	81.5884	0.000232556	0.00528838	DNASE1L1	pseudobulk	up
GGACT	2.276	1.24651	36.6559	0.0015769	0.0129751	GGACT	pseudobulk	up
CD6	2.27482	3.20553	73.2541	0.000302737	0.00612491	CD6	pseudobulk	up
TMEM14A	2.27446	1.14319	33.054	0.00200277	0.0145411	TMEM14A	pseudobulk	up
EIF2AK2	2.27353	5.86525	62.1183	0.000451677	0.00719617	EIF2AK2	pseudobulk	up
FHIT	2.27328	3.002	20.2001	0.00592823	0.0255409	FHIT	pseudobulk	up
TENT5C	2.27059	-1.47415	7.34943	0.0379772	0.0813262	TENT5C	pseudobulk	up
FRK	2.26758	-1.03656	6.72424	0.0428036	0.088398	FRK	pseudobulk	up
CCL5	2.26692	2.10608	18.6302	0.007045	0.0282028	CCL5	pseudobulk	up
ZBTB42	2.26538	2.39999	56.6337	0.000564487	0.00793801	ZBTB42	pseudobulk	up
ZNF474	2.2627	-1.14681	7.46135	0.0369596	0.0797887	ZNF474	pseudobulk	up
CD63	2.26131	6.83831	79.2029	0.000250097	0.00549455	CD63	pseudobulk	up
SIGLEC7	2.25739	4.3919	80.5546	0.00023995	0.00533606	SIGLEC7	pseudobulk	up
MT1X	2.2569	0.236109	14.7611	0.0114611	0.0374086	MT1X	pseudobulk	up
TMEM144	2.25029	4.45222	57.7682	0.000538021	0.00780706	TMEM144	pseudobulk	up
ELL3	2.25013	-0.61359	16.5121	0.00905219	0.03255	ELL3	pseudobulk	up
CBLN3	2.24992	0.790029	39.2594	0.00134986	0.01213	CBLN3	pseudobulk	up
TFAP2E	2.24736	1.26539	42.7686	0.00110456	0.0109783	TFAP2E	pseudobulk	up
PDPN	2.24477	3.78875	85.6522	0.000206401	0.0049639	PDPN	pseudobulk	up
FCGR2A	2.24349	7.14283	204.646	2.33845081909535e-05	0.00203502	FCGR2A	pseudobulk	up
FTH1	2.24334	9.45585	242.289	1.52398281442566e-05	0.001808	FTH1	pseudobulk	up
APOC4	2.24202	2.57606	75.485	0.00028141	0.00581996	APOC4	pseudobulk	up
S100A8	2.24007	1.36685	21.1914	0.00540077	0.0243371	S100A8	pseudobulk	up
TUBB6	2.23723	2.2537	58.8248	0.000515503	0.00762702	TUBB6	pseudobulk	up
BTN3A1	2.23546	3.29525	72.4968	0.000310506	0.006234	BTN3A1	pseudobulk	up
PSMB8	2.23512	4.23381	159.381	4.39542498352572e-05	0.00249393	PSMB8	pseudobulk	up
ZNF626	2.2279	1.59358	56.1914	0.00057631	0.00796118	ZNF626	pseudobulk	up
SHISA5	2.22745	3.15318	85.9717	0.000204535	0.00494413	SHISA5	pseudobulk	up
SLC36A1	2.22728	5.45253	31.4803	0.00222989	0.0153887	SLC36A1	pseudobulk	up
TNFSF13	2.22454	6.84323	144.351	5.63721561351911e-05	0.00276563	TNFSF13	pseudobulk	up
FRMD3	2.2243	-0.504928	11.6019	0.0182071	0.0501067	FRMD3	pseudobulk	up
PECAM1	2.22409	5.98274	75.2771	0.000283217	0.00582963	PECAM1	pseudobulk	up
MYZAP	2.22131	-0.54345	5.19826	0.0697183	0.126067	MYZAP	pseudobulk	up
CD37	2.21933	6.74459	95.3366	0.000158474	0.00440956	CD37	pseudobulk	up
BLOC1S2	2.21066	3.50555	46.7309	0.000891965	0.00984706	BLOC1S2	pseudobulk	up
MMP19	2.20539	0.186435	18.9386	0.00686393	0.0277423	MMP19	pseudobulk	up
SLC2A3	2.20293	1.41339	26.4685	0.00329907	0.0186795	SLC2A3	pseudobulk	up
PADI2	2.19519	4.48534	100.483	0.000139149	0.00417638	PADI2	pseudobulk	up
C2	2.1947	5.49785	121.319	8.70922750686861e-05	0.00336772	C2	pseudobulk	up
HPSE	2.19364	5.64672	51.39	0.000711807	0.00877457	HPSE	pseudobulk	up
SLC31A2	2.19253	2.8759	102.859	0.000131351	0.00411749	SLC31A2	pseudobulk	up
PRXL2A	2.1921	4.23744	71.6597	0.00031939	0.00631597	PRXL2A	pseudobulk	up
ATF5	2.19153	4.38009	130.066	7.31907273658699e-05	0.00306134	ATF5	pseudobulk	up
RAP2B	2.19019	7.328	65.3992	0.000398802	0.00696788	RAP2B	pseudobulk	up
ASAH1	2.18582	7.04097	38.4655	0.0014073	0.0123183	ASAH1	pseudobulk	up
SUSD1	2.18516	5.22305	127.11	7.75197796408032e-05	0.00316135	SUSD1	pseudobulk	up
ARHGEF10	2.17883	1.65789	46.4289	0.000906855	0.00988679	ARHGEF10	pseudobulk	up
CD101	2.17854	0.0904173	23.4528	0.00435199	0.0215453	CD101	pseudobulk	up
KIAA1217	2.17626	-1.76769	1.23088	0.313154	0.40434	KIAA1217	pseudobulk	up
PHLDA2	2.17211	-0.778137	9.16472	0.0266253	0.0637839	PHLDA2	pseudobulk	up
CLEC9A	2.17139	2.61056	12.5073	0.0157099	0.0455283	CLEC9A	pseudobulk	up
RELB	2.16347	3.7722	136.356	6.5035324553789e-05	0.00291023	RELB	pseudobulk	up
SYNE1	2.16277	1.48628	52.7262	0.000670817	0.00854064	SYNE1	pseudobulk	up
CYP2S1	2.15881	2.08081	31.0468	0.00230282	0.0156468	CYP2S1	pseudobulk	up
VSIG10L	2.1581	2.10143	64.1448	0.000418224	0.00704866	VSIG10L	pseudobulk	up
ALDH3B1	2.15514	4.32548	57.2531	0.000549722	0.00785747	ALDH3B1	pseudobulk	up
RGS16	2.15463	2.12176	47.8905	0.000843716	0.00955731	RGS16	pseudobulk	up
GPRIN1	2.14538	-0.537076	8.76258	0.0297553	0.0686053	GPRIN1	pseudobulk	up
RIPOR2	2.14537	-2.01041	3.14259	0.126821	0.197519	RIPOR2	pseudobulk	up
APOL4	2.14368	-0.960087	5.50523	0.0586881	0.111483	APOL4	pseudobulk	up
GALNT6	2.14311	3.45238	111.621	0.000107198	0.00376058	GALNT6	pseudobulk	up
CFB	2.14238	3.81549	143.349	5.73716946361627e-05	0.00278314	CFB	pseudobulk	up
KLRC4	2.14197	-0.805674	8.23358	0.0292908	0.0679306	KLRC4	pseudobulk	up
NEU3	2.14108	3.20067	113.887	0.000101977	0.00363906	NEU3	pseudobulk	up
VSIG10	2.14035	2.19157	52.5768	0.000674485	0.00855396	VSIG10	pseudobulk	up
ZNF311	2.13681	0.714416	27.2485	0.00310508	0.0181873	ZNF311	pseudobulk	up
GRIN3A	2.13666	0.157643	12.7083	0.0153417	0.0448297	GRIN3A	pseudobulk	up
SQOR	2.13589	4.82403	65.8814	0.000391775	0.00693015	SQOR	pseudobulk	up
SLC16A10	2.13173	-0.377668	4.10585	0.0931893	0.156515	SLC16A10	pseudobulk	up
EML6	2.1234	0.407309	11.16	0.0196523	0.0524999	EML6	pseudobulk	up
VWA3A	2.11909	-1.45461	6.11213	0.045362	0.0921153	VWA3A	pseudobulk	up
SLC35G2	2.11859	-0.32145	14.7278	0.0114208	0.0373258	SLC35G2	pseudobulk	up
PLA2G7	2.11823	5.87732	15.8583	0.00981239	0.0340473	PLA2G7	pseudobulk	up
EPS8L1	2.11496	1.87858	36.4674	0.0015936	0.0130451	EPS8L1	pseudobulk	up
SMIM38	2.11189	-0.219324	11.94	0.0172367	0.0484574	SMIM38	pseudobulk	up
MYO10	2.11063	2.94535	69.2686	0.000346938	0.00658446	MYO10	pseudobulk	up
DHRS4	2.10996	0.3613	23.9104	0.00415918	0.0210296	DHRS4	pseudobulk	up
RCN1	2.10718	-0.211606	16.3407	0.00932598	0.033189	RCN1	pseudobulk	up
ZNF844	2.10386	0.428491	17.3371	0.00824011	0.0309182	ZNF844	pseudobulk	up
CD93	2.09932	5.3025	136.803	6.44993987277061e-05	0.00291023	CD93	pseudobulk	up
TMEM204	2.09856	-0.104072	16.3669	0.00929887	0.0331468	TMEM204	pseudobulk	up
NUP210	2.0985	3.91726	115.743	9.79383324823385e-05	0.00357616	NUP210	pseudobulk	up
ACOT11	2.0965	5.19228	7.0118	0.0440308	0.0901902	ACOT11	pseudobulk	up
CTDSPL	2.0958	-0.239633	16.6419	0.00899664	0.032445	CTDSPL	pseudobulk	up
ZNF880	2.09422	0.731647	20.6054	0.00569847	0.0250219	ZNF880	pseudobulk	up
APOL6	2.09307	5.52243	92.9751	0.000168604	0.00452967	APOL6	pseudobulk	up
AVPI1	2.09295	2.30481	59.1093	0.000509446	0.00758713	AVPI1	pseudobulk	up
CTSZ	2.09021	8.28744	80.1294	0.00024307	0.00538417	CTSZ	pseudobulk	up
CHIT1	2.08222	4.36264	39.307	0.0013383	0.0120697	CHIT1	pseudobulk	up
PRKN	2.08183	3.77114	85.1645	0.000209311	0.00499635	PRKN	pseudobulk	up
STK32B	2.08155	2.91206	35.4802	0.00169656	0.0133777	STK32B	pseudobulk	up
SCO2	2.08081	6.31044	13.3909	0.0137558	0.0418835	SCO2	pseudobulk	up
FARP1	2.08044	5.23959	64.0349	0.000419693	0.00704866	FARP1	pseudobulk	up
CXCL1	2.08044	2.03539	28.5515	0.00278383	0.017242	CXCL1	pseudobulk	up
PPP1R3B	2.08036	2.3913	80.9405	0.000237273	0.0053237	PPP1R3B	pseudobulk	up
PKD1L3	2.08004	0.164608	18.0691	0.00757166	0.0293379	PKD1L3	pseudobulk	up
CD163	2.07998	7.10034	92.023	0.000172942	0.00457787	CD163	pseudobulk	up
AZI2	2.07667	4.41876	98.0074	0.000148012	0.00427458	AZI2	pseudobulk	up
TNFSF15	2.07154	2.1333	33.3005	0.0019627	0.0144446	TNFSF15	pseudobulk	up
ZNF347	2.06741	1.50911	36.3975	0.00160092	0.0130493	ZNF347	pseudobulk	up
SCN1B	2.06739	5.43959	121.282	8.7158044680948e-05	0.00336772	SCN1B	pseudobulk	up
SYTL3	2.06738	3.08494	73.4611	0.000300679	0.00609296	SYTL3	pseudobulk	up
CAST	2.06604	5.44838	131.604	7.10676503847783e-05	0.00303083	CAST	pseudobulk	up
LGALS9	2.06568	5.30844	172.657	3.59294097593122e-05	0.00228721	LGALS9	pseudobulk	up
SH3PXD2B	2.061	2.99172	68.4746	0.000356816	0.00662369	SH3PXD2B	pseudobulk	up
CHRFAM7A	2.05986	0.452193	5.3432	0.0671493	0.123093	CHRFAM7A	pseudobulk	up
KCNJ1	2.05966	-0.390132	6.10339	0.0547895	0.105923	KCNJ1	pseudobulk	up
DOK2	2.05765	3.31793	25.8927	0.00345657	0.0191137	DOK2	pseudobulk	up
SLC31A1	2.05256	3.43571	76.8787	0.000269046	0.00569052	SLC31A1	pseudobulk	up
TNK2	2.05168	6.42369	188.423	2.88167457897121e-05	0.0021367	TNK2	pseudobulk	up
BTN3A2	2.05049	3.63923	56.8176	0.000559916	0.00791379	BTN3A2	pseudobulk	up
IRF9	2.04718	5.22848	75.8337	0.000278168	0.00581996	IRF9	pseudobulk	up
STARD13	2.04587	5.63198	51.446	0.000709966	0.00877373	STARD13	pseudobulk	up
TNF	2.04572	2.37749	41.8095	0.00115932	0.0112002	TNF	pseudobulk	up
IL1B	2.04466	5.2594	23.6298	0.00422629	0.0212291	IL1B	pseudobulk	up
BCAT2	2.04453	3.84255	64.233	0.00041659	0.0070421	BCAT2	pseudobulk	up
GPD2	2.04356	3.62134	125.609	7.98623231204193e-05	0.00321668	GPD2	pseudobulk	up
TMEM37	2.04331	3.25048	24.1883	0.00401592	0.0206715	TMEM37	pseudobulk	up
PARP3	2.04133	2.61489	87.5038	0.000195872	0.00488743	PARP3	pseudobulk	up
EMP3	2.04122	3.88051	103.264	0.000130049	0.0041093	EMP3	pseudobulk	up
DCBLD1	2.04112	2.32878	62.4512	0.000446077	0.00719617	DCBLD1	pseudobulk	up
PMCH	2.03937	2.27969	8.10476	0.0346187	0.0762103	PMCH	pseudobulk	up
NPHP1	2.0391	0.967588	23.765	0.00418976	0.0210944	NPHP1	pseudobulk	up
BEX5	2.03836	-1.17299	6.96849	0.0383973	0.0819167	BEX5	pseudobulk	up
CACNA1F	2.03147	0.633898	21.8172	0.00505254	0.0234277	CACNA1F	pseudobulk	up
HERC6	2.03039	3.95814	14.1403	0.0123553	0.0391604	HERC6	pseudobulk	up
CDKN2B	2.03029	2.53192	14.9472	0.0110609	0.0366045	CDKN2B	pseudobulk	up
UNC5B	2.03023	3.34822	8.56502	0.0314569	0.071131	UNC5B	pseudobulk	up
DYRK4	2.02904	4.53496	115.663	9.81045654997043e-05	0.00357616	DYRK4	pseudobulk	up
CCER2	2.02813	1.13033	34.2792	0.00183889	0.0140009	CCER2	pseudobulk	up
SEMA4A	2.0281	1.57778	37.2879	0.00151406	0.012757	SEMA4A	pseudobulk	up
BCL3	2.02729	3.32092	109.941	0.000111321	0.00383308	BCL3	pseudobulk	up
PDGFC	2.02613	3.04619	31.8838	0.00216646	0.0150947	PDGFC	pseudobulk	up
SNX20	2.02298	3.93099	128.039	7.61251056292644e-05	0.0031378	SNX20	pseudobulk	up
CTSL	2.02179	5.93235	144.441	5.62835301168971e-05	0.00276563	CTSL	pseudobulk	up
SMPDL3A	2.02155	4.61022	15.1676	0.0107383	0.0360338	SMPDL3A	pseudobulk	up
FMNL2	2.02061	7.21557	191.72	2.75806713267622e-05	0.00211885	FMNL2	pseudobulk	up
CTSH	2.0198	6.46765	163.868	4.09841920021835e-05	0.00240921	CTSH	pseudobulk	up
OAF	2.01948	1.91307	38.6272	0.00139452	0.0122714	OAF	pseudobulk	up
RNF144A	2.01522	-1.28753	7.4024	0.0375395	0.0807202	RNF144A	pseudobulk	up
APOBR	2.01	6.69518	54.1746	0.00062756	0.00828912	APOBR	pseudobulk	up
DENND1B	2.0082	3.30733	104.999	0.000124788	0.004034	DENND1B	pseudobulk	up
SLC22A4	2.00694	-1.25713	5.94883	0.053635	0.104228	SLC22A4	pseudobulk	up
PDGFA	2.00471	3.68829	70.0985	0.000336988	0.00651285	PDGFA	pseudobulk	up
AURKC	1.99973	1.47514	49.2351	0.000789046	0.00922306	AURKC	pseudobulk	up
HSD17B14	1.99861	5.64987	48.5039	0.000816621	0.00942255	HSD17B14	pseudobulk	up
SLC25A24	1.99812	4.10015	66.534	0.000382529	0.00685698	SLC25A24	pseudobulk	up
ITGAX	1.99721	9.14059	130.362	7.27728420639028e-05	0.00305365	ITGAX	pseudobulk	up
CHPF	1.9955	0.846699	27.8363	0.00296624	0.0177322	CHPF	pseudobulk	up
CD300E	1.9946	1.41853	35.1695	0.00173311	0.0135431	CD300E	pseudobulk	up
AOC1	1.99414	-1.58639	2.09439	0.201222	0.283856	AOC1	pseudobulk	up
UNC13B	1.99406	2.21427	60.1262	0.000488913	0.00746236	UNC13B	pseudobulk	up
SLC1A3	1.99187	6.38784	53.706	0.000640732	0.00838886	SLC1A3	pseudobulk	up
TENT5A	1.98163	3.64202	122.689	8.46916034912547e-05	0.003319	TENT5A	pseudobulk	up
FAM135B	1.98132	-0.44997	7.09311	0.0426214	0.0882076	FAM135B	pseudobulk	up
B3GNT9	1.97839	-0.718119	9.96576	0.0238595	0.0593419	B3GNT9	pseudobulk	up
SPATA20	1.97741	6.14259	43.9944	0.00102825	0.010515	SPATA20	pseudobulk	up
PTER	1.97515	3.04918	86.5055	0.000201437	0.00494294	PTER	pseudobulk	up
ARMCX1	1.97234	3.35345	57.3863	0.000546695	0.00784321	ARMCX1	pseudobulk	up
CNTNAP1	1.97161	0.789695	29.974	0.00250733	0.0163235	CNTNAP1	pseudobulk	up
ELL2	1.96942	6.12405	146.002	5.4785685356993e-05	0.00274588	ELL2	pseudobulk	up
CPAMD8	1.96902	0.113892	12.0983	0.0167922	0.0476224	CPAMD8	pseudobulk	up
BICD1	1.96895	5.88912	34.3918	0.00182219	0.0139625	BICD1	pseudobulk	up
KLF6	1.96706	6.22162	164.153	4.08053290061898e-05	0.00240921	KLF6	pseudobulk	up
CRACR2A	1.96661	3.05375	48.8154	0.000804402	0.0093145	CRACR2A	pseudobulk	up
TRIP6	1.96452	5.02065	148.228	5.27446373482197e-05	0.00274588	TRIP6	pseudobulk	up
SLC16A7	1.96182	-1.0127	4.98552	0.0643892	0.11959	SLC16A7	pseudobulk	up
MROH7	1.96128	4.2886	7.15292	0.0426235	0.0882076	MROH7	pseudobulk	up
ZNF493	1.96057	3.72637	105.681	0.000122795	0.0039972	ZNF493	pseudobulk	up
TXNIP	1.96044	6.90429	56.5762	0.000565622	0.00793801	TXNIP	pseudobulk	up
FUCA1	1.95926	5.14268	37.2939	0.00151193	0.012757	FUCA1	pseudobulk	up
GALNT3	1.95821	-0.072943	16.7809	0.00882795	0.0320905	GALNT3	pseudobulk	up
C1orf162	1.95528	5.13259	154.549	4.74910950497545e-05	0.00260403	C1orf162	pseudobulk	up
CALHM6	1.95492	3.75898	72.0307	0.000315398	0.00627996	CALHM6	pseudobulk	up
ZNF568	1.94872	3.07396	6.96873	0.0444744	0.0908707	ZNF568	pseudobulk	up
PARP11	1.94358	2.81206	57.62	0.000541433	0.00780741	PARP11	pseudobulk	up
ACTRT3	1.93931	-0.376066	11.0052	0.0201916	0.0533618	ACTRT3	pseudobulk	up
LRRC34	1.93919	-0.753729	7.36109	0.0404199	0.0849414	LRRC34	pseudobulk	up
SRXN1	1.9351	3.06833	71.178	0.000324733	0.0063836	SRXN1	pseudobulk	up
HTATIP2	1.93447	4.10312	83.8312	0.000217581	0.00509837	HTATIP2	pseudobulk	up
TMEM163	1.93319	-0.0860869	13.5096	0.0136461	0.0416371	TMEM163	pseudobulk	up
MYD88	1.93246	5.23049	121.244	8.72253079819016e-05	0.00336772	MYD88	pseudobulk	up
PLSCR1	1.92991	5.76719	75.5159	0.000281034	0.00581996	PLSCR1	pseudobulk	up
AL162231.1	1.92825	-0.445726	11.6579	0.0181214	0.0499861	AL162231.1	pseudobulk	up
ZXDA	1.9278	-0.914214	7.07709	0.0427357	0.0883256	ZXDA	pseudobulk	up
CASP5	1.92545	1.2084	36.4945	0.00159251	0.0130451	CASP5	pseudobulk	up
ZNF483	1.92443	1.4929	41.7405	0.00116457	0.0112002	ZNF483	pseudobulk	up
DHX58	1.9234	4.83793	55.2809	0.000597923	0.00809463	DHX58	pseudobulk	up
ABCC5	1.9232	6.96827	65.8522	0.000392187	0.00693015	ABCC5	pseudobulk	up
NR5A1	1.92129	1.63735	44.1091	0.00103391	0.0105246	NR5A1	pseudobulk	up
CATSPERE	1.92074	-0.347522	13.3255	0.0140077	0.0423766	CATSPERE	pseudobulk	up
NCEH1	1.91958	3.65163	27.0469	0.00313746	0.0182973	NCEH1	pseudobulk	up
ZNF154	1.91889	0.150948	8.38063	0.032555	0.0729344	ZNF154	pseudobulk	up
SCART1	1.91565	1.98199	49.0205	0.000796709	0.00925652	SCART1	pseudobulk	up
HOMER2	1.91201	-0.38947	8.85517	0.0298369	0.0687164	HOMER2	pseudobulk	up
ZNF69	1.91109	2.39097	40.4419	0.00125274	0.0116294	ZNF69	pseudobulk	up
SPN	1.90677	3.79761	65.3908	0.000398949	0.00696788	SPN	pseudobulk	up
KYNU	1.90458	4.90399	118.541	9.22746728465611e-05	0.0034911	KYNU	pseudobulk	up
CUBN	1.90376	0.339963	14.4605	0.0118902	0.0382519	CUBN	pseudobulk	up
C5AR1	1.90033	3.96692	32.3938	0.00208949	0.0148518	C5AR1	pseudobulk	up
CLBA1	1.89936	0.838478	19.8511	0.00616307	0.0261279	CLBA1	pseudobulk	up
SKOR1	1.89751	0.470597	14.6997	0.0114638	0.0374086	SKOR1	pseudobulk	up
ACAP1	1.89701	1.14336	8.75056	0.0303344	0.0694499	ACAP1	pseudobulk	up
TG	1.89677	-1.3643	2.6762	0.157351	0.234169	TG	pseudobulk	up
NEUROG3	1.89664	-1.62984	2.17688	0.19093	0.272369	NEUROG3	pseudobulk	up
RBM43	1.89649	2.68646	71.1717	0.000324805	0.0063836	RBM43	pseudobulk	up
DDX60	1.8959	3.18331	18.6236	0.00703901	0.0282028	DDX60	pseudobulk	up
DDX58	1.89553	4.69549	33.4631	0.00194014	0.0143568	DDX58	pseudobulk	up
FBXO32	1.89437	0.45438	16.1519	0.00951427	0.0335843	FBXO32	pseudobulk	up
TRMO	1.89137	4.0837	110.309	0.000110387	0.003811	TRMO	pseudobulk	up
TUBA1C	1.8906	2.01501	53.1937	0.000656186	0.00846517	TUBA1C	pseudobulk	up
ITGA7	1.88975	-0.788913	10.3136	0.0225796	0.0573824	ITGA7	pseudobulk	up
ANPEP	1.88926	-0.863355	7.39761	0.0331365	0.0739198	ANPEP	pseudobulk	up
DIPK1A	1.88873	0.849967	21.4267	0.00524271	0.0239198	DIPK1A	pseudobulk	up
AMZ1	1.8847	-1.54514	1.19587	0.313784	0.404753	AMZ1	pseudobulk	up
CLEC4A	1.88341	4.71206	102.872	0.000131275	0.00411749	CLEC4A	pseudobulk	up
PML	1.88062	5.24169	69.0881	0.000349082	0.00658446	PML	pseudobulk	up
FHAD1	1.87869	3.74463	32.8741	0.00202054	0.0146165	FHAD1	pseudobulk	up
FTCDNL1	1.87789	2.50918	31.2897	0.00226134	0.0155319	FTCDNL1	pseudobulk	up
CIB1	1.8776	4.40811	100.213	0.000140077	0.00418138	CIB1	pseudobulk	up
TNFAIP8	1.87584	2.63658	75.0509	0.000285374	0.00586477	TNFAIP8	pseudobulk	up
FLT1	1.87238	-1.67898	1.61382	0.246768	0.333989	FLT1	pseudobulk	up
MAP4K1	1.87085	4.19888	81.0195	0.000236583	0.00532312	MAP4K1	pseudobulk	up
FGD5	1.86931	3.17529	13.3098	0.013921	0.0422453	FGD5	pseudobulk	up
BTBD19	1.8689	3.51683	97.8217	0.000148717	0.00428327	BTBD19	pseudobulk	up
MINAR1	1.86773	0.0565059	17.0101	0.00856346	0.0315598	MINAR1	pseudobulk	up
NPC2	1.86407	6.93085	40.7074	0.00123342	0.0115137	NPC2	pseudobulk	up
RMDN3	1.86336	4.91201	96.1851	0.000155042	0.00436999	RMDN3	pseudobulk	up
AP1S3	1.86096	1.90194	52.743	0.000669451	0.00853726	AP1S3	pseudobulk	up
MUC20	1.85744	3.56081	45.4825	0.000950809	0.0100735	MUC20	pseudobulk	up
AXL	1.85708	6.7631	51.2209	0.000717411	0.00880815	AXL	pseudobulk	up
PRDX1	1.85554	3.27861	18.3909	0.00722695	0.028614	PRDX1	pseudobulk	up
IL20RB	1.85413	0.801252	28.3517	0.00283078	0.0173487	IL20RB	pseudobulk	up
VCAN	1.84646	-1.55713	1.67706	0.245063	0.332061	VCAN	pseudobulk	up
AKR1B1	1.84096	6.41005	100.447	0.000139266	0.00417638	AKR1B1	pseudobulk	up
AC011195.2	1.83912	-1.22972	5.73189	0.0579282	0.11044	AC011195.2	pseudobulk	up
PLAAT3	1.83789	3.81435	112.326	0.000105524	0.00373502	PLAAT3	pseudobulk	up
UBXN11	1.83455	5.11602	124.332	8.19172940970544e-05	0.00325921	UBXN11	pseudobulk	up
STAT2	1.83363	6.72221	96.4841	0.000153855	0.0043459	STAT2	pseudobulk	up
S100A11	1.8332	6.0675	146.323	5.44847942002663e-05	0.00274588	S100A11	pseudobulk	up
SFI1	1.82979	4.49862	41.737	0.0011635	0.0112002	SFI1	pseudobulk	up
INCA1	1.8296	0.230805	19.8855	0.00616459	0.0261279	INCA1	pseudobulk	up
MAP3K21	1.82654	2.22145	57.3961	0.00054662	0.00784321	MAP3K21	pseudobulk	up
IRF1	1.82598	4.29878	76.8982	0.000268852	0.00569052	IRF1	pseudobulk	up
KLHL6	1.82558	6.40036	46.3668	0.000908524	0.00988752	KLHL6	pseudobulk	up
ERMN	1.82397	1.67965	38.1467	0.00143558	0.0124239	ERMN	pseudobulk	up
HSPB1	1.82122	5.2613	20.8969	0.00551345	0.0245608	HSPB1	pseudobulk	up
GBP5	1.8203	2.59653	2.70874	0.158767	0.2359	GBP5	pseudobulk	up
FMO4	1.81806	0.777318	25.7546	0.00351006	0.0192221	FMO4	pseudobulk	up
RNH1	1.81799	5.56364	78.0109	0.000259559	0.00557113	RNH1	pseudobulk	up
PSAP	1.81537	9.04765	22.3281	0.00478045	0.0226032	PSAP	pseudobulk	up
SLC26A11	1.81026	5.56347	48.3588	0.000822442	0.00943963	SLC26A11	pseudobulk	up
TRDMT1	1.80744	1.90563	33.4301	0.00194537	0.0143674	TRDMT1	pseudobulk	up
CRYL1	1.8067	4.23539	48.0985	0.000833051	0.00949068	CRYL1	pseudobulk	up
RARG	1.80663	-0.160055	10.5321	0.021849	0.0560948	RARG	pseudobulk	up
IFIT5	1.80464	3.33408	86.2119	0.000203116	0.00494413	IFIT5	pseudobulk	up
DDX60L	1.80337	5.55934	26.9798	0.00315473	0.0183541	DDX60L	pseudobulk	up
CLEC10A	1.80294	0.2982	7.79051	0.0371359	0.080103	CLEC10A	pseudobulk	up
CARD16	1.80281	0.83878	14.9199	0.0111202	0.0366738	CARD16	pseudobulk	up
LAG3	1.8021	1.6601	40.5132	0.00124824	0.0116022	LAG3	pseudobulk	up
HACD4	1.80128	3.0538	84.1558	0.000215546	0.00509579	HACD4	pseudobulk	up
LANCL2	1.80045	2.48664	49.531	0.000777159	0.00913687	LANCL2	pseudobulk	up
GFAP	1.79785	9.61231	73.6586	0.000298652	0.00606336	GFAP	pseudobulk	up
GLIPR2	1.79677	1.55638	43.4921	0.00105713	0.0106694	GLIPR2	pseudobulk	up
STX2	1.79537	5.21459	40.9445	0.00121682	0.0114406	STX2	pseudobulk	up
S100A6	1.79459	6.37265	56.0732	0.000577868	0.00796118	S100A6	pseudobulk	up
SIGLEC9	1.79452	5.28777	62.4366	0.00044614	0.00719617	SIGLEC9	pseudobulk	up
YBX3	1.79275	5.05992	125.767	7.96050907087088e-05	0.00321624	YBX3	pseudobulk	up
ALDH8A1	1.79041	-0.624831	8.06053	0.0350308	0.0768195	ALDH8A1	pseudobulk	up
UPP1	1.78821	4.04747	92.5297	0.000170621	0.00455339	UPP1	pseudobulk	up
HIVEP2	1.78662	0.245449	9.43934	0.0266563	0.0638233	HIVEP2	pseudobulk	up
ZBED3	1.78651	3.26804	11.5441	0.018305	0.0503012	ZBED3	pseudobulk	up
IFITM2	1.78478	2.29348	59.1437	0.000508585	0.00758713	IFITM2	pseudobulk	up
FABP3	1.78454	4.80857	45.2065	0.000964531	0.0101755	FABP3	pseudobulk	up
SECTM1	1.78431	2.91952	77.094	0.000267229	0.00567047	SECTM1	pseudobulk	up
EVI2B	1.78302	5.13771	66.9335	0.000377003	0.00681436	EVI2B	pseudobulk	up
OSM	1.78104	2.65261	52.1675	0.000686976	0.00863684	OSM	pseudobulk	up
GNS	1.78095	5.03649	40.8842	0.00122102	0.0114553	GNS	pseudobulk	up
DUSP2	1.78063	1.82645	42.3737	0.00112397	0.01107	DUSP2	pseudobulk	up
PFKP	1.78024	1.36263	29.0695	0.00267581	0.0169019	PFKP	pseudobulk	up
LAP3	1.7795	5.45831	27.2695	0.00308053	0.0181248	LAP3	pseudobulk	up
CORO1C	1.77752	5.88695	86.3872	0.000202084	0.00494413	CORO1C	pseudobulk	up
CEACAM19	1.77624	1.14483	31.3157	0.00225983	0.0155319	CEACAM19	pseudobulk	up
GDF5	1.77566	-1.47567	0.534312	0.503734	0.589836	GDF5	pseudobulk	up
AKAP7	1.77498	2.99873	63.2494	0.000432454	0.00714371	AKAP7	pseudobulk	up
SLC26A3	1.77363	-1.06117	6.72875	0.0470439	0.0946243	SLC26A3	pseudobulk	up
FCER1G	1.77101	6.45006	143.462	5.7252288964356e-05	0.00278314	FCER1G	pseudobulk	up
THEMIS2	1.76812	6.35278	136.281	6.5117827359376e-05	0.00291023	THEMIS2	pseudobulk	up
GSTZ1	1.7672	1.4854	20.9902	0.00546362	0.0244934	GSTZ1	pseudobulk	up
SLC20A2	1.76551	2.5845	59.9826	0.000491544	0.00747628	SLC20A2	pseudobulk	up
LRRC6	1.76188	1.49584	24.803	0.0038029	0.0200355	LRRC6	pseudobulk	up
DTX3L	1.76138	4.90475	74.3902	0.000291538	0.00595394	DTX3L	pseudobulk	up
SPATA7	1.76025	3.42869	82.0773	0.000229183	0.00527542	SPATA7	pseudobulk	up
CXCL16	1.75903	6.11501	77.9435	0.000260109	0.00557375	CXCL16	pseudobulk	up
SLC46A3	1.75865	3.1037	80.7923	0.000238241	0.0053237	SLC46A3	pseudobulk	up
FAM47E	1.75724	-1.34022	4.12251	0.0946645	0.158219	FAM47E	pseudobulk	up
SLC49A3	1.75703	4.87155	124.585	8.15051747846554e-05	0.00325347	SLC49A3	pseudobulk	up
SGK1	1.7554	7.56665	124.572	8.15238408531362e-05	0.00325347	SGK1	pseudobulk	up
IQSEC1	1.75471	6.47024	42.4866	0.00111597	0.0110329	IQSEC1	pseudobulk	up
CDKN1A	1.75418	3.6256	87.7492	0.000194467	0.00486167	CDKN1A	pseudobulk	up
TSNARE1	1.75327	5.22338	70.9722	0.000326959	0.00639703	TSNARE1	pseudobulk	up
GPR141	1.75248	3.44278	46.0111	0.000925268	0.00994052	GPR141	pseudobulk	up
LRRC27	1.74968	3.47887	22.9268	0.00451397	0.0219721	LRRC27	pseudobulk	up
TSHZ3	1.74872	2.77169	59.6404	0.00049839	0.00751906	TSHZ3	pseudobulk	up
REELD1	1.74269	-1.4727	2.31414	0.185161	0.26603	REELD1	pseudobulk	up
TMEM54	1.74268	-0.97936	2.37879	0.180096	0.260128	TMEM54	pseudobulk	up
IQCK	1.74262	3.41587	69.6622	0.000342156	0.00654712	IQCK	pseudobulk	up
PMAIP1	1.74228	1.94679	37.3731	0.00150545	0.0127242	PMAIP1	pseudobulk	up
SLC35F3	1.74032	-0.97386	4.72921	0.0715446	0.128426	SLC35F3	pseudobulk	up
FCGBP	1.74019	8.67115	10.8088	0.0207062	0.0541516	FCGBP	pseudobulk	up
HTR7	1.73963	2.60321	29.087	0.00266647	0.0168878	HTR7	pseudobulk	up
TMEM51	1.73797	4.90548	65.1211	0.00040295	0.0069848	TMEM51	pseudobulk	up
ZRSR2	1.7374	4.55822	90.623	0.000179611	0.00467849	ZRSR2	pseudobulk	up
GSTO1	1.73689	2.68778	65.0062	0.000404748	0.0069848	GSTO1	pseudobulk	up
HNMT	1.73638	4.96008	62.0675	0.000452575	0.00719617	HNMT	pseudobulk	up
CAPN5	1.73629	0.980915	29.55	0.00257637	0.0165731	CAPN5	pseudobulk	up
GRN	1.73607	6.70126	53.2386	0.000654254	0.00846186	GRN	pseudobulk	up
CXCL8	1.73355	3.46934	66.9911	0.000376369	0.00681436	CXCL8	pseudobulk	up
DMXL2	1.73155	5.23662	60.8648	0.000474453	0.00734474	DMXL2	pseudobulk	up
CDC25B	1.73097	4.84582	99.8581	0.000141312	0.00419119	CDC25B	pseudobulk	up
ARMC9	1.73	2.38385	56.6875	0.000563155	0.007936	ARMC9	pseudobulk	up
TRMT5	1.7293	2.54512	64.0073	0.000420219	0.00704866	TRMT5	pseudobulk	up
MAPK13	1.72823	4.6473	56.8924	0.00055812	0.00791087	MAPK13	pseudobulk	up
CD68	1.72654	7.85834	38.7777	0.00138113	0.0122336	CD68	pseudobulk	up
SPARCL1	1.72508	0.0775733	12.4925	0.0158837	0.0458836	SPARCL1	pseudobulk	up
DZIP1L	1.72501	4.90047	38.9673	0.00136558	0.0121814	DZIP1L	pseudobulk	up
LCP2	1.72353	6.85895	130.831	7.21226358549044e-05	0.00305075	LCP2	pseudobulk	up
RPGRIP1	1.72048	-1.18587	4.87915	0.0739202	0.131586	RPGRIP1	pseudobulk	up
GSAP	1.72029	4.8785	97.2465	0.000150893	0.00430278	GSAP	pseudobulk	up
DNAJC15	1.72019	3.42271	13.9372	0.0127147	0.0399437	DNAJC15	pseudobulk	up
CYP2E1	1.72002	0.189253	16.0436	0.0096319	0.0338074	CYP2E1	pseudobulk	up
ARHGAP24	1.71742	4.90438	113.719	0.000102331	0.00363906	ARHGAP24	pseudobulk	up
SERPINB8	1.71676	2.54864	53.2836	0.00065308	0.0084565	SERPINB8	pseudobulk	up
PLP2	1.7162	1.55614	32.5813	0.00206371	0.014765	PLP2	pseudobulk	up
OLR1	1.71616	7.07236	37.1755	0.00152306	0.0127902	OLR1	pseudobulk	up
CTSS	1.71426	6.56255	41.0724	0.00120798	0.0114081	CTSS	pseudobulk	up
MS4A7	1.71361	8.46807	61.7266	0.000458627	0.00724504	MS4A7	pseudobulk	up
TXNRD3	1.71319	2.45372	52.6349	0.000672446	0.00854554	TXNRD3	pseudobulk	up
PRKCH	1.71261	2.81842	69.1591	0.00034826	0.00658446	PRKCH	pseudobulk	up
PDE8A	1.71151	5.41857	96.9616	0.000151988	0.00430723	PDE8A	pseudobulk	up
NENF	1.71126	4.29078	65.1706	0.000402211	0.0069848	NENF	pseudobulk	up
CAPS2	1.71084	-0.525122	5.71108	0.060977	0.114711	CAPS2	pseudobulk	up
IL15RA	1.71012	1.72477	27.9041	0.00292809	0.0176333	IL15RA	pseudobulk	up
TTLL13P	1.70786	-0.210353	4.95233	0.0750626	0.133184	TTLL13P	pseudobulk	up
ACER3	1.70785	2.88003	54.0469	0.000631186	0.00832859	ACER3	pseudobulk	up
PRG2	1.70688	0.866991	14.4569	0.0119112	0.0382859	PRG2	pseudobulk	up
SORBS1	1.70656	-1.57505	2.42435	0.170138	0.249012	SORBS1	pseudobulk	up
HMGN4	1.70595	4.44709	93.9759	0.000164209	0.0044901	HMGN4	pseudobulk	up
CASP4	1.70324	4.31502	93.378	0.000166818	0.00452468	CASP4	pseudobulk	up
RCC1	1.69975	2.89609	29.9978	0.0024874	0.0162384	RCC1	pseudobulk	up
ZCWPW2	1.69901	1.30256	17.3004	0.00821301	0.030852	ZCWPW2	pseudobulk	up
NIBAN2	1.69746	2.04636	20.4317	0.0057868	0.0251885	NIBAN2	pseudobulk	up
ZNF837	1.69721	-0.587259	5.77502	0.0599435	0.113224	ZNF837	pseudobulk	up
RASSF4	1.69431	7.35718	98.5472	0.000146008	0.00424367	RASSF4	pseudobulk	up
AIFM3	1.69374	4.07937	67.9285	0.000363748	0.00668579	AIFM3	pseudobulk	up
CD244	1.69309	0.898205	21.453	0.00523596	0.0239198	CD244	pseudobulk	up
MARCO	1.69214	0.0704999	8.12988	0.0345247	0.0760686	MARCO	pseudobulk	up
CARHSP1	1.68889	2.4563	45.8498	0.000933132	0.00997816	CARHSP1	pseudobulk	up
NMT2	1.68786	2.92959	61.8223	0.00045697	0.00723341	NMT2	pseudobulk	up
ZNF433	1.68617	-0.587227	8.54476	0.0317271	0.0716081	ZNF433	pseudobulk	up
YWHAZ	1.68572	4.8678	67.8295	0.000365033	0.00668658	YWHAZ	pseudobulk	up
ZSCAN5A	1.68547	1.4151	19.9225	0.00610739	0.0259783	ZSCAN5A	pseudobulk	up
PCK2	1.68246	4.13948	87.761	0.000194392	0.00486167	PCK2	pseudobulk	up
LTA4H	1.68093	5.98073	81.411	0.000233794	0.00528838	LTA4H	pseudobulk	up
TSPYL5	1.67972	1.97893	6.6488	0.0479695	0.0959978	TSPYL5	pseudobulk	up
PPARGC1B	1.67924	4.78891	68.6627	0.000354362	0.00660917	PPARGC1B	pseudobulk	up
HMOX1	1.67862	7.11086	102.473	0.000132541	0.00412109	HMOX1	pseudobulk	up
CYTIP	1.67832	4.33319	94.5828	0.000161618	0.00445902	CYTIP	pseudobulk	up
CCDC32	1.67823	4.1762	93.9969	0.000164118	0.0044901	CCDC32	pseudobulk	up
C5	1.6779	1.67023	30.3983	0.00241535	0.0160246	C5	pseudobulk	up
ATG7	1.67785	6.5249	63.6327	0.000426134	0.00712042	ATG7	pseudobulk	up
MC1R	1.67774	-0.416018	6.93935	0.0450177	0.0916506	MC1R	pseudobulk	up
FAM234B	1.67539	2.7162	65.0807	0.000403618	0.0069848	FAM234B	pseudobulk	up
SOWAHC	1.67513	1.90048	22.6481	0.0046365	0.0222601	SOWAHC	pseudobulk	up
PHLDA1	1.67333	0.960926	10.3578	0.0224209	0.0571471	PHLDA1	pseudobulk	up
ST6GALNAC3	1.67306	-0.911501	6.77045	0.0465741	0.0939835	ST6GALNAC3	pseudobulk	up
PRXL2C	1.66967	2.43395	56.3462	0.000571304	0.00796118	PRXL2C	pseudobulk	up
TMEM44	1.66884	2.32183	43.1604	0.00107584	0.0107749	TMEM44	pseudobulk	up
ZSCAN18	1.66371	1.64609	37.1903	0.00152268	0.0127902	ZSCAN18	pseudobulk	up
SLC11A1	1.66255	6.63369	95.8643	0.000156326	0.00438721	SLC11A1	pseudobulk	up
TRERF1	1.66175	3.81189	89.2628	0.000186439	0.00475841	TRERF1	pseudobulk	up
TTLL4	1.66131	4.12307	42.3731	0.00112302	0.011069	TTLL4	pseudobulk	up
ARG2	1.6603	-0.260332	10.911	0.0205073	0.0539014	ARG2	pseudobulk	up
ANTXR2	1.65571	2.2133	46.994	0.000880434	0.00980126	ANTXR2	pseudobulk	up
ECHDC3	1.65525	1.82103	43.518	0.00105532	0.0106677	ECHDC3	pseudobulk	up
ANKDD1A	1.65522	3.0262	50.4902	0.000742445	0.00895463	ANKDD1A	pseudobulk	up
PCDHGA8	1.6549	-0.191161	8.54628	0.0315589	0.0712778	PCDHGA8	pseudobulk	up
LEPR	1.65442	0.719944	21.2898	0.00531043	0.0240629	LEPR	pseudobulk	up
EFR3A	1.65414	5.24883	116.081	9.72214910226772e-05	0.00357449	EFR3A	pseudobulk	up
ETV5	1.65348	6.53484	66.5837	0.000381821	0.00685698	ETV5	pseudobulk	up
TGFBR1	1.65223	6.33481	77.4268	0.000264376	0.00562824	TGFBR1	pseudobulk	up
TKTL2	1.65141	-0.401131	3.75665	0.108587	0.175379	TKTL2	pseudobulk	up
IGSF8	1.65008	2.90625	62.2288	0.000449799	0.00719617	IGSF8	pseudobulk	up
TES	1.64821	3.39628	51.9433	0.000693914	0.00865734	TES	pseudobulk	up
PLEC	1.6474	6.62725	63.8657	0.000422383	0.00706679	PLEC	pseudobulk	up
ATP10A	1.64498	2.23029	24.2614	0.00399033	0.0205744	ATP10A	pseudobulk	up
HORMAD1	1.64289	2.00712	27.7083	0.00297401	0.017747	HORMAD1	pseudobulk	up
LRRFIP1	1.64242	4.55047	81.7004	0.000231774	0.00528838	LRRFIP1	pseudobulk	up
CCDC24	1.64044	2.92952	68.3535	0.000358308	0.00663411	CCDC24	pseudobulk	up
SHFL	1.63648	5.82193	49.6685	0.000771903	0.00912439	SHFL	pseudobulk	up
CCDC62	1.63459	0.604501	20.4162	0.00580636	0.0252156	CCDC62	pseudobulk	up
CLEC4G	1.63367	-0.151359	8.73074	0.0306174	0.0697554	CLEC4G	pseudobulk	up
GM2A	1.63349	5.73053	15.1613	0.0107472	0.0360395	GM2A	pseudobulk	up
PID1	1.63278	1.72372	25.1857	0.00367567	0.0196911	PID1	pseudobulk	up
CLMP	1.63235	-1.21958	4.28776	0.0893589	0.151466	CLMP	pseudobulk	up
MYCBPAP	1.63222	0.395607	7.18289	0.0424241	0.087962	MYCBPAP	pseudobulk	up
OTOF	1.63169	3.86323	11.6492	0.0179935	0.0497911	OTOF	pseudobulk	up
AHI1	1.63102	3.59201	18.2821	0.0073171	0.0288161	AHI1	pseudobulk	up
FCHO1	1.63045	4.3485	54.6907	0.000613498	0.00822542	FCHO1	pseudobulk	up
SLC19A2	1.62738	1.04693	27.6812	0.00298175	0.0177716	SLC19A2	pseudobulk	up
CCDC89	1.62666	0.146066	12.3388	0.0162393	0.046606	CCDC89	pseudobulk	up
RHOC	1.62624	4.98656	53.5338	0.000645676	0.00843905	RHOC	pseudobulk	up
BMF	1.62482	5.79935	24.4524	0.00392112	0.0203816	BMF	pseudobulk	up
NT5DC3	1.62454	0.387003	17.0499	0.00850211	0.0314147	NT5DC3	pseudobulk	up
IDNK	1.62414	2.65318	31.0946	0.0022934	0.0156262	IDNK	pseudobulk	up
FSD1L	1.62404	1.32936	25.5714	0.00355501	0.0193714	FSD1L	pseudobulk	up
KCNAB2	1.62166	5.96508	63.113	0.000434668	0.00716854	KCNAB2	pseudobulk	up
F8	1.6202	0.422593	16.7806	0.00876961	0.0319764	F8	pseudobulk	up
FERMT3	1.61845	5.99131	117.379	9.45644333352612e-05	0.00355639	FERMT3	pseudobulk	up
AGBL2	1.61827	-1.26419	4.93474	0.0747475	0.132747	AGBL2	pseudobulk	up
NEK11	1.61611	1.56313	33.4758	0.00193949	0.0143568	NEK11	pseudobulk	up
CETP	1.61558	1.02728	10.2155	0.0230291	0.0580285	CETP	pseudobulk	up
TANK	1.61458	4.75226	83.7702	0.000217963	0.00509837	TANK	pseudobulk	up
PDE6B	1.61291	4.36541	91.0858	0.00017737	0.00465763	PDE6B	pseudobulk	up
PHETA2	1.61164	2.01246	41.3565	0.00118909	0.011315	PHETA2	pseudobulk	up
NR4A3	1.61156	0.0634863	9.22075	0.0275115	0.0650228	NR4A3	pseudobulk	up
TEX12	1.61154	-1.06466	5.13255	0.0705733	0.127124	TEX12	pseudobulk	up
PLXNA1	1.60606	4.53152	97.9958	0.000148054	0.00427458	PLXNA1	pseudobulk	up
SLC4A5	1.60586	0.0278525	14.277	0.0121782	0.0388021	SLC4A5	pseudobulk	up
CCDC107	1.60477	2.95049	62.5214	0.000444723	0.00719617	CCDC107	pseudobulk	up
NBPF19	1.60163	-0.778403	3.67269	0.111716	0.179081	NBPF19	pseudobulk	up
HEATR3	1.60158	4.02253	81.4706	0.000233384	0.00528838	HEATR3	pseudobulk	up
TARBP1	1.60073	4.32819	80.5256	0.000240156	0.00533606	TARBP1	pseudobulk	up
AGA	1.59953	3.44472	40.4231	0.00125383	0.0116294	AGA	pseudobulk	up
SERPINA1	1.59812	5.86308	94.6006	0.000161538	0.00445902	SERPINA1	pseudobulk	up
JPT1	1.59732	3.75045	62.1003	0.000452015	0.00719617	JPT1	pseudobulk	up
AFAP1L1	1.597	1.16606	23.2572	0.00438027	0.0216361	AFAP1L1	pseudobulk	up
PTCH2	1.59697	0.734558	24.9375	0.0037594	0.0198866	PTCH2	pseudobulk	up
CRTAP	1.59363	5.51286	86.7021	0.000200283	0.00494294	CRTAP	pseudobulk	up
TRIM25	1.59298	5.18641	51.1186	0.000720837	0.0088411	TRIM25	pseudobulk	up
FAM20C	1.59188	4.93752	8.82889	0.0298349	0.0687164	FAM20C	pseudobulk	up
PPDPF	1.59172	2.76516	35.3253	0.00171365	0.0134442	PPDPF	pseudobulk	up
WWC3	1.59151	3.31803	67.9569	0.000363393	0.00668579	WWC3	pseudobulk	up
ZNF43	1.59143	0.836603	14.2507	0.0121788	0.0388021	ZNF43	pseudobulk	up
GPD1	1.58754	-0.337342	3.74098	0.109226	0.176193	GPD1	pseudobulk	up
ARMCX2	1.58602	3.92044	87.8744	0.000193776	0.00486167	ARMCX2	pseudobulk	up
GALC	1.58589	3.6944	65.2885	0.000400464	0.00697737	GALC	pseudobulk	up
AGAP3	1.5857	4.02523	75.6484	0.000279843	0.00581996	AGAP3	pseudobulk	up
DOK3	1.58473	5.37945	84.726	0.000211968	0.00502941	DOK3	pseudobulk	up
SLC3A2	1.58362	5.32941	80.538	0.000240058	0.00533606	SLC3A2	pseudobulk	up
FXYD2	1.58356	0.148964	13.9306	0.0127925	0.040063	FXYD2	pseudobulk	up
CDKN1C	1.58321	1.45917	21.4617	0.00520975	0.0238552	CDKN1C	pseudobulk	up
CCNE1	1.58256	1.04335	28.7376	0.00274149	0.0171672	CCNE1	pseudobulk	up
ZNF572	1.58238	1.18471	19.8003	0.00618829	0.0261943	ZNF572	pseudobulk	up
MOSPD2	1.58074	4.89093	8.29285	0.0332603	0.074082	MOSPD2	pseudobulk	up
ACVR1B	1.58069	3.81159	81.8265	0.000230903	0.00528647	ACVR1B	pseudobulk	up
CCT6B	1.57914	1.17405	26.6436	0.00324724	0.0185536	CCT6B	pseudobulk	up
PLIN1	1.57886	-0.510186	6.68234	0.0474298	0.0950928	PLIN1	pseudobulk	up
TNS1	1.57858	3.93817	75.5841	0.000280423	0.00581996	TNS1	pseudobulk	up
F11R	1.57758	4.17174	45.8556	0.000932648	0.00997816	F11R	pseudobulk	up
CCDC154	1.57593	3.91068	60.0206	0.000490717	0.00747242	CCDC154	pseudobulk	up
PLEKHA5	1.57477	2.43024	22.6812	0.00462126	0.0222127	PLEKHA5	pseudobulk	up
UNC5CL	1.57465	0.943188	22.3345	0.00478322	0.0226081	UNC5CL	pseudobulk	up
OSCAR	1.57417	5.08901	66.5468	0.000382336	0.00685698	OSCAR	pseudobulk	up
USP50	1.57378	-0.80149	5.03166	0.0733241	0.130846	USP50	pseudobulk	up
WDR31	1.57294	-0.801963	4.16582	0.0950108	0.158594	WDR31	pseudobulk	up
LAMP3	1.57266	-0.389397	6.64698	0.0479969	0.096038	LAMP3	pseudobulk	up
TOR3A	1.57258	3.36968	38.1372	0.00143566	0.0124239	TOR3A	pseudobulk	up
UPK3B	1.57191	1.94542	39.2905	0.00134006	0.0120772	UPK3B	pseudobulk	up
AASS	1.57092	0.14113	4.0105	0.0999061	0.165014	AASS	pseudobulk	up
ABCA3	1.56921	0.946899	20.9402	0.00550059	0.0245608	ABCA3	pseudobulk	up
SORBS3	1.56655	6.16383	39.4684	0.00132557	0.0120191	SORBS3	pseudobulk	up
KLF11	1.56562	2.89397	26.3721	0.00331886	0.0187413	KLF11	pseudobulk	up
PIGW	1.565	0.97978	20.6004	0.005691	0.0250219	PIGW	pseudobulk	up
GALE	1.56145	3.83555	55.2577	0.000598538	0.00809463	GALE	pseudobulk	up
P2RY11	1.56087	4.56207	93.5895	0.000165888	0.00451007	P2RY11	pseudobulk	up
CLN8	1.56065	5.13913	57.7074	0.000539365	0.00780706	CLN8	pseudobulk	up
AC118549.1	1.55935	4.75884	67.3372	0.000371545	0.00675301	AC118549.1	pseudobulk	up
PRSS27	1.55645	0.146872	14.0892	0.0124908	0.0394685	PRSS27	pseudobulk	up
KLHL42	1.55638	3.25135	64.4797	0.00041275	0.00703826	KLHL42	pseudobulk	up
CALCR	1.55559	-0.447139	6.2109	0.0535816	0.104193	CALCR	pseudobulk	up
ENTPD5	1.55443	2.67194	55.5267	0.000591685	0.00808082	ENTPD5	pseudobulk	up
PTPRO	1.55359	4.29383	83.2482	0.000221338	0.00514877	PTPRO	pseudobulk	up
ALOX5	1.55295	6.58482	105.981	0.000121922	0.0039972	ALOX5	pseudobulk	up
DHRS7	1.55284	3.73499	49.9529	0.000761539	0.00905933	DHRS7	pseudobulk	up
USP43	1.55206	0.92062	22.4447	0.00473304	0.0224749	USP43	pseudobulk	up
ANKRD24	1.55156	2.13318	32.3162	0.00210134	0.0148856	ANKRD24	pseudobulk	up
CXCL2	1.5508	-0.406241	5.30469	0.0599958	0.113257	CXCL2	pseudobulk	up
FKBP5	1.55067	2.84958	54.3275	0.00062341	0.00828364	FKBP5	pseudobulk	up
TAL2	1.54957	-1.1831	3.86838	0.104327	0.170184	TAL2	pseudobulk	up
C3AR1	1.54758	4.83654	43.2173	0.00107223	0.010747	C3AR1	pseudobulk	up
FCMR	1.54729	1.31876	18.1017	0.0074946	0.0292216	FCMR	pseudobulk	up
BST2	1.54681	6.73635	101.498	0.000135721	0.00413626	BST2	pseudobulk	up
ZYX	1.54606	6.01211	15.8718	0.00979546	0.0340156	ZYX	pseudobulk	up
DNASE2	1.54545	5.69329	26.6047	0.0032545	0.0185714	DNASE2	pseudobulk	up
SPR	1.54465	2.17885	11.1876	0.0194201	0.0520716	SPR	pseudobulk	up
ICA1L	1.54389	0.933972	23.2084	0.00439963	0.0216907	ICA1L	pseudobulk	up
STK32C	1.54381	3.53304	59.225	0.000506753	0.00758195	STK32C	pseudobulk	up
RAB20	1.54374	4.91048	40.2115	0.00126922	0.0117304	RAB20	pseudobulk	up
RNF112	1.54345	-0.686317	6.71708	0.0473098	0.094969	RNF112	pseudobulk	up
MYL12A	1.54307	0.822613	14.7545	0.0113598	0.0372195	MYL12A	pseudobulk	up
EMILIN1	1.54273	1.01356	17.1686	0.00835448	0.0311114	EMILIN1	pseudobulk	up
CTXN3	1.54266	1.30671	20.7815	0.00560346	0.0248303	CTXN3	pseudobulk	up
MS4A6A	1.54162	8.1518	97.6529	0.00014934	0.00428327	MS4A6A	pseudobulk	up
HEXA	1.54115	7.20147	110.772	0.000109238	0.00379195	HEXA	pseudobulk	up
LGMN	1.54067	7.37273	89.5392	0.000185014	0.00473419	LGMN	pseudobulk	up
SERINC5	1.54066	4.05965	57.1601	0.000551872	0.00786237	SERINC5	pseudobulk	up
SOAT1	1.54	4.20908	70.1523	0.000336348	0.00651238	SOAT1	pseudobulk	up
SLC46A1	1.53902	3.81617	47.4388	0.000860757	0.00969764	SLC46A1	pseudobulk	up
ZC3H12C	1.53772	4.49532	28.7046	0.00274663	0.0171774	ZC3H12C	pseudobulk	up
LRRC20	1.53683	0.787668	17.9771	0.00759149	0.0293799	LRRC20	pseudobulk	up
KCNMB1	1.53519	4.76712	85.8925	0.000204964	0.00494413	KCNMB1	pseudobulk	up
TALDO1	1.53403	5.36639	30.6049	0.0023771	0.0158676	TALDO1	pseudobulk	up
VPS9D1	1.53391	5.31152	37.5461	0.0014885	0.012661	VPS9D1	pseudobulk	up
P4HA2	1.53327	1.08382	16.9576	0.00856193	0.0315598	P4HA2	pseudobulk	up
TMSB10	1.53197	7.96956	60.4293	0.000482738	0.00741959	TMSB10	pseudobulk	up
TRPV2	1.53151	4.59138	70.3225	0.000334369	0.0064862	TRPV2	pseudobulk	up
CLIC1	1.52976	3.617	55.5133	0.000591975	0.00808082	CLIC1	pseudobulk	up
ANGPT4	1.52805	-0.401981	8.65454	0.0310663	0.070507	ANGPT4	pseudobulk	up
PMFBP1	1.52648	2.50261	39.2494	0.00134307	0.0120877	PMFBP1	pseudobulk	up
CLYBL	1.52519	2.89597	26.3456	0.00332627	0.0187552	CLYBL	pseudobulk	up
ZC2HC1A	1.52453	3.55495	34.8715	0.00176521	0.0137119	ZC2HC1A	pseudobulk	up
SPG21	1.52355	5.83657	93.0733	0.000168164	0.00452967	SPG21	pseudobulk	up
C9orf43	1.52322	0.726571	19.2409	0.00657944	0.0270431	C9orf43	pseudobulk	up
CPNE2	1.52306	2.94522	19.6996	0.0062525	0.0263744	CPNE2	pseudobulk	up
PARP10	1.52188	4.65422	53.9707	0.000633252	0.00834033	PARP10	pseudobulk	up
PYROXD2	1.52047	2.25407	37.9297	0.00145418	0.0125096	PYROXD2	pseudobulk	up
RFX5	1.51993	5.85723	103.273	0.000130011	0.0041093	RFX5	pseudobulk	up
MUSTN1	1.51967	3.60295	62.3335	0.00044794	0.00719617	MUSTN1	pseudobulk	up
ZNF331	1.51893	3.59258	73.1819	0.00030344	0.00612491	ZNF331	pseudobulk	up
ARID5B	1.51607	4.8739	66.5853	0.000381804	0.00685698	ARID5B	pseudobulk	up
CLEC18A	1.51351	-0.611222	3.00826	0.141028	0.2145	CLEC18A	pseudobulk	up
PYCR3	1.51237	1.34772	25.6124	0.00354332	0.0193461	PYCR3	pseudobulk	up
LCA5	1.51231	-1.15611	2.42632	0.177653	0.257311	LCA5	pseudobulk	up
MYB	1.51207	-1.34946	1.32812	0.293305	0.383184	MYB	pseudobulk	up
NAGS	1.51154	0.331036	7.83687	0.0367431	0.0795187	NAGS	pseudobulk	up
IDS	1.51103	5.38988	98.6245	0.000145726	0.00424367	IDS	pseudobulk	up
SLC12A8	1.50872	0.482173	15.9921	0.0097312	0.0339656	SLC12A8	pseudobulk	up
ATP6AP1	1.50849	5.62813	60.1878	0.000487418	0.00745699	ATP6AP1	pseudobulk	up
HAMP	1.5069	1.83777	4.94675	0.0749438	0.133009	HAMP	pseudobulk	up
ASIC1	1.5058	-1.00277	3.48545	0.116429	0.184999	ASIC1	pseudobulk	up
TIPARP	1.50545	2.6727	53.2778	0.000653192	0.0084565	TIPARP	pseudobulk	up
RSPH4A	1.50501	-0.89183	4.33596	0.0869311	0.148445	RSPH4A	pseudobulk	up
EML2	1.50381	3.74224	51.6119	0.00070456	0.00875496	EML2	pseudobulk	up
ATP5MGL	1.50176	-0.657326	3.3326	0.125759	0.19624	ATP5MGL	pseudobulk	up
ZSCAN20	1.50159	1.23885	13.7869	0.0129947	0.0404823	ZSCAN20	pseudobulk	up
CFAP70	1.5014	1.07389	18.5284	0.00712487	0.0284167	CFAP70	pseudobulk	up
MTCL1	1.50083	1.49112	17.2989	0.00821301	0.030852	MTCL1	pseudobulk	up
CD58	1.49941	3.84731	53.9335	0.000634313	0.00834454	CD58	pseudobulk	up
ALG14	1.49907	1.30433	19.5504	0.00635684	0.026595	ALG14	pseudobulk	up
SLC39A8	1.49886	1.10803	18.8559	0.00686505	0.0277423	SLC39A8	pseudobulk	up
GLMP	1.49536	4.4294	49.1828	0.000790144	0.00922306	GLMP	pseudobulk	up
HAPLN3	1.49529	1.44659	2.75448	0.15593	0.232506	HAPLN3	pseudobulk	up
ARSD	1.4946	2.70846	33.4891	0.00193689	0.0143568	ARSD	pseudobulk	up
C11orf80	1.49349	1.95889	32.0315	0.00214436	0.0150517	C11orf80	pseudobulk	up
PRKAR1B	1.49269	1.29658	21.4833	0.00519783	0.0238321	PRKAR1B	pseudobulk	up
SLC2A6	1.49039	0.769502	18.0343	0.00754125	0.0292723	SLC2A6	pseudobulk	up
GRAMD4	1.49006	5.24802	81.9359	0.000230137	0.00528467	GRAMD4	pseudobulk	up
NBEAL2	1.48875	5.55447	26.7495	0.00321548	0.018467	NBEAL2	pseudobulk	up
GPR161	1.48832	0.892829	9.59236	0.0257949	0.062523	GPR161	pseudobulk	up
ZAP70	1.48813	-0.265337	10.101	0.0235644	0.0589066	ZAP70	pseudobulk	up
BCAR1	1.48813	0.179997	12.1181	0.0167779	0.047598	BCAR1	pseudobulk	up
ANKRD36	1.48781	2.33751	37.4431	0.00149834	0.0126943	ANKRD36	pseudobulk	up
LIMD1	1.4876	5.60539	72.098	0.000314662	0.00627996	LIMD1	pseudobulk	up
MYBPC3	1.48506	2.08186	39.23	0.00134473	0.0120942	MYBPC3	pseudobulk	up
ANXA5	1.48482	6.51489	44.7364	0.000988562	0.0102959	ANXA5	pseudobulk	up
SCPEP1	1.48326	5.6171	92.8046	0.000169369	0.00452967	SCPEP1	pseudobulk	up
C12orf49	1.48286	1.42193	21.4096	0.00523733	0.0239198	C12orf49	pseudobulk	up
TMEM251	1.48125	4.03053	35.7534	0.00166662	0.0132699	TMEM251	pseudobulk	up
CKLF	1.47991	6.71237	101.593	0.000135405	0.00413626	CKLF	pseudobulk	up
AKT1S1	1.47981	4.71931	83.5443	0.000219411	0.00511307	AKT1S1	pseudobulk	up
ZNF229	1.47899	1.07083	16.5528	0.00899757	0.032445	ZNF229	pseudobulk	up
TMEM220	1.47836	2.89472	52.7816	0.000667931	0.00852887	TMEM220	pseudobulk	up
CCDC180	1.47729	2.6472	45.7402	0.000938315	0.0100041	CCDC180	pseudobulk	up
SIGIRR	1.47682	2.76564	53.0249	0.000660652	0.00847739	SIGIRR	pseudobulk	up
BAG1	1.47557	6.09544	53.7853	0.000638476	0.0083824	BAG1	pseudobulk	up
KLKB1	1.47538	1.84846	21.9163	0.00497884	0.0231989	KLKB1	pseudobulk	up
ACSF2	1.47447	4.78457	76.6366	0.000271097	0.00572463	ACSF2	pseudobulk	up
SPTBN5	1.4735	1.61469	17.9671	0.00758938	0.0293799	SPTBN5	pseudobulk	up
ZNF558	1.47089	2.44479	38.6692	0.00139038	0.0122714	ZNF558	pseudobulk	up
EID3	1.47075	3.17452	58.2594	0.000527203	0.00771249	EID3	pseudobulk	up
DUSP15	1.46931	0.697542	11.2008	0.019387	0.0520041	DUSP15	pseudobulk	up
ARMT1	1.46813	2.01793	36.8779	0.00155205	0.0128517	ARMT1	pseudobulk	up
TMEM159	1.4679	2.05608	37.2668	0.00151488	0.012757	TMEM159	pseudobulk	up
CCDC38	1.46602	-0.927834	3.67544	0.111494	0.178834	CCDC38	pseudobulk	up
ERBB2	1.46249	0.843328	17.7899	0.00775226	0.0297956	ERBB2	pseudobulk	up
AIFM2	1.4612	2.62202	41.5129	0.00117838	0.0112741	AIFM2	pseudobulk	up
CYP2D6	1.46084	-1.95476	0.825636	0.398342	0.487651	CYP2D6	pseudobulk	up
IMPG2	1.45921	-1.11338	4.03988	0.0980184	0.162513	IMPG2	pseudobulk	up
OAS1	1.45686	6.26844	13.6309	0.0132841	0.0410021	OAS1	pseudobulk	up
FAM71F2	1.45626	1.69972	28.2923	0.00283815	0.0173487	FAM71F2	pseudobulk	up
PTK2B	1.45555	5.51	93.1085	0.000168007	0.00452967	PTK2B	pseudobulk	up
LY75	1.45342	2.41989	21.8561	0.00500698	0.0232715	LY75	pseudobulk	up
PLEKHO2	1.45339	6.81171	46.9643	0.00088144	0.00980126	PLEKHO2	pseudobulk	up
HEBP1	1.45329	3.22316	35.6279	0.00168025	0.0133252	HEBP1	pseudobulk	up
SEPTIN1	1.45274	0.33466	12.1167	0.016737	0.0475234	SEPTIN1	pseudobulk	up
MAFB	1.45094	8.45568	62.1212	0.000451625	0.00719617	MAFB	pseudobulk	up
COMT	1.44954	4.93375	83.0842	0.000222412	0.00516455	COMT	pseudobulk	up
XRRA1	1.44865	2.63587	13.3942	0.0137504	0.041877	XRRA1	pseudobulk	up
CLEC7A	1.44774	7.46182	104.733	0.000125562	0.00403527	CLEC7A	pseudobulk	up
NCF2	1.44664	6.3998	24.7287	0.00382551	0.0200978	NCF2	pseudobulk	up
NCOA7	1.44525	4.40584	74.8789	0.000286917	0.00588721	NCOA7	pseudobulk	up
PHYH	1.44393	2.15909	34.6426	0.0017925	0.0138333	PHYH	pseudobulk	up
CAPN3	1.44385	5.09431	85.9424	0.000204667	0.00494413	CAPN3	pseudobulk	up
MYO1G	1.44324	4.44729	13.4505	0.0136365	0.0416175	MYO1G	pseudobulk	up
SCARB2	1.4424	3.86489	52.0946	0.000689092	0.00865361	SCARB2	pseudobulk	up
SPAG1	1.43988	-0.417615	4.56359	0.0841444	0.144847	SPAG1	pseudobulk	up
PLK3	1.43775	5.64534	92.255	0.00017187	0.00456804	PLK3	pseudobulk	up
DSC2	1.43597	2.61215	18.2716	0.00732643	0.0288272	DSC2	pseudobulk	up
C15orf62	1.43588	-0.505232	4.8006	0.0784568	0.137542	C15orf62	pseudobulk	up
SYNE4	1.43366	-0.0405931	8.10753	0.0347548	0.0764089	SYNE4	pseudobulk	up
CDCP2	1.43366	-0.318982	7.82753	0.0368833	0.0797163	CDCP2	pseudobulk	up
CTSF	1.43142	3.52594	64.3109	0.000415363	0.00703826	CTSF	pseudobulk	up
PTRHD1	1.42945	2.05198	27.9359	0.00291968	0.0176153	PTRHD1	pseudobulk	up
NAPRT	1.42852	5.39764	6.23722	0.053047	0.103493	NAPRT	pseudobulk	up
ZNF589	1.4273	4.53128	49.0887	0.000793739	0.00924848	ZNF589	pseudobulk	up
TPCN2	1.42717	2.18381	31.8891	0.00216579	0.0150947	TPCN2	pseudobulk	up
ADAM8	1.42668	3.17622	49.5853	0.0007751	0.00913687	ADAM8	pseudobulk	up
AP2S1	1.42584	2.6227	27.7101	0.00297254	0.017747	AP2S1	pseudobulk	up
DEPDC4	1.42366	0.0510821	8.71121	0.0306229	0.0697554	DEPDC4	pseudobulk	up
TOM1L2	1.42153	4.66874	78.3562	0.00025677	0.00554324	TOM1L2	pseudobulk	up
HK1	1.42119	5.21462	85.5874	0.000206761	0.0049639	HK1	pseudobulk	up
CREB5	1.42068	4.41739	33.7506	0.00190253	0.0142462	CREB5	pseudobulk	up
ZNF267	1.42011	4.56048	59.202	0.000507207	0.00758195	ZNF267	pseudobulk	up
ADARB1	1.4201	3.16976	24.0192	0.00407803	0.0208303	ADARB1	pseudobulk	up
ARHGAP15	1.41972	6.88267	90.9262	0.000178134	0.00465763	ARHGAP15	pseudobulk	up
ERGIC1	1.41921	3.42126	44.9093	0.000979672	0.0102524	ERGIC1	pseudobulk	up
ATIC	1.41678	4.19673	39.7658	0.00130263	0.011871	ATIC	pseudobulk	up
HEG1	1.41667	2.59828	27.5829	0.00300343	0.0178239	HEG1	pseudobulk	up
CTSB	1.41553	8.36089	97.3986	0.000150306	0.00430153	CTSB	pseudobulk	up
ICAM1	1.41448	4.60188	55.9851	0.000580065	0.00796118	ICAM1	pseudobulk	up
IL18	1.41287	5.7521	74.7277	0.00028833	0.00589886	IL18	pseudobulk	up
MBNL3	1.41171	3.13294	55.1496	0.000601384	0.00811588	MBNL3	pseudobulk	up
FAM200B	1.40792	2.74964	45.0243	0.000973837	0.0102323	FAM200B	pseudobulk	up
HVCN1	1.40786	4.87141	61.1277	0.00046955	0.00732095	HVCN1	pseudobulk	up
RSPH3	1.40692	3.68997	60.702	0.000477549	0.00738227	RSPH3	pseudobulk	up
RABL3	1.406	2.54732	39.4384	0.00132809	0.0120191	RABL3	pseudobulk	up
SLC29A2	1.40492	1.10086	17.1968	0.00832041	0.0310918	SLC29A2	pseudobulk	up
AMFR	1.40462	4.24103	56.9417	0.000556962	0.00791087	AMFR	pseudobulk	up
IL1A	1.4042	2.9577	31.1513	0.00228387	0.0156068	IL1A	pseudobulk	up
THNSL2	1.40261	3.10677	6.30291	0.0521882	0.102245	THNSL2	pseudobulk	up
TBC1D32	1.40248	1.0933	13.8662	0.0128481	0.0401791	TBC1D32	pseudobulk	up
METTL1	1.40227	2.46356	42.6335	0.00110712	0.0109786	METTL1	pseudobulk	up
AHCY	1.40135	2.7821	45.2928	0.000960292	0.0101472	AHCY	pseudobulk	up
FNIP2	1.40123	4.31565	72.0765	0.000314898	0.00627996	FNIP2	pseudobulk	up
C1QB	1.39746	7.1338	43.6315	0.00104846	0.0106312	C1QB	pseudobulk	up
ZKSCAN3	1.39686	2.49287	40.6445	0.00123807	0.0115488	ZKSCAN3	pseudobulk	up
ABCA1	1.393	7.5455	23.5714	0.00424913	0.0212701	ABCA1	pseudobulk	up
SH3PXD2A	1.39231	5.20837	19.5203	0.00637438	0.0266158	SH3PXD2A	pseudobulk	up
ITGA2B	1.39222	-0.565032	5.41006	0.0659135	0.121579	ITGA2B	pseudobulk	up
TCTN2	1.39175	1.08071	11.6358	0.0180408	0.0498584	TCTN2	pseudobulk	up
MFGE8	1.39138	2.00357	28.0838	0.00288517	0.0174717	MFGE8	pseudobulk	up
APOC2	1.39113	6.36773	83.8679	0.000217337	0.00509837	APOC2	pseudobulk	up
TEAD1	1.38916	-0.0164688	5.20946	0.0697101	0.126067	TEAD1	pseudobulk	up
SLC15A3	1.38853	7.08184	38.9062	0.00137055	0.0122064	SLC15A3	pseudobulk	up
EEF1AKMT3	1.3869	2.88287	16.8898	0.00862515	0.0317067	EEF1AKMT3	pseudobulk	up
PHKG1	1.38629	-0.0055666	10.499	0.0219352	0.0562829	PHKG1	pseudobulk	up
CYB5R1	1.3854	4.10027	53.7008	0.000640896	0.00838886	CYB5R1	pseudobulk	up
UACA	1.3835	3.44382	56.0124	0.000579404	0.00796118	UACA	pseudobulk	up
BTF3	1.38329	-0.786929	4.86729	0.0765443	0.13517	BTF3	pseudobulk	up
ALPK1	1.38222	4.78682	77.7478	0.000261717	0.00559902	ALPK1	pseudobulk	up
FLACC1	1.38161	0.965545	15.5196	0.0102595	0.0350306	FLACC1	pseudobulk	up
S1PR2	1.38128	1.97712	33.8892	0.00188516	0.0142221	S1PR2	pseudobulk	up
TPP1	1.37922	7.21124	28.3699	0.0028198	0.0173218	TPP1	pseudobulk	up
ACTA2	1.37847	-0.710778	3.64482	0.111738	0.179093	ACTA2	pseudobulk	up
RFK	1.37831	-0.189022	8.183	0.0341836	0.0756094	RFK	pseudobulk	up
TRAC	1.37728	-1.90784	2.4176	0.167506	0.245999	TRAC	pseudobulk	up
CLEC19A	1.37728	-1.86069	2.42908	0.166644	0.245064	CLEC19A	pseudobulk	up
RAB27A	1.37582	2.57093	40.9189	0.00121876	0.0114506	RAB27A	pseudobulk	up
SLC18B1	1.37454	3.60207	25.7595	0.00349609	0.0192119	SLC18B1	pseudobulk	up
SEC22C	1.37267	3.02111	47.2952	0.000866997	0.00973966	SEC22C	pseudobulk	up
STS	1.3706	0.846361	15.5738	0.0101878	0.0348862	STS	pseudobulk	up
ALDH1L2	1.37009	4.40057	72.003	0.000315682	0.00627996	ALDH1L2	pseudobulk	up
NFKBIZ	1.36691	4.65793	65.9191	0.000391232	0.00693015	NFKBIZ	pseudobulk	up
WIPF1	1.36665	6.72783	78.329	0.000256986	0.00554324	WIPF1	pseudobulk	up
NME1	1.36662	2.62029	26.2547	0.00335194	0.0187762	NME1	pseudobulk	up
C3orf62	1.36401	3.87338	64.0771	0.000419031	0.00704866	C3orf62	pseudobulk	up
C1QTNF6	1.36364	2.77299	32.4866	0.00207599	0.0147961	C1QTNF6	pseudobulk	up
ALAS1	1.36081	4.32135	43.3846	0.00106255	0.0106891	ALAS1	pseudobulk	up
SOX4	1.35966	1.80546	17.3898	0.00812186	0.0306548	SOX4	pseudobulk	up
FAM180B	1.359	0.0517226	10.7013	0.0211516	0.0549749	FAM180B	pseudobulk	up
APOL2	1.35885	4.57759	70.3112	0.000334499	0.0064862	APOL2	pseudobulk	up
ZNF600	1.35823	1.779	27.6718	0.00298236	0.0177716	ZNF600	pseudobulk	up
LRGUK	1.35728	1.1668	10.3415	0.0224755	0.0572414	LRGUK	pseudobulk	up
APOA1	1.35554	-1.06752	4.17329	0.0918417	0.154789	APOA1	pseudobulk	up
CPNE8	1.35514	3.86126	54.4419	0.000620235	0.00828364	CPNE8	pseudobulk	up
LPIN1	1.35493	3.36983	28.445	0.00280326	0.0172885	LPIN1	pseudobulk	up
CCL4	1.35248	2.68733	21.4038	0.00523804	0.0239198	CCL4	pseudobulk	up
TP53I3	1.35225	3.35147	37.4394	0.0014984	0.0126943	TP53I3	pseudobulk	up
C7orf50	1.3522	5.15224	64.6756	0.000409696	0.00702417	C7orf50	pseudobulk	up
SIRPD	1.35182	1.14856	11.7841	0.0176216	0.0491371	SIRPD	pseudobulk	up
FAXDC2	1.35114	1.91721	26.4074	0.00330959	0.0187051	FAXDC2	pseudobulk	up
SLC35F6	1.3506	5.14082	59.3488	0.000504182	0.00756567	SLC35F6	pseudobulk	up
TTC4	1.3506	2.91871	41.3706	0.00118781	0.011315	TTC4	pseudobulk	up
CMTM2	1.34852	0.896667	9.62986	0.0255903	0.0621194	CMTM2	pseudobulk	up
TIMM10	1.34796	3.5227	40.1438	0.00127425	0.0117519	TIMM10	pseudobulk	up
DGLUCY	1.34752	5.16295	78.0666	0.000259106	0.00557056	DGLUCY	pseudobulk	up
DOCK5	1.34751	6.34217	78.5953	0.000254859	0.00552446	DOCK5	pseudobulk	up
MPV17L	1.34727	1.01582	8.16153	0.0341936	0.0756188	MPV17L	pseudobulk	up
TRIM4	1.34624	4.82049	31.989	0.00215011	0.0150634	TRIM4	pseudobulk	up
TTC7A	1.34594	5.17531	65.8345	0.000392443	0.00693015	TTC7A	pseudobulk	up
PBDC1	1.34528	3.14314	20.1223	0.00597673	0.0256107	PBDC1	pseudobulk	up
IAH1	1.34512	3.90644	62.4833	0.000445343	0.00719617	IAH1	pseudobulk	up
SLFN12	1.34482	2.62176	27.8729	0.00293394	0.0176361	SLFN12	pseudobulk	up
OSBPL3	1.34417	4.59923	42.3121	0.0011268	0.011071	OSBPL3	pseudobulk	up
TRIM21	1.34379	4.42438	70.5263	0.000332022	0.00647666	TRIM21	pseudobulk	up
VENTX	1.34358	5.19677	32.8234	0.00202757	0.0146268	VENTX	pseudobulk	up
SETDB2	1.34142	5.19666	58.3676	0.000524817	0.00771249	SETDB2	pseudobulk	up
NME2	1.34123	3.92248	36.9467	0.00154501	0.0128517	NME2	pseudobulk	up
ST18	1.33869	1.78295	5.22418	0.0692855	0.12558	ST18	pseudobulk	up
FOXN2	1.33853	3.78237	61.9971	0.000453827	0.00719617	FOXN2	pseudobulk	up
CYTL1	1.33837	1.9658	26.3151	0.00333533	0.0187612	CYTL1	pseudobulk	up
C17orf100	1.33782	-0.207836	5.47779	0.0647869	0.120146	C17orf100	pseudobulk	up
DCBLD2	1.33771	1.98691	30.2243	0.00244586	0.0161324	DCBLD2	pseudobulk	up
FAM186B	1.33615	0.63946	12.0588	0.0168831	0.0477824	FAM186B	pseudobulk	up
PTCRA	1.33267	2.22274	18.8455	0.00686648	0.0277423	PTCRA	pseudobulk	up
FANCF	1.3326	2.76403	22.8439	0.00454969	0.0220555	FANCF	pseudobulk	up
CLDN23	1.33257	2.56781	24.7305	0.00382532	0.0200978	CLDN23	pseudobulk	up
PLXND1	1.33237	7.49662	46.6973	0.000893404	0.00984706	PLXND1	pseudobulk	up
SLC6A19	1.33173	-0.874399	4.35937	0.0893471	0.151465	SLC6A19	pseudobulk	up
COX5B	1.33071	2.22835	8.59111	0.0312927	0.0708621	COX5B	pseudobulk	up
ARHGAP25	1.3303	5.24855	57.3742	0.000546921	0.00784321	ARHGAP25	pseudobulk	up
ZNF763	1.32986	-0.469023	5.90775	0.0578969	0.110397	ZNF763	pseudobulk	up
SCML1	1.3296	3.80416	59.6063	0.000498969	0.0075191	SCML1	pseudobulk	up
CDC42EP4	1.32676	-0.809185	4.05593	0.0984615	0.163041	CDC42EP4	pseudobulk	up
SLC14A1	1.32676	-0.809185	4.05593	0.0984615	0.163041	SLC14A1	pseudobulk	up
UBL4A	1.32657	0.81662	6.50326	0.0496993	0.0985078	UBL4A	pseudobulk	up
LRRC17	1.32611	-0.272523	6.826	0.0461322	0.0932973	LRRC17	pseudobulk	up
ATP6V1F	1.32409	4.59506	67.7354	0.000366266	0.00668658	ATP6V1F	pseudobulk	up
DYNLT1	1.32408	4.36101	56.7986	0.000560333	0.00791379	DYNLT1	pseudobulk	up
TMEM18	1.32405	3.86285	15.2405	0.0106351	0.0357978	TMEM18	pseudobulk	up
CELSR3	1.32361	0.139471	8.38034	0.0327276	0.0732456	CELSR3	pseudobulk	up
TRAF5	1.32254	3.21998	47.1119	0.000874983	0.00978299	TRAF5	pseudobulk	up
SLC66A3	1.32165	3.37497	50.7479	0.000733477	0.0089031	SLC66A3	pseudobulk	up
MEAK7	1.32115	2.88288	44.2711	0.00101327	0.0104614	MEAK7	pseudobulk	up
SIPA1L1	1.32106	2.79385	40.5867	0.00124215	0.0115621	SIPA1L1	pseudobulk	up
CHCHD10	1.32039	3.62963	48.7578	0.000806605	0.00933173	CHCHD10	pseudobulk	up
KLRK1	1.32024	-0.0191386	1.7946	0.229461	0.315605	KLRK1	pseudobulk	up
SEMA4F	1.31795	1.13067	11.7721	0.0176449	0.0491917	SEMA4F	pseudobulk	up
SRSF8	1.31619	3.67589	57.3853	0.000546687	0.00784321	SRSF8	pseudobulk	up
ZNF888	1.31564	0.329682	11.5515	0.0183157	0.0503094	ZNF888	pseudobulk	up
UNC93B1	1.3153	6.00808	53.4125	0.000649178	0.00843905	UNC93B1	pseudobulk	up
CCPG1	1.3143	4.98847	55.3779	0.000595413	0.00809463	CCPG1	pseudobulk	up
WNT2B	1.31206	3.04117	43.3745	0.00106318	0.0106891	WNT2B	pseudobulk	up
B3GNT2	1.31141	5.23547	44.0849	0.00102329	0.0104901	B3GNT2	pseudobulk	up
GAS8	1.31046	1.6087	13.6392	0.0132717	0.0409737	GAS8	pseudobulk	up
PI4K2B	1.30991	2.96101	38.804	0.00137905	0.0122336	PI4K2B	pseudobulk	up
AGTRAP	1.30973	3.9687	61.4257	0.000464079	0.00728789	AGTRAP	pseudobulk	up
ERN1	1.30903	4.43489	45.1014	0.000969837	0.0102068	ERN1	pseudobulk	up
TTC23	1.309	3.62064	57.1677	0.000551696	0.00786237	TTC23	pseudobulk	up
METTL27	1.30867	3.15835	30.9378	0.00231969	0.0156985	METTL27	pseudobulk	up
HTR2B	1.30843	-0.534997	3.05386	0.139281	0.212363	HTR2B	pseudobulk	up
SLC9A1	1.30743	2.77002	30.9346	0.00232027	0.0156985	SLC9A1	pseudobulk	up
RRM2B	1.30639	2.07884	22.4857	0.00470889	0.0224274	RRM2B	pseudobulk	up
PER3	1.30555	4.89439	70.6083	0.000331077	0.0064679	PER3	pseudobulk	up
MTHFD2	1.3055	4.34954	48.9913	0.000797497	0.00925652	MTHFD2	pseudobulk	up
SLC4A8	1.30528	3.83675	58.9562	0.000512314	0.00758877	SLC4A8	pseudobulk	up
IGSF6	1.30513	4.86325	53.1414	0.000657122	0.00846517	IGSF6	pseudobulk	up
NT5C3A	1.30256	3.10211	19.9992	0.00605514	0.025805	NT5C3A	pseudobulk	up
MICAL1	1.30238	7.52018	52.8569	0.000665595	0.00850853	MICAL1	pseudobulk	up
PILRA	1.30229	4.40113	39.3831	0.00133229	0.0120404	PILRA	pseudobulk	up
HINT1	1.29826	2.847	21.3356	0.00527338	0.0239783	HINT1	pseudobulk	up
SOCS6	1.29662	7.86341	19.6652	0.00627535	0.0264428	SOCS6	pseudobulk	up
TRADD	1.29619	4.0478	58.3535	0.000525134	0.00771249	TRADD	pseudobulk	up
TUBB2A	1.29603	1.26182	15.4471	0.0103529	0.0352296	TUBB2A	pseudobulk	up
KCTD10	1.29507	3.11126	26.5602	0.00326678	0.0185816	KCTD10	pseudobulk	up
IFT22	1.29497	0.960158	16.5539	0.00899404	0.032445	IFT22	pseudobulk	up
MYL7	1.29397	-0.024351	4.58288	0.0836209	0.144117	MYL7	pseudobulk	up
HEXB	1.29397	5.75455	23.7114	0.00419452	0.021102	HEXB	pseudobulk	up
TXNRD2	1.28875	4.35831	57.7185	0.000539126	0.00780706	TXNRD2	pseudobulk	up
FANK1	1.28839	-1.0348	3.52154	0.117437	0.186193	FANK1	pseudobulk	up
SCIMP	1.28644	4.59744	16.9817	0.0085289	0.0314679	SCIMP	pseudobulk	up
COMMD9	1.28491	4.07018	30.2192	0.00244629	0.0161324	COMMD9	pseudobulk	up
TRAPPC6A	1.28242	3.06399	32.6102	0.00205806	0.0147327	TRAPPC6A	pseudobulk	up
MGST3	1.28214	4.6591	42.2443	0.00113104	0.0110894	MGST3	pseudobulk	up
LACTB	1.27944	3.1804	44.1332	0.00102072	0.0104802	LACTB	pseudobulk	up
CCDC191	1.27802	2.50942	29.6952	0.00254503	0.0164501	CCDC191	pseudobulk	up
ZMIZ1	1.27749	4.01583	22.7405	0.00459455	0.0221878	ZMIZ1	pseudobulk	up
ITGA11	1.27678	0.634477	13.6128	0.0133283	0.0410597	ITGA11	pseudobulk	up
STOM	1.27572	5.06575	49.7177	0.000770091	0.00911963	STOM	pseudobulk	up
PELI3	1.27554	2.84425	24.4472	0.00392325	0.0203816	PELI3	pseudobulk	up
GADD45B	1.2741	1.90359	17.9467	0.0076073	0.0293975	GADD45B	pseudobulk	up
MVP	1.2734	2.99679	32.7184	0.00204258	0.0146494	MVP	pseudobulk	up
PAM	1.27184	0.103542	6.70143	0.0475058	0.0952013	PAM	pseudobulk	up
TTC12	1.27155	3.58168	25.824	0.00347677	0.019154	TTC12	pseudobulk	up
PIH1D2	1.27128	-1.00659	2.03035	0.211824	0.296154	PIH1D2	pseudobulk	up
SNAPC2	1.27036	2.37818	26.6249	0.00324942	0.018558	SNAPC2	pseudobulk	up
CCNYL1	1.27002	4.91518	62.415	0.000446508	0.00719617	CCNYL1	pseudobulk	up
LTB4R	1.26993	4.82152	49.8373	0.000765709	0.00909235	LTB4R	pseudobulk	up
EOGT	1.26967	3.90923	48.3928	0.000821095	0.00943963	EOGT	pseudobulk	up
MTHFD1	1.26914	3.98177	50.8256	0.000730786	0.00889937	MTHFD1	pseudobulk	up
ANGPTL6	1.26816	0.787686	15.4008	0.0104188	0.035334	ANGPTL6	pseudobulk	up
ZC4H2	1.26815	0.727527	13.5282	0.0134953	0.0413704	ZC4H2	pseudobulk	up
YARS	1.26734	3.64102	52.6078	0.000673166	0.00854554	YARS	pseudobulk	up
B3GNTL1	1.26699	3.95272	53.7461	0.000639606	0.00838881	B3GNTL1	pseudobulk	up
ADGRE1	1.26603	2.28125	28.1469	0.00287053	0.0174389	ADGRE1	pseudobulk	up
UAP1	1.26559	3.01242	43.7612	0.00104125	0.0105745	UAP1	pseudobulk	up
MFSD13A	1.26527	3.9472	57.0973	0.000553329	0.00787453	MFSD13A	pseudobulk	up
NEDD9	1.26516	1.3279	10.013	0.0238374	0.0593092	NEDD9	pseudobulk	up
ACTG1	1.2651	5.24133	20.0166	0.00604379	0.0257919	ACTG1	pseudobulk	up
TNFRSF10A	1.26483	2.40973	34.5871	0.00179888	0.0138498	TNFRSF10A	pseudobulk	up
ZNF671	1.26314	3.69723	34.4272	0.00181794	0.0139471	ZNF671	pseudobulk	up
PEBP1	1.26302	4.4724	23.938	0.00410822	0.0209298	PEBP1	pseudobulk	up
DNAH14	1.26261	2.08961	30.5746	0.00238279	0.0158903	DNAH14	pseudobulk	up
ALDH3A2	1.26244	4.39637	61.6413	0.00046017	0.00724504	ALDH3A2	pseudobulk	up
C1orf198	1.26161	1.97928	16.9632	0.00854931	0.0315254	C1orf198	pseudobulk	up
FNDC3B	1.26136	5.52961	63.3623	0.000430544	0.00713442	FNDC3B	pseudobulk	up
TRIM22	1.26107	7.20665	18.236	0.00735566	0.0288878	TRIM22	pseudobulk	up
CS	1.26105	-0.743231	4.83273	0.0777374	0.136636	CS	pseudobulk	up
HHIPL2	1.26061	-0.632719	2.7091	0.15899	0.236137	HHIPL2	pseudobulk	up
SPEF2	1.25882	1.80723	18.3311	0.0072771	0.0287254	SPEF2	pseudobulk	up
MMP21	1.25753	-0.0444807	9.31359	0.0272035	0.0645625	MMP21	pseudobulk	up
AGPAT2	1.25551	3.83555	54.9756	0.000605919	0.0081518	AGPAT2	pseudobulk	up
ACCS	1.2554	4.77051	33.7402	0.00190386	0.0142462	ACCS	pseudobulk	up
MCL1	1.25463	7.31248	32.7684	0.00203534	0.0146345	MCL1	pseudobulk	up
ASGR1	1.25311	1.09664	14.5273	0.0117137	0.0379384	ASGR1	pseudobulk	up
MAMLD1	1.2527	-0.410295	2.83357	0.151452	0.227125	MAMLD1	pseudobulk	up
MOSPD1	1.25269	2.82046	35.8587	0.00165546	0.0132538	MOSPD1	pseudobulk	up
GSPT2	1.2512	1.96688	10.2477	0.0228472	0.0577988	GSPT2	pseudobulk	up
CELF6	1.25018	5.74184	56.475	0.000568057	0.00794549	CELF6	pseudobulk	up
IL2RG	1.24974	3.27427	34.6489	0.00179139	0.0138329	IL2RG	pseudobulk	up
ZNF350	1.24931	3.33942	46.4707	0.000903777	0.00987796	ZNF350	pseudobulk	up
ICAM2	1.24466	1.90688	25.0779	0.00371005	0.0197599	ICAM2	pseudobulk	up
OSBPL1A	1.24266	3.55727	50.24	0.000751226	0.0089964	OSBPL1A	pseudobulk	up
DHRSX	1.24215	4.31267	54.213	0.00062651	0.00828364	DHRSX	pseudobulk	up
CEP70	1.24211	1.53293	14.9597	0.0110431	0.0365769	CEP70	pseudobulk	up
CNEP1R1	1.24172	2.80655	38.2591	0.0014251	0.0123654	CNEP1R1	pseudobulk	up
MAP4	1.24102	5.32245	54.2528	0.000625399	0.00828364	MAP4	pseudobulk	up
ADA2	1.2402	6.24757	63.4445	0.000429197	0.00713442	ADA2	pseudobulk	up
PTGR1	1.23935	3.49648	49.5884	0.000774897	0.00913687	PTGR1	pseudobulk	up
MGAT1	1.23919	6.4237	35.1752	0.00173031	0.0135294	MGAT1	pseudobulk	up
POMP	1.23849	2.52061	33.6488	0.00191591	0.0142835	POMP	pseudobulk	up
RNF13	1.23756	4.28493	50.3281	0.000748087	0.00898257	RNF13	pseudobulk	up
TSPAN15	1.23651	4.38254	20.4168	0.00579432	0.0251885	TSPAN15	pseudobulk	up
ZNF396	1.23559	1.22589	11.6884	0.0178836	0.0495924	ZNF396	pseudobulk	up
TPRA1	1.2351	4.78616	51.7725	0.000699342	0.00870841	TPRA1	pseudobulk	up
ANKEF1	1.23467	0.91409	14.735	0.0113874	0.0372537	ANKEF1	pseudobulk	up
NOTCH2	1.23415	3.82551	32.7151	0.00204296	0.0146494	NOTCH2	pseudobulk	up
PEPD	1.23303	4.32445	18.1391	0.00743808	0.0290929	PEPD	pseudobulk	up
LILRB4	1.2328	3.98017	25.0568	0.00371615	0.019761	LILRB4	pseudobulk	up
EDN1	1.23197	-0.53249	4.04951	0.0987009	0.163333	EDN1	pseudobulk	up
SPART	1.23019	4.06498	47.0386	0.000878173	0.00979501	SPART	pseudobulk	up
LAPTM4A	1.22987	4.21656	24.9674	0.00374553	0.0198534	LAPTM4A	pseudobulk	up
MAN2A2	1.2297	5.73051	58.232	0.000527759	0.00771249	MAN2A2	pseudobulk	up
CRYZ	1.22864	3.16591	8.97632	0.02898	0.0674495	CRYZ	pseudobulk	up
HDAC4	1.22668	2.67826	36.0407	0.00163628	0.0131325	HDAC4	pseudobulk	up
GOLGA8O	1.22614	0.635777	12.2033	0.016478	0.0470439	GOLGA8O	pseudobulk	up
VRK2	1.22459	4.10709	50.4266	0.000744615	0.00896945	VRK2	pseudobulk	up
DDB2	1.2226	3.33297	38.4036	0.00141264	0.012331	DDB2	pseudobulk	up
TNFSF10	1.22256	4.66193	14.9312	0.0110829	0.0366158	TNFSF10	pseudobulk	up
SLC41A2	1.22137	2.11111	27.5185	0.00301915	0.0179009	SLC41A2	pseudobulk	up
ZMYND15	1.22134	4.38829	56.3057	0.000572173	0.00796118	ZMYND15	pseudobulk	up
TTC21A	1.22048	2.1951	29.3485	0.00261334	0.0166686	TTC21A	pseudobulk	up
RSU1	1.21977	4.32583	33.3933	0.00194942	0.0143891	RSU1	pseudobulk	up
IKBKE	1.21943	5.12016	62.1871	0.000450471	0.00719617	IKBKE	pseudobulk	up
PLEKHA2	1.21902	5.69318	61.6368	0.000460241	0.00724504	PLEKHA2	pseudobulk	up
GALNT12	1.21706	1.07601	11.91	0.017259	0.0484749	GALNT12	pseudobulk	up
GLTP	1.21632	0.823761	13.6822	0.0131943	0.0408023	GLTP	pseudobulk	up
FAM76A	1.21579	3.67625	50.3172	0.000748481	0.00898257	FAM76A	pseudobulk	up
PJVK	1.21454	1.41938	15.162	0.010749	0.0360395	PJVK	pseudobulk	up
BRI3	1.21449	7.32028	56.0441	0.000578587	0.00796118	BRI3	pseudobulk	up
ADPRH	1.21391	3.53586	36.3384	0.00160542	0.0130615	ADPRH	pseudobulk	up
ST3GAL6	1.21354	4.82984	58.2439	0.0005275	0.00771249	ST3GAL6	pseudobulk	up
C10orf143	1.21319	1.78656	24.7788	0.00380935	0.0200614	C10orf143	pseudobulk	up
PTPN7	1.21302	3.54148	7.15316	0.0426212	0.0882076	PTPN7	pseudobulk	up
CDR2	1.21223	3.86324	25.9044	0.0034529	0.0191084	CDR2	pseudobulk	up
FBXL8	1.21141	2.21078	26.3007	0.00333918	0.0187673	FBXL8	pseudobulk	up
NDUFB9	1.21004	3.6521	20.5494	0.00571492	0.0250351	NDUFB9	pseudobulk	up
ZCRB1	1.2098	4.29047	46.9557	0.000881843	0.00980126	ZCRB1	pseudobulk	up
CMTM3	1.20883	6.64617	61.3929	0.000464665	0.00728832	CMTM3	pseudobulk	up
TMPRSS13	1.20878	1.34396	11.1092	0.0196792	0.0525294	TMPRSS13	pseudobulk	up
SNRPD3	1.20809	0.0808257	9.2818	0.0273568	0.0647924	SNRPD3	pseudobulk	up
ADPRHL1	1.20592	-0.44744	4.61065	0.0829248	0.143144	ADPRHL1	pseudobulk	up
ELF3	1.20463	-0.464473	4.1652	0.0951229	0.15864	ELF3	pseudobulk	up
STK31	1.2034	-0.663383	4.25509	0.0924826	0.155588	STK31	pseudobulk	up
PTPDC1	1.20338	2.48511	23.1424	0.0044231	0.0217452	PTPDC1	pseudobulk	up
RTEL1	1.20319	3.48934	30.704	0.00235983	0.0157929	RTEL1	pseudobulk	up
SLC35C2	1.20275	4.28193	45.3178	0.000958954	0.0101461	SLC35C2	pseudobulk	up
SWAP70	1.20197	6.44678	25.6962	0.00351507	0.0192401	SWAP70	pseudobulk	up
NAGK	1.20146	7.22142	68.8755	0.000351703	0.00659442	NAGK	pseudobulk	up
TEC	1.20138	2.82907	26.6553	0.00324103	0.0185458	TEC	pseudobulk	up
SLC7A9	1.20107	0.22811	8.231	0.0337391	0.0748803	SLC7A9	pseudobulk	up
CALML6	1.20054	0.202011	8.57303	0.0314699	0.071137	CALML6	pseudobulk	up
DCAF4	1.19951	2.49679	31.7095	0.00219364	0.0152029	DCAF4	pseudobulk	up
NSUN7	1.19875	2.4002	3.47819	0.11925	0.188358	NSUN7	pseudobulk	up
FABP5	1.19851	1.57408	7.65868	0.0380695	0.0814706	FABP5	pseudobulk	up
PARP4	1.19835	5.0608	59.0169	0.000511034	0.00758713	PARP4	pseudobulk	up
LFNG	1.19803	3.89543	46.0082	0.000925358	0.00994052	LFNG	pseudobulk	up
TRIM26	1.19712	4.02621	27.0111	0.00314663	0.0183156	TRIM26	pseudobulk	up
TRAF3	1.19712	3.92714	51.2195	0.000717476	0.00880815	TRAF3	pseudobulk	up
RAD51AP1	1.1941	1.56275	20.7111	0.00562137	0.0248747	RAD51AP1	pseudobulk	up
CALHM2	1.19372	4.59334	38.2786	0.00142332	0.0123654	CALHM2	pseudobulk	up
CHST13	1.19309	-0.0414478	6.7644	0.0467509	0.0941977	CHST13	pseudobulk	up
COQ3	1.19301	-0.139593	7.32277	0.0410968	0.0859615	COQ3	pseudobulk	up
SHLD2	1.19291	2.40132	24.6238	0.00386181	0.0202072	SHLD2	pseudobulk	up
CHST15	1.19254	4.59988	24.8475	0.00378541	0.0199837	CHST15	pseudobulk	up
NOCT	1.19128	0.315756	5.13253	0.0711666	0.127906	NOCT	pseudobulk	up
DPH3	1.19039	3.67702	46.867	0.000885797	0.00982128	DPH3	pseudobulk	up
BAK1	1.18982	4.63376	36.4453	0.00159453	0.0130451	BAK1	pseudobulk	up
DNAH17	1.18959	0.401497	7.48763	0.0395884	0.0837052	DNAH17	pseudobulk	up
WSB2	1.18739	4.2758	53.0578	0.000659606	0.00847511	WSB2	pseudobulk	up
NSMAF	1.18735	3.81961	46.7005	0.000893278	0.00984706	NSMAF	pseudobulk	up
MYO1C	1.18707	3.976	50.7296	0.00073408	0.0089031	MYO1C	pseudobulk	up
NIN	1.18663	5.49518	39.8279	0.00129787	0.0118525	NIN	pseudobulk	up
CD180	1.18632	3.4224	20.7363	0.00560538	0.0248304	CD180	pseudobulk	up
LRRC37B	1.18526	3.45563	42.9304	0.00108914	0.0108664	LRRC37B	pseudobulk	up
GHITM	1.18509	3.87769	30.7141	0.00235807	0.0157929	GHITM	pseudobulk	up
RIT1	1.18504	3.7687	47.9343	0.000839828	0.00953852	RIT1	pseudobulk	up
RAB11FIP1	1.18493	4.34333	32.518	0.0020713	0.0147808	RAB11FIP1	pseudobulk	up
TICAM1	1.18479	4.47859	38.3622	0.00141613	0.0123473	TICAM1	pseudobulk	up
TRIM6	1.18374	1.57076	7.61418	0.0384436	0.0819887	TRIM6	pseudobulk	up
CD99	1.18361	4.84294	35.3019	0.00171607	0.0134442	CD99	pseudobulk	up
CTU2	1.18355	2.98894	38.9786	0.00136472	0.0121814	CTU2	pseudobulk	up
C1orf53	1.18223	-0.794491	3.1749	0.13241	0.204274	C1orf53	pseudobulk	up
TOR1B	1.18208	3.44894	12.8961	0.0148046	0.0439289	TOR1B	pseudobulk	up
LINS1	1.18164	3.94793	45.0346	0.000973234	0.0102323	LINS1	pseudobulk	up
ATP6V1E2	1.18147	0.550914	8.81847	0.0299239	0.0688359	ATP6V1E2	pseudobulk	up
ZNF334	1.18125	1.67306	19.1489	0.00664048	0.0271912	ZNF334	pseudobulk	up
SLC25A19	1.18069	4.02006	30.2829	0.00243468	0.01612	SLC25A19	pseudobulk	up
TACC3	1.1801	3.73874	47.0495	0.0008777	0.00979501	TACC3	pseudobulk	up
UBE2J1	1.17912	3.33126	27.4693	0.00303088	0.017946	UBE2J1	pseudobulk	up
ATP6AP1L	1.17824	1.05515	13.5691	0.0134097	0.0411959	ATP6AP1L	pseudobulk	up
GNRH2	1.17814	-0.838443	3.80375	0.106852	0.173284	GNRH2	pseudobulk	up
RAB9A	1.17787	2.94255	35.8355	0.00165791	0.0132575	RAB9A	pseudobulk	up
EHHADH	1.17726	1.45503	18.772	0.00692426	0.0278894	EHHADH	pseudobulk	up
OR56B1	1.1772	-1.6922	1.54004	0.265645	0.354248	OR56B1	pseudobulk	up
RTL6	1.17568	1.75886	17.8202	0.00771967	0.0297173	RTL6	pseudobulk	up
EGR1	1.1756	3.21213	4.20282	0.0937522	0.157119	EGR1	pseudobulk	up
ABTB2	1.17512	-0.855865	1.23681	0.315256	0.406371	ABTB2	pseudobulk	up
MB21D2	1.1745	1.8447	18.6701	0.00700388	0.0281233	MB21D2	pseudobulk	up
MAP7D1	1.17384	5.80526	26.8707	0.00318329	0.0183652	MAP7D1	pseudobulk	up
RAB34	1.17382	4.09284	25.9002	0.00345415	0.0191084	RAB34	pseudobulk	up
MYL5	1.17309	3.004	32.8597	0.00202256	0.014623	MYL5	pseudobulk	up
PDLIM7	1.17257	3.61379	25.3418	0.00362466	0.0195705	PDLIM7	pseudobulk	up
SNORC	1.17245	0.363697	9.92949	0.0242423	0.0599285	SNORC	pseudobulk	up
UBXN2A	1.17213	2.57383	26.3429	0.00332707	0.0187552	UBXN2A	pseudobulk	up
GPR180	1.17117	2.51737	30.944	0.00231876	0.0156985	GPR180	pseudobulk	up
HS2ST1	1.16985	3.70839	17.9527	0.0076002	0.0293874	HS2ST1	pseudobulk	up
SPPL2A	1.16967	4.6897	55.8359	0.000583776	0.0080024	SPPL2A	pseudobulk	up
CA5B	1.16789	2.20618	21.9475	0.00496208	0.0231682	CA5B	pseudobulk	up
POLE4	1.1678	3.31718	35.6798	0.00167459	0.0132928	POLE4	pseudobulk	up
COPRS	1.16775	3.59997	16.3329	0.00923958	0.0329895	COPRS	pseudobulk	up
STK24	1.16754	5.52472	52.3431	0.000681295	0.0085926	STK24	pseudobulk	up
DNMT1	1.1673	5.41448	44.9449	0.000977795	0.010241	DNMT1	pseudobulk	up
ZNF296	1.16515	1.59695	10.5756	0.0215623	0.0556873	ZNF296	pseudobulk	up
GPRIN3	1.16432	4.52328	46.027	0.000924461	0.00994052	GPRIN3	pseudobulk	up
TLR3	1.16399	2.44933	27.8178	0.00294693	0.0176734	TLR3	pseudobulk	up
PIGH	1.1633	3.66824	45.5393	0.000948	0.0100735	PIGH	pseudobulk	up
OAT	1.163	0.684392	4.7779	0.0787236	0.137861	OAT	pseudobulk	up
TEDC1	1.16273	2.19778	27.1126	0.0031208	0.0182386	TEDC1	pseudobulk	up
CD300LF	1.16262	5.96746	14.8702	0.0111744	0.0367877	CD300LF	pseudobulk	up
RNF213	1.16249	7.01258	19.4477	0.00642486	0.0267218	RNF213	pseudobulk	up
FGD6	1.16197	2.8798	26.5177	0.00327844	0.0186229	FGD6	pseudobulk	up
SLC25A30	1.16176	3.77994	46.6077	0.000897492	0.00987543	SLC25A30	pseudobulk	up
CPT1A	1.16139	1.89169	20.0046	0.00605266	0.025805	CPT1A	pseudobulk	up
CLEC4E	1.16106	-1.25485	1.37064	0.292093	0.382214	CLEC4E	pseudobulk	up
SPIRE1	1.16062	4.86308	10.4508	0.0220365	0.0564539	SPIRE1	pseudobulk	up
SELL	1.16027	2.35254	24.0038	0.00408396	0.0208512	SELL	pseudobulk	up
FAM210B	1.15926	0.695586	8.16996	0.0341351	0.0755405	FAM210B	pseudobulk	up
TPM4	1.15902	3.04283	24.4929	0.00390708	0.0203542	TPM4	pseudobulk	up
CASP8	1.15887	5.23414	56.8489	0.000559134	0.00791379	CASP8	pseudobulk	up
DCAF4L1	1.15887	-0.318689	5.85954	0.0585883	0.11139	DCAF4L1	pseudobulk	up
SSX2IP	1.15837	0.527352	11.3542	0.0188983	0.0512059	SSX2IP	pseudobulk	up
VAV2	1.15817	2.40189	9.24577	0.0275036	0.0650221	VAV2	pseudobulk	up
THAP6	1.15569	3.87134	33.481	0.00193777	0.0143568	THAP6	pseudobulk	up
NCK1	1.15551	4.88786	24.4742	0.00391346	0.0203631	NCK1	pseudobulk	up
TKT	1.15432	4.01237	15.3519	0.0104798	0.0354859	TKT	pseudobulk	up
SMYD2	1.15295	3.89418	27.296	0.00307392	0.018096	SMYD2	pseudobulk	up
SMIM4	1.15229	2.01866	9.64659	0.0254948	0.0619882	SMIM4	pseudobulk	up
OPLAH	1.15186	4.74015	50.6015	0.000738502	0.00892357	OPLAH	pseudobulk	up
TLCD2	1.15145	1.57767	7.11405	0.0430092	0.0886823	TLCD2	pseudobulk	up
SIRPB1	1.15102	1.725	9.55042	0.0259651	0.0627607	SIRPB1	pseudobulk	up
MS4A4A	1.15094	5.34522	55.5899	0.000589986	0.00807056	MS4A4A	pseudobulk	up
NAGLU	1.1502	4.4363	24.2759	0.00398397	0.020566	NAGLU	pseudobulk	up
PHETA1	1.14946	2.22343	7.02326	0.043916	0.090054	PHETA1	pseudobulk	up
ADAR	1.14875	6.49182	45.5839	0.000945789	0.0100631	ADAR	pseudobulk	up
NPEPL1	1.14772	6.36805	62.2883	0.000448704	0.00719617	NPEPL1	pseudobulk	up
ACOT9	1.14727	5.30331	57.2524	0.000549717	0.00785747	ACOT9	pseudobulk	up
SGSH	1.14656	6.10647	11.7895	0.0175893	0.0490578	SGSH	pseudobulk	up
TDP2	1.14582	3.60433	41.6022	0.00117237	0.011235	TDP2	pseudobulk	up
MPND	1.14452	3.61663	35.7869	0.00166303	0.0132575	MPND	pseudobulk	up
SCARF2	1.14422	1.35085	13.4167	0.0137078	0.0417568	SCARF2	pseudobulk	up
ARHGAP30	1.1441	5.97299	55.276	0.000598045	0.00809463	ARHGAP30	pseudobulk	up
NBPF1	1.14408	2.79897	11.3675	0.018845	0.051107	NBPF1	pseudobulk	up
TBX19	1.14228	1.89727	21.6239	0.00512381	0.0236358	TBX19	pseudobulk	up
BCAM	1.14177	0.812728	6.57476	0.0488533	0.0971408	BCAM	pseudobulk	up
ANG	1.14004	1.82424	19.4887	0.00639766	0.0266569	ANG	pseudobulk	up
GABRR2	1.13992	-1.03768	3.31839	0.126457	0.19707	GABRR2	pseudobulk	up
STK38L	1.13921	5.20707	53.1199	0.000657754	0.00846517	STK38L	pseudobulk	up
TAGLN2	1.13914	3.08473	22.2948	0.00479613	0.0226363	TAGLN2	pseudobulk	up
ACSL1	1.13781	5.42173	50.815	0.000731131	0.00889937	ACSL1	pseudobulk	up
TMCO4	1.13764	3.10404	23.1278	0.00442903	0.0217452	TMCO4	pseudobulk	up
C11orf1	1.1373	2.19006	16.6195	0.0089166	0.0322853	C11orf1	pseudobulk	up
CASP6	1.13728	2.99199	35.4527	0.00169941	0.013384	CASP6	pseudobulk	up
NT5DC1	1.1356	2.47948	14.5259	0.0117115	0.0379384	NT5DC1	pseudobulk	up
CTRL	1.13548	2.06745	24.0648	0.00406158	0.0207879	CTRL	pseudobulk	up
PDE4B	1.13389	3.97594	32.373	0.00209251	0.0148583	PDE4B	pseudobulk	up
MTMR6	1.13291	3.53457	41.8752	0.00115455	0.0111855	MTMR6	pseudobulk	up
ATOX1	1.13239	4.72166	29.8319	0.00251853	0.0163354	ATOX1	pseudobulk	up
RNLS	1.13201	2.16488	24.094	0.00405065	0.0207798	RNLS	pseudobulk	up
FLT3LG	1.13156	0.819635	12.6991	0.0152621	0.0447271	FLT3LG	pseudobulk	up
PRADC1	1.1313	2.4207	13.5997	0.0133449	0.0410762	PRADC1	pseudobulk	up
CERCAM	1.13086	2.46072	5.67913	0.0612326	0.115076	CERCAM	pseudobulk	up
IFT88	1.13026	3.72687	37.443	0.00149803	0.0126943	IFT88	pseudobulk	up
COA6	1.13019	3.0177	35.8672	0.00165452	0.0132538	COA6	pseudobulk	up
MGMT	1.12927	4.83691	38.0983	0.00143897	0.0124444	MGMT	pseudobulk	up
C2orf92	1.12863	3.50749	20.9637	0.00547604	0.0245071	C2orf92	pseudobulk	up
MMP2	1.1284	5.38835	37.2175	0.0015191	0.0127816	MMP2	pseudobulk	up
DNPEP	1.12782	4.19686	43.4921	0.00105639	0.0106694	DNPEP	pseudobulk	up
COL27A1	1.12769	1.28553	15.9021	0.00976049	0.0339849	COL27A1	pseudobulk	up
TBC1D2B	1.1268	6.49216	60.4017	0.000483268	0.00741959	TBC1D2B	pseudobulk	up
GNL1	1.12668	2.93161	19.5916	0.00632569	0.0265206	GNL1	pseudobulk	up
SEPHS2	1.12613	3.97428	28.1227	0.00287569	0.0174466	SEPHS2	pseudobulk	up
MTMR14	1.12567	3.08553	29.7116	0.00254171	0.0164421	MTMR14	pseudobulk	up
FAM167B	1.12555	-1.25973	1.07728	0.344156	0.434608	FAM167B	pseudobulk	up
TP63	1.12479	-1.24522	2.07806	0.207108	0.290964	TP63	pseudobulk	up
FAM50A	1.12462	5.73508	38.9579	0.00136632	0.0121814	FAM50A	pseudobulk	up
ARAP2	1.12304	3.00916	33.6232	0.00191914	0.0142835	ARAP2	pseudobulk	up
SGPP1	1.12301	4.64921	50.9248	0.000727392	0.00887976	SGPP1	pseudobulk	up
CRABP2	1.12293	1.00033	12.7965	0.0150343	0.0443167	CRABP2	pseudobulk	up
C6orf163	1.12186	3.51469	12.8936	0.0148099	0.0439349	C6orf163	pseudobulk	up
SOD2	1.12147	6.23803	18.7029	0.00697607	0.0280375	SOD2	pseudobulk	up
HIRA	1.12114	3.98453	44.8783	0.000981235	0.0102539	HIRA	pseudobulk	up
HUS1B	1.12088	1.46514	12.9551	0.0146764	0.0437076	HUS1B	pseudobulk	up
GALM	1.12083	4.59978	47.2881	0.00086724	0.00973966	GALM	pseudobulk	up
SETD7	1.1193	3.72975	41.9555	0.00114938	0.0111847	SETD7	pseudobulk	up
ZNF319	1.11916	1.20604	15.1559	0.010758	0.0360395	ZNF319	pseudobulk	up
MEGF9	1.11827	1.09082	12.8762	0.0148547	0.0440076	MEGF9	pseudobulk	up
ZC3H12D	1.11729	3.5505	38.7382	0.00138444	0.0122488	ZC3H12D	pseudobulk	up
NOXRED1	1.11673	-0.484417	2.30127	0.18801	0.269264	NOXRED1	pseudobulk	up
MGAT4A	1.11609	7.10829	62.6676	0.000442171	0.00719617	MGAT4A	pseudobulk	up
CYP21A2	1.11602	-0.631	4.39566	0.0885252	0.150463	CYP21A2	pseudobulk	up
CMC2	1.11536	3.5229	28.6435	0.00275984	0.017199	CMC2	pseudobulk	up
USP30	1.11519	3.13838	31.234	0.00227007	0.0155672	USP30	pseudobulk	up
IER2	1.11494	5.96298	50.6649	0.000736297	0.00891343	IER2	pseudobulk	up
RNF227	1.11425	2.88978	13.7168	0.0131213	0.0406439	RNF227	pseudobulk	up
SMIM19	1.11282	3.58033	27.7643	0.0029594	0.0176995	SMIM19	pseudobulk	up
PRDM13	1.11179	0.414235	2.26618	0.190736	0.272182	PRDM13	pseudobulk	up
RAC2	1.11131	3.5062	37.9289	0.00145398	0.0125096	RAC2	pseudobulk	up
DNHD1	1.1113	3.17071	30.9101	0.00232437	0.0157003	DNHD1	pseudobulk	up
UNC5C	1.11126	-1.23238	0.684997	0.441459	0.53058	UNC5C	pseudobulk	up
NDST1	1.11066	3.07224	33.6928	0.00191008	0.0142821	NDST1	pseudobulk	up
TMCC3	1.11061	4.13011	40.1878	0.00127098	0.0117383	TMCC3	pseudobulk	up
ZNF324B	1.11053	-1.18048	2.61693	0.164905	0.24301	ZNF324B	pseudobulk	up
AC021097.2	1.11052	-0.88833	2.70823	0.158999	0.236137	AC021097.2	pseudobulk	up
PTGS2	1.11032	0.26511	5.2921	0.0681854	0.124207	PTGS2	pseudobulk	up
MFSD5	1.11013	1.01864	10.0254	0.0237872	0.0592523	MFSD5	pseudobulk	up
NRBP2	1.1081	5.47196	51.6764	0.000702439	0.00873864	NRBP2	pseudobulk	up
CBLB	1.10793	4.76818	35.5681	0.00168666	0.0133411	CBLB	pseudobulk	up
LEKR1	1.10764	-0.92935	1.93747	0.221093	0.306242	LEKR1	pseudobulk	up
FAM83H	1.10654	2.21371	24.0261	0.00407567	0.0208303	FAM83H	pseudobulk	up
SNX6	1.10559	5.25468	52.3867	0.00067994	0.0085926	SNX6	pseudobulk	up
SPHK1	1.10538	4.00061	41.7087	0.00116535	0.0112002	SPHK1	pseudobulk	up
GPI	1.10427	3.31994	26.4467	0.00329799	0.0186795	GPI	pseudobulk	up
PFKFB4	1.10395	2.11306	23.1396	0.00442452	0.0217452	PFKFB4	pseudobulk	up
PRELID2	1.10331	3.76251	29.2952	0.00262375	0.0167187	PRELID2	pseudobulk	up
FOS	1.10268	4.08128	5.33614	0.0671669	0.123108	FOS	pseudobulk	up
NFU1	1.10202	3.65323	19.0061	0.00674415	0.0274553	NFU1	pseudobulk	up
EEF1G	1.10163	5.59874	15.5422	0.0102217	0.0349745	EEF1G	pseudobulk	up
PTPN1	1.10149	4.93058	46.7793	0.000889706	0.00984706	PTPN1	pseudobulk	up
C17orf97	1.1014	2.0992	2.68732	0.160125	0.237296	C17orf97	pseudobulk	up
WDR81	1.10098	6.38489	36.6228	0.00157673	0.0129751	WDR81	pseudobulk	up
UCN	1.10066	2.12928	23.6119	0.00423373	0.0212432	UCN	pseudobulk	up
PEX10	1.10048	2.76724	21.0204	0.00544452	0.024446	PEX10	pseudobulk	up
SCP2	1.09839	5.20269	23.8566	0.00413891	0.0209678	SCP2	pseudobulk	up
ARL11	1.09689	4.77319	38.4534	0.00140834	0.0123183	ARL11	pseudobulk	up
HIF1A	1.09625	3.88978	36.3184	0.00160747	0.0130619	HIF1A	pseudobulk	up
DST	1.09486	5.63614	32.0937	0.00213416	0.0150058	DST	pseudobulk	up
CAMLG	1.0947	3.35883	30.847	0.00233515	0.0157324	CAMLG	pseudobulk	up
TEX2	1.09443	4.466	34.4509	0.00181504	0.0139413	TEX2	pseudobulk	up
RAB38	1.09418	1.78357	17.7926	0.00774466	0.0297872	RAB38	pseudobulk	up
FAM177A1	1.09396	3.21553	33.2716	0.00196582	0.0144446	FAM177A1	pseudobulk	up
CNKSR1	1.09396	0.14626	7.97262	0.0356774	0.0777669	CNKSR1	pseudobulk	up
LENG9	1.09355	2.33487	24.6324	0.00385885	0.0202072	LENG9	pseudobulk	up
TESK2	1.09342	2.50869	13.4793	0.0135799	0.0415086	TESK2	pseudobulk	up
MT-ND1	1.09338	5.32043	16.644	0.0088888	0.032204	MT-ND1	pseudobulk	up
SLC16A5	1.09334	3.05857	28.4786	0.00279585	0.0172781	SLC16A5	pseudobulk	up
PIP4K2C	1.09326	3.46632	36.0705	0.00163306	0.0131325	PIP4K2C	pseudobulk	up
RBM47	1.09312	6.25421	11.8179	0.0175089	0.0489274	RBM47	pseudobulk	up
POR	1.09308	3.49412	16.2496	0.00933677	0.0332183	POR	pseudobulk	up
TK2	1.09292	5.43228	50.192	0.000752907	0.00899765	TK2	pseudobulk	up
DTWD2	1.09271	1.56714	17.0988	0.00841051	0.0312342	DTWD2	pseudobulk	up
LNP1	1.09233	-0.486843	4.27025	0.091977	0.154957	LNP1	pseudobulk	up
MGAT4B	1.09176	5.6883	46.4029	0.000906856	0.00988679	MGAT4B	pseudobulk	up
MDH1	1.08991	2.66758	21.9343	0.00496824	0.0231804	MDH1	pseudobulk	up
SLC10A3	1.08954	3.04645	20.5657	0.00570529	0.025028	SLC10A3	pseudobulk	up
CMTM1	1.0895	0.500309	4.41981	0.087668	0.149454	CMTM1	pseudobulk	up
KIAA1841	1.08928	4.22992	45.3087	0.000959409	0.0101461	KIAA1841	pseudobulk	up
NMI	1.08752	3.89127	13.4991	0.0135403	0.04145	NMI	pseudobulk	up
RMND1	1.08747	3.87264	38.0161	0.00144623	0.0124659	RMND1	pseudobulk	up
MASTL	1.08667	3.74181	26.7005	0.00322866	0.0185042	MASTL	pseudobulk	up
STK40	1.08584	4.5825	35.8091	0.00166063	0.0132575	STK40	pseudobulk	up
COA7	1.08579	2.11562	21.8637	0.00500322	0.0232687	COA7	pseudobulk	up
DDX28	1.08567	2.42341	12.3822	0.0160157	0.0461621	DDX28	pseudobulk	up
AVIL	1.08556	2.57415	21.4249	0.00522652	0.0239068	AVIL	pseudobulk	up
SARS	1.08554	2.51715	26.4423	0.00329933	0.0186795	SARS	pseudobulk	up
BPHL	1.08545	3.6761	36.7954	0.00155973	0.0128826	BPHL	pseudobulk	up
C17orf107	1.08479	0.324403	9.20192	0.0277539	0.0654473	C17orf107	pseudobulk	up
LAMB3	1.08347	-1.37805	0.851877	0.393128	0.482445	LAMB3	pseudobulk	up
AMDHD2	1.08303	6.66759	25.3037	0.00363662	0.0195864	AMDHD2	pseudobulk	up
ZNF230	1.08219	0.571173	6.34195	0.0517076	0.101578	ZNF230	pseudobulk	up
AHCTF1	1.08207	-0.435768	4.46374	0.0866112	0.148019	AHCTF1	pseudobulk	up
GOLIM4	1.08127	4.25001	35.5324	0.00169058	0.0133628	GOLIM4	pseudobulk	up
VWA8	1.08087	4.23476	37.4221	0.00149996	0.0126943	VWA8	pseudobulk	up
IFI27L2	1.08043	3.21665	34.6696	0.00178893	0.0138299	IFI27L2	pseudobulk	up
FMN1	1.08023	6.07161	49.2895	0.000786075	0.00921267	FMN1	pseudobulk	up
MOV10	1.07975	6.11359	41.943	0.00115014	0.0111847	MOV10	pseudobulk	up
ZNRD1	1.07949	2.71529	28.6307	0.00276272	0.017199	ZNRD1	pseudobulk	up
KCTD21	1.07878	1.31546	14.4652	0.0118119	0.0381077	KCTD21	pseudobulk	up
DUS3L	1.07755	5.25125	51.2348	0.00071695	0.00880815	DUS3L	pseudobulk	up
CHRAC1	1.07728	2.56736	26.5712	0.0032639	0.0185816	CHRAC1	pseudobulk	up
MICU1	1.07699	4.08557	14.8808	0.0111585	0.0367447	MICU1	pseudobulk	up
GRK6	1.07667	3.72968	37.0844	0.00153177	0.0128127	GRK6	pseudobulk	up
ZC2HC1C	1.076	0.161036	3.9183	0.102788	0.168372	ZC2HC1C	pseudobulk	up
GCH1	1.0757	1.3078	12.9294	0.0147348	0.0438015	GCH1	pseudobulk	up
PHEX	1.07554	-0.472199	3.84054	0.105638	0.171742	PHEX	pseudobulk	up
PLOD3	1.07552	4.95026	49.0443	0.000795437	0.00925175	PLOD3	pseudobulk	up
CNP	1.07527	4.16644	36.9867	0.00154114	0.0128428	CNP	pseudobulk	up
NEIL2	1.07469	2.75077	11.0971	0.0197154	0.0525932	NEIL2	pseudobulk	up
NR1H2	1.07196	4.05223	31.7777	0.00218277	0.0151921	NR1H2	pseudobulk	up
C16orf86	1.07164	2.98975	28.4335	0.00280584	0.0172963	C16orf86	pseudobulk	up
ATG14	1.07133	4.77162	24.6132	0.00386508	0.020208	ATG14	pseudobulk	up
PTPRE	1.07126	5.98517	53.3875	0.000649904	0.00843905	PTPRE	pseudobulk	up
RUSC1	1.06954	3.73083	35.431	0.00170175	0.0133943	RUSC1	pseudobulk	up
BTBD8	1.06927	2.94998	22.5285	0.00468899	0.0223734	BTBD8	pseudobulk	up
SUMF1	1.06891	4.61991	45.4811	0.000950839	0.0100735	SUMF1	pseudobulk	up
CENPBD1	1.06712	2.83508	29.5682	0.00256962	0.0165542	CENPBD1	pseudobulk	up
SEPTIN10	1.06701	2.84542	26.4161	0.0033065	0.0187045	SEPTIN10	pseudobulk	up
ZNF697	1.06691	2.8627	13.1506	0.014252	0.0428743	ZNF697	pseudobulk	up
RAPGEFL1	1.0667	2.36994	21.899	0.00498573	0.0232205	RAPGEFL1	pseudobulk	up
TBKBP1	1.06631	4.00329	38.3194	0.00141982	0.012353	TBKBP1	pseudobulk	up
CEP120	1.06558	4.3772	41.4902	0.00117975	0.011279	CEP120	pseudobulk	up
PGD	1.06509	4.82119	30.0915	0.00246978	0.0161956	PGD	pseudobulk	up
SPATS2	1.06458	3.53652	25.9617	0.00343608	0.0190681	SPATS2	pseudobulk	up
MYBBP1A	1.06396	4.84011	47.8238	0.000844412	0.00955731	MYBBP1A	pseudobulk	up
ARPIN	1.063	6.62953	26.0042	0.00342358	0.0190199	ARPIN	pseudobulk	up
MPG	1.06185	3.08115	25.5261	0.00356718	0.0194066	MPG	pseudobulk	up
MARVELD3	1.06159	1.16753	13.6153	0.0133173	0.0410373	MARVELD3	pseudobulk	up
PNPLA4	1.06117	0.35048	5.2377	0.0690544	0.125353	PNPLA4	pseudobulk	up
ETFBKMT	1.06098	1.84123	18.57	0.00708222	0.0282899	ETFBKMT	pseudobulk	up
PHPT1	1.06086	5.61109	38.8331	0.00137655	0.0122287	PHPT1	pseudobulk	up
GSTK1	1.06065	6.54766	44.6992	0.000990501	0.0103078	GSTK1	pseudobulk	up
LRPAP1	1.06063	6.4134	27.7812	0.0029553	0.0176883	LRPAP1	pseudobulk	up
USP54	1.05987	1.49888	10.1457	0.0232701	0.0584102	USP54	pseudobulk	up
ARFGAP3	1.05959	4.1406	36.073	0.00163277	0.0131325	ARFGAP3	pseudobulk	up
MAP3K7CL	1.05944	1.89165	18.5821	0.00707264	0.0282689	MAP3K7CL	pseudobulk	up
MYBPHL	1.05938	-0.836668	3.5727	0.115641	0.184008	MYBPHL	pseudobulk	up
IARS	1.05938	3.1859	32.021	0.00214529	0.0150517	IARS	pseudobulk	up
SLC52A2	1.05862	3.29067	34.1112	0.00185682	0.0140914	SLC52A2	pseudobulk	up
IQCG	1.0583	4.1487	30.4835	0.00239859	0.0159595	IQCG	pseudobulk	up
FAHD2B	1.05747	0.412693	6.59449	0.048627	0.0968385	FAHD2B	pseudobulk	up
TMED5	1.05626	3.67192	29.5005	0.00258282	0.0166038	TMED5	pseudobulk	up
ATP8B3	1.05528	2.71042	24.978	0.00374222	0.0198498	ATP8B3	pseudobulk	up
ABHD6	1.05503	3.04538	31.1544	0.00228325	0.0156068	ABHD6	pseudobulk	up
PTRH1	1.05495	2.9854	22.4192	0.00473869	0.0224749	PTRH1	pseudobulk	up
ACOT13	1.05455	3.10127	31.3654	0.00224858	0.0154932	ACOT13	pseudobulk	up
ZMIZ2	1.05445	6.43109	33.7735	0.00189954	0.0142462	ZMIZ2	pseudobulk	up
ZNF672	1.05419	3.19596	30.2191	0.00244637	0.0161324	ZNF672	pseudobulk	up
TAGAP	1.05402	5.82693	44.981	0.000975945	0.010238	TAGAP	pseudobulk	up
SLC25A25	1.05374	4.29503	20.7435	0.00560113	0.0248303	SLC25A25	pseudobulk	up
LAIR1	1.05258	7.52314	38.1866	0.00143127	0.0124025	LAIR1	pseudobulk	up
B3GNT10	1.05204	1.91056	19.9014	0.0061192	0.0259946	B3GNT10	pseudobulk	up
NMD3	1.05179	4.21665	40.5083	0.00124764	0.0116022	NMD3	pseudobulk	up
[truncated: 11,051 more rows]

## Sheet: deg_spot_results_all_8_11_2025 
Gene	p_val	avg_log2FC	pct.1	pct.2	p_val_adj	gene	type	regulation
CLIP4	1.30330771310372e-302	10.578	0.14	0	1.82228484446162e-298	CLIP4	Spot	up
LSR	4.81656569979846e-234	10.072	0.11	0	6.7345221614582e-230	LSR	Spot	up
CR1	2.62303460937866e-148	9.50205	0.071	0	3.66752699083325e-144	CR1	Spot	up
CD109	4.6070795058754e-146	9.40937	0.069	0	6.44161856511498e-142	CD109	Spot	up
ESR1	7.99799337645834e-139	9.33693	0.066	0	1.1182794338964e-134	ESR1	Spot	up
TDRD9	3.40108115738864e-121	9.2403	0.058	0	4.7553916742608e-117	TDRD9	Spot	up
VNN2	4.15950820098956e-132	9.23259	0.063	0	5.81582436662361e-128	VNN2	Spot	up
LY9	1.1094880915842e-122	9.21183	0.059	0	1.55128624965303e-118	LY9	Spot	up
EVC	2.74363567864543e-114	9.0575	0.055	0	3.83615140588204e-110	EVC	Spot	up
TVP23A	2.73879677183306e-114	9.04582	0.055	0	3.82938564637698e-110	TVP23A	Spot	up
DNAJC5B	6.10110053753207e-105	8.96439	0.05	0	8.53055877157734e-101	DNAJC5B	Spot	up
AIM2	3.31986540395302e-104	8.93936	0.05	0	4.64183580780711e-100	AIM2	Spot	up
OTOA	1.06855583817586e-104	8.90421	0.05	0	1.49405477293748e-100	OTOA	Spot	up
TRIB3	1.65153739385894e-101	8.88794	0.048	0	2.30917958409357e-97	TRIB3	Spot	up
TM4SF19	1.96159510224974e-93	8.87149	0.045	0	2.74270227196558e-89	TM4SF19	Spot	up
SERPINE1	1.56317001572947e-89	8.70693	0.043	0	2.18562431599294e-85	SERPINE1	Spot	up
TMEM26	3.05816274843784e-91	8.66936	0.044	0	4.27592315486579e-87	TMEM26	Spot	up
IFNLR1	2.15536213430824e-85	8.61506	0.041	0	3.01362733618978e-81	IFNLR1	Spot	up
HOXB2	6.61283122177735e-85	8.61506	0.041	0	9.24606061428909e-81	HOXB2	Spot	up
EMP1	5.13221803692717e-81	8.60315	0.039	0	7.17586725923156e-77	EMP1	Spot	up
LRRC75B	3.33181012306957e-83	8.58309	0.04	0	4.65853691407587e-79	LRRC75B	Spot	up
CES1	4.19936575790088e-78	8.58309	0.037	0	5.87155320269701e-74	CES1	Spot	up
ADTRP	9.57733440683256e-82	8.57498	0.039	0	1.33910289676333e-77	ADTRP	Spot	up
TRIB2	9.56352148837711e-82	8.5421	0.039	0	1.33717157450489e-77	TRIB2	Spot	up
CHRNA6	1.56783998710377e-80	8.53794	0.038	0	2.19215386996849e-76	CHRNA6	Spot	up
NT5DC4	2.92443762244883e-81	8.52116	0.039	0	4.08894868370796e-77	NT5DC4	Spot	up
INPP5J	1.46435400059829e-79	8.48269	0.038	0	2.04745976363652e-75	INPP5J	Spot	up
CYP27A1	0	8.43789	0.323	0.002	8.08915476254717e-305	CYP27A1	Spot	up
DNASE2B	5.13197537736815e-73	8.41619	0.035	0	7.17552797263615e-69	DNASE2B	Spot	up
ALKAL2	4.76731758398526e-72	8.41165	0.034	0	6.66566344592819e-68	ALKAL2	Spot	up
SERINC2	7.14711740286342e-70	8.33213	0.033	0	9.99309955268364e-66	SERINC2	Spot	up
ATP8B1	6.61526785800949e-69	8.30298	0.033	0	9.24946751906887e-65	ATP8B1	Spot	up
MLPH	0	8.29971	0.21	0.001	8.08915476254717e-305	MLPH	Spot	up
MMP9	1.10540848952085e-27	8.25813	0.013	0	1.54558215004806e-23	MMP9	Spot	up
RAB17	1.58613869476165e-65	8.21183	0.031	0	2.21773912301573e-61	RAB17	Spot	up
NEURL3	8.39447902170181e-65	8.19607	0.031	0	1.17371605681435e-60	NEURL3	Spot	up
MEIKIN	3.76404144109247e-62	8.15859	0.03	0	5.26288274293549e-58	MEIKIN	Spot	up
CD52	9.63379242212145e-60	8.12568	0.028	0	1.34699685646102e-55	CD52	Spot	up
FCAR	2.91700680634499e-59	8.09766	0.028	0	4.07855891663157e-55	FCAR	Spot	up
FLNB	1.04829881866912e-60	8.09199	0.029	0	1.46573140826316e-56	FLNB	Spot	up
B3GNT7	1.8249251105318e-60	8.09199	0.029	0	2.55161028954557e-56	B3GNT7	Spot	up
SAMD12	1.67577639258255e-59	8.09199	0.028	0	2.34307055210893e-55	SAMD12	Spot	up
DDO	1.53671363775631e-58	8.0575	0.028	0	2.14863300831087e-54	DDO	Spot	up
PRLR	8.82960549362381e-59	8.05168	0.028	0	1.23455544011848e-54	PRLR	Spot	up
RTN4R	4.26103937260709e-57	8.02812	0.027	0	5.95778525077923e-53	RTN4R	Spot	up
HOXB4	1.56131895646573e-52	7.99813	0.025	0	2.18303616493039e-48	HOXB4	Spot	up
CELSR1	2.05000712745449e-55	7.96129	0.026	0	2.86631996560687e-51	CELSR1	Spot	up
PPIC	6.19858687408958e-55	7.96129	0.026	0	8.66686416735205e-51	PPIC	Spot	up
IL7	1.07776824995477e-54	7.96129	0.026	0	1.50693556708676e-50	IL7	Spot	up
KCTD15	1.71067928522844e-53	7.9362	0.025	0	2.39187177660641e-49	KCTD15	Spot	up
ZBED6CL	2.47080796605556e-51	7.8582	0.024	0	3.45468369813888e-47	ZBED6CL	Spot	up
MCOLN3	6.78939147039342e-50	7.8582	0.024	0	9.49292715390408e-46	MCOLN3	Spot	up
WHRN	3.90761698479401e-50	7.84477	0.024	0	5.46363006813898e-46	WHRN	Spot	up
FER1L6	3.90814454740125e-50	7.83802	0.024	0	5.46436770617643e-46	FER1L6	Spot	up
RARRES1	5.60835022270354e-48	7.76152	0.023	0	7.8415952813841e-44	RARRES1	Spot	up
TREM1	2.93415425955048e-47	7.74716	0.022	0	4.10253448570348e-43	TREM1	Spot	up
NLRP12	2.93380124769636e-47	7.73266	0.022	0	4.10204090452905e-43	NLRP12	Spot	up
CLEC2B	0	7.67316	0.197	0.001	8.08915476254717e-305	CLEC2B	Spot	up
MANSC4	2.41395625665747e-45	7.66555	0.021	0	3.37519363805847e-41	MANSC4	Spot	up
C3orf84	7.26773608345066e-45	7.66555	0.021	0	1.01617485918807e-40	C3orf84	Spot	up
CCL18	3.10785195879993e-42	7.63469	0.02	0	4.34539860879406e-38	CCL18	Spot	up
VWF	1.14175080895099e-43	7.61901	0.021	0	1.59639598107527e-39	VWF	Spot	up
ALOX15B	5.83102998529951e-227	7.61374	0.108	0.001	8.15294612544578e-223	ALOX15B	Spot	up
ALK	8.44328165561515e-41	7.57091	0.019	0	1.18053964108811e-36	ALK	Spot	up
ADGRE3	5.38738817372496e-42	7.55452	0.02	0	7.53264614450223e-38	ADGRE3	Spot	up
COL6A1	3.10638346336436e-42	7.54625	0.02	0	4.34334535847605e-38	COL6A1	Spot	up
CD22	1.28089951146629e-228	7.53555	0.109	0.001	1.79095369693216e-224	CD22	Spot	up
OSBPL5	1.4633942696305e-40	7.52116	0.019	0	2.04611786779737e-36	OSBPL5	Spot	up
ADAMDEC1	1.1824179768503e-277	7.50098	0.131	0.001	1.65325681523209e-273	ADAMDEC1	Spot	up
NXF3	4.86785537195199e-41	7.48701	0.019	0	6.80623538106328e-37	NXF3	Spot	up
ZFP57	1.4631342228481e-40	7.48701	0.019	0	2.04575427038621e-36	ZFP57	Spot	up
EMP2	4.3963674852491e-40	7.46963	0.019	0	6.14700101787528e-36	EMP2	Spot	up
SLC6A16	7.62111740409535e-40	7.46963	0.019	0	1.06558463544061e-35	SLC6A16	Spot	up
TGFA	2.28965931627156e-39	7.46963	0.019	0	3.2014016560109e-35	TGFA	Spot	up
WBP2NL	1.1919424387371e-38	7.46963	0.018	0	1.66657391784221e-34	WBP2NL	Spot	up
CHRNA1	3.96826407831607e-39	7.46086	0.018	0	5.54842683430153e-35	CHRNA1	Spot	up
SARDH	3.22619292266355e-37	7.46086	0.017	0	4.51086294446818e-33	SARDH	Spot	up
LIF	1.1917565988084e-38	7.44316	0.018	0	1.6663140764539e-34	LIF	Spot	up
KLHDC7B	5.58795960388886e-37	7.40709	0.017	0	7.8130851181574e-33	KLHDC7B	Spot	up
SAMD13	6.20071435940124e-38	7.39793	0.018	0	8.66983881731482e-34	SAMD13	Spot	up
ANK2	1.07439289859848e-37	7.38871	0.018	0	1.50221615082039e-33	ANK2	Spot	up
GDF15	5.58815860358409e-37	7.38871	0.017	0	7.81336335953128e-33	GDF15	Spot	up
PLEK2	5.03249409518326e-36	7.38871	0.017	0	7.03643324388523e-32	PLEK2	Spot	up
NMRK2	2.11529332225565e-33	7.37009	0.016	0	2.95760312317785e-29	NMRK2	Spot	up
SLC9A7	2.76246879743595e-302	7.32355	0.142	0.001	3.86248387257495e-298	SLC9A7	Spot	up
CRTAM	2.61480311936228e-35	7.30298	0.017	0	3.65601772149233e-31	CRTAM	Spot	up
TAF4B	8.71519764786833e-36	7.29313	0.017	0	1.21855893512495e-31	TAF4B	Spot	up
SIGLEC15	4.52854250500794e-35	7.28322	0.016	0	6.33180813050211e-31	SIGLEC15	Spot	up
CEP170B	2.35236003538954e-34	7.28322	0.016	0	3.28906980148166e-30	CEP170B	Spot	up
NCR3LG1	6.33966916011834e-33	7.20134	0.015	0	8.86412541967747e-29	NCR3LG1	Spot	up
ZNF835	1.09757334529458e-32	7.18012	0.015	0	1.53462705139089e-28	ZNF835	Spot	up
CR1L	5.69534363934474e-32	7.18012	0.015	0	7.96322947653182e-28	CR1L	Spot	up
ALDH1A1	0	7.17911	0.225	0.002	8.08915476254717e-305	ALDH1A1	Spot	up
SSC4D	6.33892684007861e-33	7.15859	0.015	0	8.86308750779792e-29	SSC4D	Spot	up
CCL28	5.694892841261e-32	7.1477	0.015	0	7.96259917065112e-28	CCL28	Spot	up
NAALADL1	1.53197396577969e-30	7.12568	0.014	0	2.14200599895317e-26	NAALADL1	Spot	up
CPA6	4.58897444159539e-30	7.08059	0.014	0	6.41630406423867e-26	CPA6	Spot	up
RASGRF1	1.53182631164548e-30	7.06909	0.014	0	2.14179954894271e-26	RASGRF1	Spot	up
PTK6	4.58886860739817e-30	7.06909	0.014	0	6.41615608686412e-26	PTK6	Spot	up
DUSP4	1.37449034886279e-29	7.0575	0.014	0	1.92181240577995e-25	DUSP4	Spot	up
MACC1	0	7.04943	0.164	0.001	8.08915476254717e-305	MACC1	Spot	up
CCDC36	7.94134657121008e-30	7.02217	0.014	0	1.11035907758659e-25	CCDC36	Spot	up
METTL7B	7.94115350404948e-30	7.0102	0.014	0	1.1103320829362e-25	METTL7B	Spot	up
S100A10	1.42831407552388e-254	6.99813	0.122	0.001	1.99706874039749e-250	S100A10	Spot	up
RGS13	4.11607218176196e-29	6.98595	0.014	0	5.75509212453957e-25	RGS13	Spot	up
CMBL	2.1330432666926e-28	6.98595	0.013	0	2.98242109548959e-24	CMBL	Spot	up
S1PR1	1.23259302992611e-28	6.96129	0.013	0	1.72341157444269e-24	S1PR1	Spot	up
SLAMF6	1.91216029388932e-27	6.96129	0.013	0	2.67358252291605e-23	SLAMF6	Spot	up
SLC46A2	1.91212494542561e-27	6.9488	0.013	0	2.67353309869408e-23	SLC46A2	Spot	up
KMO	1.051746515721e-151	6.93197	0.074	0.001	1.47055197828111e-147	KMO	Spot	up
AC008687.4	3.30835331649999e-27	6.92349	0.013	0	4.62573960713029e-23	AC008687.4	Spot	up
GOLGA8B	1.10501766412481e-27	6.91066	0.013	0	1.54503569797931e-23	GOLGA8B	Spot	up
DCSTAMP	2.96459663922256e-26	6.91066	0.012	0	4.14509902096099e-22	DCSTAMP	Spot	up
FPR3	0	6.90303	0.232	0.002	8.08915476254717e-305	FPR3	Spot	up
CLEC12B	9.90343676647105e-27	6.88467	0.012	0	1.38469852868798e-22	CLEC12B	Spot	up
LRRC63	5.12887500274585e-26	6.88467	0.012	0	7.17119302883925e-22	LRRC63	Spot	up
CAMP	2.96444780063039e-26	6.87149	0.012	0	4.14489091484141e-22	CAMP	Spot	up
MCF2L2	2.96444780063039e-26	6.87149	0.012	0	4.14489091484141e-22	MCF2L2	Spot	up
KRT36	1.71336131876564e-26	6.84477	0.012	0	2.39562179589812e-22	KRT36	Spot	up
TXK	1.53502435134822e-25	6.84477	0.012	0	2.14627104805508e-21	TXK	Spot	up
SNTA1	8.87273394843973e-26	6.83123	0.012	0	1.24058566067084e-21	SNTA1	Spot	up
NKAPL	5.1284362772145e-26	6.81755	0.012	0	7.17057960280131e-22	NKAPL	Spot	up
BEAN1	4.95113783849899e-147	6.81165	0.072	0.001	6.92268092578929e-143	BEAN1	Spot	up
CDC42EP1	2.65549539663771e-25	6.80375	0.012	0	3.71291366357885e-21	CDC42EP1	Spot	up
HOXB6	8.8722688960307e-26	6.78981	0.012	0	1.24052063704301e-21	HOXB6	Spot	up
MMP19	4.59385650588254e-25	6.76152	0.012	0	6.42313016652497e-21	MMP19	Spot	up
GREB1	7.9472762371201e-25	6.76152	0.011	0	1.11118816347413e-20	GREB1	Spot	up
ITPR3	7.9472762371201e-25	6.76152	0.011	0	1.11118816347413e-20	ITPR3	Spot	up
EVA1C	1.37484557107748e-24	6.76152	0.011	0	1.92230907748053e-20	EVA1C	Spot	up
FCGR2B	1.04503393445848e-232	6.75632	0.112	0.001	1.46116644715984e-228	FCGR2B	Spot	up
CCDC152	1.37480265886534e-24	6.73266	0.011	0	1.92224907762552e-20	CCDC152	Spot	up
ENDOD1	4.11432642399402e-24	6.73266	0.011	0	5.75265120602844e-20	ENDOD1	Spot	up
LRRC61	2.12989699010502e-23	6.73266	0.011	0	2.97802197156484e-19	LRRC61	Spot	up
CAPN12	4.11426556899475e-24	6.71802	0.011	0	5.75256611856846e-20	CAPN12	Spot	up
TRIM63	1.23122039835274e-23	6.71802	0.011	0	1.7214923609768e-19	TRIM63	Spot	up
PODXL2	7.11720478512011e-24	6.70322	0.011	0	9.95127573055494e-20	PODXL2	Spot	up
NR1I2	1.2311859327715e-23	6.68827	0.011	0	1.72144417120111e-19	NR1I2	Spot	up
HTRA4	0	6.67864	0.242	0.004	8.08915476254717e-305	HTRA4	Spot	up
KLF8	1.10248398209414e-22	6.67316	0.01	0	1.54149310376402e-18	KLF8	Spot	up
NHS	6.37305567459146e-23	6.64247	0.01	0	8.91080644421378e-19	NHS	Spot	up
CLEC4F	5.7068329180747e-22	6.62687	0.01	0	7.97929378605205e-18	CLEC4F	Spot	up
KLHL30	9.87221718069501e-22	6.62687	0.01	0	1.38033340620478e-17	KLHL30	Spot	up
STBD1	6.3729673681441e-23	6.6111	0.01	0	8.91068297413908e-19	STBD1	Spot	up
CSMD1	6.3729673681441e-23	6.6111	0.01	0	8.91068297413908e-19	CSMD1	Spot	up
HOXC4	3.29895342540574e-22	6.6111	0.01	0	4.61259667940231e-18	HOXC4	Spot	up
PYHIN1	1.70772274116329e-21	6.6111	0.01	0	2.38773793669452e-17	PYHIN1	Spot	up
KLRK1	5.70676572855029e-22	6.59516	0.01	0	7.97919984165901e-18	KLRK1	Spot	up
CIART	1.70774130556307e-21	6.59516	0.01	0	2.38776389343829e-17	CIART	Spot	up
TMEM204	1.70774130556307e-21	6.59516	0.01	0	2.38776389343829e-17	TMEM204	Spot	up
UTS2	3.29891170908621e-22	6.57904	0.01	0	4.61253835164433e-18	UTS2	Spot	up
ZP3	1.70770358611892e-21	6.56274	0.01	0	2.38771115411147e-17	ZP3	Spot	up
PDE3A	1.70770358611892e-21	6.56274	0.01	0	2.38771115411147e-17	PDE3A	Spot	up
COL24A1	2.9540505420853e-21	6.5127	0.01	0	4.13035346794366e-17	COL24A1	Spot	up
ZNF681	5.11024773082409e-21	6.5127	0.01	0	7.14514837723824e-17	ZNF681	Spot	up
GMPR	1.15440503003018e-112	6.50987	0.055	0.001	1.6140891129882e-108	GMPR	Spot	up
LGALS3BP	0	6.50811	0.509	0.009	8.08915476254717e-305	LGALS3BP	Spot	up
ZBP1	0	6.42524	0.194	0.003	8.08915476254717e-305	ZBP1	Spot	up
ACP5	0	6.41537	0.329	0.007	8.08915476254717e-305	ACP5	Spot	up
CCDC78	3.85454813002208e-121	6.37544	0.06	0.001	5.38942919539688e-117	CCDC78	Spot	up
IFI27	0	6.37421	0.304	0.004	8.08915476254717e-305	IFI27	Spot	up
IFI44L	0	6.33245	0.48	0.01	8.08915476254717e-305	IFI44L	Spot	up
LY6E	0	6.31788	0.254	0.003	8.08915476254717e-305	LY6E	Spot	up
SDS	0	6.30992	0.291	0.006	8.08915476254717e-305	SDS	Spot	up
GPNMB	0	6.30666	0.766	0.036	8.08915476254717e-305	GPNMB	Spot	up
CSTA	1.2267718108669e-99	6.27323	0.049	0.001	1.71527234595411e-95	CSTA	Spot	up
STEAP3	9.4974317767399e-272	6.26654	0.131	0.002	1.32793091102377e-267	STEAP3	Spot	up
PROC	7.75017287027533e-205	6.24869	0.1	0.001	1.0836291707219e-200	PROC	Spot	up
AHNAK	0	6.18068	0.521	0.011	8.08915476254717e-305	AHNAK	Spot	up
JHY	2.94025164791752e-105	6.1477	0.052	0.001	4.11105985411827e-101	JHY	Spot	up
SLC6A12	2.13959033769423e-88	6.12197	0.044	0.001	2.99157521016408e-84	SLC6A12	Spot	up
TPRG1	0	6.10244	0.16	0.002	8.08915476254717e-305	TPRG1	Spot	up
CD72	3.73823331279134e-216	6.09766	0.106	0.002	5.22679781794485e-212	CD72	Spot	up
HSH2D	3.68836087878713e-117	6.01287	0.058	0.001	5.15706618072016e-113	HSH2D	Spot	up
BEX3	1.72129996935122e-230	5.95575	0.113	0.002	2.40672161714688e-226	BEX3	Spot	up
SLCO3A1	9.6330047449468e-60	5.83666	0.03	0	1.34688672343846e-55	SLCO3A1	Spot	up
SLAMF8	1.53358831341471e-306	5.82415	0.148	0.002	2.14426317981644e-302	SLAMF8	Spot	up
ZNF185	5.11189273752477e-78	5.73474	0.039	0.001	7.14744842560713e-74	ZNF185	Spot	up
CLEC5A	0	5.71339	0.205	0.005	8.08915476254717e-305	CLEC5A	Spot	up
GBP3	1.55321663089023e-110	5.71212	0.056	0.001	2.17170749331072e-106	GBP3	Spot	up
FAM24B	4.45247669791971e-76	5.69256	0.038	0.001	6.22545291903134e-72	FAM24B	Spot	up
SCIN	0	5.68752	0.175	0.004	8.08915476254717e-305	SCIN	Spot	up
ANXA1	0	5.67885	0.16	0.003	8.08915476254717e-305	ANXA1	Spot	up
SNTB1	5.03938686015538e-127	5.6579	0.064	0.001	7.04607070786925e-123	SNTB1	Spot	up
CD9	0	5.65025	0.467	0.015	8.08915476254717e-305	CD9	Spot	up
RUFY4	1.16752178867851e-252	5.60884	0.125	0.003	1.63242896493029e-248	RUFY4	Spot	up
KANK1	4.16043949299858e-90	5.60581	0.046	0.001	5.81712649911061e-86	KANK1	Spot	up
STAP1	3.64924107574333e-76	5.57091	0.039	0.001	5.10236887210433e-72	STAP1	Spot	up
CLEC12A	4.45734472206435e-87	5.55543	0.044	0.001	6.23225939039038e-83	CLEC12A	Spot	up
PNPLA3	6.42307924884579e-102	5.54172	0.052	0.001	8.98074940573619e-98	PNPLA3	Spot	up
SLC47A1	0	5.53907	0.294	0.008	8.08915476254717e-305	SLC47A1	Spot	up
PKD2L1	5.14457118428999e-193	5.49413	0.097	0.002	7.19313942987426e-189	PKD2L1	Spot	up
IFI6	0	5.48014	0.622	0.028	8.08915476254717e-305	IFI6	Spot	up
HES4	7.1079371398015e-85	5.45381	0.043	0.001	9.93831770887045e-81	HES4	Spot	up
LILRA6	3.61404923923281e-100	5.39486	0.051	0.001	5.05316364629532e-96	LILRA6	Spot	up
MDFIC	0	5.38811	0.227	0.006	8.08915476254717e-305	MDFIC	Spot	up
TOM1L1	3.58456942334918e-51	5.33852	0.026	0.001	5.01194496772682e-47	TOM1L1	Spot	up
ITGA4	0	5.30745	0.482	0.019	8.08915476254717e-305	ITGA4	Spot	up
EMILIN2	0	5.30708	0.367	0.01	8.08915476254717e-305	EMILIN2	Spot	up
FGR	0	5.26577	0.232	0.006	8.08915476254717e-305	FGR	Spot	up
ANXA2	0	5.26062	0.353	0.012	8.08915476254717e-305	ANXA2	Spot	up
PCGF2	4.87690445024273e-78	5.25306	0.04	0.001	6.81888780232939e-74	PCGF2	Spot	up
TMEM71	3.00488159946427e-122	5.24286	0.063	0.002	4.20142545237094e-118	TMEM71	Spot	up
NQO1	1.13375434004708e-61	5.24286	0.032	0.001	1.58521531825383e-57	NQO1	Spot	up
LGALS3	0	5.23663	0.496	0.025	8.08915476254717e-305	LGALS3	Spot	up
NOD2	2.83593595593891e-105	5.23259	0.054	0.001	3.96520565359378e-101	NOD2	Spot	up
VIM	0	5.22653	0.806	0.052	8.08915476254717e-305	VIM	Spot	up
LYZ	0	5.22253	0.545	0.031	8.08915476254717e-305	LYZ	Spot	up
SLC22A1	2.20114976367042e-46	5.21183	0.024	0.001	3.07764759956397e-42	SLC22A1	Spot	up
ZNF366	3.81575277763185e-46	5.21183	0.023	0.001	5.33518553368485e-42	ZNF366	Spot	up
PTPRM	1.47322794373733e-109	5.20204	0.057	0.002	2.05986731093354e-105	PTPRM	Spot	up
GPR157	2.6687343385877e-50	5.15393	0.026	0.001	3.73142435221333e-46	GPR157	Spot	up
CCSER1	4.63460565942955e-50	5.13516	0.026	0.001	6.4801056330144e-46	CCSER1	Spot	up
HOXB7	5.50828575757489e-72	5.13453	0.037	0.001	7.7016851462412e-68	HOXB7	Spot	up
IFI44	0	5.09961	0.572	0.027	8.08915476254717e-305	IFI44	Spot	up
APOL3	3.27964903265593e-101	5.0882	0.053	0.002	4.58560527745952e-97	APOL3	Spot	up
PTPN22	2.23454842830664e-165	5.0863	0.085	0.002	3.12434561245834e-161	PTPN22	Spot	up
AMIGO2	1.26273863849271e-118	5.06009	0.062	0.002	1.7655611643405e-114	AMIGO2	Spot	up
B3GNT8	5.03638059219992e-110	5.01866	0.057	0.002	7.04186734401393e-106	B3GNT8	Spot	up
GPX3	0	5.0162	0.167	0.006	8.08915476254717e-305	GPX3	Spot	up
ZDHHC18	2.2274207736663e-177	5.00848	0.091	0.003	3.11437972574021e-173	ZDHHC18	Spot	up
TGFB2	1.6575909786843e-64	4.9957	0.034	0.001	2.31764370639639e-60	TGFB2	Spot	up
L3MBTL4	0	4.99387	0.226	0.008	8.08915476254717e-305	L3MBTL4	Spot	up
MX2	0	4.98065	0.201	0.007	8.08915476254717e-305	MX2	Spot	up
AMDHD1	2.16563107618865e-50	4.95506	0.026	0.001	3.02798537072698e-46	AMDHD1	Spot	up
PRKACB	1.01871369728495e-256	4.92378	0.131	0.004	1.42436549154381e-252	PRKACB	Spot	up
ODF3B	0	4.91798	0.497	0.027	8.08915476254717e-305	ODF3B	Spot	up
AKR1E2	4.09000006393706e-150	4.9166	0.079	0.003	5.7186380893968e-146	AKR1E2	Spot	up
CFD	0	4.90541	0.262	0.011	8.08915476254717e-305	CFD	Spot	up
ASRGL1	1.13247974533593e-173	4.90032	0.091	0.003	1.5834331799287e-169	ASRGL1	Spot	up
RIC3	3.99860582873145e-36	4.89338	0.019	0.001	5.59085066973231e-32	RIC3	Spot	up
MSR1	0	4.87728	0.638	0.038	8.08915476254717e-305	MSR1	Spot	up
ZFP3	1.61117715745493e-202	4.87338	0.105	0.003	2.25274790155348e-198	ZFP3	Spot	up
CD48	2.35155642003789e-252	4.86057	0.129	0.004	3.28794618649697e-248	CD48	Spot	up
CSRP2	2.10759465020593e-52	4.85225	0.027	0.001	2.94683883991793e-48	CSRP2	Spot	up
KIAA0040	8.88019934139345e-73	4.84166	0.038	0.001	1.24162947191363e-68	KIAA0040	Spot	up
FAM174B	2.11925961087208e-96	4.81998	0.051	0.002	2.96314878792134e-92	FAM174B	Spot	up
SH3D21	0	4.79884	0.163	0.007	8.08915476254717e-305	SH3D21	Spot	up
PAPSS2	4.27823346670841e-99	4.79757	0.053	0.002	5.9818260331517e-95	PAPSS2	Spot	up
ANKRD22	1.31841801647351e-131	4.78813	0.07	0.002	1.84341207063326e-127	ANKRD22	Spot	up
HSPA6	0	4.78022	0.544	0.032	8.08915476254717e-305	HSPA6	Spot	up
TRIM47	9.8163519284529e-218	4.77708	0.114	0.004	1.37252232663628e-213	TRIM47	Spot	up
VNN1	1.01594526630593e-70	4.74716	0.037	0.001	1.42049467134895e-66	VNN1	Spot	up
OAS2	0	4.72558	0.394	0.018	8.08915476254717e-305	OAS2	Spot	up
TRIM14	0	4.72502	0.426	0.022	8.08915476254717e-305	TRIM14	Spot	up
MAP3K6	3.93520724511188e-31	4.67822	0.016	0.001	5.50220677011543e-27	MAP3K6	Spot	up
FLVCR2	6.48482425615698e-87	4.66809	0.047	0.002	9.06708127495869e-83	FLVCR2	Spot	up
APOC1	0	4.66644	0.379	0.033	8.08915476254717e-305	APOC1	Spot	up
ENPP4	5.65396020150483e-93	4.65628	0.05	0.002	7.90536715374405e-89	ENPP4	Spot	up
CDC42EP3	4.27223631074959e-132	4.64763	0.071	0.003	5.97344080969007e-128	CDC42EP3	Spot	up
S100A4	0	4.64399	0.466	0.03	8.08915476254717e-305	S100A4	Spot	up
TMEM140	0	4.64114	0.163	0.007	8.08915476254717e-305	TMEM140	Spot	up
IFIT3	0	4.63596	0.272	0.013	8.08915476254717e-305	IFIT3	Spot	up
TNFAIP8L3	5.37276968579095e-29	4.62687	0.015	0.001	7.51220657467291e-25	TNFAIP8L3	Spot	up
SDC4	1.80768492043483e-67	4.60884	0.035	0.001	2.52750505575198e-63	SDC4	Spot	up
SIGLEC1	0	4.60251	0.589	0.042	8.08915476254717e-305	SIGLEC1	Spot	up
GLB1L	4.81245245760522e-100	4.59973	0.054	0.002	6.72877102622362e-96	GLB1L	Spot	up
PARP15	2.67007493716651e-228	4.59955	0.121	0.005	3.73329877714622e-224	PARP15	Spot	up
DGKG	4.78841599101469e-75	4.59516	0.04	0.002	6.69516323863673e-71	DGKG	Spot	up
GBP4	8.86364431049773e-66	4.55397	0.036	0.002	1.23931474749379e-61	GBP4	Spot	up
TSKU	2.98081529413694e-115	4.54498	0.062	0.002	4.16777594426226e-111	TSKU	Spot	up
USP18	3.27607676424362e-213	4.5333	0.115	0.005	4.58061053176543e-209	USP18	Spot	up
TCEAL9	1.15466494107984e-114	4.52699	0.062	0.003	1.61445252061784e-110	TCEAL9	Spot	up
SULT1A1	1.40252329077036e-58	4.52699	0.032	0.001	1.96100806515511e-54	SULT1A1	Spot	up
SULT1C2	3.11588654729417e-58	4.52181	0.031	0.001	4.35663257042672e-54	SULT1C2	Spot	up
TBC1D2	0	4.5198	0.182	0.009	8.08915476254717e-305	TBC1D2	Spot	up
TYMP	0	4.51625	0.69	0.067	8.08915476254717e-305	TYMP	Spot	up
MOK	8.12691412362663e-46	4.51609	0.024	0.001	1.13630513276548e-41	MOK	Spot	up
ASB9	1.42474360483595e-27	4.50703	0.014	0.001	1.99207650828162e-23	ASB9	Spot	up
CD74	0	4.50611	0.995	0.441	8.08915476254717e-305	CD74	Spot	up
EDNRB	9.29150927311465e-40	4.50324	0.021	0.001	1.29913882656689e-35	EDNRB	Spot	up
MYO1D	2.38120279880877e-256	4.49563	0.137	0.007	3.32939775329443e-252	MYO1D	Spot	up
DOCK1	2.98928284061344e-304	4.4928	0.16	0.007	4.17961526774571e-300	DOCK1	Spot	up
VDR	4.24331629441948e-27	4.48413	0.014	0.001	5.93300484285732e-23	VDR	Spot	up
ADGRE2	0	4.43189	0.32	0.016	8.08915476254717e-305	ADGRE2	Spot	up
RASGEF1B	3.47087789306049e-236	4.42642	0.127	0.006	4.85298147007718e-232	RASGEF1B	Spot	up
FUT7	3.32568236216953e-25	4.41316	0.013	0.001	4.64996907878544e-21	FUT7	Spot	up
PPA1	5.7268825506216e-34	4.39793	0.017	0.001	8.00732718227912e-30	PPA1	Spot	up
IFIT1	0	4.35615	0.172	0.011	8.08915476254717e-305	IFIT1	Spot	up
OLFML2A	4.43215842061642e-67	4.35124	0.037	0.002	6.19704390370588e-63	OLFML2A	Spot	up
CLECL1	2.61466528936922e-284	4.34831	0.153	0.008	3.65582500759604e-280	CLECL1	Spot	up
ACVRL1	2.83422463756108e-88	4.34462	0.049	0.002	3.96281288823791e-84	ACVRL1	Spot	up
NUPR1	0	4.33948	0.787	0.158	8.08915476254717e-305	NUPR1	Spot	up
LSP1	0	4.32952	0.338	0.022	8.08915476254717e-305	LSP1	Spot	up
GRIP2	1.73373046257195e-52	4.31832	0.029	0.001	2.4241019327681e-48	GRIP2	Spot	up
PAPLN	7.21688056515127e-133	4.30625	0.073	0.004	1.00906424061945e-128	PAPLN	Spot	up
ISG15	0	4.29021	0.323	0.024	8.08915476254717e-305	ISG15	Spot	up
MX1	0	4.27731	0.352	0.024	8.08915476254717e-305	MX1	Spot	up
FBP1	1.01827534289109e-232	4.25544	0.127	0.007	1.42375258443032e-228	FBP1	Spot	up
ARHGAP10	2.79403537199242e-256	4.23424	0.14	0.008	3.9066202571198e-252	ARHGAP10	Spot	up
ITGAD	1.15562581281702e-203	4.21923	0.113	0.006	1.61579601148075e-199	ITGAD	Spot	up
FAM241B	9.36809279840032e-42	4.19783	0.022	0.001	1.30984673507233e-37	FAM241B	Spot	up
MBOAT1	2.46097878148553e-170	4.19243	0.095	0.005	3.44094053227307e-166	MBOAT1	Spot	up
PLAU	0	4.18341	0.364	0.027	8.08915476254717e-305	PLAU	Spot	up
CLDN1	2.43106401247099e-225	4.18144	0.126	0.008	3.39911370223693e-221	CLDN1	Spot	up
ACACB	6.05429699332145e-58	4.17572	0.032	0.001	8.46511805606206e-54	ACACB	Spot	up
IRF4	1.13440637784096e-25	4.16632	0.013	0.001	1.58612699749723e-21	IRF4	Spot	up
LRFN4	7.69675730367271e-210	4.13973	0.116	0.007	1.07616060619952e-205	LRFN4	Spot	up
GNG12	3.14302320577863e-50	4.12715	0.028	0.002	4.39457504631968e-46	GNG12	Spot	up
IFITM10	0	4.12568	0.415	0.033	8.08915476254717e-305	IFITM10	Spot	up
CXCL10	1.30915562620904e-296	4.09517	0.162	0.009	1.83046139656548e-292	CXCL10	Spot	up
ADCY3	0	4.08764	0.264	0.019	8.08915476254717e-305	ADCY3	Spot	up
TOP1MT	1.2776968722035e-169	4.08682	0.095	0.005	1.78647576671493e-165	TOP1MT	Spot	up
CLMN	5.09652522274338e-35	4.07014	0.019	0.001	7.12596156643979e-31	CLMN	Spot	up
SCD	0	4.04092	0.181	0.013	8.08915476254717e-305	SCD	Spot	up
OAS3	0	4.03004	0.377	0.032	8.08915476254717e-305	OAS3	Spot	up
DYSF	2.27774689755638e-196	4.02545	0.11	0.007	3.18474571216333e-192	DYSF	Spot	up
SERPING1	3.31516779711446e-200	4.02427	0.109	0.005	4.63526761392543e-196	SERPING1	Spot	up
IFITM3	5.33296079977955e-237	4.02311	0.133	0.009	7.45654579025176e-233	IFITM3	Spot	up
LGALS1	0	4.01117	0.707	0.139	8.08915476254717e-305	LGALS1	Spot	up
GCHFR	0	4.0111	0.194	0.022	8.08915476254717e-305	GCHFR	Spot	up
CNN2	1.01591674785332e-31	4.0102	0.018	0.001	1.42045479684851e-27	CNN2	Spot	up
FXYD6	3.89537456269126e-204	3.99452	0.115	0.007	5.44651271355492e-200	FXYD6	Spot	up
TMEM176A	2.55039342685087e-270	3.99023	0.151	0.01	3.56596008942289e-266	TMEM176A	Spot	up
TGFBI	0	3.98989	0.68	0.076	8.08915476254717e-305	TGFBI	Spot	up
OPTN	3.94805310306305e-140	3.97841	0.08	0.005	5.52016784870276e-136	OPTN	Spot	up
PSMB9	4.50072445611073e-280	3.9547	0.157	0.011	6.29291293453402e-276	PSMB9	Spot	up
BIRC3	7.7693580312248e-21	3.95416	0.011	0.001	1.08631163992585e-16	BIRC3	Spot	up
CAPN11	7.7693580312248e-21	3.95416	0.011	0.001	1.08631163992585e-16	CAPN11	Spot	up
TSPAN4	0	3.9362	0.219	0.016	8.08915476254717e-305	TSPAN4	Spot	up
NPM2	1.29803382633824e-22	3.91066	0.012	0.001	1.81491089598613e-18	NPM2	Spot	up
OCIAD2	2.9229367932811e-51	3.8888	0.03	0.002	4.08685022436564e-47	OCIAD2	Spot	up
TCHH	1.59245027175889e-35	3.88668	0.02	0.001	2.22656396997327e-31	TCHH	Spot	up
ENPP3	1.25681979433477e-24	3.8759	0.014	0.001	1.75728543643887e-20	ENPP3	Spot	up
KIAA1522	7.25811424167774e-121	3.8729	0.071	0.005	1.01482953327138e-116	KIAA1522	Spot	up
IFIT2	0	3.87239	0.216	0.02	8.08915476254717e-305	IFIT2	Spot	up
EPAS1	9.61150618725454e-222	3.86931	0.127	0.009	1.34388079510193e-217	EPAS1	Spot	up
STAP2	1.16558282244414e-19	3.86581	0.011	0.001	1.6297179023414e-15	STAP2	Spot	up
SASH1	2.1057561308647e-195	3.85133	0.112	0.008	2.94426822217503e-191	SASH1	Spot	up
PDLIM4	2.00361774183958e-19	3.85054	0.011	0.001	2.8014583266401e-15	PDLIM4	Spot	up
B3GALNT1	8.32399408358028e-196	3.83845	0.113	0.008	1.16386085276619e-191	B3GALNT1	Spot	up
TCN2	6.39587920499796e-104	3.82993	0.061	0.004	8.94271830442814e-100	TCN2	Spot	up
CXCR4	0	3.82921	0.336	0.03	8.08915476254717e-305	CXCR4	Spot	up
BATF2	1.10913228071296e-30	3.82213	0.018	0.001	1.55078875489286e-26	BATF2	Spot	up
ZNF736	6.87383272799985e-75	3.81897	0.043	0.003	9.61099292028939e-71	ZNF736	Spot	up
CD80	0	3.80941	0.181	0.011	8.08915476254717e-305	CD80	Spot	up
ARHGEF5	3.33583828824652e-21	3.78981	0.012	0.001	4.66416909462628e-17	ARHGEF5	Spot	up
GAPT	1.6118775788279e-115	3.78747	0.068	0.005	2.25372723071718e-111	GAPT	Spot	up
NLRC5	0	3.78653	0.268	0.022	8.08915476254717e-305	NLRC5	Spot	up
PPFIBP1	1.09422036334395e-107	3.7783	0.063	0.004	1.52993891202751e-103	PPFIBP1	Spot	up
TNFSF13B	0	3.77333	0.335	0.03	8.08915476254717e-305	TNFSF13B	Spot	up
ME1	1.71131261731458e-301	3.76912	0.174	0.014	2.39275730152925e-297	ME1	Spot	up
DIRAS1	5.10987471390194e-39	3.76864	0.023	0.002	7.14462682497769e-35	DIRAS1	Spot	up
CD14	0	3.76678	0.808	0.138	8.08915476254717e-305	CD14	Spot	up
PTGER4	1.72272943117925e-294	3.76658	0.165	0.011	2.40872029067483e-290	PTGER4	Spot	up
KCNN4	5.76147419017904e-90	3.76422	0.052	0.003	8.05569321270833e-86	KCNN4	Spot	up
SORCS2	7.5928916115512e-38	3.75436	0.022	0.002	1.06163810512709e-33	SORCS2	Spot	up
AL160269.1	1.62442108378362e-22	3.75356	0.013	0.001	2.27126555934626e-18	AL160269.1	Spot	up
RAB7B	1.7577536307688e-158	3.74877	0.094	0.007	2.45769112654093e-154	RAB7B	Spot	up
CAPN2	5.94327542773436e-204	3.74781	0.119	0.009	8.30988770305819e-200	CAPN2	Spot	up
SLFN5	0	3.74638	0.184	0.015	8.08915476254717e-305	SLFN5	Spot	up
HES1	9.36623405140455e-63	3.74074	0.037	0.003	1.30958684506738e-58	HES1	Spot	up
ENPP1	1.85301005486598e-54	3.73962	0.032	0.002	2.59087865871361e-50	ENPP1	Spot	up
BTN3A3	1.93516231332206e-169	3.73934	0.101	0.008	2.70574394648691e-165	BTN3A3	Spot	up
GCNT1	2.58926442981671e-17	3.7389	0.01	0.001	3.62030952576972e-13	GCNT1	Spot	up
SLAMF7	9.64727944565848e-120	3.73177	0.067	0.004	1.34888261209197e-115	SLAMF7	Spot	up
ARHGEF16	6.15952291871379e-48	3.72389	0.028	0.002	8.61224494494562e-44	ARHGEF16	Spot	up
SLC45A3	7.01866003400709e-18	3.72222	0.01	0.001	9.81349045954872e-14	SLC45A3	Spot	up
DACT1	8.50802740661549e-20	3.71802	0.011	0.001	1.18959239199298e-15	DACT1	Spot	up
EPHB6	2.93859927234676e-48	3.71662	0.029	0.002	4.10874950259524e-44	EPHB6	Spot	up
SYNE3	4.92550301050696e-164	3.71244	0.097	0.007	6.88683830929083e-160	SYNE3	Spot	up
ERAP2	1.24836412187662e-70	3.70476	0.04	0.002	1.74546271520789e-66	ERAP2	Spot	up
IL15	1.12690640295819e-60	3.70208	0.035	0.002	1.57564053261614e-56	IL15	Spot	up
FAM218A	2.57124461800009e-26	3.69916	0.015	0.001	3.59511422488773e-22	FAM218A	Spot	up
BST1	1.07222330390953e-54	3.69327	0.033	0.002	1.49918262352631e-50	BST1	Spot	up
CD44	0	3.69028	0.36	0.019	8.08915476254717e-305	CD44	Spot	up
RTP4	5.15819367674305e-93	3.67704	0.056	0.004	7.21218639882214e-89	RTP4	Spot	up
HAGHL	0	3.66931	0.304	0.03	8.08915476254717e-305	HAGHL	Spot	up
BTN2A2	5.74763188577071e-219	3.65908	0.13	0.011	8.03633890268461e-215	BTN2A2	Spot	up
P2RY8	6.34491729357797e-43	3.65628	0.025	0.002	8.87146335988071e-39	P2RY8	Spot	up
SLC38A6	0	3.6546	0.334	0.032	8.08915476254717e-305	SLC38A6	Spot	up
IL4I1	0	3.64368	0.276	0.029	8.08915476254717e-305	IL4I1	Spot	up
APOE	0	3.64159	0.993	0.808	8.08915476254717e-305	APOE	Spot	up
LILRA5	6.07623531844987e-45	3.62985	0.026	0.002	8.49579222225661e-41	LILRA5	Spot	up
ZNF844	3.26183226118187e-24	3.59807	0.014	0.001	4.56069386758449e-20	ZNF844	Spot	up
CCRL2	1.71855566267417e-96	3.59516	0.059	0.005	2.40288452755102e-92	CCRL2	Spot	up
CTSD	0	3.5889	0.547	0.106	8.08915476254717e-305	CTSD	Spot	up
PLEKHH1	8.14224687358433e-110	3.58683	0.068	0.006	1.13844895786456e-105	PLEKHH1	Spot	up
TMEM176B	0	3.58471	0.307	0.03	8.08915476254717e-305	TMEM176B	Spot	up
IFI30	0	3.56985	0.627	0.106	8.08915476254717e-305	IFI30	Spot	up
PLBD1	4.41223694589709e-237	3.56918	0.142	0.012	6.16918969775332e-233	PLBD1	Spot	up
BBC3	9.64946482577873e-230	3.55287	0.137	0.011	1.34918817194038e-225	BBC3	Spot	up
PLAUR	0	3.54148	0.458	0.07	8.08915476254717e-305	PLAUR	Spot	up
ALDH5A1	6.28388262622639e-27	3.53215	0.016	0.001	8.78612468798973e-23	ALDH5A1	Spot	up
BHLHE40	9.42658343158933e-265	3.50987	0.16	0.015	1.31802489540482e-260	BHLHE40	Spot	up
PGM5	1.83449404706757e-104	3.50541	0.065	0.006	2.56498957660987e-100	PGM5	Spot	up
LITAF	0	3.49851	0.537	0.073	8.08915476254717e-305	LITAF	Spot	up
PIR	5.39351133729156e-87	3.49264	0.054	0.005	7.54120755180105e-83	PIR	Spot	up
TNFAIP2	0	3.4858	0.73	0.104	8.08915476254717e-305	TNFAIP2	Spot	up
ITGB8	2.48747244187074e-28	3.48578	0.016	0.001	3.47798396822366e-24	ITGB8	Spot	up
DENND2D	0	3.47015	0.232	0.023	8.08915476254717e-305	DENND2D	Spot	up
LDLRAD3	7.42240172288721e-68	3.45157	0.042	0.004	1.03780020889409e-63	LDLRAD3	Spot	up
BLVRA	1.35743160761744e-235	3.44645	0.145	0.014	1.8979608737707e-231	BLVRA	Spot	up
CRYBG1	1.56375569548275e-160	3.43975	0.099	0.009	2.18644321342398e-156	CRYBG1	Spot	up
ZNF804A	3.21613990781838e-40	3.43829	0.025	0.002	4.49680681911165e-36	ZNF804A	Spot	up
GCLM	1.19066332568421e-21	3.43829	0.013	0.001	1.66478546197167e-17	GCLM	Spot	up
ISG20	1.53860405082395e-208	3.43567	0.124	0.01	2.15127618386204e-204	ISG20	Spot	up
CLIC2	2.15667761717966e-55	3.43451	0.035	0.003	3.0154666443406e-51	CLIC2	Spot	up
CDCP1	1.02368079491542e-184	3.42119	0.115	0.011	1.43131048745074e-180	CDCP1	Spot	up
VMO1	2.16907037868817e-259	3.41503	0.159	0.015	3.03279420348181e-255	VMO1	Spot	up
KLF10	6.84908211250406e-146	3.41302	0.091	0.008	9.57638660970317e-142	KLF10	Spot	up
RSAD2	1.48524649338954e-180	3.40482	0.114	0.011	2.07667164705725e-176	RSAD2	Spot	up
ZNF439	3.66731786407988e-71	3.40343	0.045	0.004	5.12764383755649e-67	ZNF439	Spot	up
NME8	9.25022220926172e-71	3.38695	0.045	0.004	1.29336606929897e-66	NME8	Spot	up
RGS1	0	3.37633	0.486	0.072	8.08915476254717e-305	RGS1	Spot	up
JAML	6.92388413915187e-79	3.37009	0.049	0.004	9.68097480336214e-75	JAML	Spot	up
APOL1	4.27786882352419e-116	3.35773	0.074	0.007	5.98131618905152e-112	APOL1	Spot	up
GSDME	0	3.35374	0.276	0.033	8.08915476254717e-305	GSDME	Spot	up
CHPF	1.09941606726712e-32	3.35124	0.02	0.002	1.53720354525289e-28	CHPF	Spot	up
FCHO2	0	3.34413	0.304	0.036	8.08915476254717e-305	FCHO2	Spot	up
SAMD9L	0	3.33343	0.301	0.04	8.08915476254717e-305	SAMD9L	Spot	up
BIRC7	2.25018962180179e-269	3.33277	0.177	0.022	3.14621512920326e-265	BIRC7	Spot	up
SYNE2	2.56885758289588e-49	3.32248	0.032	0.003	3.59177667240502e-45	SYNE2	Spot	up
METRNL	0	3.31939	0.361	0.044	8.08915476254717e-305	METRNL	Spot	up
CIITA	0	3.31053	0.759	0.149	8.08915476254717e-305	CIITA	Spot	up
TAP1	3.82769458301038e-280	3.30982	0.171	0.017	5.35188256596511e-276	TAP1	Spot	up
PRXL2B	1.02639679172639e-162	3.30612	0.104	0.011	1.43510799419184e-158	PRXL2B	Spot	up
MS4A4E	1.74589055430122e-294	3.29806	0.183	0.02	2.44110417302397e-290	MS4A4E	Spot	up
PDE6G	7.54246486323137e-26	3.29445	0.016	0.001	1.05458743717701e-21	PDE6G	Spot	up
ATF3	2.0334072858023e-62	3.29175	0.041	0.004	2.84311006700878e-58	ATF3	Spot	up
HPN	2.53679168289205e-45	3.29031	0.029	0.003	3.54694213101966e-41	HPN	Spot	up
HELZ2	6.68270549713326e-122	3.28979	0.074	0.006	9.34375882609173e-118	HELZ2	Spot	up
KCNH4	1.59670801634939e-21	3.28551	0.013	0.001	2.23251714845972e-17	KCNH4	Spot	up
RAB42	1.00219758700739e-256	3.28073	0.167	0.02	1.40127266615373e-252	RAB42	Spot	up
GPR155	6.52555714202988e-109	3.28009	0.07	0.007	9.12403399598618e-105	GPR155	Spot	up
WIPF3	8.0587446776041e-65	3.27323	0.041	0.004	1.12677368082261e-60	WIPF3	Spot	up
ZNF311	1.58198241143919e-27	3.26377	0.017	0.002	2.21192780767428e-23	ZNF311	Spot	up
HGF	1.03177162041257e-191	3.26333	0.123	0.013	1.44262307966086e-187	HGF	Spot	up
FGL2	0	3.26068	0.504	0.074	8.08915476254717e-305	FGL2	Spot	up
CMPK2	0	3.26019	0.452	0.075	8.08915476254717e-305	CMPK2	Spot	up
AC099489.1	2.88190928072941e-66	3.25824	0.043	0.004	4.02948555631586e-62	AC099489.1	Spot	up
IQGAP2	0	3.25242	0.248	0.028	8.08915476254717e-305	IQGAP2	Spot	up
STAT1	0	3.24788	0.355	0.054	8.08915476254717e-305	STAT1	Spot	up
MELTF	5.34629675515133e-165	3.24319	0.109	0.012	7.47519212305259e-161	MELTF	Spot	up
MGLL	2.13828915459517e-228	3.23716	0.149	0.017	2.98975589595496e-224	MGLL	Spot	up
MCTP1	0	3.23357	0.277	0.034	8.08915476254717e-305	MCTP1	Spot	up
RALGDS	0	3.23049	0.208	0.024	8.08915476254717e-305	RALGDS	Spot	up
LILRA2	1.51488629792892e-306	3.22933	0.192	0.021	2.11811402176421e-302	LILRA2	Spot	up
HSF4	5.55164730667016e-245	3.22816	0.156	0.017	7.76231326418622e-241	HSF4	Spot	up
DAGLA	4.43049009059424e-119	3.2141	0.079	0.009	6.19471124466887e-115	DAGLA	Spot	up
CUBN	2.39868718329561e-21	3.21022	0.013	0.001	3.35384441968392e-17	CUBN	Spot	up
CAPG	0	3.20637	0.727	0.203	8.08915476254717e-305	CAPG	Spot	up
PCBD1	8.56108106271584e-115	3.20314	0.077	0.009	1.19701035418893e-110	PCBD1	Spot	up
ST14	5.25137346440445e-239	3.20116	0.154	0.017	7.34247037793031e-235	ST14	Spot	up
DAPK1	0	3.20013	0.377	0.053	8.08915476254717e-305	DAPK1	Spot	up
LILRA1	2.05651114827361e-156	3.19875	0.101	0.011	2.87541388751617e-152	LILRA1	Spot	up
FLNA	2.75476191641887e-48	3.19575	0.032	0.003	3.85170811153686e-44	FLNA	Spot	up
BCL2A1	4.44147428031483e-204	3.19412	0.122	0.01	6.21006933873619e-200	BCL2A1	Spot	up
CD38	4.00957359970977e-93	3.19351	0.057	0.005	5.6061858071142e-89	CD38	Spot	up
CBLN3	1.40759257652916e-28	3.1863	0.018	0.002	1.96809594050308e-24	CBLN3	Spot	up
ARRDC4	1.36057426014037e-56	3.17798	0.038	0.004	1.90235493052826e-52	ARRDC4	Spot	up
SLC22A18AS	5.01254022912067e-72	3.17105	0.048	0.005	7.00853374835652e-68	SLC22A18AS	Spot	up
CIDEB	5.39163168822885e-262	3.16367	0.168	0.019	7.53857942648158e-258	CIDEB	Spot	up
INPP1	2.10037348267108e-42	3.1622	0.028	0.003	2.9367422034707e-38	INPP1	Spot	up
DRAM1	1.67053928983295e-212	3.15922	0.136	0.014	2.33574803504443e-208	DRAM1	Spot	up
CHI3L1	4.71286933552032e-104	3.15563	0.069	0.007	6.58953390492451e-100	CHI3L1	Spot	up
MCUB	2.1105343359159e-73	3.15255	0.049	0.005	2.95094910847762e-69	MCUB	Spot	up
C1orf127	6.2664945678067e-92	3.14972	0.06	0.006	8.76181270470732e-88	C1orf127	Spot	up
TMEM255A	3.1432227729055e-37	3.14595	0.023	0.002	4.39485408107647e-33	TMEM255A	Spot	up
KLHDC8B	0	3.14391	0.278	0.039	8.08915476254717e-305	KLHDC8B	Spot	up
SDSL	1.26807116183565e-212	3.13415	0.14	0.016	1.7730170984786e-208	SDSL	Spot	up
AGPAT4	2.41314682513421e-162	3.13402	0.107	0.012	3.37406189090265e-158	AGPAT4	Spot	up
DBI	1.19524303719378e-231	3.13306	0.155	0.02	1.67118881460435e-227	DBI	Spot	up
TNNI2	8.57077309490895e-126	3.13306	0.085	0.01	1.19836549413017e-121	TNNI2	Spot	up
CCDC170	5.79857055475534e-151	3.12726	0.099	0.011	8.10756134965891e-147	CCDC170	Spot	up
PRSS36	1.07997240756891e-233	3.12033	0.153	0.018	1.51001742026285e-229	PRSS36	Spot	up
MICAL2	2.18755960947486e-265	3.11993	0.173	0.021	3.05864584596776e-261	MICAL2	Spot	up
B2M	0	3.11561	0.653	0.148	8.08915476254717e-305	B2M	Spot	up
EFCAB6	3.39565604339785e-21	3.11528	0.014	0.002	4.74780627987888e-17	EFCAB6	Spot	up
RRAGD	4.16047613379189e-175	3.11396	0.116	0.013	5.81717773026782e-171	RRAGD	Spot	up
PLIN2	5.03741321036259e-61	3.10714	0.041	0.005	7.04331115072898e-57	PLIN2	Spot	up
PKD1L3	9.41768488447772e-17	3.10331	0.011	0.001	1.31678070054768e-12	PKD1L3	Spot	up
CBR1	6.99668034935144e-67	3.09984	0.046	0.006	9.78275846446318e-63	CBR1	Spot	up
PLA2G4C	4.48290133240364e-76	3.09395	0.051	0.006	6.26799264296677e-72	PLA2G4C	Spot	up
ANKRD33B	4.89183615715183e-25	3.09325	0.016	0.002	6.83976531492968e-21	ANKRD33B	Spot	up
RASGRP3	0	3.08052	0.245	0.033	8.08915476254717e-305	RASGRP3	Spot	up
SPARCL1	1.74919275616707e-17	3.07293	0.011	0.001	2.4457213116728e-13	SPARCL1	Spot	up
TRPC1	3.29631926488978e-17	3.07293	0.011	0.001	4.60891359616889e-13	TRPC1	Spot	up
CPAMD8	9.42733708285624e-17	3.07293	0.011	0.001	1.31813027092496e-12	CPAMD8	Spot	up
IGF2R	0	3.0682	0.235	0.032	8.08915476254717e-305	IGF2R	Spot	up
PFKP	1.38916659021753e-40	3.06797	0.027	0.003	1.94233272644215e-36	PFKP	Spot	up
ZNF438	3.1112746526405e-230	3.06698	0.153	0.019	4.35018421932195e-226	ZNF438	Spot	up
CD209	0	3.06582	0.201	0.023	8.08915476254717e-305	CD209	Spot	up
S100A9	4.89567106362782e-213	3.05129	0.134	0.013	6.84512728116442e-209	S100A9	Spot	up
PHLDB1	6.15201007986955e-137	3.05084	0.094	0.011	8.60174049367361e-133	PHLDB1	Spot	up
EPSTI1	0	3.04826	0.506	0.097	8.08915476254717e-305	EPSTI1	Spot	up
TFAP2E	1.4661291479302e-37	3.04817	0.026	0.003	2.04994177463601e-33	TFAP2E	Spot	up
SAMD4A	0	3.04782	0.339	0.053	8.08915476254717e-305	SAMD4A	Spot	up
HESX1	1.40932223426951e-80	3.04191	0.055	0.007	1.97051434795562e-76	HESX1	Spot	up
GIMAP7	3.42368771925921e-189	3.03449	0.13	0.017	4.78700016906823e-185	GIMAP7	Spot	up
TSPO	0	3.02968	0.328	0.051	8.08915476254717e-305	TSPO	Spot	up
NT5C3B	1.61214740839987e-149	3.01177	0.102	0.012	2.2541045064247e-145	NT5C3B	Spot	up
CDCA7L	3.36185292127181e-153	3.01094	0.105	0.013	4.70054275452225e-149	CDCA7L	Spot	up
CHCHD2	2.02697805580767e-197	3.0055	0.134	0.017	2.83412071763028e-193	CHCHD2	Spot	up
LIPA	0	2.99621	0.396	0.074	8.08915476254717e-305	LIPA	Spot	up
CACNA2D4	2.09848637133131e-263	2.9951	0.18	0.025	2.93410364439544e-259	CACNA2D4	Spot	up
GBP1	3.135683786187e-128	2.99377	0.079	0.007	4.38431306984666e-124	GBP1	Spot	up
LILRA4	2.45329380915941e-126	2.98981	0.088	0.011	3.43019540396669e-122	LILRA4	Spot	up
HSD3B7	3.45360084865457e-103	2.98072	0.072	0.009	4.82882470658882e-99	HSD3B7	Spot	up
FXYD5	0	2.98026	0.523	0.105	8.08915476254717e-305	FXYD5	Spot	up
NPIPB15	6.31030026972461e-48	2.97778	0.032	0.004	8.82306183712894e-44	NPIPB15	Spot	up
KIAA1614	1.7933153837036e-83	2.96758	0.058	0.007	2.50741356949437e-79	KIAA1614	Spot	up
NHLRC1	2.50133689744072e-23	2.9639	0.016	0.002	3.49736925000161e-19	NHLRC1	Spot	up
SLC7A1	1.31747056732128e-90	2.96001	0.063	0.008	1.84208734722862e-86	SLC7A1	Spot	up
CCDC9B	0	2.95979	0.275	0.043	8.08915476254717e-305	CCDC9B	Spot	up
ZNF677	9.05001783770968e-27	2.95892	0.017	0.002	1.26537349406857e-22	ZNF677	Spot	up
HSBP1L1	1.48123098412464e-69	2.94577	0.047	0.006	2.07105716200308e-65	HSBP1L1	Spot	up
GADD45G	3.27108942392157e-80	2.9437	0.057	0.008	4.57363723252714e-76	GADD45G	Spot	up
PAM	1.74028092110073e-16	2.94203	0.011	0.001	2.43326078388304e-12	PAM	Spot	up
RGS16	1.64466237922887e-62	2.93834	0.043	0.005	2.2995669386378e-58	RGS16	Spot	up
FAM50B	4.10103679660068e-115	2.93669	0.081	0.011	5.73406964900707e-111	FAM50B	Spot	up
OASL	3.6207982226005e-100	2.93443	0.065	0.007	5.06260007484002e-96	OASL	Spot	up
TLR2	0	2.92734	0.558	0.098	8.08915476254717e-305	TLR2	Spot	up
ACKR3	8.02721318528587e-79	2.9249	0.056	0.007	1.12236494756667e-74	ACKR3	Spot	up
TGIF1	1.5467510186578e-209	2.92109	0.146	0.02	2.16266727428733e-205	TGIF1	Spot	up
ZNF880	1.82252162840081e-26	2.92	0.018	0.002	2.54824974083001e-22	ZNF880	Spot	up
RAB24	1.46356373557183e-97	2.91752	0.07	0.009	2.04635481507653e-93	RAB24	Spot	up
EPHX1	0	2.91649	0.252	0.039	8.08915476254717e-305	EPHX1	Spot	up
GPR65	4.14087737743954e-256	2.91576	0.177	0.025	5.78977474913596e-252	GPR65	Spot	up
MYO1A	1.30732781558388e-75	2.91374	0.054	0.007	1.82790575174938e-71	MYO1A	Spot	up
IQGAP1	8.92122842104387e-290	2.91066	0.197	0.027	1.24736615783035e-285	IQGAP1	Spot	up
FBXO6	3.05739945879337e-33	2.91066	0.024	0.003	4.27485592328488e-29	FBXO6	Spot	up
ZNF682	8.04598731580404e-20	2.91066	0.013	0.002	1.12498994649572e-15	ZNF682	Spot	up
CD83	0	2.91013	0.246	0.032	8.08915476254717e-305	CD83	Spot	up
CSGALNACT2	2.7965252537296e-279	2.90916	0.194	0.028	3.91010160976473e-275	CSGALNACT2	Spot	up
CASP7	8.12676211469916e-94	2.90826	0.067	0.009	1.13628387887724e-89	CASP7	Spot	up
CCR9	1.53862785083105e-73	2.89849	0.052	0.007	2.15130946103198e-69	CCR9	Spot	up
ZNF563	3.35780998997998e-50	2.89745	0.036	0.005	4.69488992799001e-46	ZNF563	Spot	up
UBE2L6	0	2.89611	0.293	0.047	8.08915476254717e-305	UBE2L6	Spot	up
ZNF154	4.95931032563869e-16	2.89587	0.01	0.001	6.93410769730801e-12	ZNF154	Spot	up
SELENOM	2.5661638744608e-145	2.8899	0.104	0.014	3.58801032927109e-141	SELENOM	Spot	up
CYP2S1	2.70160532947012e-63	2.88918	0.045	0.006	3.77738457166513e-59	CYP2S1	Spot	up
SLC17A9	2.38931425005261e-297	2.88916	0.208	0.031	3.34073918442356e-293	SLC17A9	Spot	up
C1orf54	4.47091167269968e-164	2.87612	0.117	0.016	6.25122870076869e-160	C1orf54	Spot	up
CHRFAM7A	3.25339360834704e-20	2.8759	0.014	0.002	4.54889494319083e-16	CHRFAM7A	Spot	up
TUBB6	3.97698890265675e-70	2.87536	0.049	0.006	5.56062588369467e-66	TUBB6	Spot	up
SLC31A2	7.64940757024974e-101	2.8719	0.074	0.01	1.06954016647232e-96	SLC31A2	Spot	up
SELENOP	0	2.86981	0.321	0.055	8.08915476254717e-305	SELENOP	Spot	up
RCAN3	1.04512998340622e-117	2.86809	0.085	0.012	1.46130074279858e-113	RCAN3	Spot	up
PARP12	0	2.86158	0.344	0.058	8.08915476254717e-305	PARP12	Spot	up
SLC2A3	3.92115374882892e-40	2.86101	0.029	0.004	5.4825571716126e-36	SLC2A3	Spot	up
AVPI1	3.12922333246672e-66	2.85902	0.049	0.007	4.37528006345496e-62	AVPI1	Spot	up
FKBP9	5.43899500356441e-52	2.8582	0.037	0.005	7.60480281398376e-48	FKBP9	Spot	up
CLIC4	3.46876633284729e-85	2.85622	0.061	0.008	4.85002908658708e-81	CLIC4	Spot	up
EYA2	9.46854674086719e-247	2.85054	0.171	0.024	1.32389220530805e-242	EYA2	Spot	up
PLXNC1	0	2.84702	0.308	0.05	8.08915476254717e-305	PLXNC1	Spot	up
P4HA2	1.08163134214522e-31	2.84524	0.022	0.003	1.51233694258745e-27	P4HA2	Spot	up
PARVB	8.87416348887137e-192	2.83951	0.136	0.019	1.24078553901399e-187	PARVB	Spot	up
FCGR2A	0	2.8375	0.634	0.147	8.08915476254717e-305	FCGR2A	Spot	up
CPM	0	2.8373	0.269	0.047	8.08915476254717e-305	CPM	Spot	up
MCOLN2	1.8727269448461e-117	2.83527	0.072	0.006	2.61844681428381e-113	MCOLN2	Spot	up
DPEP2	9.71928361204574e-297	2.81165	0.216	0.036	1.35895023463624e-292	DPEP2	Spot	up
SLC25A43	2.38170945987182e-77	2.80806	0.056	0.008	3.33010616679279e-73	SLC25A43	Spot	up
GAS2L3	2.52045929803537e-119	2.8065	0.087	0.012	3.52410619051306e-115	GAS2L3	Spot	up
SYNE1	1.14968375036659e-41	2.80645	0.03	0.004	1.60748781976257e-37	SYNE1	Spot	up
LPIN3	1.41708621612171e-95	2.8026	0.07	0.01	1.98136994738138e-91	LPIN3	Spot	up
FTL	0	2.80206	0.775	0.485	8.08915476254717e-305	FTL	Spot	up
SHISA5	9.8663529602739e-122	2.79491	0.09	0.013	1.3795134709055e-117	SHISA5	Spot	up
ZNF483	1.55557525284655e-40	2.79015	0.03	0.004	2.17500531853005e-36	ZNF483	Spot	up
PATL2	1.4567574918586e-89	2.78951	0.066	0.009	2.0368383251167e-85	PATL2	Spot	up
NPHP1	3.58843666606473e-30	2.78781	0.021	0.003	5.01735214649171e-26	NPHP1	Spot	up
HK3	0	2.78437	0.315	0.053	8.08915476254717e-305	HK3	Spot	up
WARS	0	2.78405	0.319	0.056	8.08915476254717e-305	WARS	Spot	up
OSGIN1	1.81252786977598e-58	2.78291	0.043	0.006	2.53427646752078e-54	OSGIN1	Spot	up
SLC43A3	1.22898670377976e-272	2.78213	0.194	0.029	1.71836920922486e-268	SLC43A3	Spot	up
SIGLEC7	3.59182934475738e-249	2.77438	0.18	0.028	5.02209578983977e-245	SIGLEC7	Spot	up
NEU3	2.03614309213665e-116	2.77396	0.087	0.013	2.84693527142546e-112	NEU3	Spot	up
FCMR	1.60153200453096e-34	2.77259	0.026	0.004	2.23926204873519e-30	FCMR	Spot	up
ESRRB	1.39079817861504e-24	2.77233	0.017	0.002	1.94461401333954e-20	ESRRB	Spot	up
SYTL3	2.19912880575403e-113	2.77128	0.083	0.012	3.07482189620529e-109	SYTL3	Spot	up
BCL6	2.24792493703024e-88	2.76957	0.065	0.009	3.14304864695568e-84	BCL6	Spot	up
ZBTB42	1.63308140539496e-75	2.76627	0.055	0.008	2.28337442102324e-71	ZBTB42	Spot	up
LILRB2	0	2.76437	0.224	0.029	8.08915476254717e-305	LILRB2	Spot	up
SLC2A9	9.1269294917368e-294	2.76378	0.212	0.034	1.27612728153464e-289	SLC2A9	Spot	up
NIBAN1	4.69124305053541e-72	2.76113	0.052	0.007	6.55929603325862e-68	NIBAN1	Spot	up
PMP22	4.3055826872358e-233	2.75454	0.173	0.028	6.02006571329309e-229	PMP22	Spot	up
NEK8	3.4793376581622e-35	2.75454	0.026	0.004	4.86480991364239e-31	NEK8	Spot	up
ANKRD6	1.05878343818411e-70	2.74953	0.052	0.007	1.48039100326902e-66	ANKRD6	Spot	up
SEMA4A	9.19247127731057e-43	2.74716	0.031	0.004	1.28529133399356e-38	SEMA4A	Spot	up
DOC2A	3.82098349863351e-182	2.74603	0.136	0.021	5.34249912778938e-178	DOC2A	Spot	up
AGRN	1.49963616945626e-224	2.74401	0.167	0.027	2.09679129213374e-220	AGRN	Spot	up
XAF1	0	2.74333	0.537	0.141	8.08915476254717e-305	XAF1	Spot	up
EML6	5.56203369359235e-20	2.73802	0.014	0.002	7.77683551038083e-16	EML6	Spot	up
BTN3A2	4.3009698531449e-157	2.73291	0.117	0.018	6.0136160486672e-153	BTN3A2	Spot	up
PARP9	1.30642471553971e-226	2.73067	0.172	0.029	1.82664303726762e-222	PARP9	Spot	up
VMP1	0	2.7278	0.368	0.074	8.08915476254717e-305	VMP1	Spot	up
GSTT2B	9.89647124387695e-18	2.7278	0.013	0.002	1.38372460931887e-13	GSTT2B	Spot	up
AP1S2	5.56981137582225e-146	2.72346	0.108	0.016	7.78771026567468e-142	AP1S2	Spot	up
MFSD2A	2.97903131190997e-77	2.72304	0.056	0.008	4.16528158031252e-73	MFSD2A	Spot	up
SPINT1	3.34968046501022e-219	2.72255	0.172	0.031	4.68352322617729e-215	SPINT1	Spot	up
CHIT1	1.83809235698146e-124	2.71771	0.096	0.015	2.57002073353148e-120	CHIT1	Spot	up
VSIG10	5.13115644473467e-63	2.71212	0.048	0.007	7.17438294102802e-59	VSIG10	Spot	up
SRXN1	1.93426696476581e-115	2.70521	0.085	0.012	2.70449207013556e-111	SRXN1	Spot	up
XYLT1	1.55441676001981e-139	2.70502	0.104	0.016	2.1733855138597e-135	XYLT1	Spot	up
TNFRSF14	0	2.70102	0.596	0.168	8.08915476254717e-305	TNFRSF14	Spot	up
CD151	3.5549217664406e-162	2.70094	0.122	0.019	4.97049161383725e-158	CD151	Spot	up
AHR	2.18164155036921e-223	2.69908	0.166	0.027	3.05037121572623e-219	AHR	Spot	up
GGACT	2.76448786722634e-34	2.69458	0.026	0.004	3.86530693595587e-30	GGACT	Spot	up
VSIG10L	3.52218187863714e-59	2.6918	0.046	0.007	4.92471470271045e-55	VSIG10L	Spot	up
IFIH1	0	2.68458	0.242	0.04	8.08915476254717e-305	IFIH1	Spot	up
TRPV4	0	2.68127	0.272	0.047	8.08915476254717e-305	TRPV4	Spot	up
PHLDA1	1.54921637535865e-26	2.66402	0.02	0.003	2.16611433602647e-22	PHLDA1	Spot	up
TUBA1C	3.37137595417463e-56	2.66173	0.043	0.007	4.71385785912697e-52	TUBA1C	Spot	up
IRF7	0	2.65818	0.369	0.084	8.08915476254717e-305	IRF7	Spot	up
GBP2	5.66467297471413e-41	2.65585	0.029	0.004	7.9203457532453e-37	GBP2	Spot	up
CDKN2B	7.90803729643426e-73	2.65271	0.057	0.009	1.10570177478744e-68	CDKN2B	Spot	up
DHDH	3.75510018039085e-57	2.65247	0.045	0.007	5.25038107222248e-53	DHDH	Spot	up
HACD4	4.43298926967972e-111	2.64824	0.086	0.014	6.19820559686619e-107	HACD4	Spot	up
CSTB	4.46598609842575e-241	2.637	0.191	0.036	6.24434176281888e-237	CSTB	Spot	up
NT5DC3	4.63776807479439e-17	2.63674	0.012	0.002	6.48452732217751e-13	NT5DC3	Spot	up
LRRC6	1.00044243756504e-38	2.63382	0.03	0.005	1.39881861620344e-34	LRRC6	Spot	up
GYPC	2.66686230848268e-227	2.63169	0.171	0.028	3.72880687972049e-223	GYPC	Spot	up
LILRB1	0	2.62914	0.344	0.063	8.08915476254717e-305	LILRB1	Spot	up
EFCAB13	9.8733755581794e-197	2.62356	0.15	0.025	1.38049537054464e-192	EFCAB13	Spot	up
DOP1B	1.39158173622536e-186	2.62183	0.143	0.024	1.94570958359029e-182	DOP1B	Spot	up
VAMP5	8.28341469794907e-58	2.6189	0.045	0.007	1.15818704306724e-53	VAMP5	Spot	up
STK32B	3.15158052861067e-100	2.61875	0.078	0.013	4.40653989510344e-96	STK32B	Spot	up
CNTNAP1	5.49508700875191e-25	2.61788	0.019	0.003	7.68323065563692e-21	CNTNAP1	Spot	up
FTH1	0	2.61388	0.892	0.546	8.08915476254717e-305	FTH1	Spot	up
VAT1	0	2.61135	0.284	0.058	8.08915476254717e-305	VAT1	Spot	up
SH3PXD2B	1.12193763842776e-103	2.61123	0.079	0.012	1.56869320604969e-99	SH3PXD2B	Spot	up
CARD16	1.52396279248974e-24	2.60288	0.018	0.003	2.13080477645915e-20	CARD16	Spot	up
CPPED1	5.36000099985158e-205	2.59044	0.16	0.028	7.49435339799249e-201	CPPED1	Spot	up
NIBAN2	1.39547674448471e-56	2.58949	0.043	0.006	1.95115558413852e-52	NIBAN2	Spot	up
SLC22A15	3.46255323553514e-205	2.58838	0.163	0.03	4.84134193392524e-201	SLC22A15	Spot	up
KLHL3	3.23232097273885e-27	2.57809	0.021	0.004	4.51943118408346e-23	KLHL3	Spot	up
PADI2	5.057362781761e-220	2.57469	0.172	0.031	7.07120464145823e-216	PADI2	Spot	up
STX11	3.16279617688286e-174	2.57461	0.129	0.02	4.42222161451761e-170	STX11	Spot	up
NADK	0	2.57294	0.332	0.068	8.08915476254717e-305	NADK	Spot	up
SDCBP	6.8383612845071e-224	2.5726	0.175	0.031	9.56139674799783e-220	SDCBP	Spot	up
HERC5	8.63511996233636e-200	2.57241	0.157	0.028	1.20736247313387e-195	HERC5	Spot	up
GPR141	2.86625210731169e-132	2.57234	0.106	0.018	4.00759369644321e-128	GPR141	Spot	up
IFI35	0	2.57064	0.253	0.049	8.08915476254717e-305	IFI35	Spot	up
BCL3	1.83748718541728e-123	2.57014	0.094	0.015	2.56917458265044e-119	BCL3	Spot	up
S100A8	3.98699327542466e-26	2.56579	0.021	0.004	5.57461399769876e-22	S100A8	Spot	up
CD6	2.05883263278124e-112	2.56454	0.089	0.015	2.87865978715473e-108	CD6	Spot	up
NR1H3	0	2.56347	0.317	0.07	8.08915476254717e-305	NR1H3	Spot	up
PLP2	3.15858151619375e-35	2.56274	0.028	0.005	4.41632867594211e-31	PLP2	Spot	up
NAGS	2.10528840362858e-16	2.56274	0.012	0.002	2.94361424595348e-12	NAGS	Spot	up
UNC13B	1.83344930529186e-59	2.56104	0.048	0.008	2.56352881865908e-55	UNC13B	Spot	up
CD69	1.32008005749675e-35	2.55982	0.028	0.004	1.84573593639195e-31	CD69	Spot	up
DIPK1A	1.9248809081586e-23	2.55821	0.017	0.003	2.69136848578736e-19	DIPK1A	Spot	up
DOK2	1.0367317135029e-118	2.55441	0.093	0.015	1.44955828181975e-114	DOK2	Spot	up
TMEM37	1.93749458984429e-110	2.55109	0.088	0.015	2.70900493552029e-106	TMEM37	Spot	up
HIVEP2	1.21242865873553e-14	2.54809	0.011	0.002	1.69521775064402e-10	HIVEP2	Spot	up
CD63	0	2.54291	0.518	0.143	8.08915476254717e-305	CD63	Spot	up
DDTL	4.10657345821213e-46	2.53627	0.037	0.006	5.7418110092722e-42	DDTL	Spot	up
ST18	3.13323325515656e-43	2.53251	0.035	0.006	4.3808867373599e-39	ST18	Spot	up
DCBLD1	1.53381758752334e-61	2.5324	0.05	0.009	2.14458375087513e-57	DCBLD1	Spot	up
GALNT6	7.36104623855443e-127	2.53088	0.104	0.019	1.02922148507468e-122	GALNT6	Spot	up
CD163	0	2.52886	0.607	0.129	8.08915476254717e-305	CD163	Spot	up
DPEP3	3.37094753077132e-14	2.52364	0.01	0.002	4.71325883752446e-10	DPEP3	Spot	up
CTSZ	0	2.52247	0.765	0.334	8.08915476254717e-305	CTSZ	Spot	up
SLC31A1	1.91211597764449e-120	2.51727	0.098	0.017	2.67352055994253e-116	SLC31A1	Spot	up
CRACR2A	2.7595958064218e-101	2.51512	0.082	0.014	3.85846685653896e-97	CRACR2A	Spot	up
PDGFA	1.73719908424409e-151	2.51359	0.121	0.021	2.42895175959008e-147	PDGFA	Spot	up
PNPLA7	0	2.50466	0.283	0.057	8.08915476254717e-305	PNPLA7	Spot	up
BTN3A1	2.45680798336404e-116	2.50306	0.095	0.017	3.4351089223396e-112	BTN3A1	Spot	up
MAP3K21	4.5180109633245e-62	2.50306	0.049	0.008	6.31708292892031e-58	MAP3K21	Spot	up
ACAP1	8.42676079637482e-27	2.50118	0.022	0.004	1.17822969454913e-22	ACAP1	Spot	up
ECHDC3	3.22942473928175e-42	2.49563	0.035	0.006	4.51538167046375e-38	ECHDC3	Spot	up
FGD5	1.23625814268945e-103	2.49061	0.086	0.015	1.72853613510839e-99	FGD5	Spot	up
TANC2	0	2.49009	0.357	0.078	8.08915476254717e-305	TANC2	Spot	up
PECAM1	0	2.48797	0.394	0.088	8.08915476254717e-305	PECAM1	Spot	up
UNC5B	1.83406242050098e-118	2.48779	0.096	0.017	2.56438607634447e-114	UNC5B	Spot	up
SLC39A8	2.87349173132941e-30	2.48474	0.023	0.003	4.01771613874478e-26	SLC39A8	Spot	up
TAP2	1.68228386568147e-228	2.47677	0.188	0.037	2.35216930099583e-224	TAP2	Spot	up
AFAP1L1	1.52222192498039e-28	2.47612	0.023	0.004	2.12837069550758e-24	AFAP1L1	Spot	up
OSM	5.69410356468609e-69	2.47605	0.057	0.01	7.96149560414408e-65	OSM	Spot	up
ZNF618	0	2.4759	0.362	0.079	8.08915476254717e-305	ZNF618	Spot	up
CDK6	8.998479523184e-116	2.47575	0.097	0.018	1.25816740693159e-111	CDK6	Spot	up
PPP1R3B	2.70360947673618e-65	2.47353	0.054	0.01	3.78018677037252e-61	PPP1R3B	Spot	up
SECTM1	1.27299414920203e-90	2.46767	0.076	0.014	1.77990041941428e-86	SECTM1	Spot	up
ADAM8	2.77740677811749e-92	2.46271	0.08	0.015	3.88337015716387e-88	ADAM8	Spot	up
TNFSF15	4.74105809094368e-53	2.46176	0.044	0.008	6.62894742275746e-49	TNFSF15	Spot	up
PSMB8	3.03579985858754e-195	2.45072	0.162	0.031	4.2446553622771e-191	PSMB8	Spot	up
SPR	6.10198009569564e-54	2.45058	0.045	0.008	8.53178856980165e-50	SPR	Spot	up
FTCDNL1	1.82631016442133e-66	2.44884	0.055	0.01	2.5535468718939e-62	FTCDNL1	Spot	up
C9orf64	8.09493783923419e-124	2.44604	0.1	0.017	1.13183420868172e-119	C9orf64	Spot	up
OAF	2.63905206985722e-47	2.44211	0.039	0.007	3.68992260407437e-43	OAF	Spot	up
BLOC1S2	1.55456951817717e-118	2.44092	0.101	0.02	2.17359910031532e-114	BLOC1S2	Spot	up
CD93	0	2.43929	0.274	0.06	8.08915476254717e-305	CD93	Spot	up
FHIT	1.32091295295332e-94	2.43755	0.079	0.014	1.84690049081933e-90	FHIT	Spot	up
TMEM14A	7.15090752433056e-28	2.43281	0.022	0.004	9.99839890051899e-24	TMEM14A	Spot	up
NCEH1	2.43532235915494e-128	2.43216	0.11	0.022	3.40506772257044e-124	NCEH1	Spot	up
SCO2	0	2.42959	0.394	0.119	8.08915476254717e-305	SCO2	Spot	up
SAMD9	1.47641018275806e-169	2.42306	0.139	0.026	2.06431671753232e-165	SAMD9	Spot	up
CTSL	0	2.42015	0.366	0.089	8.08915476254717e-305	CTSL	Spot	up
LGALS9	0	2.4174	0.285	0.062	8.08915476254717e-305	LGALS9	Spot	up
SP110	0	2.39889	0.341	0.083	8.08915476254717e-305	SP110	Spot	up
PDGFC	1.67627043528348e-92	2.39858	0.078	0.015	2.34376132261337e-88	PDGFC	Spot	up
PRXL2A	1.20825390291963e-187	2.39088	0.157	0.03	1.68938060706223e-183	PRXL2A	Spot	up
CALHM6	3.83294942845382e-143	2.39074	0.123	0.024	5.35922989086413e-139	CALHM6	Spot	up
SLC36A1	0	2.38969	0.294	0.068	8.08915476254717e-305	SLC36A1	Spot	up
CAPN5	6.00813209853624e-24	2.38342	0.02	0.004	8.40057030017337e-20	CAPN5	Spot	up
NUP210	3.73514690362317e-159	2.38244	0.133	0.026	5.22248240064591e-155	NUP210	Spot	up
C2	0	2.37995	0.304	0.069	8.08915476254717e-305	C2	Spot	up
HSPB1	3.49223358744859e-286	2.3774	0.253	0.06	4.88284100197062e-282	HSPB1	Spot	up
APOC4	2.69264980602387e-64	2.37728	0.056	0.011	3.76486295878257e-60	APOC4	Spot	up
TSHZ3	1.97942301055538e-77	2.37469	0.067	0.013	2.76762925335854e-73	TSHZ3	Spot	up
ABCC3	0	2.37119	0.265	0.059	8.08915476254717e-305	ABCC3	Spot	up
GSDMA	5.50184696463989e-37	2.37041	0.032	0.006	7.69268242595949e-33	GSDMA	Spot	up
CLBA1	4.24834150954998e-21	2.37009	0.017	0.003	5.94003109865278e-17	CLBA1	Spot	up
GRIN3A	2.03549846493466e-14	2.36634	0.011	0.002	2.84603395367165e-10	GRIN3A	Spot	up
AZI2	1.34280872423483e-204	2.36498	0.175	0.036	1.87751515822514e-200	AZI2	Spot	up
TSTD1	2.31788798746123e-62	2.36396	0.054	0.01	3.2408709840683e-58	TSTD1	Spot	up
CD82	7.83814639217138e-190	2.36139	0.162	0.033	1.0959296285534e-185	CD82	Spot	up
SERPINB8	3.45379141732572e-66	2.36123	0.058	0.011	4.82909115970482e-62	SERPINB8	Spot	up
RAP2B	0	2.35793	0.625	0.217	8.08915476254717e-305	RAP2B	Spot	up
SQOR	3.00832359991131e-257	2.35741	0.218	0.046	4.20623805739599e-253	SQOR	Spot	up
PARP14	0	2.35716	0.565	0.178	8.08915476254717e-305	PARP14	Spot	up
NMT2	3.52900053089968e-86	2.35657	0.075	0.014	4.93424854230394e-82	NMT2	Spot	up
PPP1R15A	1.9267084177174e-184	2.35648	0.156	0.031	2.69392370965247e-180	PPP1R15A	Spot	up
FSD1L	1.37132141531886e-29	2.35607	0.025	0.005	1.91738160289883e-25	FSD1L	Spot	up
CIB1	7.6582637875803e-195	2.35254	0.17	0.036	1.07077844277948e-190	CIB1	Spot	up
TNFAIP8	1.79309060887163e-72	2.35252	0.062	0.012	2.50709928932432e-68	TNFAIP8	Spot	up
FABP3	1.59127763814827e-227	2.35072	0.203	0.046	2.22492439365891e-223	FABP3	Spot	up
HPSE	0	2.34887	0.332	0.077	8.08915476254717e-305	HPSE	Spot	up
CABP4	2.94303410516937e-96	2.34842	0.084	0.016	4.11495028584781e-92	CABP4	Spot	up
CARHSP1	1.67516381535959e-67	2.34831	0.054	0.009	2.34221404663577e-63	CARHSP1	Spot	up
DYRK4	7.50641250868333e-219	2.34776	0.188	0.039	1.0495465969641e-214	DYRK4	Spot	up
GSTO1	4.1170328146894e-74	2.34108	0.064	0.012	5.75643528149873e-70	GSTO1	Spot	up
CEACAM19	7.30595280430302e-27	2.34035	0.022	0.004	1.02151832109765e-22	CEACAM19	Spot	up
FMO4	8.58412881280618e-20	2.33894	0.016	0.003	1.20023289060656e-15	FMO4	Spot	up
PPDPF	2.11021980832421e-73	2.33763	0.066	0.014	2.9505093359989e-69	PPDPF	Spot	up
IFITM2	1.11441028250522e-56	2.33758	0.049	0.01	1.5581684569988e-52	IFITM2	Spot	up
AP1S3	3.23032220929226e-43	2.33727	0.037	0.007	4.51663651303244e-39	AP1S3	Spot	up
EIF2AK2	0	2.33543	0.361	0.092	8.08915476254717e-305	EIF2AK2	Spot	up
PSAP	0	2.33126	0.862	0.494	8.08915476254717e-305	PSAP	Spot	up
HERC6	6.97527389467424e-147	2.32964	0.132	0.028	9.75282795953352e-143	HERC6	Spot	up
SPN	7.13728483781373e-142	2.32653	0.124	0.025	9.97935166023116e-138	SPN	Spot	up
DDX60	1.12950119556818e-98	2.3257	0.087	0.017	1.57926857164343e-94	DDX60	Spot	up
LEPR	1.57024348403748e-19	2.3257	0.016	0.003	2.1955144393812e-15	LEPR	Spot	up
ZNF69	1.20142799321103e-63	2.32173	0.055	0.01	1.67983662010766e-59	ZNF69	Spot	up
TMEM44	2.8303307308836e-56	2.31925	0.049	0.01	3.95736842792146e-52	TMEM44	Spot	up
PLEKHA5	1.65007848500348e-58	2.31743	0.052	0.01	2.30713973773187e-54	PLEKHA5	Spot	up
FBXO32	2.88982313445043e-17	2.31743	0.013	0.002	4.04055070658859e-13	FBXO32	Spot	up
MYCBPAP	1.97838065547014e-16	2.31743	0.013	0.002	2.76617183247835e-12	MYCBPAP	Spot	up
KYNU	8.38502733566021e-262	2.31669	0.224	0.048	1.17239452207201e-257	KYNU	Spot	up
C5AR1	1.50967756663513e-155	2.31505	0.136	0.028	2.11083117366924e-151	C5AR1	Spot	up
ARMCX1	5.31280672705518e-109	2.30528	0.096	0.019	7.42836636576855e-105	ARMCX1	Spot	up
SNX20	7.33459516386058e-152	2.30198	0.134	0.028	1.02552309581099e-147	SNX20	Spot	up
GFAP	0	2.29901	0.869	0.432	8.08915476254717e-305	GFAP	Spot	up
TNFSF13	0	2.29183	0.559	0.166	8.08915476254717e-305	TNFSF13	Spot	up
MYO10	2.36278550348932e-81	2.28995	0.072	0.015	3.30364669097877e-77	MYO10	Spot	up
ASAH1	0	2.28688	0.553	0.181	8.08915476254717e-305	ASAH1	Spot	up
PTCH2	2.81255824612946e-18	2.28388	0.015	0.003	3.93251893973821e-14	PTCH2	Spot	up
PARP3	1.79932940243935e-66	2.28279	0.06	0.012	2.51582237049069e-62	PARP3	Spot	up
DHRS4	1.42182432692289e-15	2.27963	0.013	0.002	1.98799477390358e-11	DHRS4	Spot	up
PRXL2C	3.27782029251944e-58	2.27939	0.053	0.011	4.58304833300068e-54	PRXL2C	Spot	up
GOLGA8O	8.31911530651962e-17	2.27875	0.015	0.003	1.16317870215757e-12	GOLGA8O	Spot	up
BCAT2	9.26490517879018e-136	2.27812	0.123	0.027	1.29541904209844e-131	BCAT2	Spot	up
STARD13	0	2.27807	0.327	0.077	8.08915476254717e-305	STARD13	Spot	up
TENT5A	1.2280432404206e-124	2.27528	0.113	0.024	1.71705005875608e-120	TENT5A	Spot	up
TXNRD3	3.89454041167344e-61	2.27173	0.054	0.011	5.44534640360181e-57	TXNRD3	Spot	up
ALDH3B1	2.43905173944684e-185	2.26963	0.165	0.035	3.41028214209457e-181	ALDH3B1	Spot	up
SFI1	4.50947004899153e-206	2.26914	0.183	0.04	6.30514102249996e-202	SFI1	Spot	up
EPS8L1	6.26414194431779e-43	2.26889	0.038	0.008	8.75852326654513e-39	EPS8L1	Spot	up
DNASE1L1	6.81085812673356e-231	2.26365	0.204	0.046	9.52294183279886e-227	DNASE1L1	Spot	up
ZCWPW2	2.32621033293522e-27	2.26339	0.025	0.005	3.25250728751002e-23	ZCWPW2	Spot	up
DENND1B	4.95537575201956e-104	2.26228	0.093	0.019	6.92860637647375e-100	DENND1B	Spot	up
ANTXR2	2.35547605068605e-50	2.26057	0.044	0.009	3.29342661406924e-46	ANTXR2	Spot	up
CELSR3	4.19765412720337e-12	2.25711	0.01	0.002	5.86916000065575e-08	CELSR3	Spot	up
DHRS7	7.46841898177887e-130	2.25678	0.118	0.025	1.04423434203232e-125	DHRS7	Spot	up
FARP1	2.19486828316073e-268	2.25353	0.248	0.062	3.06886483351533e-264	FARP1	Spot	up
PRDX1	4.25111194472292e-95	2.25201	0.086	0.018	5.94390472111159e-91	PRDX1	Spot	up
RAB20	2.68778510978518e-233	2.25174	0.213	0.05	3.75806114050164e-229	RAB20	Spot	up
DSC2	1.17449692606208e-64	2.25133	0.059	0.012	1.64218160202e-60	DSC2	Spot	up
APOBR	0	2.25081	0.517	0.153	8.08915476254717e-305	APOBR	Spot	up
MFGE8	1.92975615134098e-45	2.24727	0.04	0.008	2.69818505080495e-41	MFGE8	Spot	up
FUCA1	3.03974657031291e-254	2.2397	0.236	0.058	4.25017365461152e-250	FUCA1	Spot	up
PLA2G7	0	2.23744	0.315	0.091	8.08915476254717e-305	PLA2G7	Spot	up
GALC	1.72824711334672e-130	2.23525	0.119	0.026	2.41643511388139e-126	GALC	Spot	up
CDKN1A	5.37439932092555e-127	2.23449	0.11	0.022	7.5144851305181e-123	CDKN1A	Spot	up
ZNF347	4.25977580667954e-31	2.22669	0.028	0.006	5.95601853289934e-27	ZNF347	Spot	up
CAST	0	2.22412	0.299	0.073	8.08915476254717e-305	CAST	Spot	up
CD37	0	2.22235	0.514	0.161	8.08915476254717e-305	CD37	Spot	up
THEMIS2	0	2.22101	0.458	0.129	8.08915476254717e-305	THEMIS2	Spot	up
S100A6	0	2.2207	0.396	0.129	8.08915476254717e-305	S100A6	Spot	up
RBM44	2.99434409174667e-13	2.21879	0.011	0.002	4.1866919090802e-09	RBM44	Spot	up
APOL6	0	2.21742	0.3	0.076	8.08915476254717e-305	APOL6	Spot	up
GPRC5B	9.16968917531959e-30	2.21665	0.025	0.005	1.28210594049319e-25	GPRC5B	Spot	up
C11orf80	1.51009863041314e-40	2.21156	0.038	0.008	2.11141990504365e-36	C11orf80	Spot	up
AURKC	5.75218190085232e-29	2.21069	0.026	0.006	8.04270073377171e-25	AURKC	Spot	up
GPD2	1.06564414150913e-121	2.20935	0.111	0.024	1.48998363865806e-117	GPD2	Spot	up
PID1	3.35379366485297e-32	2.2091	0.032	0.007	4.68927430219743e-28	PID1	Spot	up
PMFBP1	7.35164064066851e-62	2.20822	0.056	0.012	1.02790639437827e-57	PMFBP1	Spot	up
CDKN1C	1.13417948669359e-29	2.20706	0.027	0.006	1.58580975829497e-25	CDKN1C	Spot	up
IFIT5	1.3150500172653e-99	2.20665	0.093	0.02	1.83870293414035e-95	IFIT5	Spot	up
DDX58	1.82869730438931e-197	2.2045	0.193	0.049	2.55688457099714e-193	DDX58	Spot	up
MAPK13	6.05050194719578e-206	2.2015	0.194	0.047	8.45981182256914e-202	MAPK13	Spot	up
ARHGEF10	1.51259606199204e-34	2.20134	0.031	0.007	2.11491181387727e-30	ARHGEF10	Spot	up
CTSS	0	2.19797	0.454	0.148	8.08915476254717e-305	CTSS	Spot	up
CLIC1	5.2712474057376e-117	2.19604	0.11	0.025	7.37025812270231e-113	CLIC1	Spot	up
FAM234B	7.61774414294328e-68	2.1959	0.062	0.013	1.06511298606633e-63	FAM234B	Spot	up
HTR7	3.74187103326499e-67	2.19274	0.062	0.013	5.23188407871111e-63	HTR7	Spot	up
SUSD1	5.9474634518785e-265	2.19202	0.256	0.068	8.31574339841652e-261	SUSD1	Spot	up
S100A11	0	2.19198	0.367	0.113	8.08915476254717e-305	S100A11	Spot	up
CETP	2.8459992093143e-22	2.19077	0.019	0.004	3.97927609446326e-18	CETP	Spot	up
RBM43	9.14940121034195e-65	2.19013	0.062	0.014	1.27926927723001e-60	RBM43	Spot	up
CD244	3.65984791058003e-21	2.18848	0.018	0.004	5.11719934857299e-17	CD244	Spot	up
SPATA7	2.95390885163858e-112	2.18801	0.102	0.021	4.13015535636106e-108	SPATA7	Spot	up
EGR2	1.12437780373279e-36	2.18546	0.029	0.005	1.57210504517918e-32	EGR2	Spot	up
LRRC20	2.80712733648336e-18	2.18348	0.017	0.004	3.92492544187104e-14	LRRC20	Spot	up
GM2A	1.27919278349933e-270	2.18302	0.289	0.09	1.78856734988876e-266	GM2A	Spot	up
PARP11	1.9870904543681e-74	2.18261	0.069	0.015	2.77834987329748e-70	PARP11	Spot	up
ATF5	3.16807133412028e-163	2.18007	0.158	0.038	4.42959733936697e-159	ATF5	Spot	up
MT1X	5.27306675518066e-13	2.17966	0.011	0.002	7.37280193709359e-09	MT1X	Spot	up
SLC25A24	3.12957992435296e-155	2.17952	0.145	0.033	4.37577865023031e-151	SLC25A24	Spot	up
CD300E	5.45594222901203e-33	2.17731	0.027	0.005	7.62849842460461e-29	CD300E	Spot	up
NEK11	1.70391631899885e-31	2.17702	0.029	0.006	2.38241579722419e-27	NEK11	Spot	up
C12orf49	2.45536524000034e-27	2.17629	0.025	0.005	3.43309167856847e-23	C12orf49	Spot	up
GRN	0	2.17473	0.475	0.162	8.08915476254717e-305	GRN	Spot	up
SLC46A3	1.63356020948302e-84	2.17331	0.081	0.018	2.28404388489916e-80	SLC46A3	Spot	up
CCDC107	9.22641478855412e-77	2.17326	0.073	0.016	1.29003731573564e-72	CCDC107	Spot	up
SLC16A6	2.8229231334862e-18	2.17179	0.017	0.004	3.94701112524041e-14	SLC16A6	Spot	up
BCAM	1.59244784767162e-20	2.16998	0.018	0.004	2.22656058061446e-16	BCAM	Spot	up
BICD1	1.4106659449664e-269	2.16676	0.299	0.097	1.97239312425202e-265	BICD1	Spot	up
NPC2	0	2.16632	0.551	0.182	8.08915476254717e-305	NPC2	Spot	up
KCNJ5	2.05611981767863e-295	2.16496	0.265	0.063	2.87486672907826e-291	KCNJ5	Spot	up
ANKRD36	3.18955711627286e-54	2.16485	0.051	0.011	4.45963875997271e-50	ANKRD36	Spot	up
SCN1B	0	2.16413	0.299	0.074	8.08915476254717e-305	SCN1B	Spot	up
LONRF1	1.00991801178904e-38	2.16295	0.036	0.008	1.41206736408344e-34	LONRF1	Spot	up
SIGLEC9	1.07801888820474e-294	2.15993	0.273	0.069	1.50728600948787e-290	SIGLEC9	Spot	up
ACER3	1.5731914602767e-74	2.15952	0.071	0.016	2.19963629975888e-70	ACER3	Spot	up
PITX2	4.29814314570502e-22	2.15776	0.024	0.007	6.00966374632476e-18	PITX2	Spot	up
FAXDC2	3.29156570346932e-39	2.15642	0.037	0.008	4.6022671665908e-35	FAXDC2	Spot	up
PRKCH	6.69365079050248e-72	2.1556	0.068	0.015	9.35906253528057e-68	PRKCH	Spot	up
CD68	0	2.15457	0.701	0.309	8.08915476254717e-305	CD68	Spot	up
CLEC10A	1.02239737021062e-11	2.15167	0.01	0.002	1.42951600302849e-07	CLEC10A	Spot	up
SIPA1L1	3.53933628372805e-72	2.15013	0.067	0.014	4.94869999190856e-68	SIPA1L1	Spot	up
ARMC9	2.90593139916285e-51	2.14932	0.049	0.011	4.0630732823095e-47	ARMC9	Spot	up
ICAM2	1.02353607151359e-37	2.14882	0.036	0.008	1.43110813519031e-33	ICAM2	Spot	up
HTATIP2	1.34075759902318e-158	2.14861	0.147	0.033	1.87464727495421e-154	HTATIP2	Spot	up
TGM2	5.23765144825108e-46	2.14813	0.046	0.011	7.32328425494466e-42	TGM2	Spot	up
UPP1	5.07187374620259e-141	2.1432	0.136	0.032	7.09149387194045e-137	UPP1	Spot	up
ITGAX	0	2.14188	0.913	0.506	8.08915476254717e-305	ITGAX	Spot	up
ARMT1	6.47016954118355e-43	2.14014	0.04	0.009	9.04659105248284e-39	ARMT1	Spot	up
FXYD2	6.3445017108093e-12	2.13573	0.01	0.002	8.87088229205357e-08	FXYD2	Spot	up
GSTZ1	2.5064508024859e-29	2.13355	0.028	0.006	3.50451951203579e-25	GSTZ1	Spot	up
PLAAT3	1.58790739605692e-130	2.12797	0.125	0.029	2.22021212116678e-126	PLAAT3	Spot	up
SOWAHC	1.88308280531132e-37	2.12654	0.035	0.008	2.63292637838628e-33	SOWAHC	Spot	up
GBP5	5.48549551949543e-81	2.12621	0.056	0.007	7.6698198353585e-77	GBP5	Spot	up
FCGBP	0	2.12322	0.787	0.366	8.08915476254717e-305	FCGBP	Spot	up
CASP5	9.94614883648472e-24	2.11826	0.022	0.005	1.39067053031729e-19	CASP5	Spot	up
IGSF8	1.30606121159549e-77	2.11652	0.074	0.016	1.82613478605281e-73	IGSF8	Spot	up
ZSCAN18	1.54164792830858e-32	2.11403	0.031	0.007	2.15553213336105e-28	ZSCAN18	Spot	up
MEGF9	1.35268758181358e-23	2.11096	0.022	0.005	1.89132777689175e-19	MEGF9	Spot	up
CCDC24	7.44930551929047e-74	2.10775	0.072	0.017	1.04156189770719e-69	CCDC24	Spot	up
ZNF568	3.41455933014158e-79	2.1074	0.077	0.018	4.77423685540395e-75	ZNF568	Spot	up
G0S2	1.52839426194594e-43	2.10331	0.034	0.006	2.13700085705282e-39	G0S2	Spot	up
CYTL1	1.41629105132e-40	2.10331	0.039	0.009	1.98025814795562e-36	CYTL1	Spot	up
TRDMT1	4.4595455302407e-37	2.10331	0.036	0.008	6.23533656038254e-33	TRDMT1	Spot	up
CFB	8.25896247835416e-129	2.10206	0.121	0.027	1.15476813372348e-124	CFB	Spot	up
CORO1C	0	2.0999	0.352	0.103	8.08915476254717e-305	CORO1C	Spot	up
HIF1A	2.53491207287715e-131	2.09972	0.127	0.03	3.54431406029683e-127	HIF1A	Spot	up
HMGN4	2.81054972858422e-178	2.09816	0.174	0.043	3.92971063050646e-174	HMGN4	Spot	up
TMEM159	3.43806842608421e-43	2.09536	0.041	0.009	4.80710727335095e-39	TMEM159	Spot	up
FMNL2	0	2.08876	0.625	0.233	8.08915476254717e-305	FMNL2	Spot	up
LAG3	1.97663553489899e-30	2.08754	0.03	0.007	2.76373180489577e-26	LAG3	Spot	up
PTER	4.6957669020908e-79	2.08701	0.078	0.018	6.56562128250336e-75	PTER	Spot	up
C1orf162	2.16266581771705e-259	2.08301	0.251	0.065	3.02383934633198e-255	C1orf162	Spot	up
ABCC5	0	2.08117	0.552	0.192	8.08915476254717e-305	ABCC5	Spot	up
RMDN3	6.51902079918627e-179	2.07936	0.198	0.058	9.11489488142225e-175	RMDN3	Spot	up
ANKRD24	1.71984172214588e-46	2.07784	0.044	0.01	2.40468269590437e-42	ANKRD24	Spot	up
RCC1	1.80617941861406e-64	2.07474	0.066	0.016	2.52540006310617e-60	RCC1	Spot	up
THBD	1.11814284994259e-46	2.06983	0.047	0.011	1.56338733278973e-42	THBD	Spot	up
CTSF	2.29635086526331e-101	2.06633	0.104	0.026	3.21075777981116e-97	CTSF	Spot	up
RELB	6.47694239877314e-121	2.06573	0.114	0.026	9.05606086196461e-117	RELB	Spot	up
KLF11	4.84931376369335e-71	2.06471	0.07	0.016	6.78031050439605e-67	KLF11	Spot	up
SERPINA1	0	2.06429	0.348	0.103	8.08915476254717e-305	SERPINA1	Spot	up
FKBP5	1.03701491320772e-69	2.06405	0.065	0.014	1.44995425164704e-65	FKBP5	Spot	up
NENF	1.92153734177382e-157	2.06342	0.156	0.038	2.68669351126815e-153	NENF	Spot	up
C17orf107	2.15004328675981e-12	2.06267	0.012	0.003	3.00619052354757e-08	C17orf107	Spot	up
GPR161	1.37060424241579e-17	2.05631	0.017	0.004	1.91637885174576e-13	GPR161	Spot	up
MAFF	1.27506890009389e-51	2.05172	0.052	0.012	1.78280133611128e-47	MAFF	Spot	up
EMP3	8.0096312278021e-118	2.04752	0.118	0.029	1.11990663827129e-113	EMP3	Spot	up
CASP4	4.25124043490585e-163	2.04672	0.162	0.04	5.94408437608537e-159	CASP4	Spot	up
CPNE2	1.31237145547125e-71	2.04603	0.072	0.017	1.8349577690399e-67	CPNE2	Spot	up
UBL4A	3.91218420363046e-17	2.04521	0.016	0.004	5.47001595351611e-13	UBL4A	Spot	up
CCNE1	2.03129039934295e-20	2.04476	0.019	0.004	2.84015023636132e-16	CCNE1	Spot	up
STAT2	0	2.04364	0.5	0.184	8.08915476254717e-305	STAT2	Spot	up
TRERF1	7.64718874367232e-117	2.0436	0.122	0.031	1.06922993014026e-112	TRERF1	Spot	up
CXCL16	0	2.0424	0.402	0.122	8.08915476254717e-305	CXCL16	Spot	up
SLC46A1	1.63607798682021e-122	2.04191	0.123	0.03	2.28756424117201e-118	SLC46A1	Spot	up
TSPYL5	5.78652650791119e-40	2.04048	0.039	0.009	8.09072136336143e-36	TSPYL5	Spot	up
AKR1B1	0	2.03917	0.442	0.146	8.08915476254717e-305	AKR1B1	Spot	up
PLSCR1	0	2.03761	0.338	0.103	8.08915476254717e-305	PLSCR1	Spot	up
AHCY	5.6383642328209e-63	2.03733	0.064	0.016	7.88356087033018e-59	AHCY	Spot	up
IL20RB	9.6975138010569e-18	2.03707	0.017	0.004	1.35590637966378e-13	IL20RB	Spot	up
ZNF493	9.28815126296639e-113	2.03693	0.115	0.028	1.29866930958796e-108	ZNF493	Spot	up
IRF9	1.31958462651174e-267	2.03615	0.266	0.072	1.84504322478871e-263	IRF9	Spot	up
TTLL4	1.26580808267898e-134	2.03432	0.138	0.035	1.76985286120175e-130	TTLL4	Spot	up
TES	3.2306070537323e-98	2.03128	0.098	0.023	4.51703478252851e-94	TES	Spot	up
CTSH	0	2.03112	0.474	0.152	8.08915476254717e-305	CTSH	Spot	up
SKOR1	9.39108144321397e-13	2.02931	0.012	0.003	1.31306100739018e-08	SKOR1	Spot	up
MUC20	9.03359490234213e-95	2.029	0.098	0.025	1.26307723924548e-90	MUC20	Spot	up
ELL2	0	2.0273	0.38	0.125	8.08915476254717e-305	ELL2	Spot	up
SMPDL3A	3.6297864199517e-181	2.02607	0.181	0.046	5.07516737237647e-177	SMPDL3A	Spot	up
DHX58	1.03176423678673e-207	2.02565	0.213	0.057	1.4426127558752e-203	DHX58	Spot	up
DDX60L	2.35350098086766e-274	2.0249	0.3	0.095	3.29066507144916e-270	DDX60L	Spot	up
NECTIN1	2.40891447588798e-18	2.02387	0.018	0.004	3.36814422018657e-14	NECTIN1	Spot	up
SLC20A2	3.24400441749106e-56	2.02306	0.056	0.013	4.53576697653599e-52	SLC20A2	Spot	up
PLXNA1	2.92695615379266e-171	2.0183	0.177	0.047	4.0924700942329e-167	PLXNA1	Spot	up
TRIP6	1.84564350073427e-243	2.01771	0.242	0.065	2.58057874272665e-239	TRIP6	Spot	up
SLC19A2	2.37240815551409e-19	2.01689	0.019	0.004	3.3171010830398e-15	SLC19A2	Spot	up
ZNF558	6.30979751621147e-53	2.01639	0.053	0.012	8.82235888716688e-49	ZNF558	Spot	up
SPEF2	4.17074852433327e-32	2.01612	0.034	0.008	5.83154058672278e-28	SPEF2	Spot	up
TRMT5	6.56999053681741e-54	2.01463	0.055	0.013	9.1861607685781e-50	TRMT5	Spot	up
TOR3A	2.76710430121848e-88	2.01241	0.09	0.022	3.86896523396368e-84	TOR3A	Spot	up
BTBD19	3.40763836635522e-95	2.0098	0.098	0.025	4.76455996383787e-91	BTBD19	Spot	up
CRYL1	4.90232954371506e-155	2.00944	0.155	0.039	6.8544371680224e-151	CRYL1	Spot	up
ARSD	4.48562608211253e-60	2.00888	0.062	0.015	6.27180238800973e-56	ARSD	Spot	up
FABP5	7.0778547665905e-28	2.00876	0.028	0.007	9.89625653464683e-24	FABP5	Spot	up
EVI2B	8.62453638421208e-246	2.00577	0.251	0.069	1.20588267724053e-241	EVI2B	Spot	up
GLIPR2	8.06680682324317e-27	2.00575	0.028	0.007	1.12790093002586e-22	GLIPR2	Spot	up
C5	2.95901115757533e-29	2.00485	0.03	0.007	4.13728940052183e-25	C5	Spot	up
FHAD1	3.54881773975488e-115	2.00477	0.116	0.029	4.96195696372527e-111	FHAD1	Spot	up
YBX3	9.22900862502381e-243	2.00432	0.242	0.065	1.29039998595083e-238	YBX3	Spot	up
FCER1G	0	2.00388	0.464	0.151	8.08915476254717e-305	FCER1G	Spot	up
IL15RA	5.00166447341073e-31	2.00004	0.031	0.008	6.99332726672288e-27	IL15RA	Spot	up
TALDO1	3.53530187135715e-256	1.99991	0.27	0.079	4.94305907653156e-252	TALDO1	Spot	up
TMEM51	6.88954393474015e-216	1.99958	0.22	0.059	9.63296032955367e-212	TMEM51	Spot	up
S1PR2	1.06470811467801e-36	1.99947	0.038	0.01	1.48867488594279e-32	S1PR2	Spot	up
CHI3L2	8.00025457998832e-19	1.99947	0.015	0.003	1.11859559537397e-14	CHI3L2	Spot	up
F8	1.92279055538763e-12	1.99639	0.012	0.003	2.68844575454299e-08	F8	Spot	up
SGK1	0	1.99493	0.619	0.291	8.08915476254717e-305	SGK1	Spot	up
CLDN23	6.39298677617717e-54	1.99228	0.057	0.014	8.93867411045092e-50	CLDN23	Spot	up
CLEC9A	1.55933307101228e-56	1.9889	0.057	0.014	2.18025949988936e-52	CLEC9A	Spot	up
HORMAD1	1.9872076800973e-36	1.98621	0.038	0.009	2.77851377831205e-32	HORMAD1	Spot	up
HSD17B14	0	1.98563	0.317	0.094	8.08915476254717e-305	HSD17B14	Spot	up
MS4A6A	0	1.98355	0.815	0.345	8.08915476254717e-305	MS4A6A	Spot	up
CCDC89	5.86422385801772e-12	1.98301	0.01	0.002	8.19935779828038e-08	CCDC89	Spot	up
PDPN	6.58894949314075e-118	1.98175	0.116	0.028	9.2126691813094e-114	PDPN	Spot	up
GNS	7.53867856980546e-230	1.98165	0.235	0.064	1.0540580376302e-225	GNS	Spot	up
CLEC4A	2.25096180019854e-194	1.97924	0.2	0.054	3.1472947890376e-190	CLEC4A	Spot	up
LAP3	3.93106963557278e-269	1.9772	0.285	0.085	5.49642156445787e-265	LAP3	Spot	up
ZBED3	1.15949944477962e-83	1.97717	0.087	0.021	1.62121212369087e-79	ZBED3	Spot	up
RNH1	4.77419481228711e-291	1.97606	0.302	0.089	6.67527918653984e-287	RNH1	Spot	up
SLC26A11	2.72692616071597e-238	1.97468	0.274	0.089	3.81278815791306e-234	SLC26A11	Spot	up
TAGLN2	6.37205597063676e-76	1.97296	0.078	0.019	8.90940865814432e-72	TAGLN2	Spot	up
SNAPC2	2.31764341034103e-48	1.97235	0.05	0.012	3.24052901633883e-44	SNAPC2	Spot	up
MAP4K1	2.0315675579911e-144	1.97176	0.151	0.04	2.84053775958315e-140	MAP4K1	Spot	up
IQSEC1	0	1.9716	0.435	0.157	8.08915476254717e-305	IQSEC1	Spot	up
CACNA1F	8.77451258757918e-16	1.97004	0.014	0.003	1.22685234999532e-11	CACNA1F	Spot	up
CCDC62	6.56988283473368e-15	1.97004	0.014	0.003	9.18601017952464e-11	CCDC62	Spot	up
SHISAL2A	1.15899759264736e-10	1.96838	0.011	0.003	1.62051043403954e-06	SHISAL2A	Spot	up
PHETA1	1.28726667698609e-42	1.96448	0.045	0.011	1.79985626776195e-38	PHETA1	Spot	up
AGAP3	1.23592384369179e-128	1.96326	0.136	0.036	1.72806871824986e-124	AGAP3	Spot	up
CXCL1	2.57447314696511e-38	1.96245	0.032	0.006	3.59962835408661e-34	CXCL1	Spot	up
KLHL42	2.80141768388563e-80	1.96223	0.085	0.022	3.91694220560888e-76	KLHL42	Spot	up
DMXL2	2.32454780398504e-244	1.96222	0.256	0.073	3.25018273953188e-240	DMXL2	Spot	up
SCARB2	5.72392592667105e-114	1.96097	0.122	0.032	8.00319323067146e-110	SCARB2	Spot	up
ERBB2	1.1091128116226e-17	1.95892	0.017	0.004	1.55076153321071e-13	ERBB2	Spot	up
ERGIC1	1.40682259169687e-89	1.95772	0.095	0.024	1.96701934771057e-85	ERGIC1	Spot	up
TMEM144	2.76551116076054e-165	1.95479	0.17	0.044	3.86673770497538e-161	TMEM144	Spot	up
SSX2IP	1.63175754526434e-13	1.95373	0.014	0.003	2.28152339978859e-09	SSX2IP	Spot	up
MS4A7	0	1.95269	0.849	0.416	8.08915476254717e-305	MS4A7	Spot	up
YWHAZ	2.19335250802466e-198	1.9513	0.21	0.058	3.06674547672008e-194	YWHAZ	Spot	up
EEF1AKMT3	2.29028073312078e-62	1.9513	0.068	0.018	3.20227052104947e-58	EEF1AKMT3	Spot	up
ZSCAN20	2.18160990277662e-22	1.9513	0.023	0.006	3.05032696606227e-18	ZSCAN20	Spot	up
MYL12A	1.97971919223811e-16	1.9513	0.016	0.004	2.76804337458733e-12	MYL12A	Spot	up
SEMA4F	3.12989972338251e-20	1.94658	0.021	0.005	4.37622579323342e-16	SEMA4F	Spot	up
DNAH14	4.20216471465323e-38	1.94563	0.04	0.01	5.87546670402815e-34	DNAH14	Spot	up
SERINC5	1.70513910413084e-130	1.94452	0.14	0.038	2.38412549539575e-126	SERINC5	Spot	up
JPT1	2.73550199835391e-104	1.94427	0.112	0.03	3.82477889409844e-100	JPT1	Spot	up
RAB27A	9.00771685184831e-51	1.94237	0.054	0.014	1.25945897022543e-46	RAB27A	Spot	up
ZRSR2	1.57957829366135e-173	1.94069	0.187	0.052	2.2085663701973e-169	ZRSR2	Spot	up
HIP1	8.92693809708471e-25	1.93981	0.026	0.006	1.24816448473438e-20	HIP1	Spot	up
TXNIP	0	1.93936	0.545	0.205	8.08915476254717e-305	TXNIP	Spot	up
HEATR3	2.53088354693377e-128	1.93769	0.137	0.036	3.5386813753228e-124	HEATR3	Spot	up
PRKAR1B	4.83583320124338e-22	1.93575	0.023	0.006	6.76146198197849e-18	PRKAR1B	Spot	up
RTL6	2.83452276834814e-31	1.93338	0.033	0.008	3.96322973470437e-27	RTL6	Spot	up
SPTBN5	5.02938256555826e-28	1.93338	0.029	0.007	7.03208270316356e-24	SPTBN5	Spot	up
MOSPD2	4.00571690019779e-185	1.93247	0.204	0.059	5.60079336985654e-181	MOSPD2	Spot	up
BMF	1.70660435992541e-305	1.93016	0.328	0.103	2.38617421604771e-301	BMF	Spot	up
SRD5A3	6.2394917103234e-23	1.92746	0.024	0.006	8.72405730937418e-19	SRD5A3	Spot	up
ARHGAP24	3.74658287207703e-196	1.92469	0.212	0.061	5.23847217173811e-192	ARHGAP24	Spot	up
FLACC1	1.01207967786593e-16	1.92434	0.018	0.005	1.41508980559215e-12	FLACC1	Spot	up
PTRHD1	6.22867529046659e-35	1.92349	0.038	0.01	8.70893379113039e-31	PTRHD1	Spot	up
MTCL1	1.97470261284459e-24	1.9231	0.026	0.007	2.7610291932793e-20	MTCL1	Spot	up
PHETA2	4.92855278558391e-33	1.9217	0.036	0.01	6.89110250480342e-29	PHETA2	Spot	up
FAM210B	3.49120734275225e-15	1.92147	0.015	0.004	4.88140610663619e-11	FAM210B	Spot	up
COL27A1	7.89383872902509e-20	1.9211	0.022	0.006	1.10371653109229e-15	COL27A1	Spot	up
STX2	3.0153159147769e-246	1.91884	0.255	0.071	4.21601471204106e-242	STX2	Spot	up
HMOX1	0	1.918	0.554	0.233	8.08915476254717e-305	HMOX1	Spot	up
ANG	1.05478618297973e-32	1.91775	0.035	0.009	1.47480204104226e-28	ANG	Spot	up
EML2	5.4994500894338e-103	1.91681	0.115	0.032	7.68933111504634e-99	EML2	Spot	up
CEP70	2.96359614004524e-26	1.91671	0.027	0.007	4.14370012301126e-22	CEP70	Spot	up
CDC25B	1.34474763677683e-201	1.91667	0.215	0.06	1.88022614574137e-197	CDC25B	Spot	up
OSCAR	5.86608906191809e-204	1.9156	0.232	0.071	8.20196572637388e-200	OSCAR	Spot	up
TNK2	0	1.9153	0.466	0.158	8.08915476254717e-305	TNK2	Spot	up
UBXN11	1.05758302450344e-213	1.91352	0.238	0.072	1.47871258486071e-209	UBXN11	Spot	up
HNMT	3.48633468195017e-205	1.9135	0.224	0.065	4.87459315230273e-201	HNMT	Spot	up
BST2	0	1.91331	0.519	0.191	8.08915476254717e-305	BST2	Spot	up
SLC3A2	2.27914246450768e-239	1.91268	0.263	0.08	3.18669699387463e-235	SLC3A2	Spot	up
KLF6	0	1.91066	0.411	0.124	8.08915476254717e-305	KLF6	Spot	up
TUBB2A	1.70900455011922e-22	1.91066	0.023	0.006	2.38953016197669e-18	TUBB2A	Spot	up
GLTP	2.00347342898483e-16	1.91066	0.016	0.004	2.80125654840659e-12	GLTP	Spot	up
PTPN7	4.27253906634979e-94	1.90988	0.1	0.026	5.97386412257028e-90	PTPN7	Spot	up
C3AR1	1.19801334657345e-202	1.90963	0.213	0.058	1.67506226117899e-198	C3AR1	Spot	up
ADARB1	1.44100196043071e-71	1.90872	0.081	0.022	2.01480894107422e-67	ADARB1	Spot	up
CYTIP	2.12676395658462e-149	1.90782	0.16	0.043	2.97364136409662e-145	CYTIP	Spot	up
IFT22	7.79985257709605e-19	1.90627	0.019	0.005	1.09057538732957e-14	IFT22	Spot	up
PIGW	1.71771858285946e-18	1.90627	0.019	0.005	2.40171412255409e-14	PIGW	Spot	up
DTX3L	4.42803257706605e-196	1.90519	0.219	0.065	6.19127514925375e-192	DTX3L	Spot	up
MB21D2	2.45300360927347e-30	1.90337	0.033	0.009	3.42978964648617e-26	MB21D2	Spot	up
ARMCX2	7.79025214659181e-113	1.90215	0.126	0.035	1.08923305513647e-108	ARMCX2	Spot	up
ANKEF1	1.58691258046953e-16	1.90126	0.017	0.005	2.2188211700125e-12	ANKEF1	Spot	up
KCNAB2	0	1.9005	0.361	0.121	8.08915476254717e-305	KCNAB2	Spot	up
CHCHD10	1.60496638370099e-96	1.89745	0.105	0.028	2.24406399769073e-92	CHCHD10	Spot	up
MPV17L	1.2684305492498e-17	1.89745	0.019	0.005	1.77351959396107e-13	MPV17L	Spot	up
HEBP1	1.93176791330701e-71	1.89699	0.081	0.022	2.70099789638587e-67	HEBP1	Spot	up
NME1	4.50840709527525e-54	1.89667	0.058	0.015	6.30365480061385e-50	NME1	Spot	up
ZNF774	2.19305418518839e-11	1.89587	0.011	0.003	3.06632836173041e-07	ZNF774	Spot	up
CCDC32	1.10819024662147e-134	1.894	0.146	0.04	1.54947160282613e-130	CCDC32	Spot	up
ZNF230	5.83733015056409e-14	1.89385	0.014	0.004	8.16175501651871e-10	ZNF230	Spot	up
CPT1A	9.03454553468331e-32	1.8918	0.034	0.009	1.26321015665942e-27	CPT1A	Spot	up
SLC49A3	1.4584461293385e-195	1.89013	0.217	0.063	2.03919937804109e-191	SLC49A3	Spot	up
TIMP1	5.53739895369346e-60	1.88874	0.062	0.015	7.74239121705419e-56	TIMP1	Spot	up
C17orf97	3.71117216446454e-37	1.88668	0.041	0.011	5.18896092035432e-33	C17orf97	Spot	up
AIFM2	8.76677312893592e-50	1.88503	0.056	0.015	1.22577021888782e-45	AIFM2	Spot	up
FBXL8	1.23127102393913e-39	1.88467	0.043	0.011	1.72156314567169e-35	FBXL8	Spot	up
GSAP	2.05301881015121e-194	1.88353	0.213	0.062	2.87053090035342e-190	GSAP	Spot	up
PARP10	1.00543207916899e-172	1.88292	0.194	0.057	1.40579513309408e-168	PARP10	Spot	up
PILRA	4.10553967715601e-145	1.88234	0.164	0.047	5.74036557659954e-141	PILRA	Spot	up
C1orf198	1.14397359825209e-33	1.88218	0.037	0.01	1.59950388507608e-29	C1orf198	Spot	up
TP53I3	1.08127248434462e-81	1.88216	0.09	0.024	1.51183518761065e-77	TP53I3	Spot	up
RASSF4	0	1.88214	0.635	0.263	8.08915476254717e-305	RASSF4	Spot	up
TSHZ1	5.44914030766382e-35	1.87972	0.039	0.01	7.61898797817556e-31	TSHZ1	Spot	up
HCST	9.29024689007843e-30	1.8772	0.031	0.008	1.29896232017077e-25	HCST	Spot	up
AIFM3	1.13208392160239e-126	1.8759	0.141	0.039	1.58287973918446e-122	AIFM3	Spot	up
AP2S1	1.4370241563645e-51	1.87566	0.057	0.015	2.00924717542885e-47	AP2S1	Spot	up
IRF1	1.374970345982e-139	1.87518	0.151	0.041	1.92248353775203e-135	IRF1	Spot	up
TSPAN15	2.29870623676061e-153	1.87221	0.171	0.048	3.21405106023868e-149	TSPAN15	Spot	up
SIGIRR	1.47327016554625e-57	1.8718	0.065	0.018	2.05992634546677e-53	SIGIRR	Spot	up
DZIP1L	2.23450704989695e-197	1.86991	0.215	0.062	3.12428775716591e-193	DZIP1L	Spot	up
CTSB	0	1.86899	0.768	0.446	8.08915476254717e-305	CTSB	Spot	up
ATP10A	1.30094922830866e-35	1.86809	0.041	0.011	1.81898721102116e-31	ATP10A	Spot	up
LTB	1.3955565396099e-29	1.86802	0.036	0.011	1.95126715368256e-25	LTB	Spot	up
ERMN	1.94396377726599e-28	1.86775	0.03	0.008	2.71805015337331e-24	ERMN	Spot	up
AKAP7	2.79475556436173e-64	1.86437	0.072	0.019	3.90762723009058e-60	AKAP7	Spot	up
RSPH3	6.31261267785418e-97	1.86285	0.11	0.03	8.82629504617571e-93	RSPH3	Spot	up
PML	5.40686042453724e-232	1.8623	0.259	0.079	7.55987224558797e-228	PML	Spot	up
VAV2	5.90722185107816e-45	1.86105	0.05	0.013	8.25947759217748e-41	VAV2	Spot	up
GOLM1	7.61733916093862e-61	1.85877	0.069	0.019	1.06505636148244e-56	GOLM1	Spot	up
PDE8A	1.81022694743232e-257	1.85826	0.284	0.088	2.53105931789987e-253	PDE8A	Spot	up
CREB5	1.1517549828062e-153	1.85777	0.172	0.049	1.61038381695963e-149	CREB5	Spot	up
SPP1	0	1.85395	0.62	0.377	8.08915476254717e-305	SPP1	Spot	up
UBE2D1	1.18276712132429e-22	1.85333	0.025	0.007	1.65374498903563e-18	UBE2D1	Spot	up
PRKN	7.53771188398927e-102	1.85259	0.114	0.031	1.05392287561938e-97	PRKN	Spot	up
VENTX	3.33019399198584e-233	1.85177	0.263	0.081	4.6562772395946e-229	VENTX	Spot	up
RTL8A	6.1588884762106e-18	1.85177	0.019	0.005	8.61135786743765e-14	RTL8A	Spot	up
TACC3	1.57871986040477e-103	1.85064	0.112	0.03	2.20736610881796e-99	TACC3	Spot	up
SMIM4	2.60352365872765e-34	1.85024	0.038	0.01	3.640246779633e-30	SMIM4	Spot	up
POLE4	1.24407300386781e-76	1.85002	0.086	0.023	1.73946287400797e-72	POLE4	Spot	up
TNF	1.60704377845501e-43	1.84933	0.045	0.011	2.24696861103579e-39	TNF	Spot	up
PPARGC1B	1.12071655323122e-178	1.84923	0.204	0.061	1.5669858847279e-174	PPARGC1B	Spot	up
HAPLN3	1.07299181715762e-27	1.84912	0.024	0.005	1.50025715874979e-23	HAPLN3	Spot	up
SLC29A2	1.4630502812523e-19	1.84827	0.02	0.005	2.04563690324697e-15	SLC29A2	Spot	up
MYD88	3.25523126410326e-227	1.84776	0.256	0.079	4.55146435346918e-223	MYD88	Spot	up
APOC2	1.30220321239889e-236	1.84762	0.344	0.145	1.82074053157613e-232	APOC2	Spot	up
CD58	8.36175197955047e-108	1.84489	0.123	0.035	1.16914016178075e-103	CD58	Spot	up
SHLD2	1.37846834012783e-42	1.84249	0.049	0.013	1.92737443316673e-38	SHLD2	Spot	up
AGA	1.05444016604341e-82	1.84083	0.095	0.027	1.47431824016189e-78	AGA	Spot	up
SOX4	8.80968458366359e-30	1.84027	0.033	0.009	1.23177009848784e-25	SOX4	Spot	up
HIST1H4J	3.96368539393399e-12	1.84027	0.011	0.003	5.5420249177985e-08	HIST1H4J	Spot	up
F11R	9.14271691541088e-126	1.83992	0.143	0.04	1.27833467911275e-121	F11R	Spot	up
CCDC154	1.13405996366994e-114	1.83988	0.129	0.036	1.58564264120331e-110	CCDC154	Spot	up
AMFR	3.14653459081337e-135	1.83861	0.153	0.044	4.39948466487526e-131	AMFR	Spot	up
ATP6V1F	9.84304894991291e-147	1.83789	0.177	0.055	1.37625510417682e-142	ATP6V1F	Spot	up
ASGR1	1.31576758807368e-17	1.8375	0.019	0.005	1.83970624164463e-13	ASGR1	Spot	up
TBC1D32	1.49392095218399e-17	1.8375	0.019	0.005	2.08880027534366e-13	TBC1D32	Spot	up
RFX2	1.03631541798631e-16	1.83412	0.018	0.005	1.44897621742846e-12	RFX2	Spot	up
C1QB	0	1.83369	0.587	0.248	8.08915476254717e-305	C1QB	Spot	up
RRM2B	7.19743130163304e-35	1.83352	0.04	0.011	1.00634484459433e-30	RRM2B	Spot	up
LGMN	0	1.83045	0.586	0.252	8.08915476254717e-305	LGMN	Spot	up
RBP7	2.16375652886462e-14	1.82993	0.016	0.004	3.02536437865852e-10	RBP7	Spot	up
SOAT1	3.6739024000135e-127	1.8265	0.146	0.042	5.13685033569888e-123	SOAT1	Spot	up
EMILIN1	6.94549508814413e-18	1.82577	0.018	0.005	9.71119123224313e-14	EMILIN1	Spot	up
CRTAP	4.88680895284265e-264	1.82541	0.298	0.095	6.8327362778646e-260	CRTAP	Spot	up
ZC2HC1A	1.15518699505184e-89	1.82347	0.102	0.028	1.61518245648149e-85	ZC2HC1A	Spot	up
SEC22C	2.14650972739797e-64	1.82175	0.073	0.02	3.00124990084785e-60	SEC22C	Spot	up
ZNF572	6.26331259833872e-20	1.82058	0.022	0.006	8.7573636749972e-16	ZNF572	Spot	up
PCK2	7.51245176044709e-122	1.81796	0.141	0.041	1.05039100514571e-117	PCK2	Spot	up
CCL8	5.1708036787125e-121	1.81793	0.105	0.02	7.22981770357582e-117	CCL8	Spot	up
AXL	0	1.81659	0.522	0.2	8.08915476254717e-305	AXL	Spot	up
PBDC1	9.24132035141296e-68	1.81603	0.078	0.022	1.29212141153456e-63	PBDC1	Spot	up
ITGA11	1.19170982891072e-12	1.81603	0.013	0.004	1.66624868278297e-08	ITGA11	Spot	up
TMSB10	0	1.81597	0.712	0.39	8.08915476254717e-305	TMSB10	Spot	up
SIRPD	6.6812051126116e-19	1.8138	0.02	0.005	9.34166098845354e-15	SIRPD	Spot	up
METTL1	2.14278446329682e-44	1.81351	0.05	0.014	2.99604123658161e-40	METTL1	Spot	up
LFNG	3.21632312214456e-107	1.81325	0.127	0.037	4.49706298938252e-103	LFNG	Spot	up
PELI3	3.03339700816285e-53	1.81292	0.063	0.018	4.24129569681329e-49	PELI3	Spot	up
KLHL6	0	1.8127	0.399	0.161	8.08915476254717e-305	KLHL6	Spot	up
TNS1	8.89060481072968e-101	1.81055	0.122	0.037	1.24308436463622e-96	TNS1	Spot	up
FAM200B	6.07053008979812e-54	1.81042	0.06	0.016	8.48781517155573e-50	FAM200B	Spot	up
LAPTM4A	2.54617796897178e-125	1.80947	0.147	0.043	3.56006603621634e-121	LAPTM4A	Spot	up
ARHGAP8	4.0337639376363e-77	1.80922	0.091	0.026	5.64000873760308e-73	ARHGAP8	Spot	up
USP54	8.08776783540739e-23	1.8083	0.027	0.008	1.13083169874666e-18	USP54	Spot	up
ACOT11	6.68847648198109e-228	1.8081	0.252	0.075	9.35182781710596e-224	ACOT11	Spot	up
PHYH	9.3765500350045e-36	1.80771	0.041	0.011	1.31102922589433e-31	PHYH	Spot	up
DCBLD2	4.9475285256234e-33	1.80375	0.037	0.01	6.91763438452664e-29	DCBLD2	Spot	up
METTL27	5.68380671168455e-72	1.8008	0.082	0.022	7.94709854427734e-68	METTL27	Spot	up
AHI1	3.51747363463367e-87	1.80024	0.101	0.028	4.91813163594479e-83	AHI1	Spot	up
MROH7	5.07506939205796e-132	1.79894	0.152	0.044	7.09596202397544e-128	MROH7	Spot	up
PYCR3	7.81651323310944e-21	1.79845	0.023	0.006	1.09290488025336e-16	PYCR3	Spot	up
ANXA5	0	1.79722	0.469	0.174	8.08915476254717e-305	ANXA5	Spot	up
SLC11A1	5.49583058485384e-300	1.79687	0.416	0.18	7.68427032374264e-296	SLC11A1	Spot	up
KCNMB1	7.39612312690124e-164	1.7966	0.197	0.061	1.03412593560333e-159	KCNMB1	Spot	up
TNFSF8	1.23006877520181e-52	1.79479	0.062	0.018	1.71988216148717e-48	TNFSF8	Spot	up
GLMP	9.77944565982593e-138	1.794	0.164	0.049	1.36736209215686e-133	GLMP	Spot	up
GALE	1.93265959022627e-98	1.7896	0.118	0.035	2.70224463905437e-94	GALE	Spot	up
FAM20C	5.56694439244612e-170	1.789	0.206	0.066	7.78370164951816e-166	FAM20C	Spot	up
ZMIZ1	6.57418070854643e-108	1.78797	0.129	0.038	9.19201946668962e-104	ZMIZ1	Spot	up
LMX1B	1.78287133453037e-22	1.78781	0.032	0.011	2.49281069994036e-18	LMX1B	Spot	up
TIPARP	7.27530970597341e-49	1.787	0.057	0.016	1.0172338030892e-44	TIPARP	Spot	up
FAHD2B	3.56795292518277e-11	1.78683	0.012	0.003	4.98871177999055e-07	FAHD2B	Spot	up
HEXA	0	1.7853	0.571	0.265	8.08915476254717e-305	HEXA	Spot	up
RAB9A	5.0889269355077e-60	1.78513	0.07	0.02	7.11533764122686e-56	RAB9A	Spot	up
GALNT12	4.29970808296673e-17	1.78478	0.019	0.005	6.01185184160408e-13	GALNT12	Spot	up
TMEM251	3.3164525747997e-113	1.78473	0.13	0.037	4.63706399008494e-109	TMEM251	Spot	up
FAM71F2	1.59981740061173e-25	1.78467	0.029	0.008	2.23686468953532e-21	FAM71F2	Spot	up
SLC7A9	2.22262535134246e-09	1.78449	0.01	0.003	3.10767476624703e-05	SLC7A9	Spot	up
SLFN12	3.27207499038693e-50	1.78419	0.057	0.016	4.575015251559e-46	SLFN12	Spot	up
TTC4	1.0597442253879e-57	1.78322	0.07	0.02	1.48173437593737e-53	TTC4	Spot	up
NT5DC1	6.87522390972046e-44	1.77754	0.051	0.014	9.61293807057115e-40	NT5DC1	Spot	up
SLC2A6	6.64829030225735e-16	1.77708	0.015	0.003	9.29563950061622e-12	SLC2A6	Spot	up
IFI27L2	4.60064977381806e-69	1.77634	0.083	0.024	6.43262851375241e-65	IFI27L2	Spot	up
GRAMD4	1.33183426535829e-211	1.77616	0.257	0.085	1.86217066982397e-207	GRAMD4	Spot	up
LTA4H	4.75202129477963e-235	1.77439	0.325	0.129	6.64427617436087e-231	LTA4H	Spot	up
ZNF331	9.46119385654614e-85	1.77374	0.1	0.029	1.32286412502228e-80	ZNF331	Spot	up
ZNF600	2.35594013308327e-28	1.77316	0.032	0.009	3.29407549407703e-24	ZNF600	Spot	up
APOL2	2.06136920168405e-146	1.77262	0.176	0.054	2.88220641779464e-142	APOL2	Spot	up
NCF2	0	1.77233	0.429	0.162	8.08915476254717e-305	NCF2	Spot	up
RHOC	2.1106884776341e-193	1.77069	0.225	0.069	2.95116462942799e-189	RHOC	Spot	up
COX5B	9.5308288327336e-37	1.77006	0.043	0.012	1.33260048739281e-32	COX5B	Spot	up
FANCF	5.69761591238892e-51	1.76934	0.062	0.018	7.96640656870219e-47	FANCF	Spot	up
PUDP	2.22661649930971e-09	1.76889	0.01	0.003	3.11325518933484e-05	PUDP	Spot	up
TSNARE1	9.77656649501593e-202	1.76881	0.249	0.083	1.36695952733313e-197	TSNARE1	Spot	up
AC118549.1	3.5278155820735e-140	1.76763	0.184	0.062	4.93259174685516e-136	AC118549.1	Spot	up
DYNLT1	1.09598814495211e-129	1.76581	0.16	0.05	1.53241062427204e-125	DYNLT1	Spot	up
DNAJC15	1.3262543260354e-79	1.7657	0.093	0.026	1.8543687986627e-75	DNAJC15	Spot	up
ZNF296	2.34975377023347e-23	1.76531	0.028	0.008	3.28542572154044e-19	ZNF296	Spot	up
EVA1B	1.24518649244713e-100	1.7652	0.12	0.036	1.74101975373957e-96	EVA1B	Spot	up
SHFL	9.17020766151387e-271	1.76432	0.333	0.119	1.28217843523287e-266	SHFL	Spot	up
LACTB	2.49698721526726e-67	1.76395	0.08	0.023	3.49128752438668e-63	LACTB	Spot	up
PMAIP1	1.26593092214094e-33	1.76323	0.035	0.009	1.77002461533747e-29	PMAIP1	Spot	up
TRADD	2.64379662662007e-112	1.763	0.134	0.04	3.69655644334019e-108	TRADD	Spot	up
TGFBR1	0	1.76276	0.441	0.158	8.08915476254717e-305	TGFBR1	Spot	up
IQCK	1.65850769790776e-74	1.76152	0.089	0.026	2.31892546321464e-70	IQCK	Spot	up
NEDD9	3.36578852693988e-20	1.76152	0.023	0.007	4.70604551836734e-16	NEDD9	Spot	up
DNASE2	4.76760751575003e-231	1.76042	0.299	0.108	6.66606882852169e-227	DNASE2	Spot	up
CYB5R1	1.03681918872307e-113	1.75973	0.137	0.041	1.44968058967259e-109	CYB5R1	Spot	up
WWC3	2.89985752429617e-71	1.75538	0.088	0.026	4.0545807904709e-67	WWC3	Spot	up
ALG14	6.00418254149509e-21	1.75436	0.023	0.006	8.39504802951844e-17	ALG14	Spot	up
AVIL	6.70987521883717e-44	1.75407	0.053	0.015	9.38174753097813e-40	AVIL	Spot	up
THNSL2	3.3764328288993e-62	1.75386	0.075	0.022	4.720928381367e-58	THNSL2	Spot	up
PTPRO	6.20230811231033e-131	1.7537	0.156	0.047	8.67206720263231e-127	PTPRO	Spot	up
EFR3A	3.14699053950527e-212	1.75286	0.258	0.085	4.40012217233627e-208	EFR3A	Spot	up
PTPDC1	1.4232028343067e-42	1.75079	0.051	0.015	1.98992220292763e-38	PTPDC1	Spot	up
TRPV2	2.80092361918779e-150	1.74908	0.183	0.057	3.91625140434837e-146	TRPV2	Spot	up
ZNF888	2.14117204436834e-10	1.74902	0.011	0.003	2.99378675243582e-06	ZNF888	Spot	up
LIMD1	1.22805180723088e-258	1.74851	0.307	0.103	1.71706203687022e-254	LIMD1	Spot	up
ATP8B3	8.8529550143004e-50	1.74851	0.059	0.017	1.23782017009948e-45	ATP8B3	Spot	up
MAFB	0	1.74735	0.845	0.445	8.08915476254717e-305	MAFB	Spot	up
DUSP15	1.38403072557162e-12	1.74716	0.014	0.004	1.93515176049424e-08	DUSP15	Spot	up
TRMO	1.02972311389324e-116	1.74562	0.137	0.04	1.43975885784553e-112	TRMO	Spot	up
LANCL2	8.06104479842241e-43	1.74358	0.051	0.015	1.12709528371542e-38	LANCL2	Spot	up
LRRFIP1	2.11968434213639e-143	1.74331	0.175	0.055	2.96374264717511e-139	LRRFIP1	Spot	up
TPP1	0	1.74319	0.586	0.263	8.08915476254717e-305	TPP1	Spot	up
AGPAT2	2.15515189157171e-98	1.74272	0.12	0.036	3.01333337479557e-94	AGPAT2	Spot	up
CLHC1	2.02065724781958e-15	1.74171	0.019	0.006	2.82528296390134e-11	CLHC1	Spot	up
PYROXD2	1.31117595097344e-37	1.73993	0.044	0.012	1.83328621465107e-33	PYROXD2	Spot	up
FLT3LG	1.62750968672529e-14	1.73962	0.016	0.005	2.2755840439793e-10	FLT3LG	Spot	up
LY75	1.49679148962694e-41	1.7389	0.049	0.014	2.09281386079639e-37	LY75	Spot	up
C3orf62	6.69931056037613e-96	1.73789	0.12	0.037	9.3669760255179e-92	C3orf62	Spot	up
SORBS3	0	1.73765	0.405	0.146	8.08915476254717e-305	SORBS3	Spot	up
COMT	3.6256287248417e-177	1.73736	0.217	0.069	5.06935408307367e-173	COMT	Spot	up
MT2A	1.0107871541346e-24	1.73694	0.022	0.004	1.413282598911e-20	MT2A	Spot	up
TMEM220	1.61576010808896e-53	1.73677	0.068	0.021	2.25915578312998e-49	TMEM220	Spot	up
TTC23	5.30462885898143e-86	1.73617	0.106	0.032	7.41693207062783e-82	TTC23	Spot	up
ZNF626	2.92294860298711e-24	1.73617	0.028	0.008	4.08686673669657e-20	ZNF626	Spot	up
HEATR6	9.77098898626906e-33	1.73474	0.039	0.011	1.36617968006014e-28	HEATR6	Spot	up
LCP2	0	1.73267	0.544	0.222	8.08915476254717e-305	LCP2	Spot	up
LRRC37B	3.80319290504918e-75	1.73256	0.095	0.029	5.31762431983976e-71	LRRC37B	Spot	up
CLYBL	2.65443698665149e-54	1.73203	0.065	0.019	3.71143379473611e-50	CLYBL	Spot	up
STK32C	2.99096851086073e-80	1.73163	0.099	0.03	4.18197217188548e-76	STK32C	Spot	up
PTGR1	5.52697002104474e-75	1.73149	0.096	0.03	7.72780948342476e-71	PTGR1	Spot	up
SLC1A3	0	1.73129	0.44	0.164	8.08915476254717e-305	SLC1A3	Spot	up
RAC2	7.9838680494832e-76	1.7309	0.097	0.03	1.11630443067874e-71	RAC2	Spot	up
ATP6AP1	2.33522218491387e-251	1.73083	0.307	0.106	3.26510765894657e-247	ATP6AP1	Spot	up
ZSCAN5A	5.46665059086347e-22	1.72835	0.025	0.007	7.6434708561453e-18	ZSCAN5A	Spot	up
FOXN2	4.66315334343318e-94	1.72758	0.117	0.036	6.52002100478827e-90	FOXN2	Spot	up
ICA1L	4.74132616521988e-16	1.7255	0.018	0.005	6.62932224421043e-12	ICA1L	Spot	up
CKLF	0	1.7251	0.505	0.207	8.08915476254717e-305	CKLF	Spot	up
SH3PXD2A	2.49743156216348e-197	1.72458	0.246	0.083	3.49190881021698e-193	SH3PXD2A	Spot	up
FERMT3	0	1.72444	0.377	0.131	8.08915476254717e-305	FERMT3	Spot	up
SH2B2	1.43206984305047e-41	1.72311	0.052	0.015	2.00232005455316e-37	SH2B2	Spot	up
C2orf92	7.42215551767812e-78	1.72268	0.097	0.03	1.03776578448176e-73	C2orf92	Spot	up
CYP2E1	7.40076096878229e-09	1.72222	0.01	0.003	0.000103477	CYP2E1	Spot	up
FCHO1	5.28923353978685e-126	1.71906	0.156	0.048	7.39540633532997e-122	FCHO1	Spot	up
CERCAM	7.62819757560553e-41	1.71761	0.051	0.015	1.06657458502116e-36	CERCAM	Spot	up
NPDC1	6.04806671237733e-20	1.71474	0.024	0.007	8.45640687724598e-16	NPDC1	Spot	up
HEXB	2.2431209868157e-233	1.7144	0.308	0.115	3.13633176376571e-229	HEXB	Spot	up
MTHFD2	1.1736509206642e-126	1.71386	0.159	0.05	1.64099871727268e-122	MTHFD2	Spot	up
GAS8	2.77699581321288e-25	1.71183	0.028	0.008	3.88279554603425e-21	GAS8	Spot	up
TBX19	3.52822226579639e-29	1.71143	0.035	0.01	4.93316037203651e-25	TBX19	Spot	up
MDH1	1.93895185814585e-45	1.7114	0.056	0.017	2.71104248805952e-41	MDH1	Spot	up
TLR3	3.30272880706971e-41	1.71114	0.05	0.015	4.61787541804486e-37	TLR3	Spot	up
ACVR1B	2.25460785002669e-89	1.71053	0.113	0.035	3.15239269590731e-85	ACVR1B	Spot	up
TPCN2	1.18087732447556e-30	1.70868	0.04	0.012	1.65110267508173e-26	TPCN2	Spot	up
MVP	3.03652135333097e-60	1.70781	0.074	0.022	4.24566415622736e-56	MVP	Spot	up
LILRB4	5.53762561972926e-104	1.70772	0.128	0.039	7.74270814150545e-100	LILRB4	Spot	up
PDE6B	3.50234745738669e-130	1.70753	0.16	0.049	4.89698221491807e-126	PDE6B	Spot	up
NAALADL2	2.35225091451375e-15	1.70738	0.017	0.005	3.28891722867312e-11	NAALADL2	Spot	up
CNEP1R1	3.0367193164435e-49	1.70645	0.063	0.019	4.24594094825131e-45	CNEP1R1	Spot	up
SLC25A19	4.93597303905709e-104	1.7058	0.13	0.04	6.90147750320963e-100	SLC25A19	Spot	up
MBNL3	3.91003351345105e-62	1.70505	0.076	0.023	5.46700885850726e-58	MBNL3	Spot	up
ABCA1	0	1.70283	0.641	0.309	8.08915476254717e-305	ABCA1	Spot	up
UACA	7.99478758321e-72	1.70209	0.092	0.029	1.11783119988442e-67	UACA	Spot	up
TMEM18	2.27565870230871e-92	1.70179	0.114	0.034	3.18182599756803e-88	TMEM18	Spot	up
MOSPD1	1.44401331597204e-51	1.70121	0.063	0.018	2.01901941839211e-47	MOSPD1	Spot	up
HS2ST1	1.1405372288866e-84	1.70013	0.107	0.033	1.59469915342925e-80	HS2ST1	Spot	up
OSBPL3	7.51476822445613e-149	1.69894	0.185	0.059	1.05071489314346e-144	OSBPL3	Spot	up
ZFP28	1.83274371178269e-26	1.69805	0.033	0.01	2.56254225781456e-22	ZFP28	Spot	up
DHRS7B	2.05424981017145e-15	1.69715	0.019	0.006	2.87225208458172e-11	DHRS7B	Spot	up
ZNF229	3.08256678328707e-18	1.69699	0.019	0.005	4.31004487639198e-14	ZNF229	Spot	up
MUSTN1	5.81775076717089e-81	1.69577	0.103	0.032	8.13437912265834e-77	MUSTN1	Spot	up
ACOT13	1.44141784104751e-59	1.69473	0.075	0.023	2.01539042535263e-55	ACOT13	Spot	up
MEAK7	3.16590427817491e-50	1.6933	0.064	0.02	4.42656736174415e-46	MEAK7	Spot	up
PLEC	0	1.69272	0.495	0.197	8.08915476254717e-305	PLEC	Spot	up
TRIM25	4.4643300962683e-190	1.69272	0.243	0.083	6.24202634060234e-186	TRIM25	Spot	up
C11orf1	1.57558084973483e-32	1.69227	0.04	0.012	2.20297714409925e-28	C11orf1	Spot	up
TANK	3.38991837762801e-158	1.69193	0.199	0.064	4.73978387559949e-154	TANK	Spot	up
NFIL3	2.3272000161473e-59	1.69046	0.073	0.022	3.25389106257716e-55	NFIL3	Spot	up
PAX3	1.45532534778609e-12	1.68827	0.018	0.006	2.03483590127451e-08	PAX3	Spot	up
FNIP2	2.72536252331343e-119	1.68726	0.149	0.046	3.81060188009684e-115	FNIP2	Spot	up
OTOF	4.66928658735627e-70	1.68563	0.102	0.036	6.52859650644154e-66	OTOF	Spot	up
TTC21A	5.25144332643817e-32	1.68436	0.041	0.013	7.34256805902586e-28	TTC21A	Spot	up
KCTD10	2.21077118678262e-56	1.6817	0.074	0.023	3.09110027335946e-52	KCTD10	Spot	up
STARD9	4.05929384765825e-39	1.68148	0.048	0.014	5.67570465779576e-35	STARD9	Spot	up
CASP6	3.66714767301474e-52	1.68142	0.069	0.022	5.12740587640921e-48	CASP6	Spot	up
ZNF589	1.85856298488305e-123	1.68135	0.166	0.056	2.59864276546348e-119	ZNF589	Spot	up
TBKBP1	1.00766558518988e-104	1.68008	0.133	0.042	1.40891802121249e-100	TBKBP1	Spot	up
PKIB	6.28826199584074e-106	1.67923	0.135	0.043	8.79224792258452e-102	PKIB	Spot	up
SPG21	1.1556221728631e-278	1.67861	0.345	0.124	1.61579092209719e-274	SPG21	Spot	up
EID3	7.59201110654419e-62	1.67805	0.078	0.024	1.06151499291701e-57	EID3	Spot	up
ZC4H2	1.30262536997943e-13	1.6773	0.015	0.004	1.82133079230524e-09	ZC4H2	Spot	up
PTCRA	7.6528861180567e-35	1.67677	0.042	0.012	1.07002653702669e-30	PTCRA	Spot	up
SRSF8	4.12533725895213e-86	1.67667	0.109	0.034	5.76804655546687e-82	SRSF8	Spot	up
GHITM	1.50522890239201e-92	1.67643	0.118	0.037	2.10461105132451e-88	GHITM	Spot	up
FAM177A1	5.01539266306541e-63	1.67635	0.081	0.025	7.01252202149805e-59	FAM177A1	Spot	up
ADPRH	3.88711728417905e-79	1.67585	0.1	0.031	5.43496738673915e-75	ADPRH	Spot	up
TDP2	2.85869880827093e-78	1.67415	0.1	0.031	3.99703267372441e-74	TDP2	Spot	up
SEPTIN1	3.31602203543465e-10	1.67362	0.011	0.003	4.63646200994473e-06	SEPTIN1	Spot	up
DTWD2	2.76301376728842e-22	1.67057	0.028	0.008	3.86324584942267e-18	DTWD2	Spot	up
SCART1	5.11072331693004e-29	1.67001	0.035	0.011	7.14581334173159e-25	SCART1	Spot	up
POMP	8.48998798641724e-42	1.66953	0.052	0.016	1.18707012026086e-37	POMP	Spot	up
NBPF1	5.95523774465711e-46	1.66686	0.06	0.019	8.32661341457957e-42	NBPF1	Spot	up
KCTD21	8.77357637497271e-17	1.66624	0.022	0.007	1.22672144874868e-12	KCTD21	Spot	up
GLA	4.89547154802128e-40	1.66595	0.05	0.015	6.84484831844335e-36	GLA	Spot	up
PSMB3	1.73676630062303e-18	1.6659	0.022	0.007	2.42834664153112e-14	PSMB3	Spot	up
NOTCH2	3.79759757627845e-85	1.66557	0.113	0.037	5.30980093115253e-81	NOTCH2	Spot	up
STOM	1.63916084597837e-173	1.66384	0.225	0.077	2.29187469484695e-169	STOM	Spot	up
TSEN34	3.88914399415003e-20	1.66274	0.025	0.008	5.43780113262057e-16	TSEN34	Spot	up
MYO1G	3.75277414548942e-155	1.66216	0.163	0.042	5.24712881022331e-151	MYO1G	Spot	up
LPIN1	2.83976426515378e-67	1.6616	0.088	0.028	3.97055839553802e-63	LPIN1	Spot	up
XRRA1	9.67245732642743e-44	1.66113	0.055	0.016	1.35240298338108e-39	XRRA1	Spot	up
PTK2B	1.05745224070408e-225	1.66065	0.288	0.101	1.47852972295244e-221	PTK2B	Spot	up
CD300LB	3.26198095637907e-18	1.66053	0.023	0.007	4.56090177320922e-14	CD300LB	Spot	up
IGSF6	5.54910717431937e-154	1.66021	0.202	0.068	7.75876165113335e-150	IGSF6	Spot	up
GCH1	8.78580547443675e-19	1.65927	0.022	0.007	1.22843132143575e-14	GCH1	Spot	up
RPP25	7.96675623982423e-60	1.65921	0.077	0.024	1.11391185745222e-55	RPP25	Spot	up
COLQ	1.14155678739182e-17	1.6579	0.021	0.007	1.59612470013125e-13	COLQ	Spot	up
PSME2	9.15618645888078e-35	1.65702	0.046	0.015	1.28021799068071e-30	PSME2	Spot	up
TESK2	1.60342398710557e-40	1.65691	0.052	0.016	2.24190741877101e-36	TESK2	Spot	up
AGTRAP	1.09027221361998e-97	1.65683	0.127	0.041	1.52441860908346e-93	AGTRAP	Spot	up
INCA1	2.65370127352421e-09	1.65585	0.01	0.003	3.71040512064155e-05	INCA1	Spot	up
INSIG1	4.33319657217776e-36	1.6556	0.044	0.013	6.05867544721895e-32	INSIG1	Spot	up
NDUFB9	6.12733464745203e-77	1.65524	0.102	0.033	8.56723930406742e-73	NDUFB9	Spot	up
OAT	1.79053316158078e-13	1.6551	0.015	0.004	2.50352346652225e-09	OAT	Spot	up
GATA3	2.83253907199757e-15	1.654	0.019	0.006	3.960456130467e-11	GATA3	Spot	up
RNF13	4.48004374880229e-114	1.65277	0.15	0.049	6.26399716957536e-110	RNF13	Spot	up
PRADC1	6.46796483231714e-36	1.6508	0.047	0.015	9.04350842854582e-32	PRADC1	Spot	up
SPIRE2	4.77504135841691e-37	1.64901	0.049	0.015	6.67646282733853e-33	SPIRE2	Spot	up
COPRS	4.19381213477698e-74	1.64802	0.1	0.033	5.86378812684518e-70	COPRS	Spot	up
POLR2L	5.68454342851997e-90	1.64784	0.121	0.04	7.94812862175662e-86	POLR2L	Spot	up
CHST15	1.558269586015e-136	1.64699	0.176	0.057	2.17877253516617e-132	CHST15	Spot	up
GRK4	3.22972243844744e-31	1.64461	0.041	0.013	4.51579791343721e-27	GRK4	Spot	up
SLC18B1	1.60449115148269e-75	1.64373	0.098	0.031	2.24339952800309e-71	SLC18B1	Spot	up
CLN8	5.32268591535746e-182	1.64328	0.237	0.081	7.4421794468528e-178	CLN8	Spot	up
HINT1	1.59836289718334e-47	1.64318	0.063	0.02	2.23483100284174e-43	HINT1	Spot	up
NME2	4.6903293430018e-92	1.64054	0.12	0.039	6.55801848738512e-88	NME2	Spot	up
PDLIM5	2.91132647609716e-23	1.63991	0.03	0.009	4.07061667887905e-19	PDLIM5	Spot	up
COPZ2	2.12204591055548e-15	1.63936	0.02	0.006	2.96704459213867e-11	COPZ2	Spot	up
ICAM1	2.84741784727307e-144	1.63843	0.173	0.052	3.9812596340572e-140	ICAM1	Spot	up
CXCL8	3.56026250463979e-60	1.63808	0.062	0.015	4.97795903398735e-56	CXCL8	Spot	up
DALRD3	3.85777782648414e-31	1.63713	0.042	0.014	5.39394495699013e-27	DALRD3	Spot	up
ARID5B	8.45284317282192e-158	1.637	0.204	0.067	1.18187653242396e-153	ARID5B	Spot	up
TKT	6.22177213575052e-93	1.63648	0.123	0.04	8.69928180020638e-89	TKT	Spot	up
OSBPL1A	3.04094662965139e-71	1.6315	0.098	0.032	4.25185157757857e-67	OSBPL1A	Spot	up
SLC30A4	3.28882658256717e-36	1.62977	0.048	0.016	4.59843732774542e-32	SLC30A4	Spot	up
RIT1	6.28891855507133e-80	1.62599	0.11	0.037	8.79316592370073e-76	RIT1	Spot	up
ZNF43	1.73159336996036e-12	1.62553	0.015	0.005	2.42111384987858e-08	ZNF43	Spot	up
PRG2	7.63558924331713e-15	1.62414	0.015	0.004	1.0676080880006e-10	PRG2	Spot	up
COA6	1.14907473874831e-52	1.62314	0.07	0.022	1.60663629971788e-48	COA6	Spot	up
TPRA1	1.44291908995921e-140	1.62278	0.192	0.066	2.01748947158097e-136	TPRA1	Spot	up
ENTPD5	2.31754288795273e-40	1.62249	0.055	0.018	3.24038846593551e-36	ENTPD5	Spot	up
HEG1	2.29130672178162e-42	1.62209	0.054	0.017	3.20370505839506e-38	HEG1	Spot	up
UNC5CL	2.2990056526453e-14	1.62204	0.017	0.005	3.21446970352866e-10	UNC5CL	Spot	up
TPM4	2.18507678480428e-54	1.62106	0.073	0.024	3.05517436051335e-50	TPM4	Spot	up
SETD7	4.08250837395698e-80	1.62037	0.108	0.035	5.70816320846665e-76	SETD7	Spot	up
NEIL2	2.99715073043064e-44	1.62027	0.059	0.019	4.19061615128812e-40	NEIL2	Spot	up
SLC9A1	1.12688336058963e-43	1.62018	0.059	0.019	1.57560831477642e-39	SLC9A1	Spot	up
ERN1	2.16918168390708e-120	1.61988	0.161	0.054	3.03294983043888e-116	ERN1	Spot	up
GPRIN3	1.15698353022731e-125	1.61899	0.172	0.059	1.61769437196382e-121	GPRIN3	Spot	up
ZKSCAN3	4.40647677055274e-37	1.61835	0.05	0.016	6.16113582058683e-33	ZKSCAN3	Spot	up
TEC	8.42149840359935e-49	1.61825	0.064	0.02	1.17749390679126e-44	TEC	Spot	up
BATF	1.85630033653214e-50	1.61788	0.07	0.023	2.59547913053924e-46	BATF	Spot	up
HK1	7.22359544718479e-188	1.61717	0.249	0.088	1.01000311542538e-183	HK1	Spot	up
TMCO4	2.75852907089236e-55	1.61665	0.074	0.024	3.85697534692169e-51	TMCO4	Spot	up
TAF1B	1.930326824416e-28	1.61601	0.038	0.012	2.69898296589846e-24	TAF1B	Spot	up
MPND	3.87668625122505e-72	1.61232	0.1	0.034	5.42038271646287e-68	MPND	Spot	up
FAM83H	7.19849822137633e-31	1.61232	0.042	0.014	1.00649402131284e-26	FAM83H	Spot	up
ZNF354C	5.97949757389694e-22	1.61232	0.029	0.01	8.36053350782271e-18	ZNF354C	Spot	up
ZYX	2.57082039917029e-279	1.61169	0.364	0.138	3.5945210821199e-275	ZYX	Spot	up
COA7	7.6265286487049e-29	1.61136	0.039	0.013	1.06634123566192e-24	COA7	Spot	up
SCIMP	1.43390211779522e-135	1.61105	0.183	0.062	2.00488194110128e-131	SCIMP	Spot	up
ITPRIPL1	5.38857445233445e-33	1.60949	0.045	0.014	7.53430479925402e-29	ITPRIPL1	Spot	up
AC091057.6	9.5787894159725e-13	1.6092	0.016	0.005	1.33930633614128e-08	AC091057.6	Spot	up
LINS1	1.19300368630863e-86	1.60884	0.119	0.04	1.66805775419673e-82	LINS1	Spot	up
NSMAF	3.04403112982847e-88	1.60872	0.118	0.039	4.25616432572617e-84	NSMAF	Spot	up
TMEM154	1.87152625012241e-35	1.60692	0.048	0.016	2.61676800292115e-31	TMEM154	Spot	up
PDE4B	5.51370562788687e-96	1.60682	0.127	0.041	7.70926320891143e-92	PDE4B	Spot	up
CCDC191	1.62815703502922e-36	1.60635	0.05	0.016	2.27648916637785e-32	CCDC191	Spot	up
DGLUCY	1.21627363219928e-176	1.60552	0.242	0.087	1.70059379254103e-172	DGLUCY	Spot	up
PLEKHO2	0	1.60381	0.511	0.226	8.08915476254717e-305	PLEKHO2	Spot	up
MGAT1	0	1.6036	0.427	0.181	8.08915476254717e-305	MGAT1	Spot	up
IDS	1.71704068158068e-192	1.60312	0.266	0.098	2.40076628098611e-188	IDS	Spot	up
HAMP	7.9830165491065e-23	1.60143	0.026	0.007	1.11618537389607e-18	HAMP	Spot	up
HDAC4	1.2364056435838e-38	1.60046	0.055	0.018	1.72874237085886e-34	HDAC4	Spot	up
RAB11FIP1	1.69430126595967e-105	1.6004	0.151	0.053	2.36897203006481e-101	RAB11FIP1	Spot	up
EHHADH	1.23866754893701e-20	1.59927	0.025	0.008	1.73190496692372e-16	EHHADH	Spot	up
PLEKHF1	2.06635171658628e-10	1.59927	0.013	0.004	2.88917297013093e-06	PLEKHF1	Spot	up
TTC30A	7.46029540815684e-09	1.59807	0.01	0.003	0.00010431	TTC30A	Spot	up
GPR180	7.63007346050715e-39	1.59751	0.052	0.016	1.06683687124811e-34	GPR180	Spot	up
NT5C3A	1.08129599415607e-52	1.59748	0.073	0.024	1.51186805902902e-48	NT5C3A	Spot	up
CDC26	7.23232878953563e-19	1.59685	0.024	0.008	1.01122421135287e-14	CDC26	Spot	up
SLC12A8	2.77219076399672e-11	1.59685	0.012	0.003	3.87607712622021e-07	SLC12A8	Spot	up
ZNF396	2.37850021210035e-16	1.59664	0.021	0.007	3.32561899655871e-12	ZNF396	Spot	up
CALHM2	1.24680530704525e-131	1.59622	0.178	0.06	1.74328318031067e-127	CALHM2	Spot	up
CD81	1.44898292736985e-167	1.59587	0.251	0.098	2.02596792904852e-163	CD81	Spot	up
ARHGAP15	0	1.59389	0.543	0.227	8.08915476254717e-305	ARHGAP15	Spot	up
PEPD	1.0789078012387e-111	1.59296	0.151	0.05	1.50852888769195e-107	PEPD	Spot	up
ARAP2	1.87610617452075e-48	1.59198	0.069	0.023	2.62317165321491e-44	ARAP2	Spot	up
ATG7	0	1.59168	0.459	0.191	8.08915476254717e-305	ATG7	Spot	up
IDNK	1.55204919838958e-41	1.59168	0.055	0.017	2.1700751891883e-37	IDNK	Spot	up
CCDC15	1.24182137249403e-09	1.59159	0.012	0.004	1.73631464302116e-05	CCDC15	Spot	up
TPMT	8.79265070362021e-22	1.59097	0.029	0.009	1.22938842138018e-17	TPMT	Spot	up
DUSP2	1.37737910095169e-27	1.59086	0.03	0.008	1.92585145895065e-23	DUSP2	Spot	up
PIP4K2C	2.60423891208503e-66	1.59009	0.093	0.032	3.64124684687729e-62	PIP4K2C	Spot	up
FAM8A1	1.95988315493974e-22	1.58987	0.029	0.009	2.74030862723674e-18	FAM8A1	Spot	up
RAB3IP	6.72337974580239e-24	1.58769	0.031	0.01	9.4006295605809e-20	RAB3IP	Spot	up
OAS1	4.02574212641786e-254	1.58672	0.388	0.172	5.62879264115745e-250	OAS1	Spot	up
MTHFD1	7.40998969530598e-93	1.58628	0.125	0.041	1.03606475919768e-88	MTHFD1	Spot	up
TLCD2	2.46437299965109e-21	1.58266	0.027	0.008	3.44568632811216e-17	TLCD2	Spot	up
CTU2	1.66050478866418e-48	1.58219	0.068	0.023	2.32171779551025e-44	CTU2	Spot	up
CCDC180	3.99656132275591e-40	1.58115	0.055	0.018	5.58799204147732e-36	CCDC180	Spot	up
TRAF5	8.53325484135926e-58	1.58107	0.078	0.025	1.19311969191885e-53	TRAF5	Spot	up
TLE3	1.04786364685323e-62	1.57766	0.084	0.027	1.46512295103018e-58	TLE3	Spot	up
BTBD8	1.22473221668702e-49	1.5775	0.068	0.022	1.71242058537179e-45	BTBD8	Spot	up
TRIM21	5.12943824636607e-113	1.57734	0.16	0.056	7.17198055606904e-109	TRIM21	Spot	up
PJA1	3.3030822240725e-34	1.57724	0.046	0.015	4.61836956569817e-30	PJA1	Spot	up
SOD1	4.9922644403332e-46	1.57668	0.064	0.021	6.98018414047389e-42	SOD1	Spot	up
SNRPD2	2.12768704364842e-28	1.5758	0.038	0.012	2.97493202442922e-24	SNRPD2	Spot	up
SETDB2	4.61914246404022e-166	1.57288	0.24	0.09	6.45848499322104e-162	SETDB2	Spot	up
CCPG1	1.07631686647699e-150	1.57213	0.214	0.077	1.50490624270812e-146	CCPG1	Spot	up
SELL	3.21357135733074e-32	1.57086	0.045	0.015	4.49321547181983e-28	SELL	Spot	up
DOK3	3.82505483681962e-175	1.56999	0.26	0.101	5.34819167284119e-171	DOK3	Spot	up
PLXND1	0	1.56989	0.666	0.328	8.08915476254717e-305	PLXND1	Spot	up
TNFRSF10A	5.94725946873773e-35	1.56981	0.046	0.015	8.3154581891891e-31	TNFRSF10A	Spot	up
MFSD13A	4.08379254549835e-85	1.56963	0.123	0.043	5.70995873711579e-81	MFSD13A	Spot	up
GADD45B	3.30426112663493e-24	1.56922	0.031	0.01	4.62001790726095e-20	GADD45B	Spot	up
UBXN2A	3.41500807104005e-36	1.56897	0.051	0.017	4.7748642849282e-32	UBXN2A	Spot	up
TMEM150B	1.93344168120152e-37	1.56823	0.052	0.017	2.70333815865597e-33	TMEM150B	Spot	up
CCNYL1	1.09712701835795e-148	1.56817	0.21	0.075	1.53400299706808e-144	CCNYL1	Spot	up
NIPAL2	2.76449945920973e-28	1.56798	0.038	0.013	3.86532314386705e-24	NIPAL2	Spot	up
CENPN	1.32317248244534e-22	1.56553	0.029	0.009	1.85005976495507e-18	CENPN	Spot	up
NDST1	2.06961835208463e-50	1.56496	0.072	0.024	2.89374037988473e-46	NDST1	Spot	up
ZNF671	5.91150440384224e-76	1.56421	0.107	0.036	8.26546545745221e-72	ZNF671	Spot	up
FGD6	7.50636426454612e-45	1.56401	0.064	0.021	1.04953985146884e-40	FGD6	Spot	up
PDCD1LG2	2.18562866668635e-23	1.56274	0.03	0.009	3.05594600176085e-19	PDCD1LG2	Spot	up
C10orf143	3.1130637893366e-23	1.56274	0.031	0.01	4.35268579025044e-19	C10orf143	Spot	up
ZC3H12D	7.74326215407293e-73	1.56233	0.097	0.031	1.08266291438248e-68	ZC3H12D	Spot	up
DCTPP1	1.63662916625642e-32	1.56182	0.044	0.014	2.28833490025973e-28	DCTPP1	Spot	up
ZCRB1	1.10114691372288e-110	1.56147	0.151	0.051	1.53962361476732e-106	ZCRB1	Spot	up
SCPEP1	6.38627516198738e-211	1.56069	0.298	0.114	8.92928993149075e-207	SCPEP1	Spot	up
LXN	6.48256589819802e-25	1.56026	0.033	0.011	9.06392363886047e-21	LXN	Spot	up
RRAGC	3.1759345480635e-44	1.56017	0.063	0.021	4.44059168510238e-40	RRAGC	Spot	up
CRYZ	7.24928533501005e-52	1.5574	0.075	0.026	1.0135950755411e-47	CRYZ	Spot	up
ABCA3	1.27583433091852e-13	1.5553	0.017	0.005	1.78387156149027e-09	ABCA3	Spot	up
VRK2	6.12399849434959e-93	1.55457	0.135	0.048	8.56257469479959e-89	VRK2	Spot	up
CHRAC1	1.10821529819668e-37	1.55418	0.052	0.017	1.54950662993859e-33	CHRAC1	Spot	up
DYNLT3	7.08522012453139e-29	1.55292	0.041	0.014	9.90655477811979e-25	DYNLT3	Spot	up
SLC35F6	4.77999367357663e-169	1.55131	0.236	0.085	6.68338715439484e-165	SLC35F6	Spot	up
AKT1S1	2.49725621964426e-110	1.5507	0.173	0.066	3.4916636463066e-106	AKT1S1	Spot	up
COMMD9	2.97887333036673e-91	1.55045	0.131	0.045	4.16506069051876e-87	COMMD9	Spot	up
CD47	5.9755247047443e-117	1.54876	0.165	0.058	8.35497864217348e-113	CD47	Spot	up
ADGRE1	1.17981184234689e-32	1.54872	0.042	0.013	1.64961291796942e-28	ADGRE1	Spot	up
PXDC1	2.73969503507228e-105	1.5487	0.154	0.055	3.83064159803807e-101	PXDC1	Spot	up
TOR1B	5.69297108300279e-64	1.54781	0.091	0.031	7.95991216825451e-60	TOR1B	Spot	up
SIGLEC12	1.43234141243909e-31	1.54592	0.045	0.015	2.00269976287234e-27	SIGLEC12	Spot	up
SLC41A2	1.19893971867604e-28	1.54572	0.038	0.012	1.67635751465284e-24	SLC41A2	Spot	up
TMBIM6	9.47350977651773e-23	1.54318	0.033	0.011	1.32458613695271e-18	TMBIM6	Spot	up
GPI	6.12533833060929e-58	1.54276	0.082	0.028	8.56444805385791e-54	GPI	Spot	up
LILRB5	1.48730126135361e-199	1.5423	0.219	0.062	2.07954462362462e-195	LILRB5	Spot	up
ABHD6	4.5602650407854e-50	1.54224	0.07	0.024	6.37616258002614e-46	ABHD6	Spot	up
TXLNB	3.2762862334174e-11	1.54071	0.015	0.005	4.5809034115642e-07	TXLNB	Spot	up
SLC66A3	1.22770922461464e-63	1.54026	0.088	0.029	1.71658303785619e-59	SLC66A3	Spot	up
SLC45A4	7.0299990768779e-37	1.53904	0.053	0.018	9.82934470929068e-33	SLC45A4	Spot	up
RABL3	1.27890079519722e-35	1.53884	0.051	0.017	1.78815909184476e-31	RABL3	Spot	up
JADE2	2.98892444011553e-74	1.53613	0.111	0.039	4.17911415216954e-70	JADE2	Spot	up
MECR	9.14928187251939e-34	1.53558	0.047	0.016	1.27925259141566e-29	MECR	Spot	up
DOCK5	0	1.53545	0.44	0.173	8.08915476254717e-305	DOCK5	Spot	up
PGD	2.05373139081566e-132	1.53447	0.194	0.071	2.87152723063846e-128	PGD	Spot	up
PVR	9.03696889363796e-34	1.53424	0.049	0.017	1.26354899070846e-29	PVR	Spot	up
SLC15A3	0	1.53404	0.55	0.276	8.08915476254717e-305	SLC15A3	Spot	up
ABCA2	1.54495112013489e-52	1.53394	0.076	0.026	2.16015065617261e-48	ABCA2	Spot	up
UBB	2.79973441502089e-29	1.53361	0.042	0.014	3.91458865908221e-25	UBB	Spot	up
CFAP70	6.27146680556333e-14	1.53355	0.018	0.006	8.76876488753865e-10	CFAP70	Spot	up
ANKDD1A	4.08895471566138e-47	1.53304	0.069	0.024	5.71717648343774e-43	ANKDD1A	Spot	up
CCER2	6.47256866284803e-13	1.53282	0.018	0.006	9.04994550439412e-09	CCER2	Spot	up
CAPN3	5.24566172150542e-160	1.53234	0.23	0.085	7.33448421900887e-156	CAPN3	Spot	up
MARVELD3	2.20342189048898e-14	1.53215	0.02	0.007	3.08082448728169e-10	MARVELD3	Spot	up
ST13	2.88131299215347e-35	1.53189	0.049	0.016	4.02865182562898e-31	ST13	Spot	up
LRP11	1.78025112484562e-31	1.52934	0.044	0.015	2.48914712275915e-27	LRP11	Spot	up
CCT6B	2.23790151631354e-14	1.52907	0.02	0.007	3.12903390010959e-10	CCT6B	Spot	up
COX8A	3.86591373180778e-74	1.52894	0.108	0.038	5.40532057981363e-70	COX8A	Spot	up
SERPINF2	6.52452150090972e-43	1.52891	0.061	0.021	9.12258596257197e-39	SERPINF2	Spot	up
SPATS2	1.46885730184089e-69	1.52875	0.098	0.033	2.05375627943393e-65	SPATS2	Spot	up
RSU1	1.46049311176533e-104	1.52812	0.151	0.053	2.04206146887029e-100	RSU1	Spot	up
ANKRD37	3.51123617848684e-38	1.52811	0.055	0.019	4.9094104247603e-34	ANKRD37	Spot	up
TMEM88	3.23335329888898e-10	1.52781	0.012	0.003	4.52087458250657e-06	TMEM88	Spot	up
TEDC1	7.0101882484333e-28	1.52671	0.039	0.013	9.80164520895944e-24	TEDC1	Spot	up
POR	1.12429371517958e-62	1.52652	0.091	0.032	1.57198747256409e-58	POR	Spot	up
GPR84	2.49434101669726e-71	1.52619	0.103	0.036	3.48758760954611e-67	GPR84	Spot	up
MFSD5	3.96447943776918e-13	1.52477	0.017	0.006	5.54313514988886e-09	MFSD5	Spot	up
CPNE8	1.11569158049788e-78	1.52257	0.113	0.039	1.55995996785214e-74	CPNE8	Spot	up
ZNF334	1.30488833552e-20	1.52226	0.028	0.009	1.82449487072406e-16	ZNF334	Spot	up
C17orf58	1.25711323856023e-11	1.52162	0.016	0.006	1.75769573015492e-07	C17orf58	Spot	up
B3GNT2	3.13198609354523e-144	1.52121	0.231	0.093	4.37914295599494e-140	B3GNT2	Spot	up
RNF227	5.29980935079773e-43	1.51921	0.062	0.021	7.41019343428539e-39	RNF227	Spot	up
ARL6IP1	1.6730185447229e-33	1.51835	0.049	0.017	2.33921452923157e-29	ARL6IP1	Spot	up
UBXN8	5.2998907604799e-18	1.51835	0.025	0.008	7.410307261303e-14	UBXN8	Spot	up
BAG1	4.63655794729684e-266	1.51639	0.378	0.154	6.48283532191045e-262	BAG1	Spot	up
SIAE	1.71017820615312e-19	1.51625	0.026	0.009	2.3911711678433e-15	SIAE	Spot	up
DHRSX	8.81380315233457e-104	1.516	0.152	0.054	1.23234595675942e-99	DHRSX	Spot	up
MTMR6	6.37472760826412e-66	1.5145	0.096	0.033	8.9131441418749e-62	MTMR6	Spot	up
GRK6	9.02074576398559e-73	1.51405	0.108	0.038	1.26128067272047e-68	GRK6	Spot	up
POMGNT2	6.81610551599672e-09	1.51359	0.011	0.004	9.53027873246661e-05	POMGNT2	Spot	up
CAMLG	2.45795911716783e-58	1.51276	0.085	0.03	3.43671843762406e-54	CAMLG	Spot	up
TCTN2	2.92262703913044e-14	1.51242	0.018	0.006	4.08641712611218e-10	TCTN2	Spot	up
SPART	2.48293337780163e-89	1.5124	0.131	0.046	3.47163744884224e-85	SPART	Spot	up
DSTN	3.39376683459381e-19	1.51232	0.027	0.009	4.74516478812906e-15	DSTN	Spot	up
WIPF1	0	1.51231	0.507	0.227	8.08915476254717e-305	WIPF1	Spot	up
RNLS	1.49345783396628e-26	1.51139	0.039	0.013	2.08815274345166e-22	RNLS	Spot	up
YWHAB	2.27192974619715e-37	1.51035	0.054	0.019	3.17661217113285e-33	YWHAB	Spot	up
ETV5	0	1.51032	0.466	0.199	8.08915476254717e-305	ETV5	Spot	up
ZNF672	6.36030348075098e-52	1.50733	0.077	0.027	8.89297632678602e-48	ZNF672	Spot	up
LAGE3	3.31194812371823e-22	1.5065	0.032	0.011	4.63076586658284e-18	LAGE3	Spot	up
[truncated: 10,319 more rows]
