# Supplementary material for: Brain wide engraftment of human monocytes induces neurodegeneration and cognitive dysfunction
Source: Research Square preprint supplement (doi:10.21203/rs.3.rs-7762816/v1), 2025-10-10
Supplement: Supplementary file 3 [file cc0531187fe6e71ab9f9ac32.xlsx]

## Sheet: enrichment_upreg_protein_KEGG_9
Enrichment FDR	nGenes	Pathway Genes	Fold Enrichment	Pathway	URL	Genes
2.57791908083205e-12	20	76	9.73057	Path:hsa05140 Leishmaniasis	https://www.genome.jp/kegg-bin/show_pathway?hsa05140	MAPK14 CYBA CYBB EEF1A1 FCGR2A HLA-DMA HLA-DMB HLA-DPA1 HLA-DPB1 HLA-DRA HLA-DRB1 ITGB1 ITGB2 JAK1 NCF2 NCF4 NFKB1 PTPN6 RELA STAT1
9.98500878742616e-11	26	170	5.65518	Path:hsa04141 Protein processing in endoplasmic reticulum	https://www.genome.jp/kegg-bin/show_pathway?hsa04141	PDIA6 BCAP31 ERP29 SEC63 DAD1 DDOST GANAB PDIA3 SEC61A1 ERO1A STT3A LMAN1 P4HB UGGT2 PRKCSH UGGT1 OSTC RPN1 RPN2 RRBP1 SSR1 SSR4 MOGS CAPN1 MAGT1 PDIA4
9.98500878742616e-11	26	171	5.62211	Path:hsa05164 Influenza A	https://www.genome.jp/kegg-bin/show_pathway?hsa05164	CPSF4 EP300 RIGI PYCARD HLA-DMA HLA-DMB HLA-DPA1 HLA-DPB1 HLA-DRA HLA-DRB1 IL18 IRF3 JAK1 MX1 NFKB1 OAS2 OAS3 PIK3R1 EIF2AK2 RELA IFIH1 STAT1 TRIM25 CASP1 CASP3 IL33
2.20625803583815e-10	26	179	5.37084	Path:hsa05152 Tuberculosis	https://www.genome.jp/kegg-bin/show_pathway?hsa05152	CREB1 MAPK14 CTSD CTSS EP300 FCER1G FCGR2A HLA-DMA HLA-DMB HLA-DPA1 HLA-DPB1 HLA-DRA HLA-DRB1 IL18 ITGAX ITGB2 JAK1 LAMP1 LAMP2 LSP1 NFKB1 RELA STAT1 CASP3 CD14 CD74
4.97668391738489e-10	27	202	4.94236	Path:hsa05169 Epstein-Barr virus infection	https://www.genome.jp/kegg-bin/show_pathway?hsa05169	MAPK14 RIGI PDIA3 HLA-A HLA-B HLA-DMA HLA-DMB HLA-DPA1 HLA-DPB1 HLA-DRA HLA-DRB1 IRF3 JAK1 NFKB1 NFKB2 OAS2 OAS3 PIK3R1 EIF2AK2 B2M RELA STAT1 STAT3 TAP2 VIM CASP3 CD44
1.13320740917391e-09	23	152	5.59508	Path:hsa04145 Phagosome	https://www.genome.jp/kegg-bin/show_pathway?hsa04145	CTSS CYBA CYBB FCGR2A SEC61A1 HLA-A HLA-B HLA-DMA HLA-DMB HLA-DPA1 HLA-DPB1 HLA-DRA HLA-DRB1 ITGA5 ITGB1 ITGB2 LAMP1 LAMP2 MSR1 NCF2 NCF4 TAP2 CD14
1.59220180586262e-09	17	80	7.85743	Path:hsa04612 Antigen processing and presentation	https://www.genome.jp/kegg-bin/show_pathway?hsa04612	IFI30 CREB1 CTSS PDIA3 HLA-A HLA-B HLA-DMA HLA-DMB HLA-DPA1 HLA-DPB1 HLA-DRA HLA-DRB1 B2M PSME1 PSME2 TAP2 CD4
5.34286847931648e-09	24	181	4.90292	Path:hsa05168 Herpes simplex virus 1 infection	https://www.genome.jp/kegg-bin/show_pathway?hsa05168	RIGI PDIA3 HLA-A HLA-B HLA-DMA HLA-DMB HLA-DPA1 HLA-DPB1 HLA-DRA HLA-DRB1 IRF3 ITGA5 JAK1 NFKB1 OAS2 OAS3 PIK3R1 EIF2AK2 B2M RELA IFIH1 STAT1 TAP2 CASP3
5.41227743328997e-09	28	246	4.20867	Path:hsa05131 Shigellosis	https://www.genome.jp/kegg-bin/show_pathway?hsa05131	ARPC5 ARPC1B MAPK14 DOCK1 PYCARD HCLS1 IL18 ILK IRF3 ITGA5 ITGB1 SEPTIN2 NFKB1 PFN1 PIK3R1 PLCB3 PXN RELA VCL ACTN4 CAPN1 CAPNS1 CAST CASP1 PLCD4 ACTN1 CD14 CD44
7.98687633129521e-09	19	115	6.1091	Path:hsa04670 Leukocyte transendothelial migration	https://www.genome.jp/kegg-bin/show_pathway?hsa04670	MAPK14 CYBA CYBB ITGB1 ITGB2 CD99 MSN NCF2 NCF4 F11R PIK3R1 PXN VASP VAV1 VCAM1 VCL EZR ACTN4 ACTN1
1.04119813040414e-08	17	92	6.83255	Path:hsa04658 Th1 and Th2 cell differentiation	https://www.genome.jp/kegg-bin/show_pathway?hsa04658	MAPK14 HLA-DMA HLA-DMB HLA-DPA1 HLA-DPB1 HLA-DRA HLA-DRB1 JAK1 NFATC1 NFKB1 NOTCH3 RELA STAT1 STAT5A STAT5B STAT6 CD4
1.45011875808726e-08	18	107	6.22029	Path:hsa04659 Th17 cell differentiation	https://www.genome.jp/kegg-bin/show_pathway?hsa04659	MAPK14 HLA-DMA HLA-DMB HLA-DPA1 HLA-DPB1 HLA-DRA HLA-DRB1 IL1RAP JAK1 NFATC1 NFKB1 RELA STAT1 STAT3 STAT5A STAT5B STAT6 CD4
2.2000905835375e-08	26	232	4.14388	Path:hsa04820 Cytoskeleton in muscle cells	https://www.genome.jp/kegg-bin/show_pathway?hsa04820	PDLIM5 FMNL2 COL6A1 COL6A2 COL6A3 DES FBLN1 FBN1 FLNC SUN2 AMPD3 TMOD3 ITGA6 ITGA5 ITGA7 ITGB1 LAMA2 LMNA MYH9 NID1 PLEC SNTA1 VCL VIM PDLIM4 FMNL3
2.2000905835375e-08	20	138	5.35886	Path:hsa05135 Yersinia infection	https://www.genome.jp/kegg-bin/show_pathway?hsa05135	ARPC5 ARPC1B MAPK14 DOCK1 FCGR2A PYCARD IL18 IRF3 ITGA5 ITGB1 LCP2 NFATC1 NFKB1 PIK3R1 PXN RELA VAV1 WAS CASP1 CD4
3.83083010672054e-08	15	77	7.20315	Path:hsa05133 Pertussis	https://www.genome.jp/kegg-bin/show_pathway?hsa05133	MAPK14 PYCARD IRF3 ITGA5 ITGB1 ITGB2 NFKB1 RELA C1QA C1QB C1QC C4B CASP1 CASP3 CASP7
9.15388576412782e-08	24	215	4.12757	Path:hsa05417 Lipid and atherosclerosis	https://www.genome.jp/kegg-bin/show_pathway?hsa05417	MAPK14 CYBA CYBB ABCA1 PYCARD ERO1A IL18 IRF3 NCF2 NCF4 NFATC1 NFKB1 PIK3R1 PLCB3 RELA SOD2 STAT3 VAV1 VCAM1 CASP1 CASP3 CASP6 CASP7 CD14
1.23060508693408e-07	23	202	4.21016	Path:hsa04510 Focal adhesion	https://www.genome.jp/kegg-bin/show_pathway?hsa04510	COL6A1 COL6A2 COL6A3 DOCK1 FLNA FLNB PARVB HGF ILK ITGA6 ITGA5 ITGA7 ITGB1 LAMA2 PIK3R1 PARVA PXN PARVG VASP VAV1 VCL ACTN4 ACTN1
1.27760443867506e-07	17	111	5.66301	Path:hsa05145 Toxoplasmosis	https://www.genome.jp/kegg-bin/show_pathway?hsa05145	MAPK14 ALOX5 HLA-DMA HLA-DMB HLA-DPA1 HLA-DPB1 HLA-DRA HLA-DRB1 ITGA6 ITGB1 JAK1 LAMA2 NFKB1 RELA STAT1 STAT3 CASP3
2.60200521779015e-07	13	65	7.39523	Path:hsa05321 Inflammatory bowel disease	https://www.genome.jp/kegg-bin/show_pathway?hsa05321	HLA-DMA HLA-DMB HLA-DPA1 HLA-DPB1 HLA-DRA HLA-DRB1 IL18 NFATC1 NFKB1 RELA STAT1 STAT3 STAT6
3.0119767103281e-07	24	231	3.84168	Path:hsa04810 Regulation of actin cytoskeleton	https://www.genome.jp/kegg-bin/show_pathway?hsa04810	ARPC5 ARPC1B IQGAP2 DOCK1 ITGA6 ITGA5 ITGA7 ITGAX ITGB1 ITGB2 MSN MYH9 PFN1 PIK3R1 SSH3 PXN RDX VAV1 VCL EZR ACTN4 SCIN ACTN1 IQGAP1
3.6845099346997e-07	24	234	3.79243	Path:hsa05171 Coronavirus disease-COVID-19	https://www.genome.jp/kegg-bin/show_pathway?hsa05171	MAPK14 CYBB F13A1 FCGR2A RIGI IRF3 JAK1 MX1 NFKB1 OAS2 OAS3 PIK3R1 EIF2AK2 RELA IFIH1 STAT1 STAT3 ADAM17 C1QA C1QB C1QC C4B C5AR1 CASP1
2.65025297247733e-06	22	223	3.64787	Path:hsa05166 Human T-cell leukemia virus 1 infection	https://www.genome.jp/kegg-bin/show_pathway?hsa05166	CREB1 EP300 HLA-A HLA-B HLA-DMA HLA-DMB HLA-DPA1 HLA-DPB1 HLA-DRA HLA-DRB1 ITGB2 JAK1 MAP3K3 NFATC1 NFKB1 NFKB2 PIK3R1 B2M RELA STAT5A STAT5B CD4
2.97824816795604e-06	17	139	4.52226	Path:hsa05162 Measles	https://www.genome.jp/kegg-bin/show_pathway?hsa05162	RIGI IRF3 JAK1 MSN MX1 NFKB1 OAS2 OAS3 PIK3R1 EIF2AK2 RELA IFIH1 STAT1 STAT3 STAT5A STAT5B CASP3
3.06010567019084e-06	18	156	4.26648	Path:hsa04148 Efferocytosis	https://www.genome.jp/kegg-bin/show_pathway?hsa04148	ADAM10 CREB1 MAPK14 DOCK1 ABCA1 ANO6 ALOX5 LIPA NFATC1 PTPN6 CX3CL1 ADAM17 C1QA C1QB C1QC CASP1 CASP3 CASP7
3.06010567019084e-06	11	56	7.26317	Path:hsa05134 Legionellosis	https://www.genome.jp/kegg-bin/show_pathway?hsa05134	EEF1A1 PYCARD IL18 ITGB2 NFKB1 NFKB2 RELA CASP1 CASP3 CASP7 CD14
3.42185371840561e-06	12	69	6.43064	Path:hsa05416 Viral myocarditis	https://www.genome.jp/kegg-bin/show_pathway?hsa05416	HLA-A HLA-B HLA-DMA HLA-DMB HLA-DPA1 HLA-DPB1 HLA-DRA HLA-DRB1 ITGB2 LAMA2 SNTA1 CASP3
4.91830511578391e-06	14	99	5.22895	Path:hsa04933 AGE-RAGE signaling pathway in diabetic complications	https://www.genome.jp/kegg-bin/show_pathway?hsa04933	MAPK14 CYBB NFATC1 NFKB1 PIK3R1 PLCB3 RELA STAT1 STAT3 STAT5A STAT5B VCAM1 CASP3 PLCD4
6.44816516216352e-06	19	183	3.83905	Path:hsa04621 NOD-like receptor signaling pathway	https://www.genome.jp/kegg-bin/show_pathway?hsa04621	GBP4 NEK7 MAPK14 CYBA CYBB GBP2 PYCARD IL18 IRF3 JAK1 GBP7 NFKB1 OAS2 OAS3 PLCB3 ERBIN RELA STAT1 CASP1
6.46529778794393e-06	16	133	4.44826	Path:hsa04380 Osteoclast differentiation	https://www.genome.jp/kegg-bin/show_pathway?hsa04380	CREB1 MAPK14 CYBA FCGR2A FOSB JAK1 LCP2 NCF2 NCF4 NFATC1 NFKB1 NFKB2 PIK3R1 RELA STAT1 TYROBP
6.46529778794393e-06	14	102	5.07516	Path:hsa05146 Amoebiasis	https://www.genome.jp/kegg-bin/show_pathway?hsa05146	HSPB1 ITGB2 LAMA2 NFKB1 PRDX1 SERPINB6 PIK3R1 PLCB3 RELA VCL ACTN4 CASP3 ACTN1 CD14
8.01944959047197e-06	20	205	3.60743	Path:hsa05203 Viral carcinogenesis	https://www.genome.jp/kegg-bin/show_pathway?hsa05203	CREB1 EP300 HLA-A HLA-B IRF3 JAK1 NFKB1 NFKB2 PIK3R1 EIF2AK2 PXN REL RELA STAT3 STAT5A STAT5B ACTN4 CASP3 SCIN ACTN1
1.38284413077539e-05	13	94	5.11372	Path:hsa05150 Staphylococcus aureus infection	https://www.genome.jp/kegg-bin/show_pathway?hsa05150	FCGR2A HLA-DMA HLA-DMB HLA-DPA1 HLA-DPB1 HLA-DRA HLA-DRB1 ITGB2 C1QA C1QB C1QC C4B C5AR1
1.64202521377703e-05	9	43	7.73919	Path:hsa00513 Various types of N-glycan biosynthesis	https://www.genome.jp/kegg-bin/show_pathway?hsa00513	DAD1 DDOST HEXA HEXB STT3A OSTC RPN1 RPN2 MAGT1
1.78604622940673e-05	12	82	5.41114	Path:hsa04623 Cytosolic DNA-sensing pathway	https://www.genome.jp/kegg-bin/show_pathway?hsa04623	GSDME RIGI SAMHD1 PYCARD IL18 IRF3 NFKB1 RELA CASP1 CASP3 CASP7 IL33
1.88169501048276e-05	17	163	3.85641	Path:hsa05161 Hepatitis B	https://www.genome.jp/kegg-bin/show_pathway?hsa05161	CREB1 MAPK14 EP300 RIGI IRF3 JAK1 NFATC1 NFKB1 PIK3R1 RELA IFIH1 STAT1 STAT3 STAT5A STAT5B STAT6 CASP3
3.00549702168669e-05	17	169	3.71949	Path:hsa04530 Tight junction	https://www.genome.jp/kegg-bin/show_pathway?hsa04530	ARPC5 ARPC1B HCLS1 ITGB1 MSN MYH9 MYL6 F11R RDX TJP1 VASP EZR WAS ACTN4 CGNL1 YBX3 ACTN1
5.28154907142152e-05	8	38	7.78445	Path:hsa05330 Allograft rejection	https://www.genome.jp/kegg-bin/show_pathway?hsa05330	HLA-A HLA-B HLA-DMA HLA-DMB HLA-DPA1 HLA-DPB1 HLA-DRA HLA-DRB1
5.44904507067428e-05	16	159	3.72087	Path:hsa04514 Cell adhesion molecules	https://www.genome.jp/kegg-bin/show_pathway?hsa04514	HLA-A HLA-B HLA-DMA HLA-DMB HLA-DPA1 HLA-DPB1 HLA-DRA HLA-DRB1 ITGA6 ITGB1 ITGB2 CD99 F11R PTPRC VCAM1 CD4
5.98312652852172e-05	11	78	5.21459	Path:hsa05100 Bacterial invasion of epithelial cells	https://www.genome.jp/kegg-bin/show_pathway?hsa05100	ARPC1B DOCK1 CD2AP HCLS1 ILK ITGA5 ITGB1 SEPTIN2 PIK3R1 PXN VCL
6.7795522600961e-05	18	200	3.32785	Path:hsa05130 Pathogenic Escherichia coli infection	https://www.genome.jp/kegg-bin/show_pathway?hsa05130	ARPC5 ARPC1B TMED10 MAPK14 FCGR2A PYCARD HCLS1 IL18 ITGB1 MYH9 NFKB1 PTPN6 RELA TJP1 EZR CASP1 CASP3 CASP7
8.11936493175926e-05	18	203	3.27867	Path:hsa05205 Proteoglycans in cancer	https://www.genome.jp/kegg-bin/show_pathway?hsa05205	MAPK14 FLNA HCLS1 HGF ITGA5 ITGB1 MSN PIK3R1 PTPN6 PXN RDX STAT3 VAV1 EZR CASP3 IQGAP1 CD44 CD63
9.82645047460705e-05	14	132	3.92171	Path:hsa04142 Lysosome	https://www.genome.jp/kegg-bin/show_pathway?hsa04142	NPC2 TPP1 CTSD CTSH CTSS CTSZ HEXA HEXB LAMP1 LAMP2 LIPA ASAH1 PSAP CD63
9.82645047460705e-05	24	332	2.67297	Path:hsa05165 Human papillomavirus infection	https://www.genome.jp/kegg-bin/show_pathway?hsa05165	BCAP31 COL6A1 COL6A2 COL6A3 CREB1 EP300 HLA-A HLA-B ITGA6 IRF3 ITGA5 ITGA7 ITGB1 JAK1 LAMA2 MX1 NFKB1 NOTCH3 PIK3R1 EIF2AK2 PXN RELA STAT1 CASP3
9.94984001352428e-05	9	55	6.05064	Path:hsa00510 N-Glycan biosynthesis	https://www.genome.jp/kegg-bin/show_pathway?hsa00510	DAD1 DDOST GANAB STT3A OSTC RPN1 RPN2 MOGS MAGT1
9.94984001352428e-05	12	99	4.48196	Path:hsa04640 Hematopoietic cell lineage	https://www.genome.jp/kegg-bin/show_pathway?hsa04640	HLA-DMA HLA-DMB HLA-DPA1 HLA-DPB1 HLA-DRA HLA-DRB1 ITGA6 ITGA5 CD4 CD9 CD14 CD44
9.94984001352428e-05	7	31	8.34945	Path:hsa05310 Asthma	https://www.genome.jp/kegg-bin/show_pathway?hsa05310	FCER1G HLA-DMA HLA-DMB HLA-DPA1 HLA-DPB1 HLA-DRA HLA-DRB1
0.000109452	8	43	6.87928	Path:hsa04940 Type I diabetes mellitus	https://www.genome.jp/kegg-bin/show_pathway?hsa04940	HLA-A HLA-B HLA-DMA HLA-DMB HLA-DPA1 HLA-DPB1 HLA-DRA HLA-DRB1
0.000122636	70	1556	1.66345	Path:hsa01100 Metabolic pathways	https://www.genome.jp/kegg-bin/show_pathway?hsa01100	SDSL GALM COMT ADK RDH10 DAD1 ALDH1L2 DCK DDOST DPYD TYMP HACD2 ALDH1A1 AKR1B1 GANAB ALOX5 G6PD GGT5 OPLAH AMPD3 GPX1 GSR CERS2 HEXA HEXB HMBS HMOX1 HNMT APRT STT3A LTA4H STS MGST2 ASAH1 MT-ATP6 MT-ND4 OAT P4HA1 LAP3 PCYT1A ADA2 PGD PLCB3 PLOD1 LPCAT2 NAGK CMAS PTGS1 SQOR RENBP RPN1 RPN2 NADK PYCR3 SMPD2 BST1 TALDO1 TBXAS1 UGDH MOGS ITPKC NPL PLCD4 FBP2 SGPL1 KYNU PLOD3 PAPSS2 NAPRT PRDX6
0.000122793	11	86	4.72951	Path:hsa04610 Complement and coagulation cascades	https://www.genome.jp/kegg-bin/show_pathway?hsa04610	VSIG4 CLU F13A1 ITGAX ITGB2 SERPINA1 C1QA C1QB C1QC C4B C5AR1
0.000122793	8	44	6.72294	Path:hsa05332 Graft-versus-host disease	https://www.genome.jp/kegg-bin/show_pathway?hsa05332	HLA-A HLA-B HLA-DMA HLA-DMB HLA-DPA1 HLA-DPB1 HLA-DRA HLA-DRB1
0.000126591	14	137	3.77858	Path:hsa04210 Apoptosis	https://www.genome.jp/kegg-bin/show_pathway?hsa04210	PARP3 CTSD CTSH CTSS CTSZ LMNA MCL1 NFKB1 PIK3R1 RELA CAPN1 CASP3 CASP6 CASP7
0.000134803	14	138	3.7512	Path:hsa05322 Systemic lupus erythematosus	https://www.genome.jp/kegg-bin/show_pathway?hsa05322	FCGR2A HLA-DMA HLA-DMB HLA-DPA1 HLA-DPB1 HLA-DRA HLA-DRB1 TRIM21 C1QA C1QB C1QC C4B ACTN4 ACTN1
0.000175744	11	90	4.51931	Path:hsa05235 PD-L1 expression and PD-1 checkpoint pathway in cancer	https://www.genome.jp/kegg-bin/show_pathway?hsa05235	MAPK14 JAK1 MAP3K3 NFATC1 NFKB1 PIK3R1 PTPN6 RELA STAT1 STAT3 CD4
0.000231332	18	224	2.9713	Path:hsa05163 Human cytomegalovirus infection	https://www.genome.jp/kegg-bin/show_pathway?hsa05163	CREB1 MAPK14 PDIA3 HLA-A HLA-B IRF3 JAK1 NFATC1 NFKB1 PIK3R1 PLCB3 B2M PXN RELA CX3CL1 STAT3 TAP2 CASP3
0.000269378	19	248	2.83285	Path:hsa05132 Salmonella infection	https://www.genome.jp/kegg-bin/show_pathway?hsa05132	ARPC5 ARPC1B MAPK14 FLNA PYCARD ANXA2 IL18 NFKB1 SNX9 PFN1 PTPRC RELA S100A10 AHNAK CASP1 CASP3 DYNLRB2 CASP7 CD14
0.000442783	8	53	5.58131	Path:hsa05320 Autoimmune thyroid disease	https://www.genome.jp/kegg-bin/show_pathway?hsa05320	HLA-A HLA-B HLA-DMA HLA-DMB HLA-DPA1 HLA-DPB1 HLA-DRA HLA-DRB1
0.000583989	14	159	3.25576	Path:hsa05160 Hepatitis C	https://www.genome.jp/kegg-bin/show_pathway?hsa05160	RIGI IFIT1 IRF3 JAK1 MX1 NFKB1 OAS2 OAS3 PIK3R1 EIF2AK2 RELA STAT1 STAT3 CASP3
0.000612497	11	104	3.91094	Path:hsa04625 C-type lectin receptor signaling pathway	https://www.genome.jp/kegg-bin/show_pathway?hsa04625	MAPK14 FCER1G PYCARD LSP1 NFATC1 NFKB1 NFKB2 PIK3R1 RELA STAT1 CASP1
0.000701585	12	124	3.57834	Path:hsa04611 Platelet activation	https://www.genome.jp/kegg-bin/show_pathway?hsa04611	MAPK14 FCER1G FCGR2A ITGB1 LCP2 PIK3R1 PLCB3 PTGS1 TBXAS1 VASP FERMT3 VAMP8
0.000701585	13	143	3.36147	Path:hsa04936 Alcoholic liver disease	https://www.genome.jp/kegg-bin/show_pathway?hsa04936	C4B_2 MAPK14 IRF3 NFKB1 ADIPOR1 RELA C1QA C1QB C1QC C4B C5AR1 CASP3 CD14
0.000780892	8	58	5.10016	Path:hsa00480 Glutathione metabolism	https://www.genome.jp/kegg-bin/show_pathway?hsa00480	G6PD GGT5 OPLAH GPX1 GSR MGST2 LAP3 PGD
0.0013095	15	194	2.85898	Path:hsa05167 Kaposi sarcoma-associated herpesvirus infection	https://www.genome.jp/kegg-bin/show_pathway?hsa05167	CREB1 MAPK14 EP300 HLA-A HLA-B IRF3 JAK1 NFATC1 NFKB1 PIK3R1 EIF2AK2 RELA STAT1 STAT3 CASP3
0.00140653	10	97	3.81197	Path:hsa04666 Fc gamma R-mediated phagocytosis	https://www.genome.jp/kegg-bin/show_pathway?hsa04666	ARPC5 ARPC1B DOCK1 FCGR2A PIK3R1 PTPRC VASP VAV1 WAS SCIN
0.00182372	11	119	3.41796	Path:hsa04668 TNF signaling pathway	https://www.genome.jp/kegg-bin/show_pathway?hsa04668	CREB1 MAPK14 NFKB1 PIK3R1 RELA CX3CL1 ADAM17 VCAM1 CASP3 FRMD8 CASP7
0.00184152	13	159	3.02321	Path:hsa04217 Necroptosis	https://www.genome.jp/kegg-bin/show_pathway?hsa04217	CYBB FTL PYCARD JAK1 EIF2AK2 STAT1 STAT3 STAT5A STAT5B STAT6 CAPN1 CASP1 IL33
0.00204042	11	121	3.36147	Path:hsa04071 Sphingolipid signaling pathway	https://www.genome.jp/kegg-bin/show_pathway?hsa04071	MAPK14 CTSD FCER1G CERS2 ASAH1 NFKB1 PIK3R1 PLCB3 RELA SMPD2 SGPL1
0.00235276	9	86	3.8696	Path:hsa05412 Arrhythmogenic right ventricular cardiomyopathy	https://www.genome.jp/kegg-bin/show_pathway?hsa05412	DES GJA1 ITGA6 ITGA5 ITGA7 ITGB1 LAMA2 LMNA SNTA1
0.00264509	7	54	4.7932	Path:hsa00600 Sphingolipid metabolism	https://www.genome.jp/kegg-bin/show_pathway?hsa00600	CERS2 HEXA HEXB ASAH1 PSAP SMPD2 SGPL1
0.00271965	15	210	2.64115	Path:hsa05170 Human immunodeficiency virus 1 infection	https://www.genome.jp/kegg-bin/show_pathway?hsa05170	MAPK14 SAMHD1 PDIA3 HLA-A HLA-B IRF3 NFATC1 NFKB1 PIK3R1 B2M PXN RELA TAP2 CASP3 CD4
0.00277854	8	71	4.16633	Path:hsa04917 Prolactin signaling pathway	https://www.genome.jp/kegg-bin/show_pathway?hsa04917	MAPK14 NFKB1 PIK3R1 RELA STAT1 STAT3 STAT5A STAT5B
0.00285725	9	89	3.73916	Path:hsa04512 ECM-receptor interaction	https://www.genome.jp/kegg-bin/show_pathway?hsa04512	COL6A1 COL6A2 COL6A3 ITGA6 ITGA5 ITGA7 ITGB1 LAMA2 CD44
0.00364983	11	131	3.10487	Path:hsa04650 Natural killer cell mediated cytotoxicity	https://www.genome.jp/kegg-bin/show_pathway?hsa04650	FCER1G HLA-A HLA-B ITGB2 LCP2 NFATC1 PIK3R1 PTPN6 TYROBP VAV1 CASP3
0.00382348	9	93	3.57834	Path:hsa04520 Adherens junction	https://www.genome.jp/kegg-bin/show_pathway?hsa04520	SORBS1 EP300 PTPN6 TJP1 VCL WAS ACTN4 ACTN1 IQGAP1
0.00508923	7	61	4.24317	Path:hsa04330 Notch signaling pathway	https://www.genome.jp/kegg-bin/show_pathway?hsa04330	EP300 NOTCH3 APH1A ADAM17 TLE1 TLE3 TLE4
0.0051847	10	117	3.16035	Path:hsa03082 ATP-dependent chromatin remodeling	https://www.genome.jp/kegg-bin/show_pathway?hsa03082	BRD7 INO80 SMARCC2 YY1 ARID1A SMARCA5 ACTL6A RUVBL1 MBD2 BAZ1B
0.00531412	5	31	5.9639	Path:hsa03060 Protein export	https://www.genome.jp/kegg-bin/show_pathway?hsa03060	SEC63 SEC11A SEC61A1 SRP9 SRP54
0.00535839	14	204	2.53758	Path:hsa05415 Diabetic cardiomyopathy	https://www.genome.jp/kegg-bin/show_pathway?hsa05415	MAPK14 CTSD CYBA CYBB G6PD GSR MT-ATP6 MT-ND4 NCF2 NCF4 NFKB1 PIK3R1 PLCB3 RELA
0.00613555	11	141	2.88466	Path:hsa05418 Fluid shear stress and atherosclerosis	https://www.genome.jp/kegg-bin/show_pathway?hsa05418	MAPK14 CYBA HMOX1 MGST2 NCF2 NFKB1 PIK3R1 TRPV4 RELA BMPR1B VCAM1
0.00634488	10	121	3.05588	Path:hsa04660 T cell receptor signaling pathway	https://www.genome.jp/kegg-bin/show_pathway?hsa04660	MAPK14 LCP2 NFATC1 NFKB1 PIK3R1 PTPN6 PTPRC RELA VAV1 CD4
0.00743275	6	49	4.52769	Path:hsa04672 Intestinal immune network for IgA production	https://www.genome.jp/kegg-bin/show_pathway?hsa04672	HLA-DMA HLA-DMB HLA-DPA1 HLA-DPB1 HLA-DRA HLA-DRB1
0.00764556	13	190	2.52995	Path:hsa04613 Neutrophil extracellular trap formation	https://www.genome.jp/kegg-bin/show_pathway?hsa04613	MAPK14 CYBA CYBB FCGR2A ITGB2 NCF2 NCF4 NFKB1 PIK3R1 PLCB3 RELA C5AR1 CASP1
0.00773864	12	168	2.64115	Path:hsa04630 JAK-STAT signaling pathway	https://www.genome.jp/kegg-bin/show_pathway?hsa04630	EP300 GFAP JAK1 MCL1 PIK3R1 PTPN6 STAT1 STAT3 STAT5A STAT5B STAT6 OSMR
0.00932428	7	69	3.7512	Path:hsa05120 Epithelial cell signaling in Helicobacter pylori infection	https://www.genome.jp/kegg-bin/show_pathway?hsa05120	MAPK14 NFKB1 F11R RELA ADAM17 TJP1 CASP3
0.0107973	5	37	4.99678	Path:hsa00520 Amino sugar and nucleotide sugar metabolism	https://www.genome.jp/kegg-bin/show_pathway?hsa00520	HEXA HEXB NAGK RENBP UGDH
0.0115998	7	72	3.5949	Path:hsa04622 RIG-I-like receptor signaling pathway	https://www.genome.jp/kegg-bin/show_pathway?hsa04622	MAPK14 RIGI IRF3 NFKB1 RELA IFIH1 TRIM25
0.0129195	8	93	3.18074	Path:hsa05323 Rheumatoid arthritis	https://www.genome.jp/kegg-bin/show_pathway?hsa05323	HLA-DMA HLA-DMB HLA-DPA1 HLA-DPB1 HLA-DRA HLA-DRB1 IL18 ITGB2
0.0164062	5	41	4.50929	Path:hsa04216 Ferroptosis	https://www.genome.jp/kegg-bin/show_pathway?hsa04216	CYBB SLC39A14 FTL HMOX1 STEAP3
0.0181996	9	120	2.77321	Path:hsa04935 Growth hormone synthesis secretion and action	https://www.genome.jp/kegg-bin/show_pathway?hsa04935	CREB1 MAPK14 EP300 PIK3R1 PLCB3 STAT1 STAT3 STAT5A STAT5B
0.0182445	8	99	2.98797	Path:hsa05410 Hypertrophic cardiomyopathy	https://www.genome.jp/kegg-bin/show_pathway?hsa05410	DES ITGA6 ITGA5 ITGA7 ITGB1 LAMA2 LMNA SNTA1
0.0204813	10	145	2.55008	Path:hsa03008 Ribosome biogenesis in eukaryotes	https://www.genome.jp/kegg-bin/show_pathway?hsa03008	NOP56 RPP38 WDR3 DKC1 FBL XRN2 FBLL1 NOP58 GAR1 NAT10
0.0211671	6	62	3.57834	Path:hsa00590 Arachidonic acid metabolism	https://www.genome.jp/kegg-bin/show_pathway?hsa00590	PTGR1 ALOX5 GGT5 LTA4H PTGS1 TBXAS1
0.0211671	8	102	2.90009	Path:hsa05142 Chagas disease	https://www.genome.jp/kegg-bin/show_pathway?hsa05142	MAPK14 NFKB1 PIK3R1 PLCB3 RELA C1QA C1QB C1QC
0.0229105	5	45	4.10846	Path:hsa02010 ABC transporters	https://www.genome.jp/kegg-bin/show_pathway?hsa02010	ABCC4 ABCA1 ABCD1 ABCD4 TAP2
0.0244657	8	105	2.81723	Path:hsa05414 Dilated cardiomyopathy	https://www.genome.jp/kegg-bin/show_pathway?hsa05414	DES ITGA6 ITGA5 ITGA7 ITGB1 LAMA2 LMNA SNTA1
0.0246159	5	46	4.01915	Path:hsa03050 Proteasome	https://www.genome.jp/kegg-bin/show_pathway?hsa03050	PSMB8 PSMB9 PSMB10 PSME1 PSME2
0.0264001	3	16	6.93303	Path:hsa03273 Virion-Lassa virus and SFTS virus	https://www.genome.jp/kegg-bin/show_pathway?hsa03273	LAMP1 LAMP2 MYH9
0.0264581	8	107	2.76457	Path:hsa03013 Nucleocytoplasmic transport	https://www.genome.jp/kegg-bin/show_pathway?hsa03013	EEF1A1 NUP205 NUP210 NUP43 NUP88 NUP54 NUP155 NUP93
0.027634	8	108	2.73897	Path:hsa04620 Toll-like receptor signaling pathway	https://www.genome.jp/kegg-bin/show_pathway?hsa04620	MAPK14 IRF3 JAK1 NFKB1 PIK3R1 RELA STAT1 CD14
0.0276582	13	227	2.11758	Path:hsa05208 Chemical carcinogenesis-reactive oxygen species	https://www.genome.jp/kegg-bin/show_pathway?hsa05208	MAPK14 CYBA EPHX1 HGF HMOX1 MGST2 MT-ATP6 MT-ND4 NCF2 NFKB1 PIK3R1 RELA SOD2
0.0279235	4	31	4.77112	Path:hsa00030 Pentose phosphate pathway	https://www.genome.jp/kegg-bin/show_pathway?hsa00030	G6PD PGD TALDO1 FBP2
0.0279662	6	67	3.3113	Path:hsa05221 Acute myeloid leukemia	https://www.genome.jp/kegg-bin/show_pathway?hsa05221	NFKB1 PIK3R1 RELA STAT3 STAT5A STAT5B
0.0296967	6	68	3.2626	Path:hsa04664 Fc epsilon RI signaling pathway	https://www.genome.jp/kegg-bin/show_pathway?hsa04664	MAPK14 FCER1G ALOX5 LCP2 PIK3R1 VAV1
0.0380051	7	93	2.78315	Path:hsa05222 Small cell lung cancer	https://www.genome.jp/kegg-bin/show_pathway?hsa05222	ITGA6 ITGB1 LAMA2 NFKB1 PIK3R1 RELA CASP3
0.0380051	6	72	3.08135	Path:hsa05223 Non-small cell lung cancer	https://www.genome.jp/kegg-bin/show_pathway?hsa05223	HGF PIK3R1 STAT3 STAT5A STAT5B STK4
0.0416973	11	190	2.14072	Path:hsa04062 Chemokine signaling pathway	https://www.genome.jp/kegg-bin/show_pathway?hsa04062	NFKB1 PIK3R1 PLCB3 PXN RELA CX3CL1 STAT1 STAT3 STAT5B VAV1 WAS
0.0483509	15	300	1.84881	Path:hsa04010 MAPK signaling pathway	https://www.genome.jp/kegg-bin/show_pathway?hsa04010	MAP3K2 MAPK14 FLNA HGF HSPB1 IL1RAP MAP3K3 NFATC1 NFKB1 NFKB2 RELA STK3 STK4 CASP3 CD14
0.0501214	6	77	2.88126	Path:hsa05212 Pancreatic cancer	https://www.genome.jp/kegg-bin/show_pathway?hsa05212	JAK1 NFKB1 PIK3R1 RELA STAT1 STAT3
0.0603973	7	103	2.51294	Path:hsa04064 NF-kappa B signaling pathway	https://www.genome.jp/kegg-bin/show_pathway?hsa04064	RIGI NFKB1 NFKB2 RELA VCAM1 TRIM25 CD14
0.062563	17	367	1.71279	Path:hsa05014 Amyotrophic lateral sclerosis	https://www.genome.jp/kegg-bin/show_pathway?hsa05014	MAPK14 HNRNPA1L2 NUP205 NUP210 GPX1 HNRNPA1 NUP43 MT-ATP6 MT-ND4 NUP88 PFN1 NUP54 PRPH CASP1 CASP3 NUP155 NUP93
0.0678959	6	83	2.67297	Path:hsa04662 B cell receptor signaling pathway	https://www.genome.jp/kegg-bin/show_pathway?hsa04662	NFATC1 NFKB1 PIK3R1 PTPN6 RELA VAV1
0.0732518	6	85	2.61008	Path:hsa01232 Nucleotide metabolism	https://www.genome.jp/kegg-bin/show_pathway?hsa01232	ADK DCK TYMP AMPD3 APRT ADA2
0.0732518	5	63	2.93462	Path:hsa03250 Viral life cycle-HIV-1	https://www.genome.jp/kegg-bin/show_pathway?hsa03250	CPSF6 EP300 SAMHD1 MX1 CD4
0.0732518	9	157	2.11965	Path:hsa04218 Cellular senescence	https://www.genome.jp/kegg-bin/show_pathway?hsa04218	MAPK14 HLA-A HLA-B NFATC1 NFKB1 PIK3R1 TRPV4 RELA CAPN1
0.0744561	2	10	7.39523	Path:hsa00920 Sulfur metabolism	https://www.genome.jp/kegg-bin/show_pathway?hsa00920	SQOR PAPSS2
0.0744561	7	109	2.37462	Path:hsa04066 HIF-1 signaling pathway	https://www.genome.jp/kegg-bin/show_pathway?hsa04066	CYBB EP300 HMOX1 NFKB1 PIK3R1 RELA STAT3
0.0812345	22	529	1.53776	Path:hsa05200 Pathways in cancer	https://www.genome.jp/kegg-bin/show_pathway?hsa05200	EP300 HGF HMOX1 ITGA6 ITGB1 JAK1 LAMA2 MGST2 NFKB1 NFKB2 NOTCH3 PIK3R1 PLCB3 RELA STAT1 STAT3 STAT5A STAT5B STAT6 STK4 CASP3 CASP7
0.0901413	6	90	2.46508	Path:hsa04211 Longevity regulating pathway	https://www.genome.jp/kegg-bin/show_pathway?hsa04211	CREB1 NFKB1 ADIPOR1 PIK3R1 RELA SOD2
0.0945317	13	275	1.74796	Path:hsa05020 Prion disease	https://www.genome.jp/kegg-bin/show_pathway?hsa05020	CREB1 MAPK14 CYBA CYBB MT-ATP6 MT-ND4 NCF2 NCF4 PIK3R1 C1QA C1QB C1QC CASP3
0.0964717	16	362	1.63431	Path:hsa04151 PI3K-Akt signaling pathway	https://www.genome.jp/kegg-bin/show_pathway?hsa04151	COL6A1 COL6A2 COL6A3 CREB1 HGF ITGA6 ITGA5 ITGA7 ITGB1 JAK1 LAMA2 MCL1 NFKB1 PIK3R1 RELA OSMR
0.100699	4	48	3.08135	Path:hsa03272 Virion-Hepatitis viruses	https://www.genome.jp/kegg-bin/show_pathway?hsa03272	LAMP1 LAMP2 CD9 CD63
0.104775	4	49	3.01846	Path:hsa00330 Arginine and proline metabolism	https://www.genome.jp/kegg-bin/show_pathway?hsa00330	OAT P4HA1 LAP3 PYCR3
0.104775	4	49	3.01846	Path:hsa05030 Cocaine addiction	https://www.genome.jp/kegg-bin/show_pathway?hsa05030	CREB1 FOSB NFKB1 RELA
0.104775	4	49	3.01846	Path:hsa05144 Malaria	https://www.genome.jp/kegg-bin/show_pathway?hsa05144	HGF IL18 ITGB2 VCAM1
0.112255	3	30	3.69762	Path:hsa01523 Antifolate resistance	https://www.genome.jp/kegg-bin/show_pathway?hsa01523	ABCC4 NFKB1 RELA
0.116656	4	51	2.90009	Path:hsa04979 Cholesterol metabolism	https://www.genome.jp/kegg-bin/show_pathway?hsa04979	ABCA1 LDLRAP1 LIPA SOAT1
0.118678	5	74	2.49839	Path:hsa04918 Thyroid hormone synthesis	https://www.genome.jp/kegg-bin/show_pathway?hsa04918	CREB1 GPX1 GSR PLCB3 SLC5A5
0.128355	5	76	2.43264	Path:hsa03320 PPAR signaling pathway	https://www.genome.jp/kegg-bin/show_pathway?hsa03320	SORBS1 PLIN2 DBI FABP5 ILK
0.128355	5	76	2.43264	Path:hsa05220 Chronic myeloid leukemia	https://www.genome.jp/kegg-bin/show_pathway?hsa05220	NFKB1 PIK3R1 RELA STAT5A STAT5B
0.139771	2	15	4.93015	Path:hsa00541 Biosynthesis of various nucleotide sugars	https://www.genome.jp/kegg-bin/show_pathway?hsa00541	CMAS UGDH
0.139771	2	15	4.93015	Path:hsa00604 Glycosphingolipid biosynthesis-ganglio series	https://www.genome.jp/kegg-bin/show_pathway?hsa00604	HEXA HEXB
0.140771	10	211	1.75242	Path:hsa04015 Rap1 signaling pathway	https://www.genome.jp/kegg-bin/show_pathway?hsa04015	MAPK14 HGF ITGB1 ITGB2 LCP2 PFN1 PIK3R1 PLCB3 VASP VAV1
0.146892	9	185	1.79884	Path:hsa03040 Spliceosome	https://www.genome.jp/kegg-bin/show_pathway?hsa03040	HNRNPA1L2 HNRNPA1 HNRNPC HNRNPU LSM8 PRPF38B LSM2 PRPF4 DDX46
0.153413	2	16	4.62202	Path:hsa00603 Glycosphingolipid biosynthesis-globo and isoglobo series	https://www.genome.jp/kegg-bin/show_pathway?hsa00603	HEXA HEXB
0.161283	3	36	3.08135	Path:hsa01250 Biosynthesis of nucleotide sugars	https://www.genome.jp/kegg-bin/show_pathway?hsa01250	NAGK CMAS UGDH
0.161283	3	36	3.08135	Path:hsa05143 African trypanosomiasis	https://www.genome.jp/kegg-bin/show_pathway?hsa05143	IL18 PLCB3 VCAM1
0.165561	4	59	2.50686	Path:hsa04370 VEGF signaling pathway	https://www.genome.jp/kegg-bin/show_pathway?hsa04370	MAPK14 HSPB1 PIK3R1 PXN
0.17759	13	311	1.54563	Path:hsa05206 MicroRNAs in cancer	https://www.genome.jp/kegg-bin/show_pathway?hsa05206	EP300 HMOX1 ITGA5 MCL1 NFKB1 NOTCH3 PIK3R1 RDX STAT3 EZR VIM CASP3 CD44
0.178031	3	38	2.91917	Path:hsa00760 Nicotinate and nicotinamide metabolism	https://www.genome.jp/kegg-bin/show_pathway?hsa00760	NADK BST1 NAPRT
0.178031	3	38	2.91917	Path:hsa05340 Primary immunodeficiency	https://www.genome.jp/kegg-bin/show_pathway?hsa05340	PTPRC TAP2 CD4
0.17815	2	18	4.10846	Path:hsa00511 Other glycan degradation	https://www.genome.jp/kegg-bin/show_pathway?hsa00511	HEXA HEXB
0.17815	2	18	4.10846	Path:hsa04980 Cobalamin transport and metabolism	https://www.genome.jp/kegg-bin/show_pathway?hsa04980	PRDX1 ABCD4
0.182378	8	168	1.76077	Path:hsa05225 Hepatocellular carcinoma	https://www.genome.jp/kegg-bin/show_pathway?hsa05225	BRD7 HGF HMOX1 MGST2 PIK3R1 SMARCC2 ARID1A ACTL6A
0.192926	2	19	3.89223	Path:hsa00531 Glycosaminoglycan degradation	https://www.genome.jp/kegg-bin/show_pathway?hsa00531	HEXA HEXB

## Sheet: enrichment_downregulated_protei
Enrichment FDR	nGenes	Pathway Genes	Fold Enrichment	Pathway	URL	Genes
1.12706682360714e-32	34	78	18.9497	Path:hsa04721 Synaptic vesicle cycle	https://www.genome.jp/kegg-bin/show_pathway?hsa04721	CPLX2 CPLX1 STX1B AP2M1 CLTA CLTC SLC32A1 AP2A1 AP2A2 AP2B1 NSF ATP6V1D ATP6V1A ATP6V1B1 ATP6V1B2 ATP6V1C1 ATP6V1E1 ATP6V1G2 ATP6V0A1 SLC17A7 SLC17A6 RAB3A SLC6A1 SLC6A2 SLC6A7 SLC6A9 SLC6A11 SLC6A12 STXBP1 VAMP2 SYT1 CLTCL1 ATP6V0D1 ATP6V1F
2.52312534114375e-15	21	75	12.1724	Path:hsa04971 Gastric acid secretion	https://www.genome.jp/kegg-bin/show_pathway?hsa04971	ADCY2 ADCY8 GNAI1 GNAI2 ATP1A1 ATP1A2 ATP1A3 ATP1A4 ATP1B1 ATP1B3 ATP4A PLCB2 PLCB4 KCNK10 PRKCG SLC9A1 SSTR2 CAMK2A CAMK2B CAMK2D CAMK2G
4.78340373094477e-15	18	52	15.0483	Path:hsa04961 Endocrine and other factor-regulated calcium reabsorption	https://www.genome.jp/kegg-bin/show_pathway?hsa04961	AP2M1 CLTA CLTC AP2A1 AP2A2 AP2B1 ATP1A1 ATP1A2 ATP1A3 ATP1A4 ATP1B1 ATP1B3 ATP2B3 PLCB2 PLCB4 PRKCG SLC8A1 CLTCL1
8.25548276389687e-15	24	114	9.15219	Path:hsa04725 Cholinergic synapse	https://www.genome.jp/kegg-bin/show_pathway?hsa04725	ADCY2 ADCY8 FYN GNA11 GNAI1 GNAI2 GNAO1 GNB1 GNG3 GNG4 HRAS KCNQ2 KCNQ3 KRAS NRAS GNG13 PLCB2 PLCB4 GNG2 PRKCG CAMK2A CAMK2B CAMK2D CAMK2G
4.63699157516416e-14	21	89	10.2576	Path:hsa04727 GABAergic synapse	https://www.genome.jp/kegg-bin/show_pathway?hsa04727	ADCY2 ADCY8 SLC32A1 ABAT GABBR1 GLUL GNAI1 GNAI2 GNAO1 GNB1 GNG3 GNG4 NSF GNG13 PLCL1 GNG2 PRKCG SLC12A5 SLC6A1 SLC6A11 SLC6A12
2.00452687961333e-13	20	85	10.2289	Path:hsa04911 Insulin secretion	https://www.genome.jp/kegg-bin/show_pathway?hsa04911	ADCY2 RAPGEF4 ADCY8 PCLO GNA11 ATP1A1 ATP1A2 ATP1A3 ATP1A4 ATP1B1 ATP1B3 PLCB2 PLCB4 PRKCG RAB3A VAMP2 CAMK2A CAMK2B CAMK2D CAMK2G
2.58068229236838e-12	20	97	8.96348	Path:hsa04925 Aldosterone synthesis and secretion	https://www.genome.jp/kegg-bin/show_pathway?hsa04925	ADCY2 ADCY8 GNA11 LDLR ATP1A1 ATP1A2 ATP1A3 ATP1A4 ATP1B1 ATP1B3 ATP2B3 PLCB2 PLCB4 PRKCE PRKCG CAMK1D CAMK2A CAMK2B CAMK2D CAMK2G
6.19842787211282e-12	84	1556	2.34687	Path:hsa01100 Metabolic pathways	https://www.genome.jp/kegg-bin/show_pathway?hsa01100	ACAA2 ADCY2 LIAS PLCD3 ADCY8 NT5C3B CKB CKMT1A ENPP6 DGKQ DHCR7 SARDH AGL ABAT AK1 ALDH3B1 FDFT1 FDPS SIRT2 ALPL GALNS GGT7 GK HPGDS GLUD1 GLUD2 GLUL GOT1 PGM2L1 GPT GSTM5 UQCR10 GYS1 HMGCS1 HMOX2 HPRT1 NAT8L IDI1 INPP5A ACAT2 ARSA ARSB MPI ASNS PGAM4 ASPA MVD MVK NAGA ATP12A ATP4A OXCT1 PAFAH1B2 NSDHL NT5C3A ATP6V1D ENPP1 ATP6V1A ATP6V1B1 ATP6V1B2 ATP6V1C1 ATP6V1E1 PIP4K2A PKM PLCB2 PLCB4 ATP6V1…
6.19842787211282e-12	21	115	7.93853	Path:hsa04724 Glutamatergic synapse	https://www.genome.jp/kegg-bin/show_pathway?hsa04724	ADCY2 ADCY8 DLG4 GLUL GNAI1 GNAI2 GNAO1 GNB1 GNG3 GNG4 GRIN2A GRM3 GRM4 GNG13 PLCB2 PLCB4 GNG2 PRKCG SLC17A7 SLC17A6 DLGAP1
4.38389041851384e-11	19	101	8.17807	Path:hsa04972 Pancreatic secretion	https://www.genome.jp/kegg-bin/show_pathway?hsa04972	ADCY2 ADCY8 RAB8A ATP1A1 ATP1A2 ATP1A3 ATP1A4 ATP1B1 ATP1B3 ATP2B3 PLCB2 PLCB4 PRKCG RAB27B RAP1A RAP1B SLC9A1 SLC12A2 RAB3D
1.63995418126812e-10	18	96	8.15117	Path:hsa04713 Circadian entrainment	https://www.genome.jp/kegg-bin/show_pathway?hsa04713	ADCY2 ADCY8 GNAI1 GNAI2 GNAO1 GNB1 GNG3 GNG4 GRIN2A GNG13 PLCB2 PLCB4 GNG2 PRKCG CAMK2A CAMK2B CAMK2D CAMK2G
1.75296261802285e-10	22	153	6.251	Path:hsa04261 Adrenergic signaling in cardiomyocytes	https://www.genome.jp/kegg-bin/show_pathway?hsa04261	CACNG2 ADCY2 RAPGEF4 ADCY8 GNAI1 GNAI2 ATP1A1 ATP1A2 ATP1A3 ATP1A4 ATP1B1 ATP1B3 ATP2B3 PLCB2 PLCB4 PPP2R5C SLC8A1 SLC9A1 CAMK2A CAMK2B CAMK2D CAMK2G
1.75296261802285e-10	11	27	17.7112	Path:hsa04966 Collecting duct acid secretion	https://www.genome.jp/kegg-bin/show_pathway?hsa04966	ATP4A ATP6V1D ATP6V1A ATP6V1B1 ATP6V1B2 ATP6V1C1 ATP6V1E1 ATP6V1G2 ATP6V0A1 ATP6V0D1 ATP6V1F
3.53142842129699e-10	26	226	5.00131	Path:hsa04024 cAMP signaling pathway	https://www.genome.jp/kegg-bin/show_pathway?hsa04024	ADCY2 RAPGEF4 ADCY8 GABBR1 GNAI1 GNAI2 GRIN2A ATP1A1 ATP1A2 ATP1A3 ATP1A4 ATP1B1 ATP1B3 ATP2B3 MAPK8 MAPK9 MAPK10 RAC3 RAP1A RAP1B SLC9A1 SSTR2 CAMK2A CAMK2B CAMK2D CAMK2G
4.23276096021026e-10	20	131	6.63708	Path:hsa04728 Dopaminergic synapse	https://www.genome.jp/kegg-bin/show_pathway?hsa04728	GNAI1 GNAI2 GNAO1 GNB1 GNG3 GNG4 GRIN2A GNG13 PLCB2 PLCB4 GNG2 PPP2R5C PRKCG MAPK8 MAPK9 MAPK10 CAMK2A CAMK2B CAMK2D CAMK2G
5.5081182487863e-10	27	250	4.69507	Path:hsa04144 Endocytosis	https://www.genome.jp/kegg-bin/show_pathway?hsa04144	ARFGEF2 RAB31 WWP1 AGAP3 AP2M1 CLTA CLTC AP2A1 AP2A2 AP2B1 FOLR2 AMPH BIN1 HRAS LDLR RAB8A ARFGAP1 SH3GLB2 RAB22A SH3GL1 SH3GL2 SH3GL3 CLTCL1 SNX4 DNAJC6 IQSEC1
6.62229966530629e-10	15	69	9.45063	Path:hsa05120 Epithelial cell signaling in Helicobacter pylori infection	https://www.genome.jp/kegg-bin/show_pathway?hsa05120	ATP6V1D ATP6V1A ATP6V1B1 ATP6V1B2 ATP6V1C1 ATP6V1E1 ATP6V1G2 ATP6V0A1 MAPK8 MAPK9 MAPK10 PTPN11 PTPRZ1 ATP6V0D1 ATP6V1F
2.12002083196312e-09	19	129	6.40298	Path:hsa04926 Relaxin signaling pathway	https://www.genome.jp/kegg-bin/show_pathway?hsa04926	ADCY2 ADCY8 GNAI1 GNAI2 GNAO1 GNB1 GNG3 GNG4 HRAS KRAS NRAS GNG13 PLCB2 PLCB4 GNG2 MAPK8 MAPK9 MAPK10 SOS1
3.77800449224359e-09	14	66	9.22152	Path:hsa04720 Long-term potentiation	https://www.genome.jp/kegg-bin/show_pathway?hsa04720	ADCY8 GRIN2A HRAS KRAS NRAS PLCB2 PLCB4 PRKCG RAP1A RAP1B CAMK2A CAMK2B CAMK2D CAMK2G
4.38325038962367e-09	16	92	7.5605	Path:hsa04912 GnRH signaling pathway	https://www.genome.jp/kegg-bin/show_pathway?hsa04912	ADCY2 ADCY8 GNA11 HRAS KRAS NRAS PLCB2 PLCB4 MAPK8 MAPK9 MAPK10 SOS1 CAMK2A CAMK2B CAMK2D CAMK2G
1.72252207406393e-08	24	236	4.42097	Path:hsa04014 Ras signaling pathway	https://www.genome.jp/kegg-bin/show_pathway?hsa04014	CSF1R GNB1 GNG3 GNG4 GRIN2A HRAS KRAS NF1 NRAS GNG13 GNG2 PRKCG MAPK8 MAPK9 MAPK10 PTPN11 RAC3 RALA RALB RAP1A RAP1B SOS1 BRAP RASAL1
1.72252207406393e-08	19	147	5.61895	Path:hsa04072 Phospholipase D signaling pathway	https://www.genome.jp/kegg-bin/show_pathway?hsa04072	ADCY2 RAPGEF4 ADCY8 DGKQ FYN GRM3 GRM4 HRAS KRAS NRAS PLCB2 PLCB4 PTPN11 RALA RALB RHEB SOS1 DGKE DGKD
1.81730756426617e-08	19	148	5.58098	Path:hsa04723 Retrograde endocannabinoid signaling	https://www.genome.jp/kegg-bin/show_pathway?hsa04723	ADCY2 ADCY8 SLC32A1 GNAI1 GNAI2 GNAO1 GNB1 GNG3 GNG4 GNG13 PLCB2 PLCB4 GNG2 PRKCG MAPK8 MAPK9 MAPK10 SLC17A7 SLC17A6
3.07832605889467e-08	17	121	6.10776	Path:hsa04071 Sphingolipid signaling pathway	https://www.genome.jp/kegg-bin/show_pathway?hsa04071	FYN GNAI1 GNAI2 HRAS KRAS NRAS PLCB2 PLCB4 S1PR5 PPP2R5C PRKCE PRKCG MAPK8 MAPK9 MAPK10 RAC3 SMPD1
3.07832605889467e-08	18	137	5.71177	Path:hsa04371 Apelin signaling pathway	https://www.genome.jp/kegg-bin/show_pathway?hsa04371	ADCY2 ADCY8 GNAI1 GNAI2 GNB1 GNG3 GNG4 HRAS KRAS NRAS GNG13 PLCB2 PLCB4 GNG2 PRKCE SLC8A1 SLC9A1 MAP1LC3A
3.07832605889467e-08	15	92	7.08797	Path:hsa04970 Salivary secretion	https://www.genome.jp/kegg-bin/show_pathway?hsa04970	ADCY2 ADCY8 ATP1A1 ATP1A2 ATP1A3 ATP1A4 ATP1B1 ATP1B3 ATP2B3 PLCB2 PLCB4 PRKCG SLC9A1 SLC12A2 VAMP2
3.78756177889094e-08	19	156	5.29478	Path:hsa04150 mTOR signaling pathway	https://www.genome.jp/kegg-bin/show_pathway?hsa04150	NPRL2 HRAS KRAS NRAS ATP6V1D ATP6V1A ATP6V1B1 ATP6V1B2 ATP6V1C1 ATP6V1E1 ATP6V1G2 PRKCG RHEB SLC3A2 SOS1 CASTOR2 STRADA ATP6V1F DEPDC5
7.19403357343291e-08	14	84	7.24548	Path:hsa04012 ErbB signaling pathway	https://www.genome.jp/kegg-bin/show_pathway?hsa04012	NRG3 HRAS KRAS NRAS PRKCG MAPK8 MAPK9 MAPK10 SOS1 CAMK2A CAMK2B CAMK2D CAMK2G NCK2
7.42162044564111e-08	10	37	11.7494	Path:hsa00250 Alanine aspartate and glutamate metabolism	https://www.genome.jp/kegg-bin/show_pathway?hsa00250	ABAT GLUD1 GLUD2 GLUL GOT1 GPT NAT8L ASNS ASPA ALDH5A1
8.71336011946833e-08	15	100	6.52093	Path:hsa04916 Melanogenesis	https://www.genome.jp/kegg-bin/show_pathway?hsa04916	ADCY2 ADCY8 GNAI1 GNAI2 GNAO1 HRAS KRAS NRAS PLCB2 PLCB4 PRKCG CAMK2A CAMK2B CAMK2D CAMK2G
9.385074699857e-08	17	132	5.59878	Path:hsa04142 Lysosome	https://www.genome.jp/kegg-bin/show_pathway?hsa04142	CLTA CLTC CTSL AP1B1 DMXL1 DMXL2 WDR7 GALNS GM2A ARSA ARSB NAGA ATP6V0A1 SMPD1 CLTCL1 AP3D1 ATP6V0D1
1.0067268905704e-07	11	49	9.75922	Path:hsa05110 Vibrio cholerae infection	https://www.genome.jp/kegg-bin/show_pathway?hsa05110	ATP6V1D ATP6V1A ATP6V1B1 ATP6V1B2 ATP6V1C1 ATP6V1E1 ATP6V1G2 ATP6V0A1 SLC12A2 ATP6V0D1 ATP6V1F
1.44633206684043e-07	16	120	5.79639	Path:hsa04935 Growth hormone synthesis secretion and action	https://www.genome.jp/kegg-bin/show_pathway?hsa04935	ADCY2 ADCY8 GNA11 GNAI1 GNAI2 HRAS KRAS NRAS PLCB2 PLCB4 PRKCG MAPK8 MAPK9 MAPK10 SOS1 SSTR2
1.7548520218205e-07	21	211	4.32669	Path:hsa04015 Rap1 signaling pathway	https://www.genome.jp/kegg-bin/show_pathway?hsa04015	ADCY2 RAPGEF4 ADCY8 CSF1R GNAI1 GNAI2 GNAO1 GRIN2A HRAS KRAS NRAS EVL PLCB2 PLCB4 APBB1IP PRKCG RAC3 RALA RALB RAP1A RAP1B
2.17643270027942e-07	8	23	15.121	Path:hsa04964 Proximal tubule bicarbonate reclamation	https://www.genome.jp/kegg-bin/show_pathway?hsa04964	GLUD1 GLUD2 ATP1A1 ATP1A2 ATP1A3 ATP1A4 ATP1B1 ATP1B3
3.089601617334e-07	15	111	5.87472	Path:hsa04726 Serotonergic synapse	https://www.genome.jp/kegg-bin/show_pathway?hsa04726	CYP4X1 GNAI1 GNAI2 GNAO1 GNB1 GNG3 GNG4 HRAS KRAS NRAS GNG13 PLCB2 PLCB4 GNG2 PRKCG
4.75466875204716e-07	14	99	6.14768	Path:hsa05231 Choline metabolism in cancer	https://www.genome.jp/kegg-bin/show_pathway?hsa05231	DGKQ HRAS KRAS NRAS PRKCG MAPK8 MAPK9 MAPK10 GPCPD1 RAC3 RHEB SOS1 DGKE DGKD
5.19593211392175e-07	18	168	4.65781	Path:hsa04140 Autophagy-animal	https://www.genome.jp/kegg-bin/show_pathway?hsa04140	YKT6 RAB39B CTSL DAPK2 NRBF2 HRAS KRAS RAB8A NRAS ZFYVE1 STX17 MAPK8 MAPK9 MAPK10 RAB1A RHEB RAB33B MAP1LC3A
6.4462908577102e-07	11	59	8.10512	Path:hsa04730 Long-term depression	https://www.genome.jp/kegg-bin/show_pathway?hsa04730	GNA11 GNAI1 GNAI2 GNAO1 GNAZ HRAS KRAS NRAS PLCB2 PLCB4 PRKCG
6.68708607650724e-07	17	153	4.83032	Path:hsa04921 Oxytocin signaling pathway	https://www.genome.jp/kegg-bin/show_pathway?hsa04921	CACNG2 ADCY2 ADCY8 GNAI1 GNAI2 GNAO1 HRAS KRAS NRAS PLCB2 PLCB4 PRKCG CAMK1D CAMK2A CAMK2B CAMK2D CAMK2G
7.49532536001391e-07	13	88	6.42213	Path:hsa04540 Gap junction	https://www.genome.jp/kegg-bin/show_pathway?hsa04540	ADCY2 ADCY8 CSNK1D GNA11 GNAI1 GNAI2 HRAS KRAS NRAS PLCB2 PLCB4 PRKCG SOS1
7.62255276256942e-07	15	120	5.43411	Path:hsa04919 Thyroid hormone signaling pathway	https://www.genome.jp/kegg-bin/show_pathway?hsa04919	PLCD3 HRAS KRAS ATP1A1 ATP1A2 ATP1A3 ATP1A4 ATP1B1 ATP1B3 NRAS PLCB2 PLCB4 PRKCG RHEB SLC9A1
1.07175621504808e-06	13	91	6.21041	Path:hsa05032 Morphine addiction	https://www.genome.jp/kegg-bin/show_pathway?hsa05032	ADCY2 ADCY8 SLC32A1 GABBR1 GNAI1 GNAI2 GNAO1 GNB1 GNG3 GNG4 GNG13 GNG2 PRKCG
1.75244844400176e-06	20	224	3.88151	Path:hsa05163 Human cytomegalovirus infection	https://www.genome.jp/kegg-bin/show_pathway?hsa05163	ADCY2 ADCY8 GNA11 GNAI1 GNAI2 GNAO1 GNB1 GNG3 GNG4 HRAS KRAS NRAS GNG13 PLCB2 PLCB4 GNG2 PRKCG RAC3 RHEB SOS1
2.19582525426658e-06	13	97	5.82626	Path:hsa04750 Inflammatory mediator regulation of TRP channels	https://www.genome.jp/kegg-bin/show_pathway?hsa04750	ADCY2 ADCY8 PLCB2 PLCB4 PRKCE PRKCG MAPK8 MAPK9 MAPK10 CAMK2A CAMK2B CAMK2D CAMK2G
2.70321315351713e-06	18	190	4.11848	Path:hsa04062 Chemokine signaling pathway	https://www.genome.jp/kegg-bin/show_pathway?hsa04062	ADCY2 ADCY8 GNAI1 GNAI2 GNB1 GNG3 GNG4 HRAS KRAS NRAS GNG13 PLCB2 PLCB4 GNG2 RAC3 RAP1A RAP1B SOS1
2.70321315351713e-06	19	210	3.93326	Path:hsa05170 Human immunodeficiency virus 1 infection	https://www.genome.jp/kegg-bin/show_pathway?hsa05170	AP1B1 GNA11 GNAI1 GNAI2 GNAO1 GNB1 GNG3 GNG4 HRAS KRAS NRAS GNG13 GNG2 PRKCG MAPK8 MAPK9 MAPK10 RAC3 CUL1
3.74676591082177e-06	14	119	5.11446	Path:hsa04722 Neurotrophin signaling pathway	https://www.genome.jp/kegg-bin/show_pathway?hsa04722	HRAS KRAS NRAS MAPK8 MAPK9 MAPK10 PTPN11 RAP1A RAP1B SOS1 CAMK2A CAMK2B CAMK2D CAMK2G
4.66769553260662e-06	30	478	2.72842	Path:hsa05022 Pathways of neurodegeneration-multiple diseases	https://www.genome.jp/kegg-bin/show_pathway?hsa05022	CDK5 TPTEP2-CSNK1E DCTN3 RAB39B CSNK1E DCTN1 DLG4 GRIN2A UQCR10 NRBF2 HRAS KRAS RAB8A NRAS PLCB2 PLCB4 ZFYVE1 PRKCG ACTR10 MAPK8 MAPK9 MAPK10 PRNP RAB1A SNCA CAMK2A CAMK2B CAMK2D CAMK2G MAP1LC3A
5.50176123182289e-06	11	74	6.46219	Path:hsa04918 Thyroid hormone synthesis	https://www.genome.jp/kegg-bin/show_pathway?hsa04918	ADCY2 ADCY8 ATP1A1 ATP1A2 ATP1A3 ATP1A4 ATP1B1 ATP1B3 PLCB2 PLCB4 PRKCG
6.32006807381945e-06	17	182	4.06066	Path:hsa04360 Axon guidance	https://www.genome.jp/kegg-bin/show_pathway?hsa04360	CDK5 NTNG1 SRGAP2 FYN GNAI1 GNAI2 HRAS KRAS NRAS PTPN11 RAC3 CAMK2A CAMK2B CAMK2D CAMK2G NCK2 ABLIM2
7.17608589253638e-06	16	164	4.24126	Path:hsa04022 cGMP-PKG signaling pathway	https://www.genome.jp/kegg-bin/show_pathway?hsa04022	ADCY2 ADCY8 GNA11 GNAI1 GNAI2 ATP1A1 ATP1A2 ATP1A3 ATP1A4 ATP1B1 ATP1B3 ATP2B3 PLCB2 PLCB4 PRKCE SLC8A1
1.05799191863864e-05	8	38	9.15219	Path:hsa04960 Aldosterone-regulated sodium reabsorption	https://www.genome.jp/kegg-bin/show_pathway?hsa04960	KRAS ATP1A1 ATP1A2 ATP1A3 ATP1A4 ATP1B1 ATP1B3 PRKCG
1.1734414840828e-05	31	529	2.54756	Path:hsa05200 Pathways in cancer	https://www.genome.jp/kegg-bin/show_pathway?hsa05200	ADCY2 ADCY8 CSF1R DAPK2 GNA11 GNAI1 GNAI2 GNB1 GNG3 GNG4 GSTM5 HRAS KRAS NRAS GNG13 PLCB2 PLCB4 GNG2 PRKCG MAPK8 MAPK9 MAPK10 RAC3 RALA RALB SOS1 CAMK2A CAMK2B CAMK2D CAMK2G CUL1
1.64550549608235e-05	14	136	4.47515	Path:hsa00190 Oxidative phosphorylation	https://www.genome.jp/kegg-bin/show_pathway?hsa00190	PPA2 UQCR10 ATP12A ATP4A ATP6V1D ATP6V1A ATP6V1B1 ATP6V1B2 ATP6V1C1 ATP6V1E1 ATP6V1G2 ATP6V0A1 ATP6V0D1 ATP6V1F
4.18069363057884e-05	10	75	5.79639	Path:hsa05214 Glioma	https://www.genome.jp/kegg-bin/show_pathway?hsa05214	HRAS KRAS NRAS PRKCG CAMK1D SOS1 CAMK2A CAMK2B CAMK2D CAMK2G
4.35962705071305e-05	9	60	6.52093	Path:hsa04978 Mineral absorption	https://www.genome.jp/kegg-bin/show_pathway?hsa04978	HMOX2 ATP1A1 ATP1A2 ATP1A3 ATP1A4 ATP1B1 ATP1B3 ATP2B3 SLC8A1
4.66910107342293e-05	11	93	5.14196	Path:hsa05323 Rheumatoid arthritis	https://www.genome.jp/kegg-bin/show_pathway?hsa05323	CTSL ATP6V1D ATP6V1A ATP6V1B1 ATP6V1B2 ATP6V1C1 ATP6V1E1 ATP6V1G2 ATP6V0A1 ATP6V0D1 ATP6V1F
4.99844189243164e-05	6	23	11.3408	Path:hsa00900 Terpenoid backbone biosynthesis	https://www.genome.jp/kegg-bin/show_pathway?hsa00900	FDPS HMGCS1 IDI1 ACAT2 MVD MVK
5.01085326953173e-05	8	47	7.39964	Path:hsa04973 Carbohydrate digestion and absorption	https://www.genome.jp/kegg-bin/show_pathway?hsa04973	ATP1A1 ATP1A2 ATP1A3 ATP1A4 ATP1B1 ATP1B3 PLCB2 PLCB4
5.54531723384847e-05	15	173	3.76933	Path:hsa04310 Wnt signaling pathway	https://www.genome.jp/kegg-bin/show_pathway?hsa04310	TPTEP2-CSNK1E CSNK1E DAAM2 PLCB2 PLCB4 PRKCG MAPK8 MAPK9 MAPK10 RAC3 CAMK2A CAMK2B CAMK2D CAMK2G CUL1
5.93887809802311e-05	11	96	4.98127	Path:hsa04070 Phosphatidylinositol signaling system	https://www.genome.jp/kegg-bin/show_pathway?hsa04070	PLCD3 DGKQ INPP5A PIP4K2A PLCB2 PLCB4 PRKCG PIP4K2C DGKE DGKD MTMR2
6.10421673873692e-05	14	154	3.95208	Path:hsa04934 Cushing syndrome	https://www.genome.jp/kegg-bin/show_pathway?hsa04934	ADCY2 ADCY8 GNA11 GNAI1 GNAI2 LDLR PLCB2 PLCB4 RAP1A RAP1B CAMK2A CAMK2B CAMK2D CAMK2G
0.000103404	12	121	4.31136	Path:hsa04660 T cell receptor signaling pathway	https://www.genome.jp/kegg-bin/show_pathway?hsa04660	DLG1 FYN HRAS KRAS NRAS PPP2R5C MAPK8 MAPK9 MAPK10 PTPN11 SOS1 NCK2
0.00010829	9	68	5.75377	Path:hsa04664 Fc epsilon RI signaling pathway	https://www.genome.jp/kegg-bin/show_pathway?hsa04664	FYN HRAS KRAS NRAS MAPK8 MAPK9 MAPK10 RAC3 SOS1
0.00012117	6	27	9.66064	Path:hsa00650 Butanoate metabolism	https://www.genome.jp/kegg-bin/show_pathway?hsa00650	ABAT HMGCS1 ACAT2 OXCT1 OXCT2 ALDH5A1
0.000126293	12	124	4.20705	Path:hsa04611 Platelet activation	https://www.genome.jp/kegg-bin/show_pathway?hsa04611	ADCY2 ADCY8 FYN GNAI1 GNAI2 ARHGAP35 PLCB2 PLCB4 APBB1IP RAP1A RAP1B P2RY12
0.000128028	10	87	4.99688	Path:hsa04260 Cardiac muscle contraction	https://www.genome.jp/kegg-bin/show_pathway?hsa04260	CACNG2 UQCR10 ATP1A1 ATP1A2 ATP1A3 ATP1A4 ATP1B1 ATP1B3 SLC8A1 SLC9A1
0.000128028	10	87	4.99688	Path:hsa05210 Colorectal cancer	https://www.genome.jp/kegg-bin/show_pathway?hsa05210	HRAS KRAS NRAS MAPK8 MAPK9 MAPK10 RAC3 RALA RALB SOS1
0.000130136	21	332	2.74979	Path:hsa05165 Human papillomavirus infection	https://www.genome.jp/kegg-bin/show_pathway?hsa05165	DLG1 HRAS TNC KRAS NRAS ATP6V1D ATP6V1A ATP6V1B1 ATP6V1B2 ATP6V1C1 ATP6V1E1 PKM ATP6V1G2 ATP6V0A1 PPP2R5C RELN RHEB SOS1 TNR ATP6V0D1 ATP6V1F
0.000132998	11	106	4.51134	Path:hsa04922 Glucagon signaling pathway	https://www.genome.jp/kegg-bin/show_pathway?hsa04922	ADCY2 GYS1 PGAM4 PKM PLCB2 PLCB4 PYGM CAMK2A CAMK2B CAMK2D CAMK2G
0.000164982	10	90	4.83032	Path:hsa04976 Bile secretion	https://www.genome.jp/kegg-bin/show_pathway?hsa04976	ADCY2 ADCY8 LDLR ATP1A1 ATP1A2 ATP1A3 ATP1A4 ATP1B1 ATP1B3 SLC9A1
0.000201863	13	152	3.71808	Path:hsa04145 Phagosome	https://www.genome.jp/kegg-bin/show_pathway?hsa04145	CTSL DYNC1I1 ATP6V1D ATP6V1A ATP6V1B1 ATP6V1B2 ATP6V1C1 ATP6V1E1 ATP6V1G2 ATP6V0A1 ATP6V0D1 ATP6V1F VAMP3
0.000316599	13	159	3.55439	Path:hsa04217 Necroptosis	https://www.genome.jp/kegg-bin/show_pathway?hsa04217	GLUD1 GLUD2 GLUL PPIA MAPK8 MAPK9 MAPK10 PYGM SMPD1 CAMK2A CAMK2B CAMK2D CAMK2G
0.000322766	12	138	3.78025	Path:hsa04915 Estrogen signaling pathway	https://www.genome.jp/kegg-bin/show_pathway?hsa04915	ADCY2 ADCY8 GABBR1 GNAI1 GNAI2 GNAO1 HRAS KRAS NRAS PLCB2 PLCB4 SOS1
0.000349466	6	33	7.90416	Path:hsa04130 SNARE interactions in vesicular transport	https://www.genome.jp/kegg-bin/show_pathway?hsa04130	YKT6 STX1B STX17 VAMP1 VAMP2 VAMP3
0.000349466	10	99	4.3912	Path:hsa04933 AGE-RAGE signaling pathway in diabetic complications	https://www.genome.jp/kegg-bin/show_pathway?hsa04933	PLCD3 HRAS KRAS NRAS PLCB2 PLCB4 PRKCE MAPK8 MAPK9 MAPK10
0.000385368	8	64	5.43411	Path:hsa04929 GnRH secretion	https://www.genome.jp/kegg-bin/show_pathway?hsa04929	GABBR1 GNA11 HRAS KRAS NRAS PLCB2 PLCB4 PRKCG
0.000524427	15	215	3.03299	Path:hsa05417 Lipid and atherosclerosis	https://www.genome.jp/kegg-bin/show_pathway?hsa05417	HRAS KRAS LDLR NRAS PLCB2 PLCB4 MAPK8 MAPK9 MAPK10 RAP1A RAP1B CAMK2A CAMK2B CAMK2D CAMK2G
0.000533817	5	23	9.45063	Path:hsa00220 Arginine biosynthesis	https://www.genome.jp/kegg-bin/show_pathway?hsa00220	GLUD1 GLUD2 GLUL GOT1 GPT
0.000595556	15	218	2.99125	Path:hsa04081 Hormone signaling	https://www.genome.jp/kegg-bin/show_pathway?hsa04081	ADCY2 RAPGEF4 ADCY8 GNA11 GNAI1 GNAI2 GNAO1 GNB1 GNG3 GNG4 GNG13 PLCB2 PLCB4 GNG2 SSTR2
0.000891481	14	202	3.01297	Path:hsa04510 Focal adhesion	https://www.genome.jp/kegg-bin/show_pathway?hsa04510	FYN ARHGAP35 HRAS TNC PRKCG MAPK8 MAPK9 MAPK10 RELN RAC3 RAP1A RAP1B SOS1 TNR
0.00089456	16	252	2.76018	Path:hsa04020 Calcium signaling pathway	https://www.genome.jp/kegg-bin/show_pathway?hsa04020	ADCY2 PLCD3 ADCY8 GNA11 GRIN2A ATP2B3 PLCB2 PLCB4 PRKCG CAMK1D SLC8A1 TNNC2 CAMK2A CAMK2B CAMK2D CAMK2G
0.000995654	18	307	2.5489	Path:hsa05016 Huntington disease	https://www.genome.jp/kegg-bin/show_pathway?hsa05016	DCTN3 AP2M1 CLTA CLTC AP2A1 AP2A2 AP2B1 DCTN1 DLG4 UQCR10 NRBF2 PLCB2 PLCB4 ACTR10 MAPK8 MAPK9 MAPK10 CLTCL1
0.00119051	11	138	3.46523	Path:hsa04910 Insulin signaling pathway	https://www.genome.jp/kegg-bin/show_pathway?hsa04910	GYS1 HRAS INPP5A KRAS NRAS MAPK8 MAPK9 MAPK10 PYGM RHEB SOS1
0.00122064	9	96	4.07558	Path:hsa01522 Endocrine resistance	https://www.genome.jp/kegg-bin/show_pathway?hsa01522	ADCY2 ADCY8 HRAS KRAS NRAS MAPK8 MAPK9 MAPK10 SOS1
0.00141062	13	188	3.0061	Path:hsa05034 Alcoholism	https://www.genome.jp/kegg-bin/show_pathway?hsa05034	GNAI1 GNAI2 GNAO1 GNB1 GNG3 GNG4 GRIN2A HRAS KRAS NRAS GNG13 GNG2 SOS1
0.00186688	9	102	3.83584	Path:hsa05142 Chagas disease	https://www.genome.jp/kegg-bin/show_pathway?hsa05142	GNA11 GNAI1 GNAI2 GNAO1 PLCB2 PLCB4 MAPK8 MAPK9 MAPK10
0.00198225	9	103	3.7986	Path:hsa04974 Protein digestion and absorption	https://www.genome.jp/kegg-bin/show_pathway?hsa04974	ATP1A1 ATP1A2 ATP1A3 ATP1A4 ATP1B1 ATP1B3 PRCP SLC3A2 SLC8A1
0.0019928	17	300	2.46346	Path:hsa04010 MAPK signaling pathway	https://www.genome.jp/kegg-bin/show_pathway?hsa04010	CACNG2 CSF1R HRAS KRAS NF1 NRAS PPM1A PRKCG MAPK8 MAPK9 MAPK10 MAP4K2 RAC3 RAP1A RAP1B SOS1 MAP4K3
0.00277	13	203	2.78398	Path:hsa05205 Proteoglycans in cancer	https://www.genome.jp/kegg-bin/show_pathway?hsa05205	CTSL ANK1 HRAS KRAS NRAS PRKCG PTPN11 SLC9A1 SOS1 CAMK2A CAMK2B CAMK2D CAMK2G
0.00286655	13	204	2.77033	Path:hsa05415 Diabetic cardiomyopathy	https://www.genome.jp/kegg-bin/show_pathway?hsa05415	UQCR10 GYS1 PLCB2 PLCB4 PTPA PRKCG MAPK8 MAPK9 MAPK10 CAMK2A CAMK2B CAMK2D CAMK2G
0.00313871	7	69	4.41029	Path:hsa05211 Renal cell carcinoma	https://www.genome.jp/kegg-bin/show_pathway?hsa05211	HRAS KRAS NRAS PTPN11 RAP1A RAP1B SOS1
0.00364141	7	71	4.28606	Path:hsa00562 Inositol phosphate metabolism	https://www.genome.jp/kegg-bin/show_pathway?hsa00562	PLCD3 INPP5A PIP4K2A PLCB2 PLCB4 PIP4K2C MTMR2
0.00364141	7	71	4.28606	Path:hsa04917 Prolactin signaling pathway	https://www.genome.jp/kegg-bin/show_pathway?hsa04917	HRAS KRAS NRAS MAPK8 MAPK9 MAPK10 SOS1
0.00380297	9	114	3.43207	Path:hsa04928 Parathyroid hormone synthesis secretion and action	https://www.genome.jp/kegg-bin/show_pathway?hsa04928	ADCY2 ADCY8 STK39 GNA11 GNAI1 GNAI2 PLCB2 PLCB4 PRKCG
0.00385681	5	36	6.0379	Path:hsa00500 Starch and sucrose metabolism	https://www.genome.jp/kegg-bin/show_pathway?hsa00500	AGL PGM2L1 GYS1 ENPP1 PYGM
0.00396119	9	115	3.40223	Path:hsa04670 Leukocyte transendothelial migration	https://www.genome.jp/kegg-bin/show_pathway?hsa04670	RAPGEF4 GNAI1 GNAI2 ARHGAP35 PRKCG PTPN11 RAP1A RAP1B THY1
0.00531341	12	194	2.68905	Path:hsa05167 Kaposi sarcoma-associated herpesvirus infection	https://www.genome.jp/kegg-bin/show_pathway?hsa05167	GNB1 GNG3 GNG4 HRAS KRAS NRAS GNG13 GNG2 MAPK8 MAPK9 MAPK10 MAP1LC3A
0.00556036	7	77	3.95208	Path:hsa05212 Pancreatic cancer	https://www.genome.jp/kegg-bin/show_pathway?hsa05212	KRAS MAPK8 MAPK9 MAPK10 RAC3 RALA RALB
0.00733997	8	103	3.37654	Path:hsa04137 Mitophagy-animal	https://www.genome.jp/kegg-bin/show_pathway?hsa04137	HRAS MTX3 KRAS NRAS MAPK8 MAPK9 MAPK10 MAP1LC3A
0.00908998	5	44	4.9401	Path:hsa04962 Vasopressin-regulated water reabsorption	https://www.genome.jp/kegg-bin/show_pathway?hsa04962	DYNLL2 DCTN1 DYNC1I1 NSF VAMP2
0.00957531	9	132	2.96406	Path:hsa04068 FoxO signaling pathway	https://www.genome.jp/kegg-bin/show_pathway?hsa04068	TPTEP2-CSNK1E CSNK1E HRAS KRAS NRAS MAPK8 MAPK9 MAPK10 SOS1
0.00957531	6	64	4.07558	Path:hsa04927 Cortisol synthesis and secretion	https://www.genome.jp/kegg-bin/show_pathway?hsa04927	ADCY2 ADCY8 GNA11 LDLR PLCB2 PLCB4
0.0100166	8	109	3.19067	Path:hsa04931 Insulin resistance	https://www.genome.jp/kegg-bin/show_pathway?hsa04931	GYS1 PTPA PRKCE MAPK8 MAPK9 MAPK10 PTPN11 PYGM
0.0104906	8	110	3.16167	Path:hsa04914 Progesterone-mediated oocyte maturation	https://www.genome.jp/kegg-bin/show_pathway?hsa04914	ADCY2 ADCY8 GNAI1 GNAI2 KRAS MAPK8 MAPK9 MAPK10
0.0115701	5	47	4.62478	Path:hsa04930 Type II diabetes mellitus	https://www.genome.jp/kegg-bin/show_pathway?hsa04930	PKM PRKCE MAPK8 MAPK9 MAPK10
0.0125586	5	48	4.52843	Path:hsa00280 Valine leucine and isoleucine degradation	https://www.genome.jp/kegg-bin/show_pathway?hsa00280	ABAT HMGCS1 ACAT2 OXCT1 OXCT2
0.0131815	6	69	3.78025	Path:hsa05031 Amphetamine addiction	https://www.genome.jp/kegg-bin/show_pathway?hsa05031	GRIN2A PRKCG CAMK2A CAMK2B CAMK2D CAMK2G
0.0134769	5	49	4.43601	Path:hsa05030 Cocaine addiction	https://www.genome.jp/kegg-bin/show_pathway?hsa05030	DLG4 GNAI1 GNAI2 GRIN2A GRM3
0.0151277	9	143	2.73606	Path:hsa05017 Spinocerebellar ataxia	https://www.genome.jp/kegg-bin/show_pathway?hsa05017	GRIN2A NRBF2 PLCB2 PLCB4 PRKCG MAPK8 MAPK9 MAPK10 RELN
0.0163533	3	17	7.67169	Path:hsa00910 Nitrogen metabolism	https://www.genome.jp/kegg-bin/show_pathway?hsa00910	GLUD1 GLUD2 GLUL
0.0190414	6	75	3.47783	Path:hsa01230 Biosynthesis of amino acids	https://www.genome.jp/kegg-bin/show_pathway?hsa01230	GLUL GOT1 GPT ASNS PGAM4 PKM
0.02286	5	56	3.88151	Path:hsa04340 Hedgehog signaling pathway	https://www.genome.jp/kegg-bin/show_pathway?hsa04340	CSNK1D CSNK1E CSNK1G3 CSNK1G1 CUL1
0.0239303	6	79	3.30174	Path:hsa01521 EGFR tyrosine kinase inhibitor resistance	https://www.genome.jp/kegg-bin/show_pathway?hsa01521	HRAS KRAS NF1 NRAS PRKCG SOS1
0.02452	3	20	6.52093	Path:hsa00100 Steroid biosynthesis	https://www.genome.jp/kegg-bin/show_pathway?hsa00100	DHCR7 FDFT1 NSDHL
0.02452	9	156	2.50805	Path:hsa04148 Efferocytosis	https://www.genome.jp/kegg-bin/show_pathway?hsa04148	XKR4 RAB14 PTPN11 P2RY12 TYRO3 CAMK2A CAMK2B CAMK2D CAMK2G
0.02452	16	362	1.92145	Path:hsa04151 PI3K-Akt signaling pathway	https://www.genome.jp/kegg-bin/show_pathway?hsa04151	CSF1R GNB1 GNG3 GNG4 GYS1 HRAS TNC KRAS NRAS GNG13 GNG2 PPP2R5C RELN RHEB SOS1 TNR
0.02452	7	104	2.92606	Path:hsa04625 C-type lectin receptor signaling pathway	https://www.genome.jp/kegg-bin/show_pathway?hsa04625	HRAS KRAS NRAS MAPK8 MAPK9 MAPK10 PTPN11
0.0258586	8	131	2.65483	Path:hsa04650 Natural killer cell mediated cytotoxicity	https://www.genome.jp/kegg-bin/show_pathway?hsa04650	FYN HRAS KRAS NRAS PRKCG PTPN11 RAC3 SOS1
0.0266962	5	59	3.68414	Path:hsa04370 VEGF signaling pathway	https://www.genome.jp/kegg-bin/show_pathway?hsa04370	HRAS KRAS NRAS PRKCG RAC3
0.0294766	12	248	2.10353	Path:hsa05132 Salmonella infection	https://www.genome.jp/kegg-bin/show_pathway?hsa05132	DCTN3 DYNLL2 DCTN1 DYNC1I1 HRAS RHOG ACTR10 MAPK8 MAPK9 MAPK10 RALA RAB9A
0.0309782	3	22	5.92812	Path:hsa00340 Histidine metabolism	https://www.genome.jp/kegg-bin/show_pathway?hsa00340	ALDH3B1 ASPA CARNS1
0.0311518	6	85	3.06868	Path:hsa04742 Taste transduction	https://www.genome.jp/kegg-bin/show_pathway?hsa04742	ADCY8 GABBR1 GRM4 GNG13 PLCB2 PLCB4
0.031593	5	62	3.50588	Path:hsa04213 Longevity regulating pathway-multiple species	https://www.genome.jp/kegg-bin/show_pathway?hsa04213	ADCY2 ADCY8 HRAS KRAS NRAS
0.0316477	4	41	4.24126	Path:hsa05033 Nicotine addiction	https://www.genome.jp/kegg-bin/show_pathway?hsa05033	SLC32A1 GRIN2A SLC17A7 SLC17A6
0.0316477	7	111	2.74153	Path:hsa05145 Toxoplasmosis	https://www.genome.jp/kegg-bin/show_pathway?hsa05145	GNAI1 GNAI2 GNAO1 LDLR MAPK8 MAPK9 MAPK10
0.0316477	4	41	4.24126	Path:hsa05219 Bladder cancer	https://www.genome.jp/kegg-bin/show_pathway?hsa05219	DAPK2 HRAS KRAS NRAS
0.0321592	8	138	2.52017	Path:hsa04114 Oocyte meiosis	https://www.genome.jp/kegg-bin/show_pathway?hsa04114	ADCY2 ADCY8 PPP2R5C CAMK2A CAMK2B CAMK2D CAMK2G CUL1
0.0323908	5	63	3.45023	Path:hsa03250 Viral life cycle-HIV-1	https://www.genome.jp/kegg-bin/show_pathway?hsa03250	SERINC5 MAP1A MAP1B PIN1 PPIA
0.0369208	7	115	2.64618	Path:hsa01200 Carbon metabolism	https://www.genome.jp/kegg-bin/show_pathway?hsa01200	GLUD1 GLUD2 GOT1 GPT ACAT2 PGAM4 PKM
0.0378894	6	90	2.89819	Path:hsa04211 Longevity regulating pathway	https://www.genome.jp/kegg-bin/show_pathway?hsa04211	ADCY2 ADCY8 HRAS KRAS NRAS RHEB
0.0383945	16	387	1.79733	Path:hsa05010 Alzheimer disease	https://www.genome.jp/kegg-bin/show_pathway?hsa05010	CDK5 TPTEP2-CSNK1E RTN3 CSNK1E GRIN2A UQCR10 NRBF2 HRAS KRAS NRAS PLCB2 PLCB4 MAPK8 MAPK9 MAPK10 SNCA
0.0400965	5	67	3.24425	Path:hsa05221 Acute myeloid leukemia	https://www.genome.jp/kegg-bin/show_pathway?hsa05221	CSF1R HRAS KRAS NRAS SOS1
0.047863	7	122	2.49435	Path:hsa04152 AMPK signaling pathway	https://www.genome.jp/kegg-bin/show_pathway?hsa04152	GYS1 RAB8A RAB14 PPP2R5C RAB2A RHEB STRADA
0.0480713	9	179	2.18579	Path:hsa05152 Tuberculosis	https://www.genome.jp/kegg-bin/show_pathway?hsa05152	ATP6V0A1 MAPK8 MAPK9 MAPK10 CAMK2A CAMK2B CAMK2D CAMK2G ATP6V0D1
0.0491107	5	71	3.06147	Path:hsa05230 Central carbon metabolism in cancer	https://www.genome.jp/kegg-bin/show_pathway?hsa05230	HRAS KRAS PGAM4 NRAS PKM
0.0514371	5	72	3.01895	Path:hsa05223 Non-small cell lung cancer	https://www.genome.jp/kegg-bin/show_pathway?hsa05223	HRAS KRAS NRAS PRKCG SOS1
0.0528676	4	49	3.54881	Path:hsa00330 Arginine and proline metabolism	https://www.genome.jp/kegg-bin/show_pathway?hsa00330	CKB CKMT1A GOT1 CARNS1
0.0556811	11	246	1.94391	Path:hsa05131 Shigellosis	https://www.genome.jp/kegg-bin/show_pathway?hsa05131	PLCD3 TECPR1 PLCB2 PLCB4 PRKCE MAPK8 MAPK9 MAPK10 UBE2V1 CUL1 MAP1LC3A
0.0556811	10	215	2.022	Path:hsa05207 Chemical carcinogenesis-receptor activation	https://www.genome.jp/kegg-bin/show_pathway?hsa05207	ADCY2 ADCY8 GNAI1 GNAI2 GSTM5 HRAS KRAS NRAS PRKCG SOS1
0.0613261	5	76	2.86006	Path:hsa05220 Chronic myeloid leukemia	https://www.genome.jp/kegg-bin/show_pathway?hsa05220	HRAS KRAS NRAS PTPN11 SOS1
0.0639419	5	77	2.82292	Path:hsa05133 Pertussis	https://www.genome.jp/kegg-bin/show_pathway?hsa05133	GNAI1 GNAI2 MAPK8 MAPK9 MAPK10
0.0670147	7	133	2.28805	Path:hsa04270 Vascular smooth muscle contraction	https://www.genome.jp/kegg-bin/show_pathway?hsa04270	ADCY2 ADCY8 GNA11 PLCB2 PLCB4 PRKCE PRKCG
0.0670147	10	223	1.94946	Path:hsa05166 Human T-cell leukemia virus 1 infection	https://www.genome.jp/kegg-bin/show_pathway?hsa05166	ADCY2 ADCY8 DLG1 FDPS HRAS KRAS NRAS MAPK8 MAPK9 MAPK10
0.0682827	8	163	2.13364	Path:hsa05161 Hepatitis B	https://www.genome.jp/kegg-bin/show_pathway?hsa05161	HRAS KRAS NRAS PRKCG MAPK8 MAPK9 MAPK10 SOS1
0.0694226	9	194	2.01678	Path:hsa04814 Motor proteins	https://www.genome.jp/kegg-bin/show_pathway?hsa04814	DCTN3 DYNLL2 DCTN1 DYNC1I1 KIF3C MYO1D KIF1A ACTR10 TNNC2
0.0700819	3	32	4.07558	Path:hsa04215 Apoptosis-multiple species	https://www.genome.jp/kegg-bin/show_pathway?hsa04215	MAPK8 MAPK9 MAPK10
0.072075	10	227	1.91511	Path:hsa05208 Chemical carcinogenesis-reactive oxygen species	https://www.genome.jp/kegg-bin/show_pathway?hsa05208	GSTM5 UQCR10 HRAS KRAS NRAS MAPK8 MAPK9 MAPK10 PTPN11 SOS1
0.0741988	7	137	2.22124	Path:hsa04210 Apoptosis	https://www.genome.jp/kegg-bin/show_pathway?hsa04210	CTSL HRAS KRAS NRAS MAPK8 MAPK9 MAPK10
0.078463	8	169	2.05789	Path:hsa04530 Tight junction	https://www.genome.jp/kegg-bin/show_pathway?hsa04530	DLG1 RAB8A RAB8B PRKCE MAPK8 MAPK9 MAPK10 RAP1A
0.078463	10	231	1.88194	Path:hsa04810 Regulation of actin cytoskeleton	https://www.genome.jp/kegg-bin/show_pathway?hsa04810	ARHGAP35 HRAS KRAS NRAS CYRIB PIP4K2A RAC3 SLC9A1 SOS1 PIP4K2C
0.0785886	5	83	2.61885	Path:hsa04662 B cell receptor signaling pathway	https://www.genome.jp/kegg-bin/show_pathway?hsa04662	HRAS KRAS NRAS RAC3 SOS1
0.0785886	3	34	3.83584	Path:hsa04710 Circadian rhythm	https://www.genome.jp/kegg-bin/show_pathway?hsa04710	CSNK1D CSNK1E CUL1
0.0809638	4	58	2.99813	Path:hsa00480 Glutathione metabolism	https://www.genome.jp/kegg-bin/show_pathway?hsa00480	GGT7 HPGDS GSTM5 GGCT
0.0825477	2	15	5.79639	Path:hsa00730 Thiamine metabolism	https://www.genome.jp/kegg-bin/show_pathway?hsa00730	AK1 ALPL
0.0827182	5	85	2.55723	Path:hsa01232 Nucleotide metabolism	https://www.genome.jp/kegg-bin/show_pathway?hsa01232	NT5C3B AK1 HPRT1 NT5C3A ENPP1
0.0827182	4	59	2.94732	Path:hsa04923 Regulation of lipolysis in adipocytes	https://www.genome.jp/kegg-bin/show_pathway?hsa04923	ADCY2 ADCY8 GNAI1 GNAI2
0.0827182	11	268	1.78434	Path:hsa05012 Parkinson disease	https://www.genome.jp/kegg-bin/show_pathway?hsa05012	GNAI1 GNAI2 UQCR10 MAPK8 MAPK9 MAPK10 SNCA CAMK2A CAMK2B CAMK2D CAMK2G
0.0827182	4	59	2.94732	Path:hsa05213 Endometrial cancer	https://www.genome.jp/kegg-bin/show_pathway?hsa05213	HRAS KRAS NRAS SOS1
0.0867565	3	36	3.62274	Path:hsa05143 African trypanosomiasis	https://www.genome.jp/kegg-bin/show_pathway?hsa05143	PLCB2 PLCB4 PRKCG
0.0894931	2	16	5.43411	Path:hsa00360 Phenylalanine metabolism	https://www.genome.jp/kegg-bin/show_pathway?hsa00360	ALDH3B1 GOT1
0.0917167	3	37	3.52483	Path:hsa05216 Thyroid cancer	https://www.genome.jp/kegg-bin/show_pathway?hsa05216	HRAS KRAS NRAS
0.107991	4	65	2.67526	Path:hsa00561 Glycerolipid metabolism	https://www.genome.jp/kegg-bin/show_pathway?hsa00561	DGKQ GK DGKE DGKD
0.116339	3	41	3.18094	Path:hsa04216 Ferroptosis	https://www.genome.jp/kegg-bin/show_pathway?hsa04216	PRNP SLC3A2 MAP1LC3A
0.118999	2	19	4.57609	Path:hsa00531 Glycosaminoglycan degradation	https://www.genome.jp/kegg-bin/show_pathway?hsa00531	GALNS ARSB
0.121053	4	68	2.55723	Path:hsa04924 Renin secretion	https://www.genome.jp/kegg-bin/show_pathway?hsa04924	GNAI1 GNAI2 PLCB2 PLCB4
0.13084	4	70	2.48417	Path:hsa04920 Adipocytokine signaling pathway	https://www.genome.jp/kegg-bin/show_pathway?hsa04920	MAPK8 MAPK9 MAPK10 PTPN11
0.140951	4	72	2.41516	Path:hsa04622 RIG-I-like receptor signaling pathway	https://www.genome.jp/kegg-bin/show_pathway?hsa04622	PIN1 MAPK8 MAPK9 MAPK10
0.148607	5	103	2.11033	Path:hsa00564 Glycerophospholipid metabolism	https://www.genome.jp/kegg-bin/show_pathway?hsa00564	DGKQ GPD1L GPCPD1 DGKE DGKD
0.151871	8	200	1.73892	Path:hsa05130 Pathogenic Escherichia coli infection	https://www.genome.jp/kegg-bin/show_pathway?hsa05130	FYN MYO1D MAPK8 MAPK9 MAPK10 PTPN11 RAB1A NCK2
0.173074	4	78	2.22938	Path:hsa05100 Bacterial invasion of epithelial cells	https://www.genome.jp/kegg-bin/show_pathway?hsa05100	CLTA CLTC RHOG CLTCL1
0.174662	5	109	1.99417	Path:hsa04066 HIF-1 signaling pathway	https://www.genome.jp/kegg-bin/show_pathway?hsa04066	PRKCG CAMK2A CAMK2B CAMK2D CAMK2G
0.174662	6	141	1.84991	Path:hsa05418 Fluid shear stress and atherosclerosis	https://www.genome.jp/kegg-bin/show_pathway?hsa05418	CTSL GSTM5 MAPK8 MAPK9 MAPK10 RAC3
0.189903	3	52	2.50805	Path:hsa04913 Ovarian steroidogenesis	https://www.genome.jp/kegg-bin/show_pathway?hsa04913	ADCY2 ADCY8 LDLR
